# Supplementary material
Source: publisher figshare collection journal article supplement (https://gsajournals.figshare.com/ndownloader/files/22625066)
Supplement: Supplementary file 1 [file 22625066]

## Sheet: Table S1
Sumnmary of changes done by polishing pipeline
Polishing version	v1	v2	v3
	Correcting all variants	Correcting only inconsistent variants	Correcting all variants, rescuing split variants
NUMBER OF EVENTS
insertions:	1325007	1112905	1117889
deletions	629167	490328	493134
substitutions:	2365129	249498	252260
NUMBER OF NUCLEOTIDES
inserted:	1752964	1234045	1249923
deleted:	943328	550598	560090
substituted:	2366074	249800	253368
GENOME SIZE
before:	2893031400	2893031400	2893031400
after:	2893841036	2893714847	2893721233

## Sheet: Table S2
Highly conserved genes that contain frameshifts in the final assembly
		kmers in frame that overlap with the reference protein
Gene name	Transcript ID	frame 1	frame 2	frame 3	Manual explanation
RGPD1	NM_001024457.3	664	269	220	Partially assembled gene - missing exon due to gap
NOS2	NM_000625.4	935	0	26	Partially assembled gene - missing exon due to gap
SMG1	NM_015092.4	1110	2421	1	False negative due to coverage bias
BMS1	NM_014753.3	260	1004	0	False negative due to coverage bias
VPS35L	NM_020314.5	1043	0	1	Likely false positive - there is a frameshift close to the end of the protein
EP400	NM_015409.4	2866	0	219	False negative due to coverage bias
VWA2	NM_001272046.1	615	0	8	Partially assembled gene - missing exon due to gap
FNDC1	NM_032532.2	0	519	741	Partially assembled gene - missing exon due to gap

## Sheet: Table S3
hash	Scaffold length	Sequence length	Pan genome alignment length	RepMasker annotation	RepMasker fraction overlap	Tandem repeat	Tandem repeat fraction
contig00006:1-32503	32503	32503	16212	no	NA	yes	0.998831
contig00011:1-26798	26798	26798	17358	Satellite	0.988805	yes	0.999552
contig00013:16871-18090	27966	1220	1217	Satellite	1	yes	1
contig00014:53464-57036	116223	3573	3573	no	NA	no	NA
contig00017:1-22705	22705	22705	20081	Satellite	0.774499	yes	1
contig00036:5931-15032	44979	9102	9102	Satellite	1	yes	1
contig00043:126365-143195	180566	16831	13756	centr	1	yes	1
contig00043:160751-171837	180566	11087	9348	centr	1	yes	1
contig00044:43415-57917	70741	14503	12530	Satellite	0.634627	yes	0.984486
contig00044:58338-60342	70741	2005	1994	Satellite	1	yes	1
contig00044:60736-70741	70741	10006	8402	Satellite	0.9999	yes	1
contig00045:1-18187	34021	18187	18180	no	NA	yes	1
contig00059:1-15558	15998	15558	11732	Satellite	0.98316	yes	1
contig00064:112670-123461	123461	10792	9320	centr	0.999907	yes	1
contig00076:11943-13175	33192	1233	1130	Satellite	1	yes	1
contig00081:93247-105729	122408	12483	12278	no	NA	yes	1
contig00083:7570-25051	45603	17482	13798	Satellite	0.509495	yes	1
contig00083:28722-29807	45603	1086	1086	Satellite	1	yes	1
contig00083:30202-45603	45603	15402	11803	Satellite	0.833723	yes	1
contig00088:1-37099	37099	37099	20277	Satellite	0.767783	yes	0.999919
contig00093:2603-19079	19079	16477	8777	no	NA	yes	1
contig00094:10747-13217	13217	2471	NA	Simple_repeat	0.996358	yes	0.996358
contig00106:1-30062	31071	30062	15013	Satellite	0.807631	yes	0.999933
contig00108:30879-91421	93317	60543	6434	Satellite	1	yes	1
contig00110:404-22057	22057	21654	13515	Satellite	0.982451	yes	1
contig00114:1231-2327	8632	1097	1097	Satellite	1	yes	1
contig00114:3502-4961	8632	1460	1390	Satellite	1	yes	1
contig00115:1-32862	32862	32862	17403	Satellite	0.999726	yes	0.999939
contig00120:26899-39507	39507	12609	8567	Satellite	0.63074	yes	1
scaffold00001:100985-103605	566516	2621	1011	Low_complexity	1	yes	1
contig00127:53583-74010	143805	20428	13481	centr	1	yes	1
contig00132:1-69930	69930	69930	24874	Satellite	0.982397	yes	0.999828
contig00142:595-22295	22783	21701	15865	Satellite	1	yes	1
contig00146:1-9694	70868	9694	9680	Satellite	0.820508	yes	1
contig00146:50630-58898	70868	8269	8269	Satellite	0.808562	yes	1
contig00146:64331-65756	70868	1426	1418	Satellite	1	yes	1
contig00152:1-16004	16004	16004	10647	centr	0.999875	yes	0.999938
contig00153:59480-77134	84416	17655	9472	centr	1	yes	1
contig00162:12771-27265	47965	14495	6401	no	NA	yes	1
contig00169:102956-106219	108392	3264	3264	no	NA	yes	1
contig00171:1-28797	101933	28797	13069	no	NA	yes	1
contig00171:34099-75663	101933	41565	20315	no	NA	yes	1
contig00179:1-16938	18332	16938	8450	Satellite	0.995867	yes	0.999764
contig00182:27300-32809	47469	5510	5508	centr	1	yes	1
contig00188:1-15215	15215	15215	13113	Satellite	0.999474	yes	0.999803
contig00199:1-17075	66027	17075	15124	centr	0.890952	yes	0.999941
contig00200:33405-34836	130267	1432	1360	Satellite	1	yes	1
contig00200:35261-54213	130267	18953	12373	Satellite	1	yes	1
contig00200:109765-130267	130267	20503	12892	no	NA	yes	0.999854
contig00205:51950-53947	172819	1998	1998	no	NA	yes	1
contig00207:1-13757	49983	13757	12154	Satellite	0.799011	yes	0.999927
contig00219:4517-5869	51978	1353	1198	centr	0.633407	yes	1
contig00220:17984-19062	25529	1079	1079	Satellite	1	yes	1
scaffold00002:72016-84854	632927	12839	12838	no	NA	no	NA
scaffold00002:85668-122064	632927	36397	17931	no	NA	no	NA
contig00230:128042-131790	360699	3749	3749	no	NA	no	NA
contig00233:19033-20125	42505	1093	1092	Satellite	1	yes	1
contig00233:20530-42505	42505	21976	18444	no	NA	yes	0.998362
contig00241:1-36681	244407	36681	15368	Satellite	0.575857	yes	1
contig00241:71225-107787	244407	36563	13351	no	NA	yes	1
contig00241:111404-122512	244407	11109	8328	no	NA	yes	1
contig00241:193271-207784	244407	14514	8789	Satellite	0.744178	yes	1
contig00241:210077-223544	244407	13468	11529	Satellite	0.647683	yes	1
contig00242:3680-33049	33049	29370	22055	Satellite	0.987368	yes	1
contig00253:1-23542	23542	23542	17628	Satellite	0.999618	yes	0.99966
contig00256:1288-22593	22593	21306	9644	Satellite	0.538487	yes	0.905942
contig00258:19841-48711	77639	28871	13778	Satellite	1	yes	1
contig00258:63515-77639	77639	14125	10353	Satellite	0.770336	yes	1
contig00261:1-22139	22139	22139	18608	Satellite	0.99991	yes	0.999955
contig00262:1-22658	22658	22658	15186	Satellite	0.999515	yes	0.999603
contig00269:7758-9376	19590	1619	1619	Satellite	1	yes	1
contig00276:45156-46797	99367	1642	1642	Simple_repeat	0.697929	yes	0.601096
contig00276:50688-57953	99367	7266	7266	Simple_repeat	0.836499	no	NA
contig00283:6456-20687	20687	14232	9496	no	NA	yes	1
contig00286:6761-33389	73465	26629	4671	no	NA	yes	1
contig00286:37265-55219	73465	17955	16017	no	NA	yes	1
contig00290:27260-31792	41609	4533	4533	centr	0.938893	yes	1
contig00297:23251-35541	52485	12291	9302	Satellite	0.981938	yes	1
contig00300:11552-20444	20444	8893	8893	Satellite	0.999888	yes	1
contig00305:1-28763	29180	28763	20578	Satellite	0.701909	yes	1
contig00307:1-1339	37089	1339	1338	Satellite	1	yes	1
contig00307:13438-37089	37089	23652	18505	Satellite	0.999915	yes	1
contig00309:1-1048	52924	1048	87	Low_complexity	0.808206	yes	0.790076
contig00345:1-1203	6027	1203	1203	Satellite	0.999169	yes	1
contig00348:80378-98008	109265	17631	12937	centr	1	yes	1
contig00350:18501-52177	52177	33677	19048	no	NA	yes	1
contig00352:1-33626	117787	33626	10180	no	NA	yes	1
contig00356:1-36476	36476	36476	24230	Satellite	0.852972	yes	1
contig00357:4118-15593	143539	11476	11473	centr	1	yes	1
contig00357:22320-25307	143539	2988	2980	centr	1	yes	1
contig00357:122851-141636	143539	18786	13081	centr	1	yes	1
contig00360:114663-116019	172017	1357	1202	centr	0.633751	yes	1
contig00372:4463-42272	42272	37810	18510	Satellite	1	yes	1
contig00384:10306-29651	32536	19346	15379	Satellite	0.967332	yes	1
contig00388:1-13144	13144	13144	13087	Satellite	0.999924	yes	1
contig00390:34820-88824	103078	54005	26889	Satellite	0.772521	yes	0.99576
contig00390:89223-103078	103078	13856	11750	Satellite	0.650476	yes	1
contig00391:1-20819	62279	20819	18458	Satellite	0.508046	yes	1
contig00391:21167-49340	62279	28174	21976	Satellite	0.554447	yes	1
contig00392:27711-45557	45557	17847	14752	Satellite	0.628453	yes	0.999888
contig00406:1-32594	32594	32594	20288	Satellite	0.907222	yes	1
contig00418:13096-43963	43963	30868	19125	no	NA	yes	1
contig00422:1-25250	25250	25250	21772	Satellite	0.999842	yes	0.999842
contig00436:28100-56348	56348	28249	19901	Satellite	0.965486	yes	1
contig00446:1-14036	14036	14036	11727	no	NA	yes	0.999786
contig00462:3061-18905	18905	15845	10755	centr	0.999811	yes	1
contig00465:78314-89997	143541	11684	10020	centr	1	yes	1
contig00475:608-27858	27858	27251	19347	Satellite	0.999927	yes	0.999303
contig00476:13337-43230	195364	29894	9606	no	NA	yes	1
contig00476:56197-77459	195364	21263	12038	Satellite	0.713681	yes	1
contig00476:79618-99099	195364	19482	11352	no	NA	yes	1
contig00476:100718-146589	195364	45872	19068	no	NA	yes	1
contig00476:149493-159534	195364	10042	5718	Satellite	1	yes	1
contig00476:184385-195364	195364	10980	7773	no	NA	yes	1
contig00477:3034-13851	13851	10818	10816	Satellite	0.784156	yes	0.998613
contig00480:5865-21626	23095	15762	14816	Satellite	0.544284	yes	1
contig00482:402-24173	67254	23772	17084	Satellite	0.766153	yes	1
contig00482:33204-51511	67254	18308	15839	Satellite	0.883439	yes	1
contig00482:66065-67254	67254	1190	1187	Satellite	0.994958	yes	0.996639
contig00491:427-11046	67486	10620	10084	Satellite	0.5871	yes	1
contig00491:11469-35398	67486	23930	16766	Satellite	1	yes	1
contig00491:35822-58482	67486	22661	21661	Satellite	1	yes	1
contig00491:58878-67486	67486	8609	8394	Satellite	0.999419	yes	0.999419
contig00508:30220-31647	127890	1428	1364	Satellite	1	yes	1
contig00508:32058-55398	127890	23341	15221	Satellite	0.593848	yes	1
contig00508:55820-75949	127890	20130	12032	Satellite	1	yes	1
contig00508:76340-86334	127890	9995	9995	Satellite	1	yes	1
contig00508:86761-103620	127890	16860	12313	Satellite	0.701423	yes	1
contig00508:104790-127890	127890	23101	16778	no	NA	yes	0.999913
contig00510:1-26332	26886	26332	20061	Satellite	0.63026	yes	1
contig00512:1-27616	27616	27616	15408	Satellite	0.833104	yes	0.999638
contig00513:91404-99979	99979	8576	5589	centr	1	yes	1
contig00536:1-10948	49416	10948	10941	no	NA	yes	0.998813
contig00540:1-22172	22827	22172	15231	Satellite	0.99982	yes	1
contig00542:15509-40227	82110	24719	17927	no	NA	no	NA
contig00547:17968-39030	104859	21063	9130	centr	1	yes	1
contig00548:6533-23104	46768	16572	10322	centr	0.825127	yes	1
contig00551:8811-10444	22910	1634	1505	Satellite	1	yes	1
contig00558:54666-87360	90783	32695	17493	Satellite	0.604251	yes	1
contig00569:34726-76317	232985	41592	14330	no	NA	no	NA
contig00570:1-15776	55526	15776	14692	Satellite	0.647819	yes	1
contig00570:35388-55526	55526	20139	13754	Satellite	0.999801	yes	0.998361
contig00577:37493-49341	82691	11849	9123	no	NA	no	NA
contig00583:19282-71455	117751	52174	31982	Satellite	0.844654	yes	1
contig00583:80796-105523	117751	24728	9814	no	NA	yes	1
contig00584:1-21041	21041	21041	15447	Satellite	0.805618	yes	0.999525
contig00600:1-22078	25135	22078	14815	Satellite	0.911994	yes	0.99923
contig00601:1-50646	67348	50646	19501	no	NA	yes	1
contig00601:51058-66843	67348	15786	15781	no	NA	yes	1
contig00607:525-41056	64407	40532	26888	Satellite	0.765691	yes	1
contig00607:48235-64407	64407	16173	13858	Satellite	0.576022	yes	1
contig00615:25499-37080	52175	11582	8866	Satellite	1	yes	1
contig00618:1-17638	44090	17638	7946	Satellite	0.999943	yes	1
contig00627:1-67944	67944	67944	22794	Satellite	0.733236	yes	0.999985
contig00630:3388-4528	28536	1141	1138	Satellite	0.549518	yes	1
contig00639:44116-54785	54785	10670	7712	centr	0.999719	yes	0.999906
contig00642:1-26655	26655	26655	13063	Satellite	0.90317	yes	0.998387
contig00647:26244-28946	58727	2703	1081	Simple_repeat	1	yes	0.933777
contig00649:1-17605	18038	17605	15555	Satellite	0.999943	yes	1
contig00656:4996-25781	91855	20786	17011	Satellite	0.793515	yes	1
contig00656:30953-32003	91855	1051	1050	Satellite	1	yes	1
contig00656:62509-72456	91855	9948	9948	Satellite	0.841677	yes	1
contig00662:33469-54880	90634	21412	9048	Satellite	0.596348	yes	1
contig00663:1-18842	119991	18842	7022	centr	0.999947	yes	1
contig00666:2577-20930	78480	18354	11996	Satellite	0.529912	yes	1
contig00666:21352-43835	78480	22484	14149	Satellite	1	yes	1
contig00666:44259-70663	78480	26405	20887	Satellite	0.675857	yes	1
contig00670:24091-37055	55436	12965	12388	no	NA	yes	1
contig00670:37475-38619	55436	1145	1145	Satellite	0.520524	yes	1
contig00670:39971-43658	55436	3688	3678	Satellite	1	yes	1
contig00670:51331-52412	55436	1082	1081	Satellite	1	yes	1
contig00675:17627-25622	186543	7996	7510	centr	1	yes	1
contig00687:8431-9686	19272	1256	1256	Satellite	1	yes	1
contig00695:3841-17658	17658	13818	12692	Satellite	0.854538	yes	1
contig00700:1-18796	26856	18796	18796	no	NA	no	NA
contig00702:1-29207	29207	29207	15899	Satellite	0.558428	yes	0.999897
contig00729:29941-31182	31182	1242	1177	Satellite	1	yes	1
contig00734:1-21468	21468	21468	12288	Satellite	0.882663	yes	0.998603
contig00740:25099-55344	55344	30246	8467	Satellite	0.756563	yes	1
contig00751:368-2190	32600	1823	1822	Satellite	1	yes	1
contig00751:21557-22637	32600	1081	1081	Satellite	1	yes	1
contig00751:23058-24531	32600	1474	1473	Satellite	1	yes	1
contig00760:11712-26693	41179	14982	13066	Satellite	0.641103	yes	1
contig00761:27404-38443	58612	11040	11040	Satellite	1	yes	1
contig00761:45876-47115	58612	1240	1239	Satellite	1	yes	1
contig00763:122897-139801	139801	16905	9420	centr	0.988228	yes	1
contig00769:7996-9060	9705	1065	1065	Satellite	1	yes	1
contig00773:1-12489	13268	12489	12484	Satellite	0.998078	yes	0.9996
scaffold00005:441143-443469	93204072	2327	2299	no	NA	no	NA
scaffold00005:27758459-27759869	93204072	1411	1411	no	NA	yes	1
scaffold00005:50259983-50261061	93204072	1079	932	Simple_repeat	0.873957	yes	0.875811
scaffold00005:53919354-53923444	93204072	4091	4091	Simple_repeat	0.929602	yes	0.980445
scaffold00005:76785810-76787916	93204072	2107	2107	no	NA	yes	0.996678
scaffold00006:85791466-85792670	91981836	1205	1205	no	NA	no	NA
scaffold00006:90477137-90478497	91981836	1361	NA	no	NA	yes	0.959589
scaffold00007:1108952-1110714	24691519	1763	1763	Low_complexity	1	yes	1
scaffold00007:8547859-8549840	24691519	1982	1982	no	NA	no	NA
scaffold00007:15802840-15817679	24691519	14840	14824	no	NA	no	NA
scaffold00007:17337450-17354854	24691519	17405	4356	no	NA	yes	1
scaffold00007:24038918-24041288	24691519	2371	NA	Simple_repeat	1	yes	0.92113
scaffold00008:80049766-80052770	105275334	3005	1672	no	NA	no	NA
scaffold00008:102222929-102226243	105275334	3315	3314	no	NA	no	NA
scaffold00009:14084595-14088868	138122963	4274	3520	no	NA	no	NA
scaffold00009:46807573-46809264	138122963	1692	1692	no	NA	no	NA
scaffold00009:102220312-102224813	138122963	4502	4501	no	NA	no	NA
scaffold00009:137601132-137604560	138122963	3429	NA	no	NA	yes	1
scaffold00009:137724035-137726149	138122963	2115	NA	no	NA	yes	1
scaffold00011:31575618-31581921	221368183	6304	NA	Simple_repeat	1	yes	1
scaffold00013:132809-134121	58238770	1313	NA	no	NA	yes	1
scaffold00013:979236-982397	58238770	3162	314	no	NA	no	NA
scaffold00013:37053426-37061224	58238770	7799	7799	Simple_repeat	0.712784	yes	0.679703
scaffold00014:125425-127643	54590938	2219	NA	no	NA	no	NA
scaffold00014:3805563-3807093	54590938	1531	NA	Simple_repeat	1	yes	1
scaffold00015:4324514-4326537	35274264	2024	NA	Simple_repeat	1	yes	1
scaffold00015:26864411-26868688	35274264	4278	909	no	NA	no	NA
scaffold00015:26891137-26892814	35274264	1678	844	no	NA	no	NA
scaffold00015:26895888-26903832	35274264	7945	2702	no	NA	no	NA
scaffold00015:26904498-26905767	35274264	1270	NA	no	NA	no	NA
scaffold00015:26908019-26909992	35274264	1974	NA	no	NA	no	NA
scaffold00015:28481390-28485608	35274264	4219	4219	no	NA	no	NA
scaffold00015:28487928-28490487	35274264	2560	2560	no	NA	no	NA
scaffold00015:30887275-30888477	35274264	1203	1203	no	NA	yes	0.742311
scaffold00016:17689016-17690284	87246917	1269	692	L1	0.903861	no	NA
scaffold00016:69086175-69088901	87246917	2727	2727	no	NA	no	NA
scaffold00016:85243211-85246712	87246917	3502	3502	Simple_repeat	0.622216	yes	1
scaffold00017:30328440-30332196	33842722	3757	3735	Simple_repeat	1	yes	1
scaffold00017:30373955-30376054	33842722	2100	2095	no	NA	yes	0.921905
scaffold00017:33839103-33842722	33842722	3620	1299	Simple_repeat	0.967956	yes	0.967956
scaffold00018:125268844-125272333	134904328	3490	3490	no	NA	no	NA
scaffold00019:31387012-31388530	50382282	1519	1519	Simple_repeat	1	yes	1
scaffold00020:39676313-39681227	50729179	4915	4411	no	NA	no	NA
scaffold00020:43120666-43126552	50729179	5887	5459	no	NA	no	NA
scaffold00020:48876128-48877517	50729179	1390	NA	no	NA	yes	0.978417
scaffold00020:49222300-49224669	50729179	2370	1291	no	NA	no	NA
scaffold00021:25866582-25868252	58442709	1671	1671	no	NA	no	NA
scaffold00021:25915551-25921120	58442709	5570	3697	ERV1	0.533752	no	NA
scaffold00021:58395676-58399764	58442709	4089	4039	no	NA	no	NA
scaffold00021:58400782-58404194	58442709	3413	1649	no	NA	no	NA
scaffold00022:1-3491	46867949	3491	1443	Simple_repeat	1	yes	1
scaffold00022:6899034-6900544	46867949	1511	1356	no	NA	no	NA
scaffold00022:24641135-24642291	46867949	1157	985	no	NA	no	NA
scaffold00022:29131143-29140080	46867949	8938	8938	no	NA	no	NA
scaffold00022:46653026-46670605	46867949	17580	14266	centr	0.51405	yes	1
scaffold00023:3287161-3293230	96149688	6070	5724	no	NA	no	NA
scaffold00024:2454553-2525879	96057442	71327	63464	no	NA	no	NA
scaffold00024:2550676-2601522	96057442	50847	50847	no	NA	no	NA
scaffold00024:16990962-16992937	96057442	1976	1974	Simple_repeat	1	no	NA
scaffold00024:28069373-28088791	96057442	19419	12066	no	NA	no	NA
scaffold00024:75386598-75389800	96057442	3203	2314	Simple_repeat	0.853575	yes	1
scaffold00025:1345184-1354495	97594258	9312	NA	no	NA	yes	1
scaffold00025:1784611-1786567	97594258	1957	1957	no	NA	yes	1
scaffold00025:17291644-17296694	97594258	5051	5051	no	NA	no	NA
scaffold00025:27606580-27608021	97594258	1442	NA	Low_complexity	1	yes	0.88835
scaffold00025:83485781-83488434	97594258	2654	2435	Simple_repeat	1	yes	0.785607
scaffold00025:94593166-94597987	97594258	4822	1115	no	NA	no	NA
scaffold00026:7928913-7935175	9668701	6263	NA	no	NA	yes	1
scaffold00027:1-5872	80608845	5872	1614	Simple_repeat	0.969346	yes	0.969346
scaffold00027:13087752-13089628	80608845	1877	NA	Simple_repeat	0.594033	yes	1
scaffold00027:64786260-64791652	80608845	5393	5393	no	NA	yes	1
scaffold00027:78427602-78433438	80608845	5837	5837	no	NA	no	NA
scaffold00027:78762343-78769093	80608845	6751	6751	no	NA	no	NA
scaffold00028:768995-770198	26445240	1204	982	no	NA	no	NA
scaffold00029:39670646-39676156	39676156	5511	1488	Simple_repeat	1	yes	1
scaffold00030:27181082-27182388	142895498	1307	NA	no	NA	yes	1
scaffold00030:54494887-54497037	142895498	2151	867	no	NA	no	NA
scaffold00030:54505650-54508202	142895498	2553	1002	no	NA	no	NA
scaffold00030:141423289-141429658	142895498	6370	NA	no	NA	yes	1
scaffold00030:141887670-141892443	142895498	4774	NA	no	NA	yes	1
scaffold00032:362008-364341	21619600	2334	2264	Simple_repeat	1	yes	1
scaffold00033:7243818-7260641	31891118	16824	16824	no	NA	no	NA
scaffold00034:4320811-4331512	110770708	10702	3297	Simple_repeat	0.676603	yes	0.676603
scaffold00034:10479883-10483277	110770708	3395	3395	Simple_repeat	0.551105	yes	0.716937
scaffold00034:12929402-12933326	110770708	3925	3924	Simple_repeat	1	yes	1
scaffold00034:91352802-91380632	110770708	27831	24630	no	NA	no	NA
scaffold00035:696229-697814	130453317	1586	NA	no	NA	yes	0.931274
scaffold00035:62742533-62751142	130453317	8610	7584	no	NA	yes	0.919396
scaffold00035:86077849-86092141	130453317	14293	11598	no	NA	no	NA
scaffold00036:1916139-1938689	15564209	22551	19138	no	NA	no	NA
scaffold00037:113507-129228	3165449	15722	8237	no	NA	no	NA
scaffold00037:1067492-1087036	3165449	19545	9398	no	NA	no	NA
scaffold00037:1163155-1185318	3165449	22164	14163	no	NA	no	NA
scaffold00042:158318-199425	1458444	41108	14084	no	NA	no	NA
scaffold00042:215459-221982	1458444	6524	4865	Satellite	0.586143	yes	0.586143
scaffold00042:311409-335521	1458444	24113	11967	Satellite	0.5079	no	NA
scaffold00042:1041943-1074932	1458444	32990	9596	no	NA	no	NA
scaffold00043:70238059-70242923	90517648	4865	4865	no	NA	no	NA
scaffold00043:76592366-76593476	90517648	1111	NA	Simple_repeat	0.9964	yes	1
scaffold00044:34825-81556	2077305	46732	34642	no	NA	no	NA
scaffold00044:406122-436332	2077305	30211	16044	Simple_repeat	0.652742	yes	1
scaffold00044:1353790-1355526	2077305	1737	1468	Simple_repeat	0.938975	yes	0.945884
scaffold00046:1-1459	2289061	1459	1459	no	NA	yes	0.677176
scaffold00046:92661-131901	2289061	39241	10433	no	NA	no	NA
scaffold00047:18931894-18933420	80798563	1527	1527	Simple_repeat	1	yes	1
scaffold00047:55957895-55960057	80798563	2163	999	Low_complexity	0.997226	yes	0.996301
scaffold00047:80309170-80310478	80798563	1309	NA	no	NA	yes	1
scaffold00051:1849735-1851707	2181783	1973	1556	no	NA	no	NA
scaffold00051:1884463-1934830	2181783	50368	24300	centr	0.618011	no	NA
scaffold00054:10729129-10730514	70390939	1386	NA	Simple_repeat	1	yes	0.890332
scaffold00054:58949918-58951298	70390939	1381	NA	Simple_repeat	1	yes	1
scaffold00054:65665567-65667572	70390939	2006	2006	no	NA	yes	1
scaffold00054:69416520-69423612	70390939	7093	NA	no	NA	yes	1
contig00799:1703983-1709672	59408178	5690	5690	no	NA	no	NA
contig00799:42325950-42327102	59408178	1153	NA	no	NA	yes	0.934952
contig00799:46544827-46565264	59408178	20438	20438	no	NA	no	NA
contig00799:47320700-47322002	59408178	1303	1301	Simple_repeat	0.941673	yes	0.941673
contig00799:57352252-57353706	59408178	1455	1098	Simple_repeat	0.946392	yes	0.949828
scaffold00055:131840-132964	40639477	1125	747	L1	0.551111	no	NA
scaffold00055:166592-167644	40639477	1053	1053	no	NA	yes	0.926876
scaffold00055:435415-438836	40639477	3422	2675	no	NA	no	NA
scaffold00055:455909-473954	40639477	18046	9668	no	NA	no	NA
scaffold00055:505157-533904	40639477	28748	8617	Satellite	0.561396	yes	0.561361
scaffold00055:35244250-35246282	40639477	2033	2033	Simple_repeat	1	yes	1
scaffold00056:23676397-23678288	34616643	1892	1338	no	NA	no	NA
scaffold00057:1399309-1403133	33105534	3825	NA	no	NA	yes	0.826144
scaffold00057:31134515-31138364	33105534	3850	NA	Low_complexity	1	yes	1
scaffold00057:31927911-31930109	33105534	2199	2199	Simple_repeat	1	yes	1
scaffold00058:8482858-8487080	29529388	4223	4223	no	NA	no	NA
scaffold00058:12882458-12884947	29529388	2490	1853	Low_complexity	1	yes	1
scaffold00058:27271512-27274229	29529388	2718	1074	Simple_repeat	1	no	NA
scaffold00059:4692-7897	699582	3206	3206	no	NA	yes	1
contig00800:69977-90770	891517	20794	18789	no	NA	no	NA
scaffold00066:299764-301123	323415	1360	1360	Simple_repeat	1	yes	1
scaffold00068:50051-53279	453611	3229	3192	no	NA	yes	1

## Sheet: Table S4
Statistics of libraries sorted 5 chrom / well
	plate	row	column	Total_reads	dup_rate	success	n_enriched	enrichment	snp count
p6_wA1	p01	0	0	826833	0.0723131	FALSE	9	1.77564
p6_wA2	p01	0	1	405463	0.0965018	FALSE	5	1.91333
p6_wA3	p01	0	2	278430	0.0943854	FALSE	1	9.50641
p6_wA4	p01	0	3	323559	0.0952875	FALSE	9	1.36183
p6_wA5	p01	0	4	528604	0.083202	FALSE	5	1.76927
p6_wA6	p01	0	5	818461	0.0590943	TRUE	1	11.5539	2129
p6_wA7	p01	0	6	665478	0.0753379	FALSE	3	3.52017
p6_wA8	p01	0	7	151933	0.125611	FALSE	9	1.49392
p6_wA9	p01	0	8	340099	0.0881616	FALSE	1	4.89846
p6_wA10	p01	0	9	280687	0.0956704	FALSE	4	1.6217
p6_wA11	p01	0	10	311994	0.0984667	FALSE	9	1.49199
p6_wA12	p01	0	11	727839	0.0562145	TRUE	1	49.0726	3101
p6_wA13	p01	0	12	2742083	0.0399556	TRUE	3	34.7239	10789
p6_wA14	p01	0	13	607131	0.0831751	FALSE	4	1.91433
p6_wA15	p01	0	14	642528	0.0791171	FALSE	8	1.44866
p6_wA16	p01	0	15	498469	0.0842735	FALSE	7	1.4497
p6_wA17	p01	0	16	276302	0.0976045	FALSE	7	1.61639
p6_wA18	p01	0	17	836277	0.0655981	FALSE	10	1.37961
p6_wA19	p01	0	18	555992	0.0708955	FALSE	1	1.99765
p6_wA20	p01	0	19	420287	0.0858551	FALSE	5	1.5845
p6_wA21	p01	0	20	877532	0.0646729	FALSE	1	2.34298
p6_wA22	p01	0	21	411265	0.0874597	FALSE	4	1.77
p6_wA23	p01	0	22	671523	0.0676499	FALSE	12	1.33269
p6_wA24	p01	0	23	304453	0.0803054	FALSE	3	1.66105
p6_wB1	p01	1	0	1082389	0.0533393	TRUE	1	36.9926	3962
p6_wB2	p01	1	1	140164	0.198962	FALSE	4	1.94289
p6_wB3	p01	1	2	833344	0.071797	FALSE	3	2.39452
p6_wB4	p01	1	3	217453	0.111221	FALSE	13	1.4281
p6_wB5	p01	1	4	512441	0.0804386	FALSE	2	2.15577
p6_wB6	p01	1	5	461621	0.0964858	FALSE	7	1.55455
p6_wB7	p01	1	6	597806	0.0572802	TRUE	1	78.1491	3155
p6_wB8	p01	1	7	311357	0.117879	FALSE	8	1.45242
p6_wB9	p01	1	8	351158	0.0932575	FALSE	7	1.51976
p6_wB10	p01	1	9	196843	0.105214	FALSE	4	1.84355
p6_wB11	p01	1	10	132113	0.121424	FALSE	4	1.74985
p6_wB12	p01	1	11	435002	0.0858839	FALSE	1	2.20526
p6_wB13	p01	1	12	544141	0.0778083	FALSE	3	1.57317
p6_wB14	p01	1	13	417857	0.0855788	FALSE	4	1.77651
p6_wB15	p01	1	14	200342	0.107377	FALSE	9	1.52603
p6_wB16	p01	1	15	139514	0.138608	FALSE	2	1.52731
p6_wB17	p01	1	16	840769	0.0720034	FALSE	7	1.56081
p6_wB18	p01	1	17	3260817	0.166527	FALSE	8	2.79605
p6_wB19	p01	1	18	910108	0.0651942	FALSE	2	2.54717
p6_wB20	p01	1	19	246553	0.10302	FALSE	1	1.95451
p6_wB21	p01	1	20	432601	0.0832973	FALSE	2	2.03009
p6_wB22	p01	1	21	77924	0.155696	FALSE	6	1.64666
p6_wB23	p01	1	22	724517	0.057207	TRUE	1	90.7102	3888
p6_wB24	p01	1	23	120050	0.128297	FALSE	10	1.3441
p6_wC1	p01	2	0	324576	0.116904	FALSE	8	1.813
p6_wC2	p01	2	1	3368721	0.0553156	TRUE	2	167.252	24935
p6_wC3	p01	2	2	609037	0.0800534	FALSE	5	2.25521
p6_wC4	p01	2	3	511953	0.0718717	TRUE	1	22.646	1651
p6_wC5	p01	2	4	859843	0.072574	FALSE	4	1.92563
p6_wC6	p01	2	5	520210	0.0816888	FALSE	8	1.73058
p6_wC7	p01	2	6	202875	0.112461	FALSE	8	1.77183
p6_wC8	p01	2	7	474422	0.0962108	FALSE	11	1.48646
p6_wC9	p01	2	8	406634	0.0960066	FALSE	6	1.59028
p6_wC10	p01	2	9	169236	0.117232	FALSE	5	1.78466
p6_wC11	p01	2	10	140985	0.128986	FALSE	9	1.48373
p6_wC12	p01	2	11	557554	0.0827886	FALSE	1	2.16925
p6_wC13	p01	2	12	842860	0.0677074	FALSE	3	2.96894
p6_wC14	p01	2	13	173916	0.114198	FALSE	9	1.65034
p6_wC15	p01	2	14	707098	0.0805859	TRUE	1	41.084	2049
p6_wC16	p01	2	15	371696	0.0916235	FALSE	7	1.51741
p6_wC17	p01	2	16	318726	0.0998645	FALSE	10	1.42271
p6_wC18	p01	2	17	508781	0.077119	FALSE	4	1.82125
p6_wC19	p01	2	18	474223	0.080313	FALSE	6	1.65116
p6_wC20	p01	2	19	437656	0.0859966	FALSE	1	2.22183
p6_wC21	p01	2	20	749589	0.0760865	FALSE	3	1.71349
p6_wC22	p01	2	21	492645	0.0830439	FALSE	2	6.22169
p6_wC23	p01	2	22	830476	0.055175	TRUE	1	36.4458	3314
p6_wC24	p01	2	23	260889	0.0947968	FALSE	5	1.56472
p6_wD1	p01	3	0	2790254	0.0478251	TRUE	1	335.374	22047
p6_wD2	p01	3	1	408813	0.108715	FALSE	5	2.32402
p6_wD3	p01	3	2	317280	0.0943822	FALSE	8	1.72683
p6_wD4	p01	3	3	1922751	0.115217	FALSE	1	5.33721
p6_wD5	p01	3	4	299395	0.0888468	FALSE	7	1.58022
p6_wD6	p01	3	5	283793	0.0963011	FALSE	4	2.36062
p6_wD7	p01	3	6	472726	0.0754195	FALSE	2	3.33205
p6_wD8	p01	3	7	162103	0.131293	FALSE	3	2.03994
p6_wD9	p01	3	8	801916	0.0722416	FALSE	5	1.65206
p6_wD10	p01	3	9	222234	0.104994	FALSE	7	1.87015
p6_wD11	p01	3	10	685926	0.0625339	TRUE	1	14.3036	1751
p6_wD12	p01	3	11	365138	0.0808302	FALSE	6	1.6729
p6_wD13	p01	3	12	685322	0.0680466	FALSE	4	1.84405
p6_wD14	p01	3	13	473513	0.0777989	FALSE	7	1.6717
p6_wD15	p01	3	14	352686	0.0893239	FALSE	8	1.56362
p6_wD16	p01	3	15	408068	0.085728	FALSE	6	1.6707
p6_wD17	p01	3	16	650783	0.0736994	FALSE	8	1.52215
p6_wD18	p01	3	17	555763	0.0687063	FALSE	1	2.01676
p6_wD19	p01	3	18	805689	0.061981	FALSE	8	1.50784
p6_wD20	p01	3	19	551142	0.073914	FALSE	7	1.50499
p6_wD21	p01	3	20	400832	0.0810297	FALSE	5	1.75959
p6_wD22	p01	3	21	173547	0.110758	FALSE	10	1.47839
p6_wD23	p01	3	22	397687	0.0797224	FALSE	8	1.42877
p6_wD24	p01	3	23	623614	0.0645935	FALSE	8	1.42523
p6_wE1	p01	4	0	606057	0.0796407	FALSE	1	9.25998
p6_wE2	p01	4	1	1509247	0.0560646	TRUE	1	200.351	13681
p6_wE3	p01	4	2	4673138	0.0532006	TRUE	2	161.067	37289
p6_wE4	p01	4	3	1369259	0.0762275	FALSE	1	2.06417
p6_wE5	p01	4	4	411865	0.0888648	FALSE	8	1.81191
p6_wE6	p01	4	5	507262	0.0908251	FALSE	4	3.45395
p6_wE7	p01	4	6	240788	0.110983	FALSE	3	2.63786
p6_wE8	p01	4	7	153689	0.138811	FALSE	7	1.63635
p6_wE9	p01	4	8	495115	0.0921333	FALSE	6	1.96376
p6_wE10	p01	4	9	1343700	0.0837652	TRUE	1	337.703	10008
p6_wE11	p01	4	10	186205	0.125088	FALSE	4	1.88186
p6_wE12	p01	4	11	433223	0.0911748	FALSE	1	2.50629
p6_wE13	p01	4	12	752889	0.071612	FALSE	4	1.68318
p6_wE14	p01	4	13	447908	0.0896423	FALSE	4	2.17553
p6_wE15	p01	4	14	210129	0.118605	FALSE	5	1.9695
p6_wE16	p01	4	15	451434	0.0927682	FALSE	4	1.83648
p6_wE17	p01	4	16	248161	0.110349	FALSE	5	1.89134
p6_wE18	p01	4	17	668326	0.0734026	FALSE	6	1.54468
p6_wE19	p01	4	18	431343	0.0878858	FALSE	2	2.04931
p6_wE20	p01	4	19	549929	0.0773434	FALSE	1	2.29192
p6_wE21	p01	4	20	868928	0.070104	FALSE	7	1.72367
p6_wE22	p01	4	21	436981	0.0869162	FALSE	1	2.21629
p6_wE23	p01	4	22	491140	0.0861076	FALSE	5	1.85201
p6_wE24	p01	4	23	863581	0.0631881	FALSE	6	1.6013
p6_wF1	p01	5	0	2876861	0.0568472	TRUE	3	91.6383	23445
p6_wF2	p01	5	1	73991	0.346023	FALSE	7	2.16871
p6_wF3	p01	5	2	1222490	0.0769973	FALSE	3	3.89492
p6_wF4	p01	5	3	825332	0.0890088	FALSE	1	1.89285
p6_wF5	p01	5	4	480308	0.0706173	TRUE	1	11.4721	1487
p6_wF6	p01	5	5	1075141	0.0747657	TRUE	1	31.5918	2427
p6_wF7	p01	5	6	565954	0.0810525	FALSE	2	2.21199
p6_wF8	p01	5	7	248007	0.133056	FALSE	3	1.91663
p6_wF9	p01	5	8	534812	0.0893475	FALSE	9	1.50217
p6_wF10	p01	5	9	933811	0.0886819	FALSE	4	2.12872
p6_wF11	p01	5	10	287110	0.106102	FALSE	2	1.84101
p6_wF12	p01	5	11	292632	0.098806	FALSE	3	1.60724
p6_wF13	p01	5	12	372032	0.0886049	FALSE	1	2.57088
p6_wF14	p01	5	13	719058	0.0789263	FALSE	6	1.75418
p6_wF15	p01	5	14	115505	0.128485	FALSE	10	1.59155
p6_wF16	p01	5	15	165847	0.11996	FALSE	1	5.18544
p6_wF17	p01	5	16	274878	0.101402	FALSE	13	1.54111
p6_wF18	p01	5	17	381030	0.0830998	FALSE	4	1.70697
p6_wF19	p01	5	18	244854	0.0977515	FALSE	3	1.79877
p6_wF20	p01	5	19	182645	0.107122	FALSE	2	1.8316
p6_wF21	p01	5	20	1094455	0.0671558	FALSE	5	1.56314
p6_wF22	p01	5	21	464414	0.0892836	FALSE	8	1.52953
p6_wF23	p01	5	22	1085301	0.0680255	FALSE	1	2.10826
p6_wF24	p01	5	23	423439	0.0804954	FALSE	7	1.67597
p6_wG1	p01	6	0	2192216	0.0552102	TRUE	1	287.62	21783
p6_wG2	p01	6	1	1442032	0.128205	FALSE	6	1.59583
p6_wG3	p01	6	2	625987	0.0931352	FALSE	7	1.64736
p6_wG4	p01	6	3	1061469	0.0885627	FALSE	1	4.34323
p6_wG5	p01	6	4	305915	0.0976278	TRUE	1	19.4203	747
p6_wG6	p01	6	5	318097	0.117636	FALSE	8	1.92094
p6_wG7	p01	6	6	569866	0.089675	FALSE	8	1.79475
p6_wG8	p01	6	7	146691	0.145645	FALSE	2	5.13946
p6_wG9	p01	6	8	454508	0.107467	FALSE	11	1.56503
p6_wG10	p01	6	9	238217	0.113509	FALSE	6	1.68784
p6_wG11	p01	6	10	221335	0.130576	FALSE	9	1.46126
p6_wG12	p01	6	11	204061	0.128336	FALSE	10	1.51737
p6_wG13	p01	6	12	346887	0.0961268	FALSE	7	1.5112
p6_wG14	p01	6	13	250447	0.108686	FALSE	8	1.63113
p6_wG15	p01	6	14	343023	0.115414	FALSE	8	1.47859
p6_wG16	p01	6	15	490506	0.101456	TRUE	1	10.0434	741
p6_wG17	p01	6	16	131675	0.137284	FALSE	6	1.61919
p6_wG18	p01	6	17	379236	0.0883985	FALSE	5	1.66826
p6_wG19	p01	6	18	561418	0.0804829	FALSE	7	1.61048
p6_wG20	p01	6	19	393156	0.109616	FALSE	7	1.49805
p6_wG21	p01	6	20	407126	0.100306	FALSE	10	1.37153
p6_wG22	p01	6	21	133276	0.140585	FALSE	4	1.8813
p6_wG23	p01	6	22	430041	0.0992404	FALSE	6	1.58566
p6_wG24	p01	6	23	555400	0.0862211	FALSE	1	4.86701
p6_wH1	p01	7	0	557732	0.0716201	TRUE	2	14.4421	2636
p6_wH2	p01	7	1	451034	0.116505	FALSE	7	1.64738
p6_wH3	p01	7	2	2521275	0.0790829	FALSE	5	1.72997
p6_wH4	p01	7	3	550090	0.105406	FALSE	7	1.39911
p6_wH5	p01	7	4	466744	0.0843227	FALSE	1	3.47536
p6_wH6	p01	7	5	364893	0.118615	FALSE	1	9.68113
p6_wH7	p01	7	6	386610	0.0917579	FALSE	10	1.74721
p6_wH8	p01	7	7	115516	0.225694	FALSE	10	1.46789
p6_wH9	p01	7	8	156683	0.127373	FALSE	9	1.60562
p6_wH10	p01	7	9	152116	0.125123	FALSE	10	1.62229
p6_wH11	p01	7	10	1462780	0.0594702	TRUE	2	92.5434	11801
p6_wH12	p01	7	11	238745	0.109537	FALSE	9	1.47467
p6_wH13	p01	7	12	584342	0.0711062	FALSE	1	8.19195
p6_wH14	p01	7	13	282925	0.0928584	FALSE	11	1.51894
p6_wH15	p01	7	14	538495	0.0659115	TRUE	1	78.3634	4228
p6_wH16	p01	7	15	501444	0.0938502	FALSE	7	1.53425
p6_wH17	p01	7	16	241045	0.107606	FALSE	8	1.71979
p6_wH18	p01	7	17	631619	0.0746601	FALSE	5	1.62316
p6_wH19	p01	7	18	276275	0.0827228	TRUE	1	26.265	1683
p6_wH20	p01	7	19	605709	0.0632579	TRUE	1	146.429	4883
p6_wH21	p01	7	20	229075	0.111513	FALSE	13	1.51911
p6_wH22	p01	7	21	1862790	0.0640327	TRUE	1	244.738	12380
p6_wH23	p01	7	22	250460	0.100136	FALSE	1	5.8219
p6_wH24	p01	7	23	380958	0.0705629	TRUE	1	20.3131
p6_wI1	p01	8	0	3787893	0.050389	TRUE	1	244.6	28202
p6_wI2	p01	8	1	499852	0.0933915	FALSE	6	2.98511
p6_wI3	p01	8	2	295489	0.0986036	TRUE	1	27.2742	1098
p6_wI4	p01	8	3	696331	0.0781037	FALSE	1	6.21038
p6_wI5	p01	8	4	843021	0.0780498	FALSE	12	1.5451
p6_wI6	p01	8	5	2768044	0.0549614	TRUE	2	234.633	26049
p6_wI7	p01	8	6	782907	0.0760133	FALSE	1	4.00725
p6_wI8	p01	8	7	741899	0.0885632	TRUE	1	16.3607	1100
p6_wI9	p01	8	8	190787	0.121217	FALSE	10	1.79134
p6_wI10	p01	8	9	559786	0.0840508	FALSE	2	2.00625
p6_wI11	p01	8	10	145697	0.134025	FALSE	7	1.59623
p6_wI12	p01	8	11	1835010	0.0564606	TRUE	1	141.441	14580
p6_wI13	p01	8	12	494747	0.0804803	FALSE	4	1.94217
p6_wI14	p01	8	13	245440	0.0854403	TRUE	1	13.2148	835
p6_wI15	p01	8	14	383668	0.0971286	FALSE	12	1.54513
p6_wI16	p01	8	15	367101	0.0912594	FALSE	11	1.55562
p6_wI17	p01	8	16	288946	0.10092	FALSE	8	1.8914
p6_wI18	p01	8	17	562616	0.0751387	FALSE	12	1.45311
p6_wI19	p01	8	18	337138	0.0973503	FALSE	8	1.50979
p6_wI20	p01	8	19	496249	0.0829717	FALSE	1	2.16308
p6_wI21	p01	8	20	344608	0.0980699	FALSE	8	1.47177
p6_wI22	p01	8	21	1727397	0.0795991	TRUE	1	333.075	12895
p6_wI23	p01	8	22	322767	0.0954312	FALSE	1	3.36971
p6_wI24	p01	8	23	750273	0.0691414	FALSE	12	1.34243
p6_wJ1	p01	9	0	4628931	0.0433006	TRUE	1	248.312	29884
p6_wJ2	p01	9	1	390158	0.0920786	TRUE	1	17.9343	1821
p6_wJ3	p01	9	2	400730	0.101326	FALSE	6	1.89488
p6_wJ4	p01	9	3	189845	0.128696	FALSE	3	2.59853
p6_wJ5	p01	9	4	556269	0.0644198	TRUE	1	28.9701	2914
p6_wJ6	p01	9	5	1699466	0.0594753	TRUE	2	117.582	12925
p6_wJ7	p01	9	6	851966	0.051502	TRUE	1	95.0655	5820
p6_wJ8	p01	9	7	251953	0.124756	FALSE	8	1.82143
p6_wJ9	p01	9	8	702735	0.0635865	TRUE	1	54.6041	3390
p6_wJ10	p01	9	9	2242709	0.0825745	TRUE	1	344.405	11883
p6_wJ11	p01	9	10	451696	0.0906867	TRUE	1	11.3531	1099
p6_wJ12	p01	9	11	1467181	0.0718677	TRUE	1	208.985	12034
p6_wJ13	p01	9	12	572482	0.051855	TRUE	1	41.0624	2974
p6_wJ14	p01	9	13	193951	0.108797	FALSE	5	1.75267
p6_wJ15	p01	9	14	227508	0.115079	FALSE	7	1.78483
p6_wJ16	p01	9	15	686223	0.0721782	FALSE	6	1.67668
p6_wJ17	p01	9	16	557814	0.0735395	TRUE	1	22.7411	1077
p6_wJ18	p01	9	17	726755	0.0659244	FALSE	6	1.57829
p6_wJ19	p01	9	18	281986	0.0906897	FALSE	11	1.62756
p6_wJ20	p01	9	19	390382	0.084627	FALSE	1	8.05099
p6_wJ21	p01	9	20	593217	0.0791297	FALSE	6	1.71038
p6_wJ22	p01	9	21	271741	0.105032	FALSE	4	1.7169
p6_wJ23	p01	9	22	382115	0.0862387	FALSE	1	4.23868
p6_wJ24	p01	9	23	462859	0.0780769	FALSE	1	8.76421
p6_wK1	p01	10	0	421476	0.106899	FALSE	3	2.43509
p6_wK2	p01	10	1	2164914	0.0643895	TRUE	3	57.1863	15802
p6_wK3	p01	10	2	1116330	0.0589745	TRUE	1	66.0806	6074
p6_wK4	p01	10	3	469094	0.0748575	TRUE	1	61.7972	3146
p6_wK5	p01	10	4	616720	0.0770684	TRUE	1	55.8709	1900
p6_wK6	p01	10	5	408648	0.0960415	FALSE	10	1.69284
p6_wK7	p01	10	6	1263614	0.0714924	FALSE	1	5.06879
p6_wK8	p01	10	7	495794	0.100767	FALSE	2	1.9446
p6_wK9	p01	10	8	242498	0.124481	FALSE	8	1.61626
p6_wK10	p01	10	9	1330134	0.0602829	TRUE	1	155.193	10523
p6_wK11	p01	10	10	1073044	0.0564009	TRUE	1	74.2573	8732
p6_wK12	p01	10	11	437821	0.091525	FALSE	8	1.51637
p6_wK13	p01	10	12	561394	0.0871868	FALSE	10	1.38239
p6_wK14	p01	10	13	294069	0.0998994	FALSE	7	1.7249
p6_wK15	p01	10	14	1163652	0.0598133	TRUE	2	135.004	9905
p6_wK16	p01	10	15	169381	0.133917	FALSE	5	1.65574
p6_wK17	p01	10	16	355746	0.099089	FALSE	9	1.61786
p6_wK18	p01	10	17	791454	0.0952632	TRUE	1	40.7773	1584
p6_wK19	p01	10	18	539065	0.0904628	FALSE	1	9.7932
p6_wK20	p01	10	19	192825	0.111233	FALSE	12	1.62099
p6_wK21	p01	10	20	978678	0.0743758	FALSE	5	1.82639
p6_wK22	p01	10	21	289267	0.104775	FALSE	5	1.74016
p6_wK23	p01	10	22	349017	0.0930339	FALSE	6	1.52014
p6_wK24	p01	10	23	397637	0.0861372	FALSE	10	1.55991
p6_wL1	p01	11	0	1499503	0.0630693	TRUE	1	49.9365	9005
p6_wL2	p01	11	1	6089786	0.0574209	TRUE	1	596.51	38050
p6_wL3	p01	11	2	947818	0.116666	TRUE	2	67.0477	4308
p6_wL4	p01	11	3	1504869	0.0610193	TRUE	1	70.2729	9164
p6_wL5	p01	11	4	399860	0.0943538	FALSE	1	6.22896
p6_wL6	p01	11	5	160047	0.158633	FALSE	4	2.66163
p6_wL7	p01	11	6	1895386	0.0511716	TRUE	2	55.9264	11596
p6_wL8	p01	11	7	775915	0.0767875	TRUE	1	66.5767	4919
p6_wL9	p01	11	8	563056	0.0871327	TRUE	1	81.3995	3061
p6_wL10	p01	11	9	1516263	0.0618534	TRUE	3	86.6155	10969
p6_wL11	p01	11	10	1014984	0.0628667	TRUE	1	85.3459	7228
p6_wL12	p01	11	11	837653	0.0621445	TRUE	1	73.5626	5151
p6_wL13	p01	11	12	418727	0.0717302	TRUE	1	15.9754	1676
p6_wL14	p01	11	13	270149	0.110669	FALSE	8	2.08166
p6_wL15	p01	11	14	313575	0.111508	FALSE	7	1.96523
p6_wL16	p01	11	15	1696527	0.070882	TRUE	1	383.988	11013
p6_wL17	p01	11	16	1803309	0.0664178	TRUE	1	196.912	14678
p6_wL18	p01	11	17	229981	0.116044	FALSE	11	1.53301
p6_wL19	p01	11	18	524575	0.0872028	FALSE	8	1.71178
p6_wL20	p01	11	19	514619	0.0943071	TRUE	1	11.8294	798
p6_wL21	p01	11	20	433360	0.101248	FALSE	4	2.19706
p6_wL22	p01	11	21	167328	0.145302	FALSE	5	2.14022
p6_wL23	p01	11	22	632674	0.0784621	TRUE	1	30.9349	3534
p6_wL24	p01	11	23	1309200	0.0527107	TRUE	1	91.0385	8545
p6_wM1	p01	12	0	1789537	0.0574131	TRUE	2	46.6501	12092
p6_wM2	p01	12	1	3455450	0.0505917	TRUE	2	171.445	23436
p6_wM3	p01	12	2	2171027	0.063873	TRUE	1	168.533	9479
p6_wM4	p01	12	3	2511247	0.047928	TRUE	1	118.274	15401
p6_wM5	p01	12	4	288266	0.115747	FALSE	10	1.70618
p6_wM6	p01	12	5	552984	0.0807153	TRUE	2	11.2372	1781
p6_wM7	p01	12	6	859148	0.0911798	TRUE	1	98.532	4971
p6_wM8	p01	12	7	1154249	0.0567567	TRUE	1	126.545	8624
p6_wM9	p01	12	8	2255435	0.0493822	TRUE	1	125.5	15845
p6_wM10	p01	12	9	482897	0.10666	FALSE	9	1.5601
p6_wM11	p01	12	10	433899	0.0982807	FALSE	1	8.94358
p6_wM12	p01	12	11	531440	0.0909513	FALSE	1	1.8471
p6_wM13	p01	12	12	447178	0.0976595	FALSE	5	1.46451
p6_wM14	p01	12	13	227932	0.127027	FALSE	8	1.71828
p6_wM15	p01	12	14	505153	0.0952876	FALSE	8	1.37477
p6_wM16	p01	12	15	385080	0.108275	FALSE	8	1.64269
p6_wM17	p01	12	16	293667	0.114892	FALSE	15	1.54691
p6_wM18	p01	12	17	693704	0.0845359	FALSE	4	1.52651
p6_wM19	p01	12	18	919491	0.0808758	TRUE	1	57.8008	5463
p6_wM20	p01	12	19	331382	0.111338	FALSE	10	1.56797
p6_wM21	p01	12	20	523187	0.083071	TRUE	1	11.0222	1971
p6_wM22	p01	12	21	2422111	0.0538182	TRUE	1	206.941	19002
p6_wM23	p01	12	22	669145	0.0891547	FALSE	11	1.37752
p6_wM24	p01	12	23	1541827	0.0503722	TRUE	1	32.1822	5173
p6_wN1	p01	13	0	5274460	0.0422643	TRUE	1	200.169	27366
p6_wN2	p01	13	1	1975373	0.0716689	TRUE	1	80.5809	16978
p6_wN3	p01	13	2	1085177	0.0841215	TRUE	1	17.2666	2653
p6_wN4	p01	13	3	1325121	0.051102	TRUE	2	28.4917	9600
p6_wN5	p01	13	4	2810988	0.0458991	TRUE	1	289.918	21145
p6_wN6	p01	13	5	2631855	0.0720791	TRUE	1	235.025	10920
p6_wN7	p01	13	6	2200618	0.0484995	TRUE	1	162.543	15082
p6_wN8	p01	13	7	536491	0.0966831	TRUE	1	64.6568	5629
p6_wN9	p01	13	8	3632681	0.0462373	TRUE	1	193.175	27913
p6_wN10	p01	13	9	224983	0.137861	FALSE	9	2.36592
p6_wN11	p01	13	10	1473325	0.0750377	TRUE	1	254.355	8685
p6_wN12	p01	13	11	889608	0.0567813	TRUE	1	133.902	6826
p6_wN13	p01	13	12	311597	0.110633	FALSE	7	2.11068
p6_wN14	p01	13	13	2407683	0.0547549	TRUE	1	372.74	15472
p6_wN15	p01	13	14	668435	0.0706075	TRUE	1	33.388	2682
p6_wN16	p01	13	15	233005	0.129837	FALSE	6	1.98666
p6_wN17	p01	13	16	1347339	0.0546915	TRUE	1	134.441	10297
p6_wN18	p01	13	17	302610	0.106911	FALSE	7	1.86445
p6_wN19	p01	13	18	1416705	0.0508245	TRUE	1	55.8881	7898
p6_wN20	p01	13	19	167962	0.132114	FALSE	8	2.05476
p6_wN21	p01	13	20	516167	0.0890739	FALSE	5	3.06881
p6_wN22	p01	13	21	124336	0.157732	FALSE	8	2.68158
p6_wN23	p01	13	22	1489452	0.0454617	TRUE	1	75.4288	9633
p6_wN24	p01	13	23	880772	0.0482732	TRUE	1	38.7278	4390
p6_wO1	p01	14	0	2644591	0.0546688	TRUE	1	128.519	18078
p6_wO2	p01	14	1	2181345	0.0913901	TRUE	1	258.736	12416
p6_wO3	p01	14	2	1095755	0.0733268	TRUE	1	63.8815	5569
p6_wO4	p01	14	3	4810758	0.0517572	TRUE	1	249.647	17328
p6_wO5	p01	14	4	538671	0.106882	TRUE	1	12.9001	1179
p6_wO6	p01	14	5	286150	0.110135	FALSE	3	5.73262
p6_wO7	p01	14	6	590843	0.10145	FALSE	11	2.10868
p6_wO8	p01	14	7	920064	0.0760426	TRUE	1	92.1645	5607
p6_wO9	p01	14	8	408445	0.128584	FALSE	12	1.73623
p6_wO10	p01	14	9	2170125	0.0905731	TRUE	1	158.346
p6_wO11	p01	14	10	1866146	0.0631054	TRUE	1	174.607	18629
p6_wO12	p01	14	11	357312	0.118796	FALSE	11	1.52985
p6_wO13	p01	14	12	2089711	0.0558687	TRUE	1	121.279	14707
p6_wO14	p01	14	13	917829	0.0929204	TRUE	1	257.942	9329
p6_wO15	p01	14	14	2060126	0.0620804	TRUE	1	171.768	14288
p6_wO16	p01	14	15	473189	0.0955917	FALSE	1	5.75498
p6_wO17	p01	14	16	662928	0.094188	FALSE	11	1.62352
p6_wO18	p01	14	17	209800	0.118099	FALSE	10	1.6491
p6_wO19	p01	14	18	2659107	0.0743373	TRUE	1	160.164	18401
p6_wO20	p01	14	19	1501497	0.0774968	TRUE	2	118.373	8816
p6_wO21	p01	14	20	3580919	0.0574029	TRUE	2	132.737	21228
p6_wO22	p01	14	21	408400	0.0934581	TRUE	1	28.649	1665
p6_wO23	p01	14	22	715964	0.0916956	FALSE	11	1.47467
p6_wO24	p01	14	23	817507	0.0798548	FALSE	9	1.46344
p6_wP1	p01	15	0	1981797	0.0612694	TRUE	1	142.624	11391
p6_wP2	p01	15	1	2571816	0.0846333	TRUE	1	120.13	18582
p6_wP3	p01	15	2	846572	0.0681057	TRUE	1	50.0562	6288
p6_wP4	p01	15	3	2843516	0.0572308	TRUE	1	145.027	22248
p6_wP5	p01	15	4	1789540	0.059397	TRUE	2	90.2913	12641
p6_wP6	p01	15	5	4928505	0.0548805	TRUE	1	583.142	28457
p6_wP7	p01	15	6	5879144	0.0522716	TRUE	1	368.52	32651
p6_wP8	p01	15	7	3968693	0.0639604	TRUE	1	373.612	16667
p6_wP9	p01	15	8	2931309	0.0687094	TRUE	1	190.882	16409
p6_wP10	p01	15	9	250241	0.149484	FALSE	8	2.20345
p6_wP11	p01	15	10	1237165	0.0724006	TRUE	1	102.835	11916
p6_wP12	p01	15	11	907002	0.0794658	TRUE	1	27.6074	4995
p6_wP13	p01	15	12	507654	0.0757788	TRUE	1	41.8527	2761
p6_wP14	p01	15	13	1258204	0.0706347	TRUE	1	147.495	10261
p6_wP15	p01	15	14	2993724	0.0563743	TRUE	1	236.666
p6_wP16	p01	15	15	586701	0.0774321	TRUE	2	18.4942	3262
p6_wP17	p01	15	16	1356181	0.0565572	TRUE	1	123.966	13096
p6_wP18	p01	15	17	313151	0.114908	FALSE	3	1.96377
p6_wP19	p01	15	18	397478	0.105214	FALSE	1	6.15802
p6_wP20	p01	15	19	516421	0.0901008	TRUE	1	61.7243	2520
p6_wP21	p01	15	20	2609852	0.0656501	TRUE	2	34.8201	14216
p6_wP22	p01	15	21	567618	0.0992657	FALSE	11	1.70064
p6_wP23	p01	15	22	2269426	0.0548658	TRUE	2	75.9104	16419
p6_wP24	p01	15	23	2108794	0.0494259	TRUE	1	58.3592	8018
A1_1chr_p26	p26	0	0	609306	0.0586539	TRUE	4	12.7923	4587
A2_1chr_p26	p26	0	1	335849	0.0668295	TRUE	1	56.6969	3333
A3_1chr_p26	p26	0	2	74307	0.103783	FALSE	10	1.63299
A4_1chr_p26	p26	0	3	60678	0.127494	FALSE	15	1.82892
A5_1chr_p26	p26	0	4	181778	0.141309	FALSE	9	1.56052
A6_1chr_p26	p26	0	5	4626520	0.052893	TRUE	3	93.2004	26005
A7_1chr_p26	p26	0	6	72786	0.186838	FALSE	6	2.23056
A8_1chr_p26	p26	0	7	995096	0.0443452	TRUE	1	134.439	6187
A9_1chr_p26	p26	0	8	477539	0.0581583	TRUE	1	39.7557	4948
A10_1chr_p26	p26	0	9	67926	0.347751	FALSE	8	1.61788
A11_1chr_p26	p26	0	10	225558	0.134805	TRUE	1	90.6466	1546
A12_1chr_p26	p26	0	11	490598	0.0533015	TRUE	1	81.0255	4200
A13_1chr_p26	p26	0	12	582823	0.0667346	TRUE	1	61.1918	5029
A14_1chr_p26	p26	0	13	4238270	0.0421556	TRUE	7	168.226	29287
A15_1chr_p26	p26	0	14	26876	0.448681	FALSE	6	2.54882
A16_1chr_p26	p26	0	15	29320	0.282209	FALSE	4	3.08177
A17_1chr_p26	p26	0	16	53949	0.224824	FALSE	7	1.71464
A18_1chr_p26	p26	0	17	43828	0.122016	FALSE	12	2.09474
A19_1chr_p26	p26	0	18	47571	0.216472	FALSE	13	2.14202
A20_1chr_p26	p26	0	19	37710	0.13104	FALSE	10	2.25379
A21_1chr_p26	p26	0	20	26172	0.14094	FALSE	2	2.79067
A22_1chr_p26	p26	0	21	21458	0.185924	FALSE	7	3.19936
A23_1chr_p26	p26	0	22	26353	0.122087	FALSE	6	3.5593
A24_1chr_p26	p26	0	23	27092	0.180997	FALSE	10	2.60043
B1_1chr_p26	p26	1	0	216544	0.0969047	FALSE	8	1.58762
B2_1chr_p26	p26	1	1	250265	0.118417	FALSE	9	1.23835
B3_1chr_p26	p26	1	2	1162725	0.0400308	TRUE	1	178.453	6435
B4_1chr_p26	p26	1	3	1067455	0.0493162	TRUE	2	103.111	8361
B5_1chr_p26	p26	1	4	711112	0.0610419	TRUE	2	75.4723	5346
B6_1chr_p26	p26	1	5	28129	0.345722	FALSE	12	2.76654
B7_1chr_p26	p26	1	6	1060459	0.0454982	TRUE	2	97.7542	7063
B8_1chr_p26	p26	1	7	364080	0.056878	TRUE	1	216.674	2849
B9_1chr_p26	p26	1	8	69270	0.304703	FALSE	8	2.29665
B10_1chr_p26	p26	1	9	916544	0.0523039	TRUE	3	51.7861	7705
B11_1chr_p26	p26	1	10	52506	0.118278	FALSE	12	2.78319
B12_1chr_p26	p26	1	11	3118043	0.0410888	TRUE	6	91.0962	22692
B13_1chr_p26	p26	1	12	30221	0.317684	FALSE	8	3.56248
B14_1chr_p26	p26	1	13	37617	0.229171	FALSE	9	2.8958
B15_1chr_p26	p26	1	14	676074	0.0520489	TRUE	1	122.421	7041
B16_1chr_p26	p26	1	15	47259	0.23896	FALSE	9	1.61603
B17_1chr_p26	p26	1	16	383758	0.0582966	TRUE	1	31.1529	3900
B18_1chr_p26	p26	1	17	1073414	0.0441787	TRUE	1	126.256	8609
B19_1chr_p26	p26	1	18	49117	0.16162	FALSE	8	2.21314
B20_1chr_p26	p26	1	19	296111	0.0758096	TRUE	1	96.2315	2078
B21_1chr_p26	p26	1	20	22738	0.121274	FALSE	15	2.23847
B22_1chr_p26	p26	1	21	347558	0.0583928	TRUE	1	50.2297	3288
B23_1chr_p26	p26	1	22	19599	0.159249	FALSE	7	2.79415
B24_1chr_p26	p26	1	23	12802	0.303755	FALSE	12	3.18556
C1_1chr_p26	p26	2	0	832103	0.0721035	FALSE	5	6.27137
C2_1chr_p26	p26	2	1	372346	0.0839405	TRUE	1	52.6005	3191
C3_1chr_p26	p26	2	2	638714	0.0550682	TRUE	2	91.0761	5068
C4_1chr_p26	p26	2	3	76072	0.177758	FALSE	5	1.94162
C5_1chr_p26	p26	2	4	74678	0.222286	FALSE	3	1.55934
C6_1chr_p26	p26	2	5	660699	0.0667376	TRUE	1	28.2827	7732
C7_1chr_p26	p26	2	6	65651	0.285435	FALSE	12	1.71031
C8_1chr_p26	p26	2	7	60284	0.199297	FALSE	10	1.73236
C9_1chr_p26	p26	2	8	22519804	0.0541047	FALSE	17	1.51064
C10_1chr_p26	p26	2	9	73287	0.495639	FALSE	8	1.55119
C11_1chr_p26	p26	2	10	179409	0.137873	FALSE	10	1.65552
C12_1chr_p26	p26	2	11	9015194	0.0443125	FALSE	5	2.24063
C13_1chr_p26	p26	2	12	15080879	0.0492458	FALSE	12	2.93541
C14_1chr_p26	p26	2	13	1001841	0.0542377	TRUE	2	53.3056	9332
C15_1chr_p26	p26	2	14	37899	0.73534	FALSE	8	1.54294
C16_1chr_p26	p26	2	15	1367870	0.0445376	TRUE	2	34.4728	8045
C17_1chr_p26	p26	2	16	64523	0.250326	FALSE	11	1.57536
C18_1chr_p26	p26	2	17	988427	0.052176	TRUE	3	48.9189	8257
C19_1chr_p26	p26	2	18	779998	0.0690927	TRUE	1	36.3096	6461
C20_1chr_p26	p26	2	19	902705	0.046307	TRUE	1	119.242	7060
C21_1chr_p26	p26	2	20	198013	0.058613	TRUE	1	94.2271	1636
C22_1chr_p26	p26	2	21	66663	0.115941	FALSE	5	1.65573
C23_1chr_p26	p26	2	22	15103	0.313403	FALSE	6	2.34617
C24_1chr_p26	p26	2	23	26699	0.381226	FALSE	10	1.50964
D1_1chr_p26	p26	3	0	73380	0.150798	FALSE	2	2.84386
D2_1chr_p26	p26	3	1	168797	0.112736	TRUE	2	63.8494	2467
D3_1chr_p26	p26	3	2	52285	0.127152	FALSE	12	1.89524
D4_1chr_p26	p26	3	3	51849	0.127734	FALSE	11	1.7282
D5_1chr_p26	p26	3	4	1779852	0.0446337	TRUE	3	78.1819	12987
D6_1chr_p26	p26	3	5	337800	0.0703276	TRUE	1	65.2895	4012
D7_1chr_p26	p26	3	6	59245	0.143003	FALSE	10	1.87973
D8_1chr_p26	p26	3	7	95448	0.140864	FALSE	10	1.55471
D9_1chr_p26	p26	3	8	52768	0.327844	FALSE	2	3.04634
D10_1chr_p26	p26	3	9	649016	0.0509703	TRUE	1	64.0338	6212
D11_1chr_p26	p26	3	10	205799	0.0799761	TRUE	1	139.224	1783
D12_1chr_p26	p26	3	11	75500	0.158521	FALSE	8	1.67802
D13_1chr_p26	p26	3	12	715304	0.0435561	TRUE	1	109.721	5268
D14_1chr_p26	p26	3	13	1666770	0.0462762	TRUE	3	189.957	15176
D15_1chr_p26	p26	3	14	25008	0.403857	FALSE	4	3.23542
D16_1chr_p26	p26	3	15	309111	0.0592489	TRUE	1	148.372	3785
D17_1chr_p26	p26	3	16	1102227	0.0500756	TRUE	2	71.4747	9051
D18_1chr_p26	p26	3	17	75984	0.116426	FALSE	11	1.41621
D19_1chr_p26	p26	3	18	778458	0.0401931	TRUE	1	114.001	5235
D20_1chr_p26	p26	3	19	155778	0.0779248	TRUE	1	40.0512	1433
D21_1chr_p26	p26	3	20	19422	0.188865	FALSE	5	4.3609
D22_1chr_p26	p26	3	21	619776	0.0672913	TRUE	2	174.968	6834
D23_1chr_p26	p26	3	22	13960	0.255569	FALSE	11	3.20456
D24_1chr_p26	p26	3	23	595643	0.0377671	TRUE	1	181.821	5025
E1_1chr_p26	p26	4	0	134506	0.160232	FALSE	5	2.0016
E2_1chr_p26	p26	4	1	59459	0.185614	FALSE	3	2.1089
E3_1chr_p26	p26	4	2	216132	0.0923263	TRUE	1	87.4372	1648
E4_1chr_p26	p26	4	3	232028	0.0831827	TRUE	1	145.538	2349
E5_1chr_p26	p26	4	4	82751	0.123443	FALSE	8	1.9028
E6_1chr_p26	p26	4	5	146493	0.162184	FALSE	2	1.864
E7_1chr_p26	p26	4	6	52972	0.140942	FALSE	11	2.32943
E8_1chr_p26	p26	4	7	577498	0.0531434	TRUE	1	161.239	4376
E9_1chr_p26	p26	4	8	894582	0.0501527	TRUE	1	74.1675	6564
E10_1chr_p26	p26	4	9	1594108	0.0543502	TRUE	3	28.919	11115
E11_1chr_p26	p26	4	10	450167	0.0572175	TRUE	1	174.835	5311
E12_1chr_p26	p26	4	11	53199	0.160859	FALSE	5	1.97848
E13_1chr_p26	p26	4	12	1280490	0.0428812	TRUE	1	187.516	9007
E14_1chr_p26	p26	4	13	25411	0.21685	FALSE	9	3.65988
E15_1chr_p26	p26	4	14	20618	0.440458	FALSE	10	3.162
E16_1chr_p26	p26	4	15	145388	0.0667746	TRUE	1	117.405	1290
E17_1chr_p26	p26	4	16	302439	0.0627452	TRUE	1	94.6403	2661
E18_1chr_p26	p26	4	17	29383	0.143182	FALSE	5	2.62708
E19_1chr_p26	p26	4	18	89379	0.14652	FALSE	12	1.64022
E20_1chr_p26	p26	4	19	52877	0.101431	FALSE	3	2.35876
E21_1chr_p26	p26	4	20	15580	0.312571	FALSE	8	1.44712
E22_1chr_p26	p26	4	21	46098	0.20728	FALSE	2	9.57689
E23_1chr_p26	p26	4	22	66239	0.104053	TRUE	1	12.8347	978
E24_1chr_p26	p26	4	23	16131	0.201413	FALSE	4	2.69059
F1_1chr_p26	p26	5	0	506209	0.0709488	TRUE	1	27.7016	4846
F2_1chr_p26	p26	5	1	1017117	0.061381	TRUE	5	89.5743	13261
F3_1chr_p26	p26	5	2	52693	0.146188	FALSE	5	1.79491
F4_1chr_p26	p26	5	3	520005	0.0510827	TRUE	1	66.5364	4052
F5_1chr_p26	p26	5	4	1753281	0.0478629	TRUE	4	59.9503	15754
F6_1chr_p26	p26	5	5	515220	0.0671327	TRUE	1	48.2921	6907
F7_1chr_p26	p26	5	6	486948	0.0641674	TRUE	1	102.382	4433
F8_1chr_p26	p26	5	7	237537	0.0542223	TRUE	1	103.77	1881
F9_1chr_p26	p26	5	8	812921	0.0651739	TRUE	2	18.4943	6898
F10_1chr_p26	p26	5	9	305717	0.0955915	TRUE	1	37.258	4597
F11_1chr_p26	p26	5	10	925562	0.0441317	TRUE	1	178.459	6368
F12_1chr_p26	p26	5	11	31617	0.404266	FALSE	5	1.8271
F13_1chr_p26	p26	5	12	81357	0.380936	FALSE	4	1.86625
F14_1chr_p26	p26	5	13	519214	0.0633492	TRUE	1	114.597	4595
F15_1chr_p26	p26	5	14	1000944	0.0503413	TRUE	1	100.177	11051
F16_1chr_p26	p26	5	15	224597	0.090202	TRUE	1	67.1641	2754
F17_1chr_p26	p26	5	16	8304173	0.0504478	FALSE	12	1.99299
F18_1chr_p26	p26	5	17	495005	0.0479657	TRUE	1	96.9367	4309
F19_1chr_p26	p26	5	18	57775	0.181935	FALSE	2	2.08903
F20_1chr_p26	p26	5	19	27862	0.164911	FALSE	6	2.38649
F21_1chr_p26	p26	5	20	16342	0.183909	FALSE	9	2.25452
F22_1chr_p26	p26	5	21	21732	0.208955	FALSE	9	2.3226
F23_1chr_p26	p26	5	22	501692	0.0363009	TRUE	1	128.771	3796
F24_1chr_p26	p26	5	23	251097	0.070512	TRUE	1	31.7389	2032
G1_1chr_p26	p26	6	0	86372	0.394783	FALSE	10	1.48514
G2_1chr_p26	p26	6	1	89536	0.234135	FALSE	7	1.29623
G3_1chr_p26	p26	6	2	60195	0.227469	FALSE	14	1.69308
G4_1chr_p26	p26	6	3	61523	0.20464	FALSE	6	1.58555
G5_1chr_p26	p26	6	4	154335	0.245757	FALSE	11	1.45596
G6_1chr_p26	p26	6	5	9504225	0.0553896	FALSE	17	1.54638
G7_1chr_p26	p26	6	6	557181	0.0659087	TRUE	1	46.4135	5707
G8_1chr_p26	p26	6	7	49409	0.260695	FALSE	7	1.41445
G9_1chr_p26	p26	6	8	3670894	0.0531226	TRUE	6	20.4479	32674
G10_1chr_p26	p26	6	9	842035	0.0687459	TRUE	1	36.8596	9118
G11_1chr_p26	p26	6	10	405914	0.0622046	TRUE	2	49.3378	3497
G12_1chr_p26	p26	6	11	860562	0.0558207	TRUE	1	50.866	5789
G13_1chr_p26	p26	6	12	430648	0.113128	TRUE	1	28.5928	8651
G14_1chr_p26	p26	6	13	571802	0.0491456	TRUE	1	57.298	5588
G15_1chr_p26	p26	6	14	13950020	0.0575602	FALSE	15	1.51436
G16_1chr_p26	p26	6	15	569137	0.0615297	TRUE	4	16.0759	6709
G17_1chr_p26	p26	6	16	49596	0.287824	FALSE	4	1.53287
G18_1chr_p26	p26	6	17	36824	0.324277	FALSE	11	2.18791
G19_1chr_p26	p26	6	18	11378025	0.0488437	FALSE	15	1.73895
G20_1chr_p26	p26	6	19	31413	0.218614	FALSE	6	2.90778
G21_1chr_p26	p26	6	20	488239	0.0695428	TRUE	1	79.7163	3670
G22_1chr_p26	p26	6	21	106785	0.0882428	TRUE	1	28.4896	1459
G23_1chr_p26	p26	6	22	14989	0.371663	FALSE	6	2.86304
G24_1chr_p26	p26	6	23	22468	0.531665	FALSE	13	1.58257
H1_1chr_p26	p26	7	0	72952	0.168714	FALSE	9	1.72942
H2_1chr_p26	p26	7	1	197347	0.122847	TRUE	1	122.473	2754
H3_1chr_p26	p26	7	2	497981	0.0472015	TRUE	1	150.7	4357
H4_1chr_p26	p26	7	3	135058	0.0842461	TRUE	1	48.1431	1140
H5_1chr_p26	p26	7	4	377624	0.0558943	TRUE	2	40.9681	2252
H6_1chr_p26	p26	7	5	61323	0.206193	FALSE	9	2.00495
H7_1chr_p26	p26	7	6	64373	0.151347	FALSE	3	2.15928
H8_1chr_p26	p26	7	7	649315	0.0566036	TRUE	2	254.852	5626
H9_1chr_p26	p26	7	8	44910	0.324353	FALSE	10	2.1655
H10_1chr_p26	p26	7	9	941898	0.0530211	TRUE	1	148.987	9953
H11_1chr_p26	p26	7	10	37106	0.15695	FALSE	8	2.9884
H12_1chr_p26	p26	7	11	18188	0.384505	FALSE	12	2.91964
H13_1chr_p26	p26	7	12	228352	0.0664804	TRUE	1	37.4836	2329
H14_1chr_p26	p26	7	13	719013	0.0676555	TRUE	2	118.837	10482
H15_1chr_p26	p26	7	14	23578	0.42801	FALSE	7	2.6692
H16_1chr_p26	p26	7	15	777201	0.0524563	TRUE	2	92.9451	6825
H17_1chr_p26	p26	7	16	2032940	0.0533342	TRUE	8	60.021	17293
H18_1chr_p26	p26	7	17	383285	0.0496558	TRUE	1	113.621	3366
H19_1chr_p26	p26	7	18	724325	0.0398824	TRUE	1	141.449	5317
H20_1chr_p26	p26	7	19	595521	0.0493564	TRUE	1	78.6657	6478
H21_1chr_p26	p26	7	20	19922	0.154488	FALSE	1	6.52788
H22_1chr_p26	p26	7	21	16873	0.165666	FALSE	12	2.12198
H23_1chr_p26	p26	7	22	12040	0.255703	FALSE	8	3.86649
H24_1chr_p26	p26	7	23	21353	0.265057	FALSE	14	1.6924
I1_1chr_p26	p26	8	0	86393	0.276888	FALSE	6	1.40211
I2_1chr_p26	p26	8	1	108322	0.180745	FALSE	11	1.3579
I3_1chr_p26	p26	8	2	1011150	0.0582874	TRUE	2	57.1912	7969
I4_1chr_p26	p26	8	3	306349	0.0531153	TRUE	1	86.0473	2474
I5_1chr_p26	p26	8	4	2030823	0.0460599	TRUE	3	63.6868	16406
I6_1chr_p26	p26	8	5	64943	0.372041	FALSE	13	1.66312
I7_1chr_p26	p26	8	6	61243	0.223201	FALSE	5	1.7881
I8_1chr_p26	p26	8	7	1094693	0.0595762	TRUE	1	88.4645	8676
I9_1chr_p26	p26	8	8	575114	0.0900305	TRUE	1	16.7876	8638
I10_1chr_p26	p26	8	9	76864	0.435316	FALSE	1	1.59142
I11_1chr_p26	p26	8	10	28120	0.274979	FALSE	9	1.81957
I12_1chr_p26	p26	8	11	544078	0.0830259	TRUE	1	37.2288	5537
I13_1chr_p26	p26	8	12	123843	0.284723	FALSE	1	7.58722
I14_1chr_p26	p26	8	13	240300	0.100714	TRUE	1	75.9615	2969
I15_1chr_p26	p26	8	14	10661515	0.049027	FALSE	8	1.70716
I16_1chr_p26	p26	8	15	10071998	0.0700723	FALSE	5	1.77994
I17_1chr_p26	p26	8	16	1401552	0.0565862	TRUE	2	67.6727	13483
I18_1chr_p26	p26	8	17	33416	0.256152	FALSE	13	1.80843
I19_1chr_p26	p26	8	18	596247	0.0619101	FALSE	10	1.38164
I20_1chr_p26	p26	8	19	1084877	0.0448309	TRUE	2	97.4785	8334
I21_1chr_p26	p26	8	20	17720	0.256468	FALSE	2	2.68896
I22_1chr_p26	p26	8	21	1007601	0.0503347	TRUE	1	272.871	4786
I23_1chr_p26	p26	8	22	18927	0.23491	FALSE	9	1.58426
I24_1chr_p26	p26	8	23	1340328	0.0526225	TRUE	5	22.8967	11586
J1_1chr_p26	p26	9	0	214303	0.141366	FALSE	8	1.55745
J2_1chr_p26	p26	9	1	55178	0.237849	FALSE	3	1.94047
J3_1chr_p26	p26	9	2	46863	0.170118	FALSE	11	1.76155
J4_1chr_p26	p26	9	3	59710	0.14772	FALSE	11	1.66898
J5_1chr_p26	p26	9	4	910500	0.0485133	TRUE	1	94.3656	7101
J6_1chr_p26	p26	9	5	365007	0.0677222	TRUE	1	22.3567	3995
J7_1chr_p26	p26	9	6	9206551	0.0516831	FALSE	5	2.37956
J8_1chr_p26	p26	9	7	260069	0.0681254	TRUE	1	49.0136	2642
J9_1chr_p26	p26	9	8	690522	0.070015	TRUE	1	55.2566	6790
J10_1chr_p26	p26	9	9	353512	0.0989828	TRUE	1	43.6598	3443
J11_1chr_p26	p26	9	10	87400	0.24233	TRUE	1	14.1538	1018
J12_1chr_p26	p26	9	11	456139	0.0587795	TRUE	1	77.8461	3043
J13_1chr_p26	p26	9	12	2310072	0.0512443	TRUE	3	64.9084	18866
J14_1chr_p26	p26	9	13	26107	0.417639	FALSE	14	2.07135
J15_1chr_p26	p26	9	14	667612	0.0590789	TRUE	1	66.6749	7735
J16_1chr_p26	p26	9	15	26859	0.418613	FALSE	2	1.55152
J17_1chr_p26	p26	9	16	729683	0.0657842	TRUE	1	70.6271	6273
J18_1chr_p26	p26	9	17	431411	0.0526311	TRUE	1	56.6635	4862
J19_1chr_p26	p26	9	18	37195	0.262262	FALSE	9	1.9895
J20_1chr_p26	p26	9	19	35515	0.146973	FALSE	14	2.04109
J21_1chr_p26	p26	9	20	211414	0.069347	TRUE	1	95.3529	1773
J22_1chr_p26	p26	9	21	327516	0.0563876	TRUE	1	117.916	3393
J23_1chr_p26	p26	9	22	625617	0.047299	TRUE	1	205.795	5095
J24_1chr_p26	p26	9	23	6578786	0.0396269	FALSE	15	55.4228
K1_1chr_p26	p26	10	0	580687	0.0608006	TRUE	1	78.7608	4950
K2_1chr_p26	p26	10	1	161254	0.151924	FALSE	3	1.81386
K3_1chr_p26	p26	10	2	64751	0.148077	FALSE	13	1.56227
K4_1chr_p26	p26	10	3	48121	0.139151	FALSE	16	2.00735
K5_1chr_p26	p26	10	4	268025	0.0551429	TRUE	1	117.555	2003
K6_1chr_p26	p26	10	5	39945	0.227527	FALSE	2	3.19184
K7_1chr_p26	p26	10	6	479736	0.0583915	TRUE	1	191.642	5918
K8_1chr_p26	p26	10	7	575093	0.0562813	TRUE	1	75.2974	6339
K9_1chr_p26	p26	10	8	67338	0.221685	FALSE	3	3.22625
K10_1chr_p26	p26	10	9	88495	0.203102	FALSE	2	3.83593
K11_1chr_p26	p26	10	10	29833	0.173074	FALSE	14	2.61911
K12_1chr_p26	p26	10	11	185852	0.107233	TRUE	1	30.3012	1474
K13_1chr_p26	p26	10	12	75251	0.24329	FALSE	8	2.77484
K14_1chr_p26	p26	10	13	20565	0.247581	FALSE	3	2.97386
K15_1chr_p26	p26	10	14	1063725	0.0610683	TRUE	2	209.868	10617
K16_1chr_p26	p26	10	15	458974	0.0471346	TRUE	1	320.71	3883
K17_1chr_p26	p26	10	16	19735	0.296442	FALSE	2	3.36476
K18_1chr_p26	p26	10	17	2476740	0.0492652	TRUE	8	143.374	23968
K19_1chr_p26	p26	10	18	37304	0.221304	FALSE	7	2.17067
K20_1chr_p26	p26	10	19	48459	0.137748	FALSE	7	1.79259
K21_1chr_p26	p26	10	20	583748	0.0402417	TRUE	1	376.644	4365
K22_1chr_p26	p26	10	21	167807	0.0746469	TRUE	1	265.212	1781
K23_1chr_p26	p26	10	22	1079570	0.0395965	TRUE	1	322.004	7808
K24_1chr_p26	p26	10	23	40597	0.148781	FALSE	6	2.03804
L1_1chr_p26	p26	11	0	58185	0.214365	FALSE	6	1.89207
L2_1chr_p26	p26	11	1	38128	0.188365	FALSE	4	1.80362
L3_1chr_p26	p26	11	2	45164	0.143038	FALSE	14	1.46794
L4_1chr_p26	p26	11	3	218757	0.1066	TRUE	1	50.3353	1796
L5_1chr_p26	p26	11	4	605357	0.0483215	TRUE	1	57.4737	4090
L6_1chr_p26	p26	11	5	57225	0.255968	FALSE	12	1.74367
L7_1chr_p26	p26	11	6	251440	0.0804408	TRUE	1	84.049	2454
L8_1chr_p26	p26	11	7	195984	0.0793107	TRUE	1	19.6951	1657
L9_1chr_p26	p26	11	8	59743	0.264532	FALSE	4	2.04937
L10_1chr_p26	p26	11	9	331687	0.0595321	TRUE	1	99.798	2317
L11_1chr_p26	p26	11	10	204602	0.0704739	TRUE	1	61.5586	2204
L12_1chr_p26	p26	11	11	44399	0.178762	FALSE	8	2.4006
L13_1chr_p26	p26	11	12	1780290	0.0458665	TRUE	2	120.369	12904
L14_1chr_p26	p26	11	13	413524	0.0700366	TRUE	1	103.572	3218
L15_1chr_p26	p26	11	14	618601	0.0615276	TRUE	1	185.091	6281
L16_1chr_p26	p26	11	15	16174	0.316533	FALSE	9	2.83505
L17_1chr_p26	p26	11	16	23171	0.215158	FALSE	8	2.53781
L18_1chr_p26	p26	11	17	22944	0.170307	FALSE	5	2.73491
L19_1chr_p26	p26	11	18	43539	0.167814	FALSE	1	2.81539
L20_1chr_p26	p26	11	19	56058	0.145692	FALSE	11	1.6151
L21_1chr_p26	p26	11	20	449713	0.0436934	TRUE	1	58.2904	3815
L22_1chr_p26	p26	11	21	20138	0.225236	FALSE	6	2.7562
L23_1chr_p26	p26	11	22	889673	0.110468	FALSE	4	8.54073
L24_1chr_p26	p26	11	23	1378265	0.0518124	TRUE	4	29.1562	11208
M1_1chr_p26	p26	12	0	14320762	0.0418343	FALSE	10	1.49561
M2_1chr_p26	p26	12	1	74826	0.258803	FALSE	10	1.53821
M3_1chr_p26	p26	12	2	51913	0.208453	FALSE	10	1.53241
M4_1chr_p26	p26	12	3	685291	0.0476395	TRUE	1	94.2316	4419
M5_1chr_p26	p26	12	4	66469	0.197391	FALSE	9	1.62912
M6_1chr_p26	p26	12	5	73450	0.277056	FALSE	9	1.79418
M7_1chr_p26	p26	12	6	549008	0.045578	TRUE	1	136.688	3931
M8_1chr_p26	p26	12	7	170959	0.0987125	TRUE	1	20.3356	2033
M9_1chr_p26	p26	12	8	668206	0.0645858	TRUE	1	39.0638	6625
M10_1chr_p26	p26	12	9	713500	0.0552224	TRUE	1	55.766	6876
M11_1chr_p26	p26	12	10	36309	0.219371	FALSE	3	2.05607
M12_1chr_p26	p26	12	11	45917	0.374967	FALSE	9	1.57589
M13_1chr_p26	p26	12	12	1662718	0.0536492	TRUE	2	56.0569	14018
M14_1chr_p26	p26	12	13	59174	0.268275	FALSE	5	1.89642
M15_1chr_p26	p26	12	14	57147	0.332864	FALSE	2	3.03356
M16_1chr_p26	p26	12	15	291662	0.0650717	TRUE	1	114.984	2757
M17_1chr_p26	p26	12	16	69219	0.316284	FALSE	10	1.72877
M18_1chr_p26	p26	12	17	905772	0.0482932	TRUE	2	109.302	7735
M19_1chr_p26	p26	12	18	37356	0.290246	FALSE	8	1.7309
M20_1chr_p26	p26	12	19	116078	0.163785	FALSE	2	4.40739
M21_1chr_p26	p26	12	20	565579	0.0684473	TRUE	1	211.991	3755
M22_1chr_p26	p26	12	21	596202	0.0503741	TRUE	1	159.17	4661
M23_1chr_p26	p26	12	22	22559	0.219149	FALSE	8	1.94928
M24_1chr_p26	p26	12	23	27121	0.412566	FALSE	5	1.52488
N1_1chr_p26	p26	13	0	83092	0.380596	FALSE	4	1.68079
N2_1chr_p26	p26	13	1	45923	0.353026	FALSE	9	1.44289
N3_1chr_p26	p26	13	2	170573	0.153119	FALSE	12	1.67631
N4_1chr_p26	p26	13	3	150794	0.173053	FALSE	1	1.93644
N5_1chr_p26	p26	13	4	72624	0.233929	FALSE	9	1.68037
N6_1chr_p26	p26	13	5	8065485	0.0455243	FALSE	13	32.5369
N7_1chr_p26	p26	13	6	737153	0.0520153	TRUE	1	54.369	6983
N8_1chr_p26	p26	13	7	35398	0.329534	FALSE	5	1.78686
N9_1chr_p26	p26	13	8	183459	0.389258	FALSE	6	1.62057
N10_1chr_p26	p26	13	9	28600534	0.0726256	FALSE	8	1.58544
N11_1chr_p26	p26	13	10	764027	0.0469734	TRUE	1	129.573	6904
N12_1chr_p26	p26	13	11	409999	0.113743	TRUE	1	30.8254	3082
N13_1chr_p26	p26	13	12	152158	0.179255	TRUE	1	10.6542	3903
N14_1chr_p26	p26	13	13	41324	0.484418	FALSE	12	1.70598
N15_1chr_p26	p26	13	14	278543	0.14039	TRUE	1	23.8494	5981
N16_1chr_p26	p26	13	15	570781	0.0653017	TRUE	1	31.1537	3131
N17_1chr_p26	p26	13	16	1014813	0.0577591	TRUE	2	57.6674	10785
N18_1chr_p26	p26	13	17	456174	0.0718611	TRUE	1	24.9524	3555
N19_1chr_p26	p26	13	18	1057606	0.0539486	TRUE	3	24.7145	8372
N20_1chr_p26	p26	13	19	27372	0.226054	FALSE	7	2.26072
N21_1chr_p26	p26	13	20	222433	0.0693402	TRUE	1	47.1864	2599
N22_1chr_p26	p26	13	21	569625	0.067175	TRUE	3	77.1698	7492
N23_1chr_p26	p26	13	22	17785	0.288144	FALSE	15	2.32286
N24_1chr_p26	p26	13	23	27911	0.356935	FALSE	10	1.82517
O1_1chr_p26	p26	14	0	127765	0.17055	FALSE	3	1.8149
O2_1chr_p26	p26	14	1	72525	0.141744	FALSE	3	1.54123
O3_1chr_p26	p26	14	2	55303	0.186182	FALSE	6	1.97942
O4_1chr_p26	p26	14	3	347514	0.0562281	TRUE	1	57.9915	3043
O5_1chr_p26	p26	14	4	50861	0.214593	FALSE	9	1.82193
O6_1chr_p26	p26	14	5	104158	0.287456	FALSE	1	2.30197
O7_1chr_p26	p26	14	6	355909	0.056632	TRUE	1	115.261	2654
O8_1chr_p26	p26	14	7	44202	0.178909	FALSE	5	1.97803
O9_1chr_p26	p26	14	8	12769567	0.0500026	FALSE	16	2.05581
O10_1chr_p26	p26	14	9	50475	0.391401	FALSE	16	1.59348
O11_1chr_p26	p26	14	10	624975	0.0678328	TRUE	3	99.1088	6992
O12_1chr_p26	p26	14	11	362508	0.0658167	TRUE	1	58.4868	3751
O13_1chr_p26	p26	14	12	745546	0.0604084	TRUE	1	84.2826	8183
O14_1chr_p26	p26	14	13	509699	0.052374	TRUE	1	104.638	3909
O15_1chr_p26	p26	14	14	67740	0.274352	FALSE	1	7.97205
O16_1chr_p26	p26	14	15	34145	0.274695	FALSE	1	2.3503
O17_1chr_p26	p26	14	16	26899	0.333478	FALSE	5	2.19712
O18_1chr_p26	p26	14	17	37862	0.165091	FALSE	7	1.93793
O19_1chr_p26	p26	14	18	738833	0.0517202	TRUE	1	116.699	7662
O20_1chr_p26	p26	14	19	33863	0.141731	FALSE	9	1.85654
O21_1chr_p26	p26	14	20	22279	0.153191	FALSE	2	2.68823
O22_1chr_p26	p26	14	21	17323	0.197	FALSE	9	2.0069
O23_1chr_p26	p26	14	22	165844	0.167833	TRUE	1	152.666	1158
O24_1chr_p26	p26	14	23	63280	0.321587	FALSE	9	1.47804
P1_1chr_p26	p26	15	0	45279	0.290877	FALSE	5	1.98682
P2_1chr_p26	p26	15	1	13242	0.475876	FALSE	3	2.25724
P3_1chr_p26	p26	15	2	286960	0.0663989	TRUE	2	37.2118	2175
P4_1chr_p26	p26	15	3	158722	0.155149	FALSE	3	1.64032
P5_1chr_p26	p26	15	4	69408	0.133806	FALSE	4	2.06606
P6_1chr_p26	p26	15	5	949009	0.0468863	TRUE	1	101.1	6303
P7_1chr_p26	p26	15	6	93851	0.1838	FALSE	5	1.55249
P8_1chr_p26	p26	15	7	275746	0.149395	TRUE	1	46.153	2449
P9_1chr_p26	p26	15	8	438453	0.0822228	TRUE	1	47.5791	3970
P10_1chr_p26	p26	15	9	168697	0.0847224	TRUE	1	50.4027	2153
P11_1chr_p26	p26	15	10	980225	0.0492138	TRUE	1	123.251	8618
P12_1chr_p26	p26	15	11	40405	0.172438	FALSE	1	2.83457
P13_1chr_p26	p26	15	12	1322662	0.0545986	TRUE	2	97.0131	9348
P14_1chr_p26	p26	15	13	119127	0.107697	TRUE	1	15.7259	2495
P15_1chr_p26	p26	15	14	1016708	0.0519552	TRUE	1	152.845	8803
P16_1chr_p26	p26	15	15	26411	0.21782	FALSE	7	2.26281
P17_1chr_p26	p26	15	16	46736	0.198174	FALSE	6	2.22137
P18_1chr_p26	p26	15	17	57255	0.125322	FALSE	6	1.71096
P19_1chr_p26	p26	15	18	35552	0.157235	FALSE	10	1.88881
P20_1chr_p26	p26	15	19	213618	0.0602221	TRUE	1	151.771	1893
P21_1chr_p26	p26	15	20	23262	0.131305	FALSE	12	2.26392
P22_1chr_p26	p26	15	21	16758	0.159753	FALSE	11	1.87261
P23_1chr_p26	p26	15	22	20497	0.144683	FALSE	1	3.54859
P24_1chr_p26	p26	15	23	40629	0.173159	FALSE	6	2.34109
A1_1chr_p27	p27	0	0	103518	0.1276	FALSE	2	2.00775
A2_1chr_p27	p27	0	1	353773	0.101536	TRUE	1	53.0398	4328
A3_1chr_p27	p27	0	2	1020128	0.0478559	TRUE	2	39.3647	4257
A4_1chr_p27	p27	0	3	138021	0.142905	FALSE	6	1.42468
A5_1chr_p27	p27	0	4	223516	0.069094	TRUE	1	91.7534	1816
A6_1chr_p27	p27	0	5	611813	0.0663144	TRUE	2	32.1532	6998
A7_1chr_p27	p27	0	6	76980	0.312088	FALSE	11	1.81527
A8_1chr_p27	p27	0	7	53843	0.186282	FALSE	9	1.57632
A9_1chr_p27	p27	0	8	82321	0.176409	FALSE	13	1.9991
A10_1chr_p27	p27	0	9	135683	0.138677	FALSE	4	1.94996
A11_1chr_p27	p27	0	10	466407	0.067904	TRUE	1	153.291	4443
A12_1chr_p27	p27	0	11	92152	0.164463	FALSE	6	1.95785
A13_1chr_p27	p27	0	12	37190	0.296104	FALSE	7	2.23357
A14_1chr_p27	p27	0	13	13550728	0.0561634	FALSE	6	1.64378
A15_1chr_p27	p27	0	14	473866	0.0550464	TRUE	2	100.58	3897
A16_1chr_p27	p27	0	15	33352	0.390244	FALSE	15	2.15456
A17_1chr_p27	p27	0	16	700070	0.0606128	TRUE	2	94.2056	4957
A18_1chr_p27	p27	0	17	30150	0.358115	FALSE	19	2.37217
A19_1chr_p27	p27	0	18	1814751	0.0558984	TRUE	5	36.5902	19046
A20_1chr_p27	p27	0	19	541067	0.0575467	TRUE	1	53.3604	4251
A21_1chr_p27	p27	0	20	29402	0.515819	FALSE	5	1.58834
A22_1chr_p27	p27	0	21	811241	0.0685491	TRUE	2	54.6611	9079
A23_1chr_p27	p27	0	22	18198	0.269822	FALSE	11	1.85791
A24_1chr_p27	p27	0	23	371513	0.0681504	TRUE	1	61.2773	4321
B1_1chr_p27	p27	1	0	66136	0.17079	FALSE	14	1.54817
B2_1chr_p27	p27	1	1	21311	0.378453	FALSE	8	1.36386
B3_1chr_p27	p27	1	2	71697	0.155895	FALSE	5	1.4349
B4_1chr_p27	p27	1	3	438502	0.0999057	TRUE	1	362.448	7612
B5_1chr_p27	p27	1	4	110362	0.0818056	FALSE	3	1.53988
B6_1chr_p27	p27	1	5	55965	0.250309	FALSE	10	1.51877
B7_1chr_p27	p27	1	6	875862	0.0498448	TRUE	1	194.93	3360
B8_1chr_p27	p27	1	7	1196006	0.0693336	TRUE	3	206.441	13708
B9_1chr_p27	p27	1	8	2089622	0.0468676	TRUE	4	134.434	18951
B10_1chr_p27	p27	1	9	528677	0.0585208	TRUE	1	176.894	4797
B11_1chr_p27	p27	1	10	44975	0.126903	FALSE	8	1.76673
B12_1chr_p27	p27	1	11	38921	0.170069	FALSE	4	1.99957
B13_1chr_p27	p27	1	12	31172	0.179737	FALSE	2	3.18316
B14_1chr_p27	p27	1	13	1344235	0.0897663	TRUE	7	80.1516	21392
B15_1chr_p27	p27	1	14	16767	0.227876	FALSE	1	3.24109
B16_1chr_p27	p27	1	15	13647	0.303578	FALSE	12	2.27571
B17_1chr_p27	p27	1	16	27918	0.157832	FALSE	11	1.71856
B18_1chr_p27	p27	1	17	146828	0.0914439	TRUE	1	155.163	2136
B19_1chr_p27	p27	1	18	70795	0.123014	FALSE	13	1.52254
B20_1chr_p27	p27	1	19	85262	0.118188	FALSE	3	1.48065
B21_1chr_p27	p27	1	20	27126	0.18691	FALSE	7	1.47488
B22_1chr_p27	p27	1	21	230383	0.163692	TRUE	4	21.2794	2234
B23_1chr_p27	p27	1	22	210218	0.0571265	TRUE	1	312.78	2107
B24_1chr_p27	p27	1	23	765951	0.0660982	TRUE	1	151.066	6762
C1_1chr_p27	p27	2	0	298148	0.123872	TRUE	1	11.8127	808
C2_1chr_p27	p27	2	1	421183	0.0778977	TRUE	2	44.1408	4263
C3_1chr_p27	p27	2	2	4235650	0.058446	TRUE	8	111.71	45462
C4_1chr_p27	p27	2	3	536225	0.0589056	TRUE	1	50.7156	1486
C5_1chr_p27	p27	2	4	99066	0.0971642	TRUE	1	22.8985	529
C6_1chr_p27	p27	2	5	412870	0.0753799	TRUE	1	63.8051	4076
C7_1chr_p27	p27	2	6	1168295	0.0513338	TRUE	1	267.331	11818
C8_1chr_p27	p27	2	7	791209	0.0727741	TRUE	1	179.511	7109
C9_1chr_p27	p27	2	8	161361	0.122765	FALSE	5	2.083
C10_1chr_p27	p27	2	9	84345	0.161379	FALSE	6	2.77741
C11_1chr_p27	p27	2	10	46519	0.12766	FALSE	8	1.88218
C12_1chr_p27	p27	2	11	54175	0.164928	FALSE	9	2.01499
C13_1chr_p27	p27	2	12	675424	0.0521207	TRUE	1	223.694	6749
C14_1chr_p27	p27	2	13	68634	0.208432	FALSE	10	1.65606
C15_1chr_p27	p27	2	14	167774	0.0777517	TRUE	1	72.1742	2062
C16_1chr_p27	p27	2	15	32006	0.226412	FALSE	6	2.09411
C17_1chr_p27	p27	2	16	32286	0.168733	FALSE	6	2.24285
C18_1chr_p27	p27	2	17	111477	0.114138	TRUE	1	29.4538	1279
C19_1chr_p27	p27	2	18	155886	0.112867	FALSE	2	1.52496
C20_1chr_p27	p27	2	19	452923	0.0669077	TRUE	2	34.9334	4056
C21_1chr_p27	p27	2	20	249138	0.0983057	TRUE	1	41.3716	2734
C22_1chr_p27	p27	2	21	575628	0.0550634	TRUE	1	148.573	5842
C23_1chr_p27	p27	2	22	1127237	0.0572336	TRUE	2	227.037	9215
C24_1chr_p27	p27	2	23	24240	0.32534	FALSE	10	1.76789
D1_1chr_p27	p27	3	0	911228	0.0507238	TRUE	2	110.157	8486
D2_1chr_p27	p27	3	1	137896	0.172445	TRUE	1	18.3063	1439
D3_1chr_p27	p27	3	2	136590	0.127704	FALSE	14	1.57268
D4_1chr_p27	p27	3	3	182331	0.0938775	TRUE	1	135.748	2073
D5_1chr_p27	p27	3	4	704698	0.0510719	TRUE	1	129.966	6169
D6_1chr_p27	p27	3	5	160628	0.175382	FALSE	9	1.65982
D7_1chr_p27	p27	3	6	570055	0.0827703	TRUE	1	176.768	5102
D8_1chr_p27	p27	3	7	43128	0.161388	FALSE	12	2.36641
D9_1chr_p27	p27	3	8	11411635	0.0529182	TRUE	8	150.141	99717
D10_1chr_p27	p27	3	9	247274	0.141884	TRUE	1	70.6002	2325
D11_1chr_p27	p27	3	10	120537	0.124814	TRUE	1	77.067	913
D12_1chr_p27	p27	3	11	351709	0.089778	TRUE	1	126.203	3780
D13_1chr_p27	p27	3	12	92060	0.165787	FALSE	7	1.74393
D14_1chr_p27	p27	3	13	523217	0.134277	TRUE	5	39.0325	8656
D15_1chr_p27	p27	3	14	322609	0.110213	TRUE	1	148.826	3084
D16_1chr_p27	p27	3	15	16032	0.352408	FALSE	11	3.0383
D17_1chr_p27	p27	3	16	22996	0.215977	FALSE	7	2.01261
D18_1chr_p27	p27	3	17	23911	0.283809	FALSE	5	1.9064
D19_1chr_p27	p27	3	18	82758	0.151768	FALSE	9	1.65806
D20_1chr_p27	p27	3	19	162855	0.101175	TRUE	1	15.2366	1569
D21_1chr_p27	p27	3	20	20103	0.363768	FALSE	6	1.83472
D22_1chr_p27	p27	3	21	246458	0.0869581	TRUE	2	44.9584	2517
D23_1chr_p27	p27	3	22	931021	0.0595962	TRUE	4	121.771	9847
D24_1chr_p27	p27	3	23	371271	0.063185	TRUE	1	141.176	4140
E1_1chr_p27	p27	4	0	158261	0.0930196	TRUE	1	24.027	1196
E2_1chr_p27	p27	4	1	11601267	0.0704138	FALSE	9	1.71546
E3_1chr_p27	p27	4	2	1378775	0.0441481	TRUE	2	86.9745	9170
E4_1chr_p27	p27	4	3	124580	0.137629	FALSE	1	1.9708
E5_1chr_p27	p27	4	4	249970	0.0644564	TRUE	1	108.451	2300
E6_1chr_p27	p27	4	5	49468	0.312163	FALSE	13	1.57807
E7_1chr_p27	p27	4	6	77994	0.172904	FALSE	7	1.59928
E8_1chr_p27	p27	4	7	577344	0.0688403	TRUE	1	199.221	7280
E9_1chr_p27	p27	4	8	716890	0.0637917	TRUE	1	69.5163	6852
E10_1chr_p27	p27	4	9	70200	0.161061	FALSE	9	1.90734
E11_1chr_p27	p27	4	10	48512	0.132327	FALSE	6	1.97021
E12_1chr_p27	p27	4	11	550540	0.0612805	TRUE	1	96.0086	5752
E13_1chr_p27	p27	4	12	27365	0.325571	FALSE	12	2.28188
E14_1chr_p27	p27	4	13	46875	0.294983	FALSE	6	1.6504
E15_1chr_p27	p27	4	14	24302	0.347713	FALSE	13	2.78351
E16_1chr_p27	p27	4	15	263843	0.148016	TRUE	1	49.6578	2971
E17_1chr_p27	p27	4	16	842175	0.0612324	TRUE	1	257.79	7745
E18_1chr_p27	p27	4	17	999189	0.058453	TRUE	1	164.886	9638
E19_1chr_p27	p27	4	18	83565	0.191282	FALSE	12	1.59717
E20_1chr_p27	p27	4	19	447643	0.0796985	TRUE	1	63.6703	4407
E21_1chr_p27	p27	4	20	180109	0.146171	TRUE	1	15.6254	2307
E22_1chr_p27	p27	4	21	1879214	0.0749885	TRUE	4	57.8248	20281
E23_1chr_p27	p27	4	22	22810	0.237548	FALSE	10	1.86142
E24_1chr_p27	p27	4	23	2870744	0.0546264	TRUE	6	73.2298	24823
F1_1chr_p27	p27	5	0	324145	0.0611902	TRUE	1	49.9351	2071
F2_1chr_p27	p27	5	1	402419	0.0999768	TRUE	1	57.5667	4673
F3_1chr_p27	p27	5	2	317075	0.0888391	TRUE	1	66.8436	3402
F4_1chr_p27	p27	5	3	1606452	0.142348	FALSE	16	1.97984
F5_1chr_p27	p27	5	4	80251	0.102096	FALSE	2	4.09748
F6_1chr_p27	p27	5	5	795533	0.0839288	TRUE	1	104.8	8444
F7_1chr_p27	p27	5	6	65167	0.169667	FALSE	12	1.81237
F8_1chr_p27	p27	5	7	69237	0.158364	FALSE	12	1.65886
F9_1chr_p27	p27	5	8	62520	0.159685	FALSE	14	1.94682
F10_1chr_p27	p27	5	9	27928	0.232927	FALSE	9	1.934
F11_1chr_p27	p27	5	10	492559	0.0920175	TRUE	1	253.309	5867
F12_1chr_p27	p27	5	11	511956	0.0779716	TRUE	1	177.079	6900
F13_1chr_p27	p27	5	12	2866729	0.0553311	TRUE	8	191.689	30904
F14_1chr_p27	p27	5	13	556888	0.0871687	TRUE	1	242.57	6161
F15_1chr_p27	p27	5	14	173040	0.0783429	TRUE	1	80.3717	899
F16_1chr_p27	p27	5	15	597482	0.0701602	TRUE	1	247.168	6635
F17_1chr_p27	p27	5	16	906452	0.0658586	TRUE	3	156.183	10677
F18_1chr_p27	p27	5	17	45026	0.165646	FALSE	14	1.79507
F19_1chr_p27	p27	5	18	490181	0.0592639	TRUE	1	180.418	4573
F20_1chr_p27	p27	5	19	194937	0.0703889	TRUE	1	43.6065	2172
F21_1chr_p27	p27	5	20	95420	0.104756	TRUE	1	33.3546	1127
F22_1chr_p27	p27	5	21	47937	0.146618	FALSE	5	1.83996
F23_1chr_p27	p27	5	22	185681	0.0704688	TRUE	1	278.259	2225
F24_1chr_p27	p27	5	23	21653	0.350037	FALSE	13	1.74106
G1_1chr_p27	p27	6	0	82320	0.137696	FALSE	1	2.19977
G2_1chr_p27	p27	6	1	67691	0.232958	FALSE	2	2.2104
G3_1chr_p27	p27	6	2	118609	0.152175	FALSE	8	1.60202
G4_1chr_p27	p27	6	3	90693	0.138734	FALSE	2	1.7498
G5_1chr_p27	p27	6	4	537146	0.0692427	TRUE	1	62.9823	2731
G6_1chr_p27	p27	6	5	100654	0.217806	TRUE	1	11.2465	1564
G7_1chr_p27	p27	6	6	305109	0.0792289	TRUE	1	48.0402	2818
G8_1chr_p27	p27	6	7	1409962	0.0602711	TRUE	3	142.326	15943
G9_1chr_p27	p27	6	8	1036870	0.0490019	TRUE	1	117.062	8958
G10_1chr_p27	p27	6	9	547090	0.143646	TRUE	1	73.2347	4112
G11_1chr_p27	p27	6	10	40992	0.175252	FALSE	9	2.1782
G12_1chr_p27	p27	6	11	7621841	0.0658638	TRUE	10	19.1639	64795
G13_1chr_p27	p27	6	12	1721485	0.0488697	TRUE	2	248.222	12589
G14_1chr_p27	p27	6	13	30193	0.418021	FALSE	8	1.96365
G15_1chr_p27	p27	6	14	692148	0.146128	TRUE	3	96.646	8462
G16_1chr_p27	p27	6	15	413782	0.0708918	TRUE	1	260.701	5142
G17_1chr_p27	p27	6	16	166111	0.110177	TRUE	1	113.134	2447
G18_1chr_p27	p27	6	17	567117	0.0890854	TRUE	1	71.4116	6390
G19_1chr_p27	p27	6	18	1075358	0.0809747	TRUE	1	110.737	11190
G20_1chr_p27	p27	6	19	38815	0.240827	FALSE	6	1.83268
G21_1chr_p27	p27	6	20	794619	0.0678769	TRUE	1	118.884	8536
G22_1chr_p27	p27	6	21	392547	0.0753044	TRUE	1	70.4954	5571
G23_1chr_p27	p27	6	22	18752	0.249004	FALSE	9	2.14124
G24_1chr_p27	p27	6	23	4078365	0.05619	FALSE	9	1.99151
H1_1chr_p27	p27	7	0	91798	0.12816	FALSE	1	7.24473
H2_1chr_p27	p27	7	1	668613	0.0807261	TRUE	2	60.886	9352
H3_1chr_p27	p27	7	2	123159	0.169049	FALSE	13	1.36782
H4_1chr_p27	p27	7	3	36928	0.253904	FALSE	11	1.3891
H5_1chr_p27	p27	7	4	72139	0.128189	FALSE	9	1.64421
H6_1chr_p27	p27	7	5	134516	0.166471	TRUE	1	41.7364	3183
H7_1chr_p27	p27	7	6	7652247	0.0593114	FALSE	1	3.32603
H8_1chr_p27	p27	7	7	12365	0.489083	FALSE	8	2.11402
H9_1chr_p27	p27	7	8	89700	0.219221	FALSE	1	4.56885
H10_1chr_p27	p27	7	9	340487	0.192471	TRUE	2	148.246	11315
H11_1chr_p27	p27	7	10	1071344	0.0770294	TRUE	2	319.395	10327
H12_1chr_p27	p27	7	11	963220	0.104371	TRUE	5	58.164	17594
H13_1chr_p27	p27	7	12	255784	0.0863917	TRUE	2	37.7993	3041
H14_1chr_p27	p27	7	13	15501	0.633198	FALSE	12	1.47991
H15_1chr_p27	p27	7	14	112473	0.128865	TRUE	1	43.0528	1214
H16_1chr_p27	p27	7	15	355339	0.0806018	TRUE	1	29.6825	3305
H17_1chr_p27	p27	7	16	416727	0.0666878	TRUE	3	31.5017	4207
H18_1chr_p27	p27	7	17	5097798	0.0675725	FALSE	13	57.4376
H19_1chr_p27	p27	7	18	167015	0.11174	TRUE	1	22.8667	2184
H20_1chr_p27	p27	7	19	33566	0.323037	FALSE	6	1.56588
H21_1chr_p27	p27	7	20	766331	0.0589379	TRUE	2	54.8473	7523
H22_1chr_p27	p27	7	21	43761	0.245164	FALSE	1	7.08305
H23_1chr_p27	p27	7	22	217587	0.0684672	TRUE	1	36.6342	1612
H24_1chr_p27	p27	7	23	14869472	0.0585802	FALSE	7	1.59155
I1_1chr_p27	p27	8	0	461620	0.0589935	TRUE	1	78.9647	4171
I2_1chr_p27	p27	8	1	130481	0.152811	FALSE	6	1.5066
I3_1chr_p27	p27	8	2	187024	0.0914388	TRUE	1	30.2431	1823
I4_1chr_p27	p27	8	3	493250	0.0740084	TRUE	1	39.8209	3452
I5_1chr_p27	p27	8	4	62816	0.113152	FALSE	5	1.52818
I6_1chr_p27	p27	8	5	62707	0.215439	FALSE	6	1.79899
I7_1chr_p27	p27	8	6	1768540	0.0575531	TRUE	4	88.5864	17567
I8_1chr_p27	p27	8	7	220976	0.106411	TRUE	1	148.97	2189
I9_1chr_p27	p27	8	8	66029	0.182493	FALSE	13	2.40195
I10_1chr_p27	p27	8	9	57044	0.161667	FALSE	4	2.82742
I11_1chr_p27	p27	8	10	48299	0.134273	FALSE	7	1.77051
I12_1chr_p27	p27	8	11	170115	0.116427	TRUE	1	52.1456	1546
I13_1chr_p27	p27	8	12	1453624	0.0629601	TRUE	3	180.184	13859
I14_1chr_p27	p27	8	13	38983	0.306318	FALSE	12	1.88036
I15_1chr_p27	p27	8	14	611314	0.0623015	TRUE	1	312.432	7866
I16_1chr_p27	p27	8	15	7968569	0.0526939	FALSE	17	113.973
I17_1chr_p27	p27	8	16	1447622	0.0468914	TRUE	1	303.692	12425
I18_1chr_p27	p27	8	17	1432742	0.0391271	TRUE	1	177.677	11000
I19_1chr_p27	p27	8	18	1221724	0.0584016	TRUE	1	94.6807	10198
I20_1chr_p27	p27	8	19	617259	0.0605167	TRUE	1	84.9643	5866
I21_1chr_p27	p27	8	20	18341	0.487897	FALSE	7	1.65256
I22_1chr_p27	p27	8	21	119241	0.104933	TRUE	1	28.2345	1858
I23_1chr_p27	p27	8	22	207622	0.0605949	TRUE	1	69.2202	1049
I24_1chr_p27	p27	8	23	363292	0.0805699	TRUE	1	41.8992	4000
J1_1chr_p27	p27	9	0	183271	0.103637	FALSE	5	1.63098
J2_1chr_p27	p27	9	1	94246	0.176701	FALSE	8	1.62006
J3_1chr_p27	p27	9	2	783416	0.0658627	TRUE	1	18.0071	6734
J4_1chr_p27	p27	9	3	128171	0.122231	FALSE	17	1.57422
J5_1chr_p27	p27	9	4	389180	0.0565871	TRUE	1	107.457	3215
J6_1chr_p27	p27	9	5	43922	0.224792	FALSE	7	2.40922
J7_1chr_p27	p27	9	6	70050	0.154003	FALSE	10	2.4756
J8_1chr_p27	p27	9	7	96409	0.148752	FALSE	12	1.78317
J9_1chr_p27	p27	9	8	1013668	0.0426415	TRUE	1	142.779	6982
J10_1chr_p27	p27	9	9	33531	0.221371	FALSE	8	2.5954
J11_1chr_p27	p27	9	10	584368	0.0569648	TRUE	1	143.56	5926
J12_1chr_p27	p27	9	11	612179	0.0753091	TRUE	1	169.596	7861
J13_1chr_p27	p27	9	12	29265	0.220081	FALSE	7	3.17695
J14_1chr_p27	p27	9	13	601642	0.0847163	TRUE	1	251.539	8919
J15_1chr_p27	p27	9	14	481178	0.0768007	TRUE	1	353.947	5344
J16_1chr_p27	p27	9	15	604114	0.0569269	TRUE	1	273.115	6044
J17_1chr_p27	p27	9	16	1420884	0.0428608	TRUE	1	223.465	12189
J18_1chr_p27	p27	9	17	98715	0.200291	TRUE	1	116.358	3638
J19_1chr_p27	p27	9	18	1800054	0.0436612	TRUE	3	93.4009	14433
J20_1chr_p27	p27	9	19	34749	0.209165	FALSE	10	1.92172
J21_1chr_p27	p27	9	20	60202	0.251485	FALSE	9	2.41421
J22_1chr_p27	p27	9	21	831917	0.0715705	TRUE	4	94.9924	9399
J23_1chr_p27	p27	9	22	19932	0.171076	FALSE	10	2.17606
J24_1chr_p27	p27	9	23	407564	0.0685099	TRUE	1	70.4449	3441
K1_1chr_p27	p27	10	0	784476	0.0552842	TRUE	1	86.3806	5151
K2_1chr_p27	p27	10	1	110161	0.17565	FALSE	6	1.53453
K3_1chr_p27	p27	10	2	80818	0.162274	FALSE	11	1.54889
K4_1chr_p27	p27	10	3	61643	0.16523	FALSE	14	1.45738
K5_1chr_p27	p27	10	4	797342	0.0587171	TRUE	3	127.459	8584
K6_1chr_p27	p27	10	5	10847568	0.0655515	FALSE	17	2.01259
K7_1chr_p27	p27	10	6	1221936	0.0680135	TRUE	2	76.184	9863
K8_1chr_p27	p27	10	7	237351	0.141771	TRUE	1	72.0325	2524
K9_1chr_p27	p27	10	8	546898	0.0699889	TRUE	1	46.9919	2633
K10_1chr_p27	p27	10	9	174448	0.130698	FALSE	8	1.90949
K11_1chr_p27	p27	10	10	487324	0.0742708	TRUE	1	242.877	5975
K12_1chr_p27	p27	10	11	637963	0.0655069	TRUE	1	123.462	8355
K13_1chr_p27	p27	10	12	293915	0.0857821	TRUE	1	173.421	2501
K14_1chr_p27	p27	10	13	28218	0.39712	FALSE	14	1.7872
K15_1chr_p27	p27	10	14	779375	0.0949901	TRUE	1	225.451	9641
K16_1chr_p27	p27	10	15	26041	0.310259	FALSE	10	2.21902
K17_1chr_p27	p27	10	16	155387	0.0927666	TRUE	1	65.251	2649
K18_1chr_p27	p27	10	17	3537845	0.0544059	TRUE	6	106.518	40158
K19_1chr_p27	p27	10	18	464911	0.0792405	TRUE	1	26.4709	3862
K20_1chr_p27	p27	10	19	403198	0.0937836	TRUE	1	44.3392	3438
K21_1chr_p27	p27	10	20	19808	0.560241	FALSE	11	1.8073
K22_1chr_p27	p27	10	21	520094	0.066404	TRUE	1	138.413	6474
K23_1chr_p27	p27	10	22	165998	0.0723612	TRUE	1	209.809	2272
K24_1chr_p27	p27	10	23	28179	0.440205	FALSE	11	1.75196
L1_1chr_p27	p27	11	0	875079	0.0505773	TRUE	1	97.406	4780
L2_1chr_p27	p27	11	1	212264	0.132079	TRUE	1	74.6144	4433
L3_1chr_p27	p27	11	2	53539	0.164271	FALSE	12	1.52509
L4_1chr_p27	p27	11	3	581258	0.0724838	TRUE	1	80.007	7098
L5_1chr_p27	p27	11	4	181137	0.0831827	TRUE	1	147.828	1675
L6_1chr_p27	p27	11	5	77909	0.200213	FALSE	14	1.80501
L7_1chr_p27	p27	11	6	83262	0.145976	FALSE	10	1.95496
L8_1chr_p27	p27	11	7	185816	0.0781422	TRUE	1	124.748	2185
L9_1chr_p27	p27	11	8	801689	0.0740328	TRUE	1	114.919	5150
L10_1chr_p27	p27	11	9	3076906	0.0646969	TRUE	8	114.641	37159
L11_1chr_p27	p27	11	10	39273	0.148004	FALSE	12	1.84033
L12_1chr_p27	p27	11	11	123465	0.121305	TRUE	1	31.1227	1221
L13_1chr_p27	p27	11	12	340998	0.0651581	TRUE	2	80.9379	2804
L14_1chr_p27	p27	11	13	17124	0.382757	FALSE	12	2.20255
L15_1chr_p27	p27	11	14	100382	0.107666	TRUE	1	168.397	1741
L16_1chr_p27	p27	11	15	828566	0.0505584	TRUE	2	194.129	7243
L17_1chr_p27	p27	11	16	230897	0.0569411	TRUE	1	134.337	1898
L18_1chr_p27	p27	11	17	296012	0.0981571	TRUE	1	55.9043	3761
L19_1chr_p27	p27	11	18	728834	0.0527106	TRUE	1	47.3913	5349
L20_1chr_p27	p27	11	19	241465	0.106711	TRUE	1	48.7041	2771
L21_1chr_p27	p27	11	20	22516	0.290891	FALSE	18	2.29736
L22_1chr_p27	p27	11	21	855855	0.070738	TRUE	1	190.259	8384
L23_1chr_p27	p27	11	22	204625	0.143932	TRUE	1	163.119	1616
L24_1chr_p27	p27	11	23	19961	0.345562	FALSE	18	2.42497
M1_1chr_p27	p27	12	0	553266	0.058506	TRUE	1	94.1153	5057
M2_1chr_p27	p27	12	1	531047	0.0827408	TRUE	1	47.2088	5438
M3_1chr_p27	p27	12	2	335309	0.0823976	TRUE	1	50.4159	3316
M4_1chr_p27	p27	12	3	1091375	0.0606119	TRUE	5	51.861	11612
M5_1chr_p27	p27	12	4	78178	0.161904	FALSE	2	1.91927
M6_1chr_p27	p27	12	5	712427	0.0662274	TRUE	1	57.1749	7477
M7_1chr_p27	p27	12	6	3893970	0.0581127	TRUE	7	46.4303	36936
M8_1chr_p27	p27	12	7	65907	0.213566	FALSE	8	1.61308
M9_1chr_p27	p27	12	8	142297	0.163532	TRUE	1	10.9481	1817
M10_1chr_p27	p27	12	9	1700465	0.0557442	TRUE	4	101.388	18101
M11_1chr_p27	p27	12	10	44499	0.220043	FALSE	7	1.98704
M12_1chr_p27	p27	12	11	490671	0.0700991	TRUE	1	81.0832	4916
M13_1chr_p27	p27	12	12	477512	0.0780065	TRUE	1	86.2177	4963
M14_1chr_p27	p27	12	13	1736253	0.0538649	TRUE	4	71.5318	14452
M15_1chr_p27	p27	12	14	1400578	0.0698824	TRUE	3	103.234	16489
M16_1chr_p27	p27	12	15	169978	0.109404	TRUE	1	83.1924	2400
M17_1chr_p27	p27	12	16	964332	0.0612076	TRUE	3	85.9307	8651
M18_1chr_p27	p27	12	17	480058	0.0650929	TRUE	1	77.8615	5393
M19_1chr_p27	p27	12	18	1970118	0.0913697	TRUE	1	10.4656	3814
M20_1chr_p27	p27	12	19	532626	0.0801578	TRUE	1	79.3676	4655
M21_1chr_p27	p27	12	20	14342687	0.0558257	FALSE	11	1.45809
M22_1chr_p27	p27	12	21	110315	0.141343	TRUE	1	17.2758	2035
M23_1chr_p27	p27	12	22	90706	0.109533	TRUE	1	12.5934	767
M24_1chr_p27	p27	12	23	394877	0.0734964	TRUE	1	24.618	2748
N1_1chr_p27	p27	13	0	221970	0.0950165	TRUE	1	80.9307	1859
N2_1chr_p27	p27	13	1	515599	0.0897003	TRUE	1	59.7803	7058
N3_1chr_p27	p27	13	2	134427	0.142386	FALSE	13	1.38079
N4_1chr_p27	p27	13	3	88985	0.135155	FALSE	4	1.44839
N5_1chr_p27	p27	13	4	126383	0.112957	FALSE	9	1.56159
N6_1chr_p27	p27	13	5	356952	0.0906323	TRUE	1	67.0855	3913
N7_1chr_p27	p27	13	6	72252	0.199824	FALSE	10	1.60223
N8_1chr_p27	p27	13	7	46705	0.204925	FALSE	1	2.83754
N9_1chr_p27	p27	13	8	203857	0.10621	TRUE	1	37.4995	1643
N10_1chr_p27	p27	13	9	48619	0.186505	FALSE	8	1.97482
N11_1chr_p27	p27	13	10	45868	0.142531	FALSE	7	2.04258
N12_1chr_p27	p27	13	11	446771	0.0767829	TRUE	1	111.49	6647
N13_1chr_p27	p27	13	12	886263	0.0487499	TRUE	2	170.559	7540
N14_1chr_p27	p27	13	13	36663	0.329708	TRUE	1	17.4541	1369
N15_1chr_p27	p27	13	14	251640	0.0748299	TRUE	1	185.059	3317
N16_1chr_p27	p27	13	15	525497	0.0640634	TRUE	2	52.695	5400
N17_1chr_p27	p27	13	16	316308	0.0679412	TRUE	1	94.041	3191
N18_1chr_p27	p27	13	17	37382	0.237842	FALSE	11	1.71314
N19_1chr_p27	p27	13	18	46440	0.249652	FALSE	6	1.82803
N20_1chr_p27	p27	13	19	43152	0.217274	FALSE	8	1.51858
N21_1chr_p27	p27	13	20	459088	0.0737337	TRUE	1	103.996	4613
N22_1chr_p27	p27	13	21	12787439	0.0663824	FALSE	4	1.68948
N23_1chr_p27	p27	13	22	792629	0.0604639	TRUE	1	205.046	7084
N24_1chr_p27	p27	13	23	169915	0.11023	TRUE	1	21.3347	3117
O1_1chr_p27	p27	14	0	364240	0.0823247	TRUE	1	93.4316	4515
O2_1chr_p27	p27	14	1	168284	0.158488	FALSE	2	7.32093
O3_1chr_p27	p27	14	2	123110	0.126793	TRUE	1	55.1354	1410
O4_1chr_p27	p27	14	3	64827	0.157368	FALSE	9	1.43872
O5_1chr_p27	p27	14	4	70318	0.136125	FALSE	11	1.63052
O6_1chr_p27	p27	14	5	4708240	0.0685952	FALSE	7	2.22411
O7_1chr_p27	p27	14	6	65994	0.190916	FALSE	13	2.08142
O8_1chr_p27	p27	14	7	259798	0.0778019	TRUE	1	85.126	3056
O9_1chr_p27	p27	14	8	469063	0.0745384	TRUE	1	84.9547	5467
O10_1chr_p27	p27	14	9	59110	0.191144	FALSE	7	2.27129
O11_1chr_p27	p27	14	10	39356	0.155906	FALSE	5	2.35056
O12_1chr_p27	p27	14	11	2003807	0.0629987	TRUE	3	173.111	18727
O13_1chr_p27	p27	14	12	210549	0.125802	TRUE	1	76.2882	1793
O14_1chr_p27	p27	14	13	394499	0.0893707	TRUE	1	81.6788	4391
O15_1chr_p27	p27	14	14	1823980	0.0801345	TRUE	5	175.73	25264
O16_1chr_p27	p27	14	15	26568	0.332693	FALSE	13	2.28235
O17_1chr_p27	p27	14	16	20852	0.327507	FALSE	5	2.12316
O18_1chr_p27	p27	14	17	23710	0.364533	FALSE	7	1.64048
O19_1chr_p27	p27	14	18	69690	0.23624	FALSE	6	1.68236
O20_1chr_p27	p27	14	19	127732	0.155352	FALSE	14	1.51195
O21_1chr_p27	p27	14	20	621837	0.063436	TRUE	2	81.651	7821
O22_1chr_p27	p27	14	21	137628	0.122657	TRUE	1	79.257	2410
O23_1chr_p27	p27	14	22	616810	0.0817422	TRUE	4	107.433	8251
O24_1chr_p27	p27	14	23	4743890	0.0516835	TRUE	10	53.7879	47396
P1_1chr_p27	p27	15	0	94567	0.140181	FALSE	2	4.42372
P2_1chr_p27	p27	15	1	1513940	0.0513016	TRUE	2	59.052	10712
P3_1chr_p27	p27	15	2	401168	0.0848083	TRUE	1	22.5363	2522
P4_1chr_p27	p27	15	3	57361	0.218989	FALSE	14	1.5269
P5_1chr_p27	p27	15	4	70389	0.11601	FALSE	7	1.56312
P6_1chr_p27	p27	15	5	498791	0.0759818	TRUE	1	33.3666	5094
P7_1chr_p27	p27	15	6	77091	0.239859	FALSE	12	1.50345
P8_1chr_p27	p27	15	7	236736	0.110571	TRUE	1	123.64	4151
P9_1chr_p27	p27	15	8	82585	0.199587	FALSE	11	1.76429
P10_1chr_p27	p27	15	9	27863	0.378617	FALSE	4	2.77651
P11_1chr_p27	p27	15	10	55894	0.158269	FALSE	7	1.97294
P12_1chr_p27	p27	15	11	57100	0.203945	TRUE	1	17.2055	1381
P13_1chr_p27	p27	15	12	25940	0.399277	FALSE	6	1.98169
P14_1chr_p27	p27	15	13	109344	0.142914	TRUE	1	13.6699	1853
P15_1chr_p27	p27	15	14	683532	0.0706977	TRUE	2	101.214	8189
P16_1chr_p27	p27	15	15	490756	0.0620235	TRUE	1	77.0357	4965
P17_1chr_p27	p27	15	16	88071	0.117147	FALSE	13	1.64995
P18_1chr_p27	p27	15	17	2042630	0.0604678	TRUE	7	58.6721	22591
P19_1chr_p27	p27	15	18	13402514	0.0559546	FALSE	15	1.86968
P20_1chr_p27	p27	15	19	11348797	0.0582915	FALSE	1	2.43461
P21_1chr_p27	p27	15	20	164885	0.108806	TRUE	1	20.8756	2424
P22_1chr_p27	p27	15	21	22406	0.425106	FALSE	16	2.02589
P23_1chr_p27	p27	15	22	411070	0.059727	TRUE	1	138.534	5489
P24_1chr_p27	p27	15	23	33539	0.434599	FALSE	11	1.40061

## Sheet: Table S5
Statistics of libraries sorted 5 chrom / well
Name	plate	row	column	Total_reads	dup_rate	success	n_enriched	enrichment	snp count
A01_5chr_p31_20180907	p31	0	0	588300	0.149276	TRUE	3	44.5571	10039
A02_5chr_p31_20180907	p31	0	1	879275	0.167699	TRUE	5	29.8231	16332
A03_5chr_p31_20180907	p31	0	2	585207	0.171645	TRUE	4	84.3643	15406
A04_5chr_p31_20180907	p31	0	3	712980	0.156291	TRUE	4	71.1744	14463
A05_5chr_p31_20180907	p31	0	4	734217	0.165964	TRUE	5	57.1091	16974
A06_5chr_p31_20180907	p31	0	5	479084	0.167976	TRUE	5	44.0936	10251
A07_5chr_p31_20180907	p31	0	6	1013976	0.15032	TRUE	5	57.355	20296
A08_5chr_p31_20180907	p31	0	7	2215327	0.143222	TRUE	4	54.7881	36994
A09_5chr_p31_20180907	p31	0	8	609662	0.171553	TRUE	5	43.1555	13710
A10_5chr_p31_20180907	p31	0	9	637871	0.180687	TRUE	4	53.4635	13747
A11_5chr_p31_20180907	p31	0	10	354591	0.178048	TRUE	5	35.8265	8010
A12_5chr_p31_20180907	p31	0	11	600454	0.146583	TRUE	5	52.9049	10713
A13_5chr_p31_20180907	p31	0	12	590782	0.168102	TRUE	5	17.849	9614
A14_5chr_p31_20180907	p31	0	13	442022	0.148242	TRUE	3	27.2502	6632
A15_5chr_p31_20180907	p31	0	14	650418	0.183117	TRUE	4	68.3849	16672
A16_5chr_p31_20180907	p31	0	15	503311	0.147444	TRUE	3	44.8362	8476
A17_5chr_p31_20180907	p31	0	16	881991	0.146179	TRUE	5	48.7092	17453
A18_5chr_p31_20180907	p31	0	17	781470	0.122899	TRUE	3	34.126	7766
A19_5chr_p31_20180907	p31	0	18	369817	0.179958	TRUE	4	33.2175	8213
A20_5chr_p31_20180907	p31	0	19	417147	0.181764	TRUE	5	32.6989	10390
A21_5chr_p31_20180907	p31	0	20	594241	0.180278	TRUE	5	65.3396	14760
A22_5chr_p31_20180907	p31	0	21	604707	0.16582	TRUE	5	51.7803	7368
A23_5chr_p31_20180907	p31	0	22	691794	0.147347	TRUE	3	68.7548	7125
A24_5chr_p31_20180907	p31	0	23	309952	0.155876	TRUE	4	26.403	4791
B01_5chr_p31_20180907	p31	1	0	707537	0.143295	TRUE	5	42.3084	13061
B02_5chr_p31_20180907	p31	1	1	454565	0.169133	TRUE	3	45.5256	7809
B03_5chr_p31_20180907	p31	1	2	887490	0.172781	TRUE	4	70.7494	23933
B04_5chr_p31_20180907	p31	1	3	676742	0.151537	TRUE	3	111.393	12318
B05_5chr_p31_20180907	p31	1	4	406967	0.17349	TRUE	5	24.5974	7616
B06_5chr_p31_20180907	p31	1	5	857744	0.160302	TRUE	6	76.4391	19746
B07_5chr_p31_20180907	p31	1	6	787228	0.15355	TRUE	6	49.0914	16333
B08_5chr_p31_20180907	p31	1	7	552569	0.147156	TRUE	3	89.3546	11400
B09_5chr_p31_20180907	p31	1	8	502788	0.159096	TRUE	4	38.4109	10578
B10_5chr_p31_20180907	p31	1	9	788528	0.17629	TRUE	4	80.5687	18770
B11_5chr_p31_20180907	p31	1	10	641530	0.164379	TRUE	4	85.1007	14241
B12_5chr_p31_20180907	p31	1	11	670486	0.165452	TRUE	5	91.1702	17099
B13_5chr_p31_20180907	p31	1	12	485012	0.157399	TRUE	4	55.2529	8774
B14_5chr_p31_20180907	p31	1	13	1758336	0.150691	TRUE	5	82.69	37489
B15_5chr_p31_20180907	p31	1	14	860944	0.159942	TRUE	4	89.7862	22040
B16_5chr_p31_20180907	p31	1	15	1085636	0.152922	TRUE	5	62.8595	26782
B17_5chr_p31_20180907	p31	1	16	310911	0.168846	TRUE	2	94.0246	8069
B18_5chr_p31_20180907	p31	1	17	818948	0.142042	TRUE	4	63.2199	16947
B19_5chr_p31_20180907	p31	1	18	723636	0.167387	TRUE	5	41.6412	17115
B20_5chr_p31_20180907	p31	1	19	381265	0.172037	TRUE	4	68.6107	9664
B21_5chr_p31_20180907	p31	1	20	566684	0.163736	TRUE	4	46.0091	12828
B22_5chr_p31_20180907	p31	1	21	768799	0.151883	TRUE	4	87.6365	16660
B23_5chr_p31_20180907	p31	1	22	947980	0.182586	TRUE	6	72.0103	20630
B24_5chr_p31_20180907	p31	1	23	124963	0.201767	TRUE	1	16.7559	1590
C01_5chr_p31_20180907	p31	2	0	1115495	0.142371	TRUE	4	58.1094	16810
C02_5chr_p31_20180907	p31	2	1	619879	0.1294	TRUE	3	51.5952	11624
C03_5chr_p31_20180907	p31	2	2	780170	0.209892	TRUE	4	61.4646	18750
C04_5chr_p31_20180907	p31	2	3	640402	0.182486	TRUE	3	54.8884	15394
C05_5chr_p31_20180907	p31	2	4	792024	0.186762	TRUE	5	51.8234	17138
C06_5chr_p31_20180907	p31	2	5	836134	0.172748	TRUE	4	119.024	19784
C07_5chr_p31_20180907	p31	2	6	1039435	0.160568	TRUE	5	39.4988	17320
C08_5chr_p31_20180907	p31	2	7	918287	0.158395	TRUE	5	101.216	20815
C09_5chr_p31_20180907	p31	2	8	570520	0.189592	TRUE	3	37.5651	10817
C10_5chr_p31_20180907	p31	2	9	724682	0.154706	TRUE	5	74.3941	14691
C11_5chr_p31_20180907	p31	2	10	740914	0.20059	TRUE	4	55.7714	15028
C12_5chr_p31_20180907	p31	2	11	754381	0.159718	TRUE	3	84.4673	18084
C13_5chr_p31_20180907	p31	2	12	560955	0.209731	TRUE	5	30.2982	11286
C14_5chr_p31_20180907	p31	2	13	766798	0.165855	TRUE	6	52.1018	17879
C15_5chr_p31_20180907	p31	2	14	303349	0.257152	TRUE	4	16.4743	5112
C16_5chr_p31_20180907	p31	2	15	1079322	0.155007	TRUE	5	118.306	24878
C17_5chr_p31_20180907	p31	2	16	694347	0.192563	TRUE	6	40.6534	15392
C18_5chr_p31_20180907	p31	2	17	584703	0.149625	TRUE	3	72.2358	10667
C19_5chr_p31_20180907	p31	2	18	447845	0.224692	TRUE	3	41.7934	11318
C20_5chr_p31_20180907	p31	2	19	962171	0.175389	TRUE	4	61.8302	20751
C21_5chr_p31_20180907	p31	2	20	303890	0.238551	TRUE	5	19.3665	5335
C22_5chr_p31_20180907	p31	2	21	703722	0.143706	TRUE	4	82.436	13896
C23_5chr_p31_20180907	p31	2	22	892302	0.178556	TRUE	5	54.9151	17442
C24_5chr_p31_20180907	p31	2	23	644408	0.127589	TRUE	4	49.2412	10245
D01_5chr_p31_20180907	p31	3	0	492047	0.151184	TRUE	5	41.6813	10383
D02_5chr_p31_20180907	p31	3	1	765019	0.124207	TRUE	6	36.2475	12360
D03_5chr_p31_20180907	p31	3	2	806520	0.151906	TRUE	4	97.019	18558
D04_5chr_p31_20180907	p31	3	3	1023131	0.167694	TRUE	6	65.8603	21671
D05_5chr_p31_20180907	p31	3	4	808230	0.167059	TRUE	4	91.4815	20551
D06_5chr_p31_20180907	p31	3	5	602781	0.185874	TRUE	4	62.7105	16566
D07_5chr_p31_20180907	p31	3	6	971174	0.160552	TRUE	5	101.387	23886
D08_5chr_p31_20180907	p31	3	7	493458	0.168569	TRUE	3	57.9337	12972
D09_5chr_p31_20180907	p31	3	8	924801	0.159479	TRUE	4	66.5247	22839
D10_5chr_p31_20180907	p31	3	9	965020	0.165828	TRUE	5	61.2216	22021
D11_5chr_p31_20180907	p31	3	10	730819	0.149002	TRUE	4	73.061	14289
D12_5chr_p31_20180907	p31	3	11	650383	0.151742	TRUE	5	66.4029	12008
D13_5chr_p31_20180907	p31	3	12	992176	0.147351	TRUE	6	64.3216	21018
D14_5chr_p31_20180907	p31	3	13	1057661	0.142834	TRUE	5	77.5037	20885
D15_5chr_p31_20180907	p31	3	14	627192	0.162395	TRUE	4	105.459	13536
D16_5chr_p31_20180907	p31	3	15	1243707	0.146784	TRUE	4	168.731	22574
D17_5chr_p31_20180907	p31	3	16	615518	0.135232	TRUE	2	100.382	9244
D18_5chr_p31_20180907	p31	3	17	860756	0.145329	TRUE	4	60.414	17010
D19_5chr_p31_20180907	p31	3	18	862619	0.156716	TRUE	3	117.518	17698
D20_5chr_p31_20180907	p31	3	19	830384	0.155734	TRUE	6	52.05	15793
D21_5chr_p31_20180907	p31	3	20	645901	0.185903	TRUE	7	65.8212	20826
D22_5chr_p31_20180907	p31	3	21	685864	0.153173	TRUE	4	55.3882	14440
D23_5chr_p31_20180907	p31	3	22	490220	0.182248	TRUE	5	52.1644	12391
D24_5chr_p31_20180907	p31	3	23	867155	0.131946	TRUE	5	75.3946	14817
E01_5chr_p31_20180907	p31	4	0	1083956	0.17414	TRUE	3	54.929	18136
E02_5chr_p31_20180907	p31	4	1	1535231	0.137573	TRUE	5	34.7363	19098
E03_5chr_p31_20180907	p31	4	2	449696	0.173222	TRUE	5	58.815	11333
E04_5chr_p31_20180907	p31	4	3	978293	0.174904	TRUE	4	115.577	24636
E05_5chr_p31_20180907	p31	4	4	804484	0.167206	TRUE	4	94.8153	18018
E06_5chr_p31_20180907	p31	4	5	1157560	0.155501	TRUE	6	91.1092	28313
E07_5chr_p31_20180907	p31	4	6	427151	0.192925	TRUE	4	65.6426	12151
E08_5chr_p31_20180907	p31	4	7	782187	0.162924	TRUE	4	54.9124	22929
E09_5chr_p31_20180907	p31	4	8	577430	0.185626	TRUE	5	56.1349	15590
E10_5chr_p31_20180907	p31	4	9	1077052	0.162893	TRUE	4	109.006	26382
E11_5chr_p31_20180907	p31	4	10	576972	0.185452	TRUE	5	72.193	17162
E12_5chr_p31_20180907	p31	4	11	782187	0.158295	TRUE	3	90.581	10904
E13_5chr_p31_20180907	p31	4	12	608093	0.158057	TRUE	4	61.2618	12719
E14_5chr_p31_20180907	p31	4	13	1362000	0.15043	TRUE	5	77.7026	25701
E15_5chr_p31_20180907	p31	4	14	496174	0.163007	TRUE	3	52.5096	12441
E16_5chr_p31_20180907	p31	4	15	1320634	0.144125	TRUE	4	68.8362	24013
E17_5chr_p31_20180907	p31	4	16	668256	0.159086	TRUE	3	77.8758	13191
E18_5chr_p31_20180907	p31	4	17	564632	0.147547	TRUE	4	30.041	6777
E19_5chr_p31_20180907	p31	4	18	651914	0.197246	TRUE	4	26.6106	12325
E20_5chr_p31_20180907	p31	4	19	721774	0.189532	TRUE	3	40.1826	12468
E21_5chr_p31_20180907	p31	4	20	440864	0.224989	TRUE	5	64.8875	17067
E22_5chr_p31_20180907	p31	4	21	363633	0.171721	TRUE	2	22.3074	3849
E23_5chr_p31_20180907	p31	4	22	559077	0.179162	TRUE	4	59.6638	13673
E24_5chr_p31_20180907	p31	4	23	449784	0.142337	TRUE	3	36.689	5710
F01_5chr_p31_20180907	p31	5	0	855115	0.190901	TRUE	5	26.493	14401
F02_5chr_p31_20180907	p31	5	1	1400449	0.168618	TRUE	5	19.5251	19071
F03_5chr_p31_20180907	p31	5	2	899377	0.16354	TRUE	5	147.836	20052
F04_5chr_p31_20180907	p31	5	3	1219242	0.187733	TRUE	6	122.372	35162
F05_5chr_p31_20180907	p31	5	4	933683	0.180944	TRUE	5	101.323	26114
F06_5chr_p31_20180907	p31	5	5	551173	0.175435	TRUE	5	83.1684	14737
F07_5chr_p31_20180907	p31	5	6	1021607	0.178577	TRUE	6	88.4395	25452
F08_5chr_p31_20180907	p31	5	7	824491	0.161492	TRUE	4	100.47	18192
F09_5chr_p31_20180907	p31	5	8	1379960	0.157165	TRUE	5	106.772	33156
F10_5chr_p31_20180907	p31	5	9	1134102	0.168692	TRUE	4	153.622	29945
F11_5chr_p31_20180907	p31	5	10	1159835	0.150294	TRUE	5	67.7287	21043
F12_5chr_p31_20180907	p31	5	11	414217	0.202692	TRUE	5	20.3653	8860
F13_5chr_p31_20180907	p31	5	12	1017177	0.161306	TRUE	5	55.4111	19289
F14_5chr_p31_20180907	p31	5	13	1222342	0.149276	TRUE	3	120.108	23231
F15_5chr_p31_20180907	p31	5	14	1313772	0.188119	TRUE	5	56.4503	30989
F16_5chr_p31_20180907	p31	5	15	485198	0.179926	TRUE	3	35.6731	7317
F17_5chr_p31_20180907	p31	5	16	793789	0.179432	TRUE	4	37.7514	14657
F18_5chr_p31_20180907	p31	5	17	1501636	0.145476	TRUE	5	70.512	28885
F19_5chr_p31_20180907	p31	5	18	911339	0.190966	TRUE	5	47.5891	22722
F20_5chr_p31_20180907	p31	5	19	1168009	0.16082	TRUE	4	58.5826	23817
F21_5chr_p31_20180907	p31	5	20	470826	0.207803	TRUE	4	34.4953	9580
F22_5chr_p31_20180907	p31	5	21	1125873	0.155555	TRUE	6	77.2704	22768
F23_5chr_p31_20180907	p31	5	22	564944	0.196346	TRUE	4	51.5447	10791
F24_5chr_p31_20180907	p31	5	23	5523	0.995406	FALSE	20	3.42194
G01_5chr_p31_20180907	p31	6	0	873521	0.180505	TRUE	5	27.6447	15662
G02_5chr_p31_20180907	p31	6	1	1194630	0.134242	TRUE	6	45.5717	22858
G03_5chr_p31_20180907	p31	6	2	421529	0.19734	TRUE	5	63.0052	13088
G04_5chr_p31_20180907	p31	6	3	710884	0.167113	TRUE	4	96.6335	17107
G05_5chr_p31_20180907	p31	6	4	314937	0.183254	TRUE	3	46.0271	7056
G06_5chr_p31_20180907	p31	6	5	784291	0.172636	TRUE	5	53.0831	18584
G07_5chr_p31_20180907	p31	6	6	431954	0.181456	TRUE	4	59.3783	10550
G08_5chr_p31_20180907	p31	6	7	1408980	0.160825	TRUE	3	176.348	31746
G09_5chr_p31_20180907	p31	6	8	483273	0.199333	TRUE	5	31.6955	15015
G10_5chr_p31_20180907	p31	6	9	742346	0.164299	TRUE	5	53.4677	19125
G11_5chr_p31_20180907	p31	6	10	218121	0.256976	TRUE	3	44.6953	8999
G12_5chr_p31_20180907	p31	6	11	895140	0.144122	TRUE	5	79.6655	16429
G13_5chr_p31_20180907	p31	6	12	697148	0.171	TRUE	5	24.4022	15021
G14_5chr_p31_20180907	p31	6	13	827814	0.139191	TRUE	5	53.824	16297
G15_5chr_p31_20180907	p31	6	14	359633	0.231753	TRUE	3	80.0309	9181
G16_5chr_p31_20180907	p31	6	15	937757	0.15008	TRUE	4	73.186	21333
G17_5chr_p31_20180907	p31	6	16	588972	0.190184	TRUE	3	31.7701	12940
G18_5chr_p31_20180907	p31	6	17	608830	0.129797	TRUE	4	42.4792	9860
G19_5chr_p31_20180907	p31	6	18	917540	0.172477	TRUE	5	80.4998	20030
G20_5chr_p31_20180907	p31	6	19	1369156	0.147734	TRUE	6	108.459	30874
G21_5chr_p31_20180907	p31	6	20	606229	0.174124	TRUE	4	80.5784	15726
G22_5chr_p31_20180907	p31	6	21	109267	0.196492	TRUE	2	20.5935	2613
G23_5chr_p31_20180907	p31	6	22	1322099	0.157848	TRUE	5	114.457	32355
G24_5chr_p31_20180907	p31	6	23	551864	0.136112	TRUE	4	60.0206	9237
H01_5chr_p31_20180907	p31	7	0	873979	0.166994	TRUE	6	44.1675	19944
H02_5chr_p31_20180907	p31	7	1	2036186	0.15144	FALSE	7	8.95215
H03_5chr_p31_20180907	p31	7	2	559545	0.158994	TRUE	6	58.4258	11634
H04_5chr_p31_20180907	p31	7	3	691399	0.159023	TRUE	4	43.7104	15922
H05_5chr_p31_20180907	p31	7	4	762930	0.161337	TRUE	5	75.1732	14160
H06_5chr_p31_20180907	p31	7	5	1324467	0.166521	TRUE	5	78.3535	28893
H07_5chr_p31_20180907	p31	7	6	1229630	0.145094	TRUE	4	108.435	24802
H08_5chr_p31_20180907	p31	7	7	751130	0.157491	TRUE	4	68.6793	14264
H09_5chr_p31_20180907	p31	7	8	696375	0.153945	TRUE	4	73.8168	12358
H10_5chr_p31_20180907	p31	7	9	1134508	0.175324	TRUE	5	91.3939	34695
H11_5chr_p31_20180907	p31	7	10	998517	0.169702	TRUE	5	55.333	23245
H12_5chr_p31_20180907	p31	7	11	1040843	0.168084	TRUE	4	68.6829	24138
H13_5chr_p31_20180907	p31	7	12	911265	0.167041	TRUE	4	34.6749	23777
H14_5chr_p31_20180907	p31	7	13	1627491	0.14512	TRUE	5	108.754	35901
H15_5chr_p31_20180907	p31	7	14	843430	0.152439	TRUE	5	112.641	19022
H16_5chr_p31_20180907	p31	7	15	1102337	0.146275	TRUE	5	81.7489	18737
H17_5chr_p31_20180907	p31	7	16	2490777	0.20903	FALSE	4	7.81004
H18_5chr_p31_20180907	p31	7	17	1084390	0.130851	TRUE	3	72.1426	16546
H19_5chr_p31_20180907	p31	7	18	1308930	0.160503	TRUE	4	89.6183	27547
H20_5chr_p31_20180907	p31	7	19	512217	0.167245	TRUE	4	39.5433	11638
H21_5chr_p31_20180907	p31	7	20	355533	0.222566	TRUE	5	44.1593	12724
H22_5chr_p31_20180907	p31	7	21	549845	0.161245	TRUE	4	52.676	11250
H23_5chr_p31_20180907	p31	7	22	720152	0.164704	TRUE	4	64.471	12642
H24_5chr_p31_20180907	p31	7	23	727771	0.148765	TRUE	5	46.5318	18202
I01_5chr_p31_20180907	p31	8	0	737742	0.183553	TRUE	4	32.2757	14769
I02_5chr_p31_20180907	p31	8	1	672499	0.174649	TRUE	5	61.1486	17405
I03_5chr_p31_20180907	p31	8	2	351263	0.228492	TRUE	4	60.4443	11071
I04_5chr_p31_20180907	p31	8	3	843981	0.187589	TRUE	6	100.995	25159
I05_5chr_p31_20180907	p31	8	4	310447	0.246009	TRUE	5	43.4688	10379
I06_5chr_p31_20180907	p31	8	5	737810	0.182446	TRUE	6	66.2872	17433
I07_5chr_p31_20180907	p31	8	6	497781	0.225457	TRUE	5	65.669	17693
I08_5chr_p31_20180907	p31	8	7	1161748	0.163849	TRUE	4	122.255	28760
I09_5chr_p31_20180907	p31	8	8	1027864	0.184232	TRUE	5	93.5333	26766
I10_5chr_p31_20180907	p31	8	9	858223	0.198515	TRUE	6	125.952	24161
I11_5chr_p31_20180907	p31	8	10	437472	0.232181	TRUE	5	37.319	12730
I12_5chr_p31_20180907	p31	8	11	644112	0.182671	TRUE	4	93.565	17106
I13_5chr_p31_20180907	p31	8	12	573122	0.173567	TRUE	4	90.6115	13664
I14_5chr_p31_20180907	p31	8	13	1297238	0.165516	TRUE	6	80.1803	29230
I15_5chr_p31_20180907	p31	8	14	450842	0.21127	TRUE	5	62.1809	12882
I16_5chr_p31_20180907	p31	8	15	375523	0.168135	TRUE	5	81.323	8643
I17_5chr_p31_20180907	p31	8	16	615360	0.194975	TRUE	5	58.4645	16450
I18_5chr_p31_20180907	p31	8	17	268064	0.159578	TRUE	3	32.7662	3654
I19_5chr_p31_20180907	p31	8	18	395599	0.231743	TRUE	5	50.1321	11505
I20_5chr_p31_20180907	p31	8	19	601882	0.177055	TRUE	5	76.4129	17559
I21_5chr_p31_20180907	p31	8	20	422135	0.213726	TRUE	4	125.747	14362
I22_5chr_p31_20180907	p31	8	21	451211	0.15798	TRUE	3	94.3043	9002
I23_5chr_p31_20180907	p31	8	22	309356	0.230752	TRUE	4	93.9861	10978
I24_5chr_p31_20180907	p31	8	23	690925	0.126076	TRUE	5	66.8286	13597
J01_5chr_p31_20180907	p31	9	0	839024	0.164294	TRUE	4	32.552	17538
J02_5chr_p31_20180907	p31	9	1	1329737	0.14883	TRUE	5	39.67	23611
J03_5chr_p31_20180907	p31	9	2	746814	0.165907	TRUE	4	60.7788	16102
J04_5chr_p31_20180907	p31	9	3	632673	0.17203	TRUE	3	61.5866	16534
J05_5chr_p31_20180907	p31	9	4	1029141	0.165359	TRUE	6	76.6162	24416
J06_5chr_p31_20180907	p31	9	5	1070077	0.155093	TRUE	4	114.929	22073
J07_5chr_p31_20180907	p31	9	6	867065	0.16267	TRUE	5	82.0803	21895
J08_5chr_p31_20180907	p31	9	7	1119761	0.152612	TRUE	5	57.5806	18398
J09_5chr_p31_20180907	p31	9	8	469390	0.185894	TRUE	2	61.379	11403
J10_5chr_p31_20180907	p31	9	9	670470	0.191608	TRUE	3	79.4604	17768
J11_5chr_p31_20180907	p31	9	10	1358327	0.15234	TRUE	6	65.34	27342
J12_5chr_p31_20180907	p31	9	11	916400	0.169803	TRUE	4	62.2173	20423
J13_5chr_p31_20180907	p31	9	12	1717050	0.158169	TRUE	7	82.7909	35098
J14_5chr_p31_20180907	p31	9	13	1643847	0.127404	TRUE	3	122.379	27451
J15_5chr_p31_20180907	p31	9	14	835989	0.172782	TRUE	4	84.6922	17208
J16_5chr_p31_20180907	p31	9	15	1032823	0.160107	TRUE	5	79.4338	17812
J17_5chr_p31_20180907	p31	9	16	1416402	0.144159	TRUE	5	84.2171	29966
J18_5chr_p31_20180907	p31	9	17	1313536	0.144251	TRUE	5	58.5316	23813
J19_5chr_p31_20180907	p31	9	18	1244947	0.155762	TRUE	5	80.0144	26483
J20_5chr_p31_20180907	p31	9	19	753106	0.157996	TRUE	3	40.8313	14607
J21_5chr_p31_20180907	p31	9	20	764592	0.172298	TRUE	5	69.5704	22146
J22_5chr_p31_20180907	p31	9	21	386393	0.193823	TRUE	3	66.4361	9037
J23_5chr_p31_20180907	p31	9	22	645421	0.175011	TRUE	4	65.1495	12072
J24_5chr_p31_20180907	p31	9	23	887783	0.123444	TRUE	5	37.1358	9212
K01_5chr_p31_20180907	p31	10	0	834313	0.183043	TRUE	4	37.8579	14029
K02_5chr_p31_20180907	p31	10	1	649195	0.170792	TRUE	4	24.3605	8077
K03_5chr_p31_20180907	p31	10	2	929015	0.194452	TRUE	4	46.6987	21663
K04_5chr_p31_20180907	p31	10	3	835109	0.209705	TRUE	5	64.8513	23345
K05_5chr_p31_20180907	p31	10	4	533283	0.210327	TRUE	5	37.9149	13953
K06_5chr_p31_20180907	p31	10	5	790398	0.204647	TRUE	5	53.6072	20391
K07_5chr_p31_20180907	p31	10	6	1199336	0.160923	FALSE	5	9.70204
K08_5chr_p31_20180907	p31	10	7	972368	0.199698	TRUE	4	44.7234	23089
K09_5chr_p31_20180907	p31	10	8	853789	0.174729	TRUE	4	52.5622	16752
K10_5chr_p31_20180907	p31	10	9	562961	0.217122	TRUE	5	33.3083	12674
K11_5chr_p31_20180907	p31	10	10	517503	0.213266	TRUE	5	37.3069	14174
K12_5chr_p31_20180907	p31	10	11	1036595	0.180251	TRUE	6	55.1215	21632
K13_5chr_p31_20180907	p31	10	12	3274282	0.140756	FALSE	3	2.24466
K14_5chr_p31_20180907	p31	10	13	1188843	0.164641	TRUE	3	14.0107	15652
K15_5chr_p31_20180907	p31	10	14	359492	0.218918	TRUE	3	54.3987	10088
K16_5chr_p31_20180907	p31	10	15	863221	0.182026	TRUE	5	46.2929	16295
K17_5chr_p31_20180907	p31	10	16	443187	0.209014	TRUE	5	30.5128	10163
K18_5chr_p31_20180907	p31	10	17	1111756	0.172404	TRUE	5	41.0922	22355
K19_5chr_p31_20180907	p31	10	18	490823	0.212877	TRUE	4	26.9215	12311
K20_5chr_p31_20180907	p31	10	19	859637	0.194405	TRUE	4	46.0421	19478
K21_5chr_p31_20180907	p31	10	20	505237	0.226551	TRUE	5	52.1158	15993
K22_5chr_p31_20180907	p31	10	21	1055679	0.173462	TRUE	5	65.074	20557
K23_5chr_p31_20180907	p31	10	22	716257	0.178405	TRUE	5	58.2781	15488
K24_5chr_p31_20180907	p31	10	23	877272	0.176326	TRUE	4	58.3028	13613
L01_5chr_p31_20180907	p31	11	0	382207	0.183812	TRUE	3	26.1925	7298
L02_5chr_p31_20180907	p31	11	1	1189693	0.117745	TRUE	5	38.2972	14032
L03_5chr_p31_20180907	p31	11	2	1074270	0.16622	TRUE	4	99.7565	17657
L04_5chr_p31_20180907	p31	11	3	1113193	0.175706	TRUE	5	64.2031	22566
L05_5chr_p31_20180907	p31	11	4	1215287	0.168604	TRUE	5	49.6928	21524
L06_5chr_p31_20180907	p31	11	5	1206696	0.163191	TRUE	5	59.4761	21726
L07_5chr_p31_20180907	p31	11	6	1507722	0.150098	TRUE	4	68.5586	24652
L08_5chr_p31_20180907	p31	11	7	532002	0.194976	TRUE	4	21.6787	7936
L09_5chr_p31_20180907	p31	11	8	2110605	0.141243	TRUE	3	106.092	37318
L10_5chr_p31_20180907	p31	11	9	957780	0.175519	TRUE	5	42.5637	17935
L11_5chr_p31_20180907	p31	11	10	1073637	0.171405	TRUE	3	70.9953	20811
L12_5chr_p31_20180907	p31	11	11	1418009	0.153019	TRUE	5	53.9192	24272
L13_5chr_p31_20180907	p31	11	12	1465572	0.148095	TRUE	5	16.0271	18526
L14_5chr_p31_20180907	p31	11	13	3197746	0.13507	TRUE	4	19.2821	44775
L15_5chr_p31_20180907	p31	11	14	485980	0.219347	TRUE	3	53.0468	10380
L16_5chr_p31_20180907	p31	11	15	901040	0.162127	TRUE	5	38.9523	16968
L17_5chr_p31_20180907	p31	11	16	946452	0.16012	TRUE	4	53.9922	17235
L18_5chr_p31_20180907	p31	11	17	1664999	0.140185	TRUE	3	84.3448	28907
L19_5chr_p31_20180907	p31	11	18	819156	0.187946	TRUE	5	34.4041	12378
L20_5chr_p31_20180907	p31	11	19	1172231	0.165223	TRUE	5	66.7066	23752
L21_5chr_p31_20180907	p31	11	20	661772	0.181374	TRUE	4	61.0961	11451
L22_5chr_p31_20180907	p31	11	21	1084052	0.157555	TRUE	4	90.4488	20908
L23_5chr_p31_20180907	p31	11	22	944588	0.197695	TRUE	5	47.3582	21263
L24_5chr_p31_20180907	p31	11	23	6727	0.993662	FALSE	17	3.10792
M01_5chr_p31_20180907	p31	12	0	440049	0.209327	TRUE	5	35.1422	11054
M02_5chr_p31_20180907	p31	12	1	1245322	0.133239	TRUE	4	71.0987	19210
M03_5chr_p31_20180907	p31	12	2	245792	0.246808	TRUE	6	40.9755	9249
M04_5chr_p31_20180907	p31	12	3	476891	0.204284	TRUE	4	113.815	14902
M05_5chr_p31_20180907	p31	12	4	369016	0.2432	TRUE	5	40.5495	11254
M06_5chr_p31_20180907	p31	12	5	747789	0.182449	TRUE	5	74.6045	18723
M07_5chr_p31_20180907	p31	12	6	820194	0.201164	TRUE	4	82.8625	25647
M08_5chr_p31_20180907	p31	12	7	842745	0.175186	TRUE	4	101.605	22925
M09_5chr_p31_20180907	p31	12	8	643918	0.199948	TRUE	5	63.5309	21096
M10_5chr_p31_20180907	p31	12	9	887413	0.18155	TRUE	5	105.248	24912
M11_5chr_p31_20180907	p31	12	10	1128647	0.212992	TRUE	4	14.934	18000
M12_5chr_p31_20180907	p31	12	11	760798	0.176913	TRUE	6	37.2538	17913
M13_5chr_p31_20180907	p31	12	12	333672	0.239595	TRUE	4	25.333	11217
M14_5chr_p31_20180907	p31	12	13	649866	0.188148	TRUE	5	68.8056	17392
M15_5chr_p31_20180907	p31	12	14	414292	0.219885	TRUE	5	60.6298	14713
M16_5chr_p31_20180907	p31	12	15	581573	0.159968	TRUE	5	70.8664	12839
M17_5chr_p31_20180907	p31	12	16	477485	0.186274	TRUE	5	52.7369	12207
M18_5chr_p31_20180907	p31	12	17	1246448	0.149459	TRUE	4	121.185	32123
M19_5chr_p31_20180907	p31	12	18	667982	0.192875	TRUE	6	87.7332	19105
M20_5chr_p31_20180907	p31	12	19	623340	0.181672	TRUE	5	112.028	15339
M21_5chr_p31_20180907	p31	12	20	313121	0.261944	TRUE	4	49.4714	13374
M22_5chr_p31_20180907	p31	12	21	781631	0.176001	TRUE	6	73.5999	22276
M23_5chr_p31_20180907	p31	12	22	414570	0.214564	TRUE	3	68.919	11369
M24_5chr_p31_20180907	p31	12	23	705001	0.145776	TRUE	5	88.7817	12545
N01_5chr_p31_20180907	p31	13	0	619160	0.165732	TRUE	4	81.1485	12232
N02_5chr_p31_20180907	p31	13	1	1024401	0.142785	TRUE	4	29.1203	12604
N03_5chr_p31_20180907	p31	13	2	572358	0.143704	TRUE	4	109.867	10320
N04_5chr_p31_20180907	p31	13	3	518021	0.184082	TRUE	5	84.5947	15302
N05_5chr_p31_20180907	p31	13	4	832821	0.160106	TRUE	3	197.464	16809
N06_5chr_p31_20180907	p31	13	5	988922	0.162311	TRUE	5	92.4612	24176
N07_5chr_p31_20180907	p31	13	6	610315	0.177755	TRUE	6	59.2895	13487
N08_5chr_p31_20180907	p31	13	7	772729	0.156361	TRUE	5	71.8881	20535
N09_5chr_p31_20180907	p31	13	8	856556	0.168219	TRUE	3	126.356	22360
N10_5chr_p31_20180907	p31	13	9	797569	0.162745	TRUE	4	70.5215	19213
N11_5chr_p31_20180907	p31	13	10	1039400	0.169133	TRUE	4	58.8375	22298
N12_5chr_p31_20180907	p31	13	11	792306	0.170184	TRUE	4	35.5547	13387
N13_5chr_p31_20180907	p31	13	12	693513	0.162282	TRUE	4	94.0622	17078
N14_5chr_p31_20180907	p31	13	13	674910	0.163298	TRUE	5	67.5978	17884
N15_5chr_p31_20180907	p31	13	14	826845	0.182095	TRUE	6	116.966	22811
N16_5chr_p31_20180907	p31	13	15	905129	0.158813	TRUE	5	106.632	22435
N17_5chr_p31_20180907	p31	13	16	488401	0.170786	TRUE	5	36.5833	11741
N18_5chr_p31_20180907	p31	13	17	663762	0.156814	TRUE	5	68.701	14489
N19_5chr_p31_20180907	p31	13	18	463314	0.193719	TRUE	4	106.712	10976
N20_5chr_p31_20180907	p31	13	19	928233	0.16728	TRUE	6	54.2899	23393
N21_5chr_p31_20180907	p31	13	20	577069	0.182348	TRUE	5	108.747	15585
N22_5chr_p31_20180907	p31	13	21	598000	0.16624	TRUE	5	72.6155	12769
N23_5chr_p31_20180907	p31	13	22	714793	0.178199	TRUE	4	105.499	22391
N24_5chr_p31_20180907	p31	13	23	889003	0.149707	TRUE	4	43.5687	12160
O01_5chr_p31_20180907	p31	14	0	840661	0.156537	TRUE	5	90.9183	17697
O02_5chr_p31_20180907	p31	14	1	836112	0.137397	TRUE	5	57.0033	17306
O03_5chr_p31_20180907	p31	14	2	393497	0.214086	TRUE	4	50.9629	11646
O04_5chr_p31_20180907	p31	14	3	600079	0.15841	TRUE	4	73.2042	13633
O05_5chr_p31_20180907	p31	14	4	855093	0.171957	TRUE	6	93.5264	20836
O06_5chr_p31_20180907	p31	14	5	979433	0.163398	TRUE	7	44.9585	22838
O07_5chr_p31_20180907	p31	14	6	406899	0.195552	TRUE	5	50.8128	11116
O08_5chr_p31_20180907	p31	14	7	817442	0.152315	TRUE	5	63.1136	19804
O09_5chr_p31_20180907	p31	14	8	618301	0.149716	TRUE	4	87.5964	12305
O10_5chr_p31_20180907	p31	14	9	340855	0.182046	TRUE	5	53.6048	8885
O11_5chr_p31_20180907	p31	14	10	452552	0.188811	TRUE	5	54.3059	12396
O12_5chr_p31_20180907	p31	14	11	600951	0.153866	TRUE	4	80.334	14122
O13_5chr_p31_20180907	p31	14	12	448448	0.211814	TRUE	4	37.3222	13675
O14_5chr_p31_20180907	p31	14	13	686608	0.136673	TRUE	5	65.2174	11573
O15_5chr_p31_20180907	p31	14	14	328153	0.193138	TRUE	5	62.3959	8731
O16_5chr_p31_20180907	p31	14	15	665566	0.147251	TRUE	4	115.126	14565
O17_5chr_p31_20180907	p31	14	16	812947	0.164675	TRUE	4	86.311	17867
O18_5chr_p31_20180907	p31	14	17	657991	0.134678	TRUE	5	52.5445	13515
O19_5chr_p31_20180907	p31	14	18	419343	0.21322	TRUE	5	26.823	11120
O20_5chr_p31_20180907	p31	14	19	459822	0.169122	TRUE	2	170.524	9869
O21_5chr_p31_20180907	p31	14	20	353816	0.212764	TRUE	7	32.1855	11728
O22_5chr_p31_20180907	p31	14	21	381389	0.153608	TRUE	4	68.1855	8312
O23_5chr_p31_20180907	p31	14	22	580603	0.150518	TRUE	4	82.1722	8052
O24_5chr_p31_20180907	p31	14	23	648670	0.12684	TRUE	4	57.2355	7963
P01_5chr_p31_20180907	p31	15	0	998186	0.127872	TRUE	5	51.4781	16289
P02_5chr_p31_20180907	p31	15	1	756596	0.10878	TRUE	2	48.0354	7549
P03_5chr_p31_20180907	p31	15	2	463844	0.132654	TRUE	5	33.5833	7958
P04_5chr_p31_20180907	p31	15	3	1081390	0.119191	TRUE	5	72.0506	14392
P05_5chr_p31_20180907	p31	15	4	751597	0.162494	TRUE	5	60.8247	16917
P06_5chr_p31_20180907	p31	15	5	882919	0.163412	TRUE	4	39.9356	16859
P07_5chr_p31_20180907	p31	15	6	872620	0.145251	TRUE	4	69.011	16810
P08_5chr_p31_20180907	p31	15	7	725421	0.152577	TRUE	5	55.8986	15596
P09_5chr_p31_20180907	p31	15	8	849018	0.150562	TRUE	6	63.9909	17198
P10_5chr_p31_20180907	p31	15	9	447324	0.164223	TRUE	4	47.251	10672
P11_5chr_p31_20180907	p31	15	10	737436	0.160235	TRUE	4	97.6472	15443
P12_5chr_p31_20180907	p31	15	11	824819	0.15408	TRUE	5	66.3684	18356
P13_5chr_p31_20180907	p31	15	12	836615	0.140229	TRUE	4	101.358	18570
P14_5chr_p31_20180907	p31	15	13	554719	0.162588	TRUE	3	80.7265	14752
P15_5chr_p31_20180907	p31	15	14	764832	0.157143	TRUE	5	80.5476	18740
P16_5chr_p31_20180907	p31	15	15	733678	0.149603	TRUE	6	54.6299	12146
P17_5chr_p31_20180907	p31	15	16	717764	0.152692	TRUE	3	89.1611	16147
P18_5chr_p31_20180907	p31	15	17	563926	0.159854	TRUE	4	33.8642	12042
P19_5chr_p31_20180907	p31	15	18	754328	0.16382	TRUE	5	74.9315	17340
P20_5chr_p31_20180907	p31	15	19	847270	0.154625	TRUE	6	69.528	15795
P21_5chr_p31_20180907	p31	15	20	457049	0.177557	TRUE	6	37.7827	11760
P22_5chr_p31_20180907	p31	15	21	709646	0.141342	TRUE	4	76.4837	12671
P23_5chr_p31_20180907	p31	15	22	1594984	0.127262	TRUE	4	118.308	17300
P24_5chr_p31_20180907	p31	15	23	5662	0.985733	FALSE	15	3.61544
A01_5chr_p32_20180907	p32	0	0	257848	0.126227	TRUE	3	16.0708
A02_5chr_p32_20180907	p32	0	1	111325	0.141985	TRUE	1	12.3319
A03_5chr_p32_20180907	p32	0	2	1473993	0.0852944	TRUE	5	49.8026
A04_5chr_p32_20180907	p32	0	3	727975	0.0870717	TRUE	3	51.1617
A05_5chr_p32_20180907	p32	0	4	705547	0.106153	TRUE	3	62.1262
A06_5chr_p32_20180907	p32	0	5	603410	0.136493	TRUE	4	50.2504
A07_5chr_p32_20180907	p32	0	6	934051	0.139452	TRUE	5	29.5342
A08_5chr_p32_20180907	p32	0	7	1200116	0.0924563	TRUE	5	61.6878
A09_5chr_p32_20180907	p32	0	8	855404	0.116171	TRUE	4	14.9409
A10_5chr_p32_20180907	p32	0	9	468244	0.12312	TRUE	6	17.8971
A11_5chr_p32_20180907	p32	0	10	382777	0.104124	TRUE	4	27.5211
A12_5chr_p32_20180907	p32	0	11	787639	0.104339	TRUE	4	32.1369
A13_5chr_p32_20180907	p32	0	12	1090983	0.129443	TRUE	4	22.1413
A14_5chr_p32_20180907	p32	0	13	369108	0.125689	FALSE	4	8.8666
A15_5chr_p32_20180907	p32	0	14	1442786	0.100708	TRUE	4	59.858
A16_5chr_p32_20180907	p32	0	15	465483	0.11383	TRUE	5	23.4035
A17_5chr_p32_20180907	p32	0	16	1087568	0.0865634	TRUE	4	27.0657
A18_5chr_p32_20180907	p32	0	17	540688	0.099751	TRUE	3	32.3644
A19_5chr_p32_20180907	p32	0	18	1301305	0.0821012	TRUE	5	52.5113
A20_5chr_p32_20180907	p32	0	19	540144	0.109098	TRUE	3	58.7021
A21_5chr_p32_20180907	p32	0	20	563784	0.085689	TRUE	3	38.4609
A22_5chr_p32_20180907	p32	0	21	539926	0.0748686	TRUE	2	26.9716
A23_5chr_p32_20180907	p32	0	22	679307	0.124705	FALSE	3	3.01577
A24_5chr_p32_20180907	p32	0	23	2350202	0.0829436	TRUE	5	13.8142
B01_5chr_p32_20180907	p32	1	0	500507	0.102018	TRUE	4	38.7418
B02_5chr_p32_20180907	p32	1	1	926928	0.0780715	TRUE	4	49.3283
B03_5chr_p32_20180907	p32	1	2	669537	0.0919895	TRUE	3	46.7324
B04_5chr_p32_20180907	p32	1	3	1121085	0.139536	TRUE	4	57.0873
B05_5chr_p32_20180907	p32	1	4	586512	0.11244	TRUE	4	52.0717
B06_5chr_p32_20180907	p32	1	5	864114	0.10557	TRUE	5	75.3514
B07_5chr_p32_20180907	p32	1	6	641707	0.102657	TRUE	4	40.4385
B08_5chr_p32_20180907	p32	1	7	485996	0.133224	TRUE	3	33.0285
B09_5chr_p32_20180907	p32	1	8	966122	0.164554	TRUE	7	52.2917
B10_5chr_p32_20180907	p32	1	9	759298	0.140904	TRUE	3	33.9992
B11_5chr_p32_20180907	p32	1	10	184124	0.162521	TRUE	2	60.1469
B12_5chr_p32_20180907	p32	1	11	3387936	0.0842659	TRUE	5	131.547
B13_5chr_p32_20180907	p32	1	12	395108	0.12516	TRUE	2	24.2676
B14_5chr_p32_20180907	p32	1	13	928106	0.103813	TRUE	4	34.6016
B15_5chr_p32_20180907	p32	1	14	735362	0.105398	TRUE	3	73.1268
B16_5chr_p32_20180907	p32	1	15	429769	0.110463	TRUE	4	24.906
B17_5chr_p32_20180907	p32	1	16	511418	0.116517	TRUE	5	23.02
B18_5chr_p32_20180907	p32	1	17	623258	0.121821	TRUE	5	42.1238
B19_5chr_p32_20180907	p32	1	18	562896	0.135061	TRUE	2	75.409
B20_5chr_p32_20180907	p32	1	19	496789	0.179235	TRUE	5	27.7023
B21_5chr_p32_20180907	p32	1	20	474288	0.142908	TRUE	4	60.8933
B22_5chr_p32_20180907	p32	1	21	3453856	0.0856584	TRUE	5	68.2742
B23_5chr_p32_20180907	p32	1	22	2021471	0.102746	TRUE	6	13.8163
B24_5chr_p32_20180907	p32	1	23	728237	0.106769	TRUE	3	18.376
C01_5chr_p32_20180907	p32	2	0	645874	0.141482	TRUE	5	15.8675
C02_5chr_p32_20180907	p32	2	1	395305	0.131007	TRUE	2	18.968
C03_5chr_p32_20180907	p32	2	2	2627237	0.0967906	TRUE	4	60.491
C04_5chr_p32_20180907	p32	2	3	1569117	0.114983	TRUE	5	59.4708
C05_5chr_p32_20180907	p32	2	4	341848	0.200027	TRUE	3	14.4994
C06_5chr_p32_20180907	p32	2	5	2325463	0.105266	TRUE	5	108.469
C07_5chr_p32_20180907	p32	2	6	932178	0.139078	TRUE	4	12.6902
C08_5chr_p32_20180907	p32	2	7	1389767	0.139738	TRUE	4	16.8554
C09_5chr_p32_20180907	p32	2	8	649533	0.142982	TRUE	5	21.2602
C10_5chr_p32_20180907	p32	2	9	1304005	0.114148	TRUE	4	39.7681
C11_5chr_p32_20180907	p32	2	10	874907	0.13725	TRUE	4	43.1484
C12_5chr_p32_20180907	p32	2	11	768560	0.139372	TRUE	5	14.1088
C13_5chr_p32_20180907	p32	2	12	681880	0.181771	FALSE	4	4.45719
C14_5chr_p32_20180907	p32	2	13	684544	0.143903	TRUE	2	15.274
C15_5chr_p32_20180907	p32	2	14	902226	0.14728	TRUE	4	10.6952
C16_5chr_p32_20180907	p32	2	15	1249672	0.133824	TRUE	5	42.4757
C17_5chr_p32_20180907	p32	2	16	1074766	0.123416	TRUE	6	30.339
C18_5chr_p32_20180907	p32	2	17	915344	0.140971	TRUE	4	28.2344
C19_5chr_p32_20180907	p32	2	18	450281	0.181069	TRUE	4	17.4807
C20_5chr_p32_20180907	p32	2	19	767802	0.144868	TRUE	5	19.2115
C21_5chr_p32_20180907	p32	2	20	840568	0.128818	TRUE	3	52.1514
C22_5chr_p32_20180907	p32	2	21	722827	0.136821	TRUE	2	24.3886
C23_5chr_p32_20180907	p32	2	22	1224641	0.113083	TRUE	4	26.1172
C24_5chr_p32_20180907	p32	2	23	1880123	0.147351	TRUE	4	27.4441
D01_5chr_p32_20180907	p32	3	0	581731	0.165005	TRUE	5	25.1174
D02_5chr_p32_20180907	p32	3	1	837474	0.108357	TRUE	5	35.9298
D03_5chr_p32_20180907	p32	3	2	1046601	0.131791	TRUE	4	33.815
D04_5chr_p32_20180907	p32	3	3	298094	0.199183	TRUE	2	39.8027
D05_5chr_p32_20180907	p32	3	4	494573	0.166592	TRUE	3	35.8286
D06_5chr_p32_20180907	p32	3	5	570609	0.157667	TRUE	4	26.8169
D07_5chr_p32_20180907	p32	3	6	824109	0.134791	TRUE	4	35.4474
D08_5chr_p32_20180907	p32	3	7	1171018	0.150763	TRUE	5	26.5141
D09_5chr_p32_20180907	p32	3	8	688904	0.158447	TRUE	4	28.3792
D10_5chr_p32_20180907	p32	3	9	352802	0.202374	TRUE	4	16.1034
D11_5chr_p32_20180907	p32	3	10	1473162	0.118533	TRUE	5	50.5587
D12_5chr_p32_20180907	p32	3	11	1089740	0.13227	TRUE	5	31.5805
D13_5chr_p32_20180907	p32	3	12	461178	0.159654	TRUE	4	14.185
D14_5chr_p32_20180907	p32	3	13	502839	0.166535	TRUE	6	11.6078
D15_5chr_p32_20180907	p32	3	14	648499	0.159857	TRUE	3	64.1884
D16_5chr_p32_20180907	p32	3	15	813547	0.144954	TRUE	5	41.4174
D17_5chr_p32_20180907	p32	3	16	1390288	0.116235	TRUE	5	53.2465
D18_5chr_p32_20180907	p32	3	17	361442	0.167014	TRUE	4	12.032
D19_5chr_p32_20180907	p32	3	18	697815	0.152447	TRUE	6	30.5669
D20_5chr_p32_20180907	p32	3	19	483038	0.179737	TRUE	5	13.3575
D21_5chr_p32_20180907	p32	3	20	291542	0.18671	TRUE	4	20.3878
D22_5chr_p32_20180907	p32	3	21	2520892	0.0910049	TRUE	7	56.558
D23_5chr_p32_20180907	p32	3	22	1087174	0.130529	TRUE	4	52.3864
D24_5chr_p32_20180907	p32	3	23	930819	0.146165	TRUE	4	27.008
E01_5chr_p32_20180907	p32	4	0	287254	0.130842	TRUE	2	31.0296
E02_5chr_p32_20180907	p32	4	1	185047	0.135618	TRUE	3	16.0466
E03_5chr_p32_20180907	p32	4	2	602987	0.0982815	TRUE	5	37.5131
E04_5chr_p32_20180907	p32	4	3	134395	0.18611	TRUE	3	21.7733
E05_5chr_p32_20180907	p32	4	4	564386	0.120805	TRUE	3	123.989
E06_5chr_p32_20180907	p32	4	5	419706	0.108397	TRUE	5	40.7021
E07_5chr_p32_20180907	p32	4	6	278896	0.12823	TRUE	3	27.1223
E08_5chr_p32_20180907	p32	4	7	1081720	0.0994825	TRUE	3	84.2497
E09_5chr_p32_20180907	p32	4	8	518367	0.118187	TRUE	4	74.5558
E10_5chr_p32_20180907	p32	4	9	420775	0.142623	TRUE	5	68.3105
E11_5chr_p32_20180907	p32	4	10	191157	0.146195	TRUE	3	43.1979
E12_5chr_p32_20180907	p32	4	11	664212	0.118818	TRUE	5	29.8902
E13_5chr_p32_20180907	p32	4	12	333203	0.136906	TRUE	3	26.3748
E14_5chr_p32_20180907	p32	4	13	633335	0.107646	TRUE	4	56.5901
E15_5chr_p32_20180907	p32	4	14	290040	0.128709	TRUE	3	64.3933
E16_5chr_p32_20180907	p32	4	15	936568	0.0900157	TRUE	5	48.038
E17_5chr_p32_20180907	p32	4	16	1186032	0.10538	TRUE	3	125.69
E18_5chr_p32_20180907	p32	4	17	1080550	0.0999517	TRUE	4	58.2018
E19_5chr_p32_20180907	p32	4	18	1469323	0.110782	TRUE	5	67.0499
E20_5chr_p32_20180907	p32	4	19	942586	0.0950807	TRUE	3	52.7464
E21_5chr_p32_20180907	p32	4	20	667529	0.151778	TRUE	4	44.1866
E22_5chr_p32_20180907	p32	4	21	745309	0.120521	TRUE	5	29.5694
E23_5chr_p32_20180907	p32	4	22	391209	0.101365	TRUE	4	17.0647
E24_5chr_p32_20180907	p32	4	23	769566	0.084594	TRUE	4	33.4323
F01_5chr_p32_20180907	p32	5	0	100036	0.155284	TRUE	4	13.9003
F02_5chr_p32_20180907	p32	5	1	390514	0.0765354	TRUE	4	22.2162
F03_5chr_p32_20180907	p32	5	2	523203	0.108409	TRUE	4	81.5116
F04_5chr_p32_20180907	p32	5	3	253216	0.129897	TRUE	4	47.659
F05_5chr_p32_20180907	p32	5	4	515594	0.115011	TRUE	5	108.043
F06_5chr_p32_20180907	p32	5	5	233831	0.1232	TRUE	5	48.1916
F07_5chr_p32_20180907	p32	5	6	220631	0.139188	TRUE	2	57.2632
F08_5chr_p32_20180907	p32	5	7	165831	0.14254	TRUE	3	31.9653
F09_5chr_p32_20180907	p32	5	8	588180	0.0996998	TRUE	4	52.4828
F10_5chr_p32_20180907	p32	5	9	481967	0.128596	TRUE	5	82.8457
F11_5chr_p32_20180907	p32	5	10	214634	0.133797	TRUE	4	58.0493
F12_5chr_p32_20180907	p32	5	11	427198	0.120772	TRUE	6	40.2788
F13_5chr_p32_20180907	p32	5	12	438525	0.130437	TRUE	4	33.1958
F14_5chr_p32_20180907	p32	5	13	344017	0.11738	TRUE	5	22.7994
F15_5chr_p32_20180907	p32	5	14	736227	0.1295	TRUE	5	63.428
F16_5chr_p32_20180907	p32	5	15	629128	0.102724	TRUE	4	88.7079
F17_5chr_p32_20180907	p32	5	16	337648	0.108232	TRUE	4	53.3707
F18_5chr_p32_20180907	p32	5	17	723832	0.104431	TRUE	5	53.9893
F19_5chr_p32_20180907	p32	5	18	140400	0.172554	TRUE	2	29.2112
F20_5chr_p32_20180907	p32	5	19	275040	0.122958	TRUE	3	45.8688
F21_5chr_p32_20180907	p32	5	20	352214	0.128796	TRUE	4	41.0316
F22_5chr_p32_20180907	p32	5	21	607052	0.143671	TRUE	2	49.4369
F23_5chr_p32_20180907	p32	5	22	746935	0.0862212	TRUE	4	31.83
F24_5chr_p32_20180907	p32	5	23	638065	0.0872994	TRUE	4	25.0068
G01_5chr_p32_20180907	p32	6	0	312355	0.123773	TRUE	5	13.9509
G02_5chr_p32_20180907	p32	6	1	991395	0.0726506	TRUE	6	31.5901
G03_5chr_p32_20180907	p32	6	2	1120315	0.0902712	TRUE	5	67.542
G04_5chr_p32_20180907	p32	6	3	1025195	0.106037	TRUE	6	49.7046
G05_5chr_p32_20180907	p32	6	4	398774	0.12838	TRUE	4	21.9016
G06_5chr_p32_20180907	p32	6	5	453546	0.134946	TRUE	5	17.7364
G07_5chr_p32_20180907	p32	6	6	356748	0.121704	TRUE	4	18.307
G08_5chr_p32_20180907	p32	6	7	344515	0.124395	TRUE	4	28.6598
G09_5chr_p32_20180907	p32	6	8	362373	0.131501	TRUE	3	16.5358
G10_5chr_p32_20180907	p32	6	9	436169	0.145916	TRUE	5	16.8637
G11_5chr_p32_20180907	p32	6	10	445121	0.127512	TRUE	4	26.8453
G12_5chr_p32_20180907	p32	6	11	888456	0.106363	TRUE	5	38.8221
G13_5chr_p32_20180907	p32	6	12	387892	0.119709	TRUE	3	26.7609
G14_5chr_p32_20180907	p32	6	13	712631	0.111602	TRUE	5	20.9873
G15_5chr_p32_20180907	p32	6	14	374160	0.130943	TRUE	4	33.5726
G16_5chr_p32_20180907	p32	6	15	1174052	0.0920513	TRUE	5	76.668
G17_5chr_p32_20180907	p32	6	16	2656415	0.110694	FALSE	4	9.01152
G18_5chr_p32_20180907	p32	6	17	3170701	0.0983398	TRUE	4	16.9384
G19_5chr_p32_20180907	p32	6	18	621674	0.116031	TRUE	5	28.8565
G20_5chr_p32_20180907	p32	6	19	708034	0.116662	TRUE	4	54.2055
G21_5chr_p32_20180907	p32	6	20	962284	0.112944	TRUE	4	53.7508
G22_5chr_p32_20180907	p32	6	21	1031178	0.173044	TRUE	6	19.286
G23_5chr_p32_20180907	p32	6	22	1252497	0.0848111	TRUE	4	57.3753
G24_5chr_p32_20180907	p32	6	23	562242	0.108243	TRUE	5	15.4838
H01_5chr_p32_20180907	p32	7	0	285109	0.126708	TRUE	4	20.0438
H02_5chr_p32_20180907	p32	7	1	833233	0.0774419	TRUE	5	38.6292
H03_5chr_p32_20180907	p32	7	2	408216	0.0942204	TRUE	5	27.3601
H04_5chr_p32_20180907	p32	7	3	361434	0.144951	TRUE	6	23.844
H05_5chr_p32_20180907	p32	7	4	542274	0.120173	TRUE	3	57.3861
H06_5chr_p32_20180907	p32	7	5	315266	0.132637	TRUE	5	29.0747
H07_5chr_p32_20180907	p32	7	6	718478	0.116861	TRUE	5	52.0219
H08_5chr_p32_20180907	p32	7	7	258801	0.130625	TRUE	5	25.1232
H09_5chr_p32_20180907	p32	7	8	367040	0.120246	TRUE	4	38.8456
H10_5chr_p32_20180907	p32	7	9	408761	0.117282	TRUE	4	29.4482
H11_5chr_p32_20180907	p32	7	10	334843	0.119939	TRUE	3	27.2827
H12_5chr_p32_20180907	p32	7	11	433999	0.14451	TRUE	3	29.6465
H13_5chr_p32_20180907	p32	7	12	424134	0.13685	TRUE	6	25.0407
H14_5chr_p32_20180907	p32	7	13	417564	0.111715	TRUE	5	18.9623
H15_5chr_p32_20180907	p32	7	14	347661	0.148784	TRUE	3	95.8415
H16_5chr_p32_20180907	p32	7	15	243059	0.116908	TRUE	3	32.4301
H17_5chr_p32_20180907	p32	7	16	1209463	0.126323	TRUE	5	12.281
H18_5chr_p32_20180907	p32	7	17	1831080	0.111838	TRUE	4	10.0177
H19_5chr_p32_20180907	p32	7	18	251519	0.145574	TRUE	4	18.2894
H20_5chr_p32_20180907	p32	7	19	1017924	0.126059	TRUE	4	73.8225
H21_5chr_p32_20180907	p32	7	20	423094	0.133153	TRUE	4	55.2665
H22_5chr_p32_20180907	p32	7	21	415627	0.111372	TRUE	5	17.691
H23_5chr_p32_20180907	p32	7	22	507729	0.0792693	TRUE	5	25.2425
H24_5chr_p32_20180907	p32	7	23	856210	0.0969221	TRUE	4	42.1895
I01_5chr_p32_20180907	p32	8	0	981012	0.147757	FALSE	5	5.68019
I02_5chr_p32_20180907	p32	8	1	1723067	0.128095	TRUE	3	11.47
I03_5chr_p32_20180907	p32	8	2	815647	0.130744	TRUE	5	20.9181
I04_5chr_p32_20180907	p32	8	3	207476	0.153969	TRUE	4	25.3493
I05_5chr_p32_20180907	p32	8	4	268763	0.139072	TRUE	4	44.6454
I06_5chr_p32_20180907	p32	8	5	375969	0.133573	TRUE	4	43.6928
I07_5chr_p32_20180907	p32	8	6	238053	0.147669	TRUE	4	22.7003
I08_5chr_p32_20180907	p32	8	7	571730	0.134143	TRUE	4	41.1285
I09_5chr_p32_20180907	p32	8	8	701687	0.12495	TRUE	5	61.1021
I10_5chr_p32_20180907	p32	8	9	320423	0.147358	TRUE	6	23.0702
I11_5chr_p32_20180907	p32	8	10	215333	0.141914	TRUE	4	20.8494
I12_5chr_p32_20180907	p32	8	11	1152272	0.120255	TRUE	5	50.6488
I13_5chr_p32_20180907	p32	8	12	397977	0.132249	TRUE	5	24.6214
I14_5chr_p32_20180907	p32	8	13	470205	0.133219	TRUE	5	21.4055
I15_5chr_p32_20180907	p32	8	14	344830	0.127465	TRUE	5	44.9932
I16_5chr_p32_20180907	p32	8	15	1080279	0.116491	TRUE	6	103.843
I17_5chr_p32_20180907	p32	8	16	291804	0.139374	TRUE	3	16.3242
I18_5chr_p32_20180907	p32	8	17	140966	0.136807	TRUE	3	14.3048
I19_5chr_p32_20180907	p32	8	18	879754	0.116398	TRUE	5	58.1433
I20_5chr_p32_20180907	p32	8	19	806297	0.141391	TRUE	4	94.2384
I21_5chr_p32_20180907	p32	8	20	198794	0.153751	TRUE	4	24.1572
I22_5chr_p32_20180907	p32	8	21	889107	0.106614	TRUE	3	114.153
I23_5chr_p32_20180907	p32	8	22	1242862	0.0925255	TRUE	3	74.9369
I24_5chr_p32_20180907	p32	8	23	237668	0.124463	TRUE	4	25.745
J01_5chr_p32_20180907	p32	9	0	1387404	0.126697	FALSE	5	7.32131
J02_5chr_p32_20180907	p32	9	1	1371555	0.131171	TRUE	4	10.1361
J03_5chr_p32_20180907	p32	9	2	448969	0.144427	TRUE	4	22.2474
J04_5chr_p32_20180907	p32	9	3	377890	0.149098	TRUE	4	26.1752
J05_5chr_p32_20180907	p32	9	4	509482	0.130725	TRUE	5	26.923
J06_5chr_p32_20180907	p32	9	5	326505	0.144737	TRUE	5	19.2016
J07_5chr_p32_20180907	p32	9	6	351783	0.151864	TRUE	4	16.1666
J08_5chr_p32_20180907	p32	9	7	301196	0.15389	TRUE	3	14.1095
J09_5chr_p32_20180907	p32	9	8	454569	0.129425	TRUE	5	23.4254
J10_5chr_p32_20180907	p32	9	9	611864	0.129685	TRUE	3	58.1985
J11_5chr_p32_20180907	p32	9	10	944468	0.119157	TRUE	6	28.8374
J12_5chr_p32_20180907	p32	9	11	4046420	0.1139	FALSE	7	2.41496
J13_5chr_p32_20180907	p32	9	12	877627	0.11906	TRUE	4	30.7526
J14_5chr_p32_20180907	p32	9	13	372092	0.140744	TRUE	4	13.3699
J15_5chr_p32_20180907	p32	9	14	449083	0.139692	TRUE	4	35.4585
J16_5chr_p32_20180907	p32	9	15	510573	0.139887	TRUE	2	108.94
J17_5chr_p32_20180907	p32	9	16	836745	0.111375	TRUE	4	51.7301
J18_5chr_p32_20180907	p32	9	17	565632	0.1119	TRUE	4	38.9178
J19_5chr_p32_20180907	p32	9	18	740958	0.117893	TRUE	5	31.7681
J20_5chr_p32_20180907	p32	9	19	433464	0.140599	TRUE	4	15.8699
J21_5chr_p32_20180907	p32	9	20	440810	0.153123	TRUE	5	29.6217
J22_5chr_p32_20180907	p32	9	21	955042	0.123515	TRUE	2	41.5806
J23_5chr_p32_20180907	p32	9	22	581024	0.109189	TRUE	2	37.4908
J24_5chr_p32_20180907	p32	9	23	560429	0.118384	TRUE	2	41.9655
K01_5chr_p32_20180907	p32	10	0	348260	0.125926	FALSE	4	9.75029
K02_5chr_p32_20180907	p32	10	1	310729	0.138995	TRUE	3	10.5181
K03_5chr_p32_20180907	p32	10	2	294548	0.147565	TRUE	5	15.4165
K04_5chr_p32_20180907	p32	10	3	157636	0.179834	TRUE	2	18.6482
K05_5chr_p32_20180907	p32	10	4	431796	0.134145	TRUE	5	40.908
K06_5chr_p32_20180907	p32	10	5	253992	0.145595	TRUE	2	15.0024
K07_5chr_p32_20180907	p32	10	6	1937594	0.108258	TRUE	1	13.4399
K08_5chr_p32_20180907	p32	10	7	1643065	0.117101	FALSE	3	1.85882
K09_5chr_p32_20180907	p32	10	8	669322	0.112309	TRUE	4	17.0152
K10_5chr_p32_20180907	p32	10	9	502824	0.132011	TRUE	3	38.929
K11_5chr_p32_20180907	p32	10	10	556788	0.118814	TRUE	4	28.6735
K12_5chr_p32_20180907	p32	10	11	447312	0.146382	FALSE	5	9.574
K13_5chr_p32_20180907	p32	10	12	9316109	0.0959841	FALSE	4	1.5178
K14_5chr_p32_20180907	p32	10	13	16551093	0.094128	FALSE	2	1.88978
K15_5chr_p32_20180907	p32	10	14	507458	0.143035	TRUE	6	26.4085
K16_5chr_p32_20180907	p32	10	15	366325	0.150403	TRUE	4	16.8698
K17_5chr_p32_20180907	p32	10	16	405921	0.130456	TRUE	3	17.9201
K18_5chr_p32_20180907	p32	10	17	805765	0.156496	TRUE	5	15.0849
K19_5chr_p32_20180907	p32	10	18	750737	0.121872	FALSE	4	8.82524
K20_5chr_p32_20180907	p32	10	19	587026	0.145506	TRUE	5	15.107
K21_5chr_p32_20180907	p32	10	20	345230	0.169986	TRUE	5	14.8205
K22_5chr_p32_20180907	p32	10	21	387051	0.179114	FALSE	4	8.42279
K23_5chr_p32_20180907	p32	10	22	832539	0.125219	TRUE	5	20.5717
K24_5chr_p32_20180907	p32	10	23	422085	0.127705	TRUE	4	10.7706
L01_5chr_p32_20180907	p32	11	0	1557978	0.0888535	TRUE	4	20.1691
L02_5chr_p32_20180907	p32	11	1	510225	0.130705	TRUE	5	12.3436
L03_5chr_p32_20180907	p32	11	2	434456	0.118836	TRUE	3	16.3786
L04_5chr_p32_20180907	p32	11	3	300229	0.146641	FALSE	5	6.81133
L05_5chr_p32_20180907	p32	11	4	410961	0.114122	TRUE	4	15.6534
L06_5chr_p32_20180907	p32	11	5	520548	0.132959	TRUE	4	24.8612
L07_5chr_p32_20180907	p32	11	6	6689817	0.0961628	FALSE	2	2.19997
L08_5chr_p32_20180907	p32	11	7	2066061	0.110859	FALSE	2	4.80605
L09_5chr_p32_20180907	p32	11	8	749093	0.105876	TRUE	5	20.3059
L10_5chr_p32_20180907	p32	11	9	598863	0.123532	TRUE	4	22.5034
L11_5chr_p32_20180907	p32	11	10	365730	0.150829	TRUE	5	10.7721
L12_5chr_p32_20180907	p32	11	11	682438	0.131145	TRUE	4	18.2527
L13_5chr_p32_20180907	p32	11	12	17331850	0.0880496	FALSE	1	1.94944
L14_5chr_p32_20180907	p32	11	13	20277242	0.090851	FALSE	1	1.73032
L15_5chr_p32_20180907	p32	11	14	315027	0.153123	TRUE	3	10.0092
L16_5chr_p32_20180907	p32	11	15	1004406	0.120311	TRUE	5	20.0148
L17_5chr_p32_20180907	p32	11	16	1095077	0.101164	TRUE	4	22.1205
L18_5chr_p32_20180907	p32	11	17	426309	0.166505	FALSE	4	7.33216
L19_5chr_p32_20180907	p32	11	18	405910	0.143608	TRUE	3	14.6978
L20_5chr_p32_20180907	p32	11	19	353776	0.138671	TRUE	3	12.0277
L21_5chr_p32_20180907	p32	11	20	533591	0.167773	TRUE	3	27.5344
L22_5chr_p32_20180907	p32	11	21	721432	0.174722	TRUE	4	10.3648
L23_5chr_p32_20180907	p32	11	22	629672	0.128349	TRUE	3	19.1076
L24_5chr_p32_20180907	p32	11	23	684505	0.126219	FALSE	5	8.44324
M01_5chr_p32_20180907	p32	12	0	373976	0.113582	TRUE	3	45.7058
M02_5chr_p32_20180907	p32	12	1	823113	0.0861311	TRUE	5	48.7374
M03_5chr_p32_20180907	p32	12	2	425580	0.115696	TRUE	2	140.488
M04_5chr_p32_20180907	p32	12	3	200498	0.136567	TRUE	3	45.937
M05_5chr_p32_20180907	p32	12	4	370571	0.131869	TRUE	5	23.1908
M06_5chr_p32_20180907	p32	12	5	410759	0.132226	TRUE	5	23.852
M07_5chr_p32_20180907	p32	12	6	571258	0.11798	TRUE	5	34.5219
M08_5chr_p32_20180907	p32	12	7	234533	0.145879	TRUE	3	26.1359
M09_5chr_p32_20180907	p32	12	8	241510	0.12779	TRUE	3	22.9243
M10_5chr_p32_20180907	p32	12	9	113806	0.158977	FALSE	2	9.13621
M11_5chr_p32_20180907	p32	12	10	2378148	0.138868	FALSE	5	6.26168
M12_5chr_p32_20180907	p32	12	11	2392708	0.145576	FALSE	4	5.5964
M13_5chr_p32_20180907	p32	12	12	473385	0.124016	TRUE	4	23.1164
M14_5chr_p32_20180907	p32	12	13	440477	0.122347	TRUE	3	46.0454
M15_5chr_p32_20180907	p32	12	14	335174	0.136168	TRUE	4	67.1672
M16_5chr_p32_20180907	p32	12	15	335052	0.111601	TRUE	4	35.6942
M17_5chr_p32_20180907	p32	12	16	463545	0.126566	TRUE	5	40.3981
M18_5chr_p32_20180907	p32	12	17	420480	0.175997	TRUE	4	14.4634
M19_5chr_p32_20180907	p32	12	18	376826	0.123234	TRUE	4	31.5911
M20_5chr_p32_20180907	p32	12	19	464034	0.121759	TRUE	3	59.0845
M21_5chr_p32_20180907	p32	12	20	199953	0.13945	TRUE	3	45.9857
M22_5chr_p32_20180907	p32	12	21	536066	0.103252	TRUE	4	38.631
M23_5chr_p32_20180907	p32	12	22	262194	0.145303	TRUE	6	13.4431
M24_5chr_p32_20180907	p32	12	23	776976	0.0865473	TRUE	4	54.0056
N01_5chr_p32_20180907	p32	13	0	781631	0.118669	TRUE	4	50.4825
N02_5chr_p32_20180907	p32	13	1	377255	0.121355	TRUE	4	34.4013
N03_5chr_p32_20180907	p32	13	2	281159	0.11283	TRUE	5	33.5787
N04_5chr_p32_20180907	p32	13	3	352020	0.135608	TRUE	5	34.154
N05_5chr_p32_20180907	p32	13	4	546343	0.122322	TRUE	5	28.4139
N06_5chr_p32_20180907	p32	13	5	602977	0.136332	TRUE	5	27.8923
N07_5chr_p32_20180907	p32	13	6	497921	0.132746	TRUE	3	58.3603
N08_5chr_p32_20180907	p32	13	7	288400	0.137226	TRUE	4	27.0239
N09_5chr_p32_20180907	p32	13	8	416308	0.114639	TRUE	5	23.2294
N10_5chr_p32_20180907	p32	13	9	936310	0.111672	TRUE	6	36.9737
N11_5chr_p32_20180907	p32	13	10	2049435	0.146216	FALSE	3	6.09523
N12_5chr_p32_20180907	p32	13	11	1453648	0.148651	FALSE	4	3.51042
N13_5chr_p32_20180907	p32	13	12	269283	0.173658	TRUE	2	23.1183
N14_5chr_p32_20180907	p32	13	13	292954	0.136078	TRUE	3	18.0082
N15_5chr_p32_20180907	p32	13	14	282838	0.122736	TRUE	4	35.5423
N16_5chr_p32_20180907	p32	13	15	386623	0.115089	TRUE	4	54.1775
N17_5chr_p32_20180907	p32	13	16	217380	0.124109	TRUE	3	23.2329
N18_5chr_p32_20180907	p32	13	17	352662	0.151471	TRUE	4	26.6553
N19_5chr_p32_20180907	p32	13	18	519784	0.111634	TRUE	4	66.0632
N20_5chr_p32_20180907	p32	13	19	490437	0.112027	TRUE	5	44.4106
N21_5chr_p32_20180907	p32	13	20	270374	0.138565	TRUE	5	27.0764
N22_5chr_p32_20180907	p32	13	21	365896	0.117757	TRUE	4	32.2306
N23_5chr_p32_20180907	p32	13	22	311757	0.131789	TRUE	4	37.0838
N24_5chr_p32_20180907	p32	13	23	2200351	0.0783667	TRUE	5	82.3544
O01_5chr_p32_20180907	p32	14	0	1242587	0.0940264	TRUE	5	34.2201
O02_5chr_p32_20180907	p32	14	1	2408833	0.0750273	TRUE	5	63.3617
O03_5chr_p32_20180907	p32	14	2	813048	0.0974548	TRUE	3	19.9953
O04_5chr_p32_20180907	p32	14	3	1081827	0.100382	TRUE	5	73.6657
O05_5chr_p32_20180907	p32	14	4	427818	0.112198	TRUE	5	37.016
O06_5chr_p32_20180907	p32	14	5	313904	0.124014	TRUE	5	19.6413
O07_5chr_p32_20180907	p32	14	6	208666	0.14682	TRUE	3	19.9726
O08_5chr_p32_20180907	p32	14	7	341090	0.134846	TRUE	4	23.9042
O09_5chr_p32_20180907	p32	14	8	213690	0.126793	TRUE	4	15.2204
O10_5chr_p32_20180907	p32	14	9	406156	0.120901	TRUE	2	57.841
O11_5chr_p32_20180907	p32	14	10	568891	0.110384	TRUE	5	28.7777
O12_5chr_p32_20180907	p32	14	11	301624	0.150735	TRUE	1	37.6054
O13_5chr_p32_20180907	p32	14	12	1217724	0.114403	TRUE	4	23.7332
O14_5chr_p32_20180907	p32	14	13	772946	0.138913	TRUE	3	12.5409
O15_5chr_p32_20180907	p32	14	14	173174	0.145792	TRUE	3	14.6244
O16_5chr_p32_20180907	p32	14	15	257362	0.132274	TRUE	3	35.3916
O17_5chr_p32_20180907	p32	14	16	1324880	0.087212	TRUE	4	56.6627
O18_5chr_p32_20180907	p32	14	17	419138	0.104345	TRUE	2	43.7862
O19_5chr_p32_20180907	p32	14	18	467312	0.124608	TRUE	4	34.849
O20_5chr_p32_20180907	p32	14	19	630102	0.19995	TRUE	4	21.3191
O21_5chr_p32_20180907	p32	14	20	188535	0.144436	TRUE	4	14.8871
O22_5chr_p32_20180907	p32	14	21	1025666	0.102429	TRUE	5	37.7787
O23_5chr_p32_20180907	p32	14	22	1208130	0.0878834	TRUE	4	16.9904
O24_5chr_p32_20180907	p32	14	23	818577	0.0949585	TRUE	6	20.8442
P01_5chr_p32_20180907	p32	15	0	50471	0.177815	FALSE	2	3.7966
P02_5chr_p32_20180907	p32	15	1	342875	0.108815	TRUE	5	11.2332
P03_5chr_p32_20180907	p32	15	2	554271	0.106262	TRUE	5	40.8844
P04_5chr_p32_20180907	p32	15	3	613688	0.0915788	TRUE	6	39.4209
P05_5chr_p32_20180907	p32	15	4	114685	0.142588	TRUE	3	11.1425
P06_5chr_p32_20180907	p32	15	5	409817	0.120602	TRUE	5	35.4836
P07_5chr_p32_20180907	p32	15	6	534772	0.114059	TRUE	4	16.0047
P08_5chr_p32_20180907	p32	15	7	401933	0.119035	TRUE	6	14.7322
P09_5chr_p32_20180907	p32	15	8	325307	0.125508	TRUE	5	24.7389
P10_5chr_p32_20180907	p32	15	9	212359	0.133842	TRUE	5	16.3835
P11_5chr_p32_20180907	p32	15	10	475090	0.12358	TRUE	5	24.9564
P12_5chr_p32_20180907	p32	15	11	181911	0.160844	TRUE	3	11.9429
P13_5chr_p32_20180907	p32	15	12	873303	0.116874	TRUE	3	19.2198
P14_5chr_p32_20180907	p32	15	13	489075	0.143103	TRUE	3	13.2832
P15_5chr_p32_20180907	p32	15	14	907851	0.102795	TRUE	4	77.6446
P16_5chr_p32_20180907	p32	15	15	796815	0.103923	TRUE	4	78.1841
P17_5chr_p32_20180907	p32	15	16	243948	0.12369	TRUE	3	14.6685
P18_5chr_p32_20180907	p32	15	17	512043	0.0866954	TRUE	4	35.5408
P19_5chr_p32_20180907	p32	15	18	179646	0.160275	TRUE	4	14.6856
P20_5chr_p32_20180907	p32	15	19	342351	0.108341	TRUE	3	38.4164
P21_5chr_p32_20180907	p32	15	20	505009	0.109993	TRUE	6	41.9717
P22_5chr_p32_20180907	p32	15	21	1317419	0.0734806	TRUE	5	41.1357
P23_5chr_p32_20180907	p32	15	22	918032	0.10022	TRUE	4	55.8116
P24_5chr_p32_20180907	p32	15	23	720048	0.0728366	TRUE	3	34.8064
A01_5chr_p33_20180907	p33	0	0	905511	0.144529	TRUE	4	143.022	18256
A02_5chr_p33_20180907	p33	0	1	339367	0.139466	TRUE	2	86.8137	6464
A03_5chr_p33_20180907	p33	0	2	459826	0.153738	TRUE	3	78.5577	9817
A04_5chr_p33_20180907	p33	0	3	506092	0.153485	TRUE	4	63.6573	11657
A05_5chr_p33_20180907	p33	0	4	365643	0.172824	TRUE	4	62.9736	11819
A06_5chr_p33_20180907	p33	0	5	901962	0.144096	TRUE	5	86.1904	18239
A07_5chr_p33_20180907	p33	0	6	523888	0.148586	TRUE	4	45.8683	10259
A08_5chr_p33_20180907	p33	0	7	389336	0.170646	TRUE	5	51.7258	10067
A09_5chr_p33_20180907	p33	0	8	592833	0.146707	TRUE	4	66.5375	14774
A10_5chr_p33_20180907	p33	0	9	748497	0.176646	TRUE	5	81.5632	19990
A11_5chr_p33_20180907	p33	0	10	422297	0.167873	TRUE	4	61.8528	11816
A12_5chr_p33_20180907	p33	0	11	771420	0.148386	TRUE	5	62.8361	16371
A13_5chr_p33_20180907	p33	0	12	460693	0.156688	TRUE	4	32.2206	11358
A14_5chr_p33_20180907	p33	0	13	1094709	0.136725	TRUE	6	49.8092	19615
A15_5chr_p33_20180907	p33	0	14	459030	0.1777	TRUE	4	65.1795	11762
A16_5chr_p33_20180907	p33	0	15	767023	0.137516	TRUE	3	63.6851	12224
A17_5chr_p33_20180907	p33	0	16	525641	0.162361	TRUE	5	38.6809	12281
A18_5chr_p33_20180907	p33	0	17	550119	0.130031	TRUE	5	27.0871	10550
A19_5chr_p33_20180907	p33	0	18	926554	0.146883	TRUE	4	69.5655	15979
A20_5chr_p33_20180907	p33	0	19	416823	0.145707	TRUE	2	90.8831	8107
A21_5chr_p33_20180907	p33	0	20	365305	0.134939	TRUE	3	41.5128	4970
A22_5chr_p33_20180907	p33	0	21	1111943	0.10842	TRUE	5	44.1864	11877
A23_5chr_p33_20180907	p33	0	22	1017733	0.131917	TRUE	7	24.4151	15539
A24_5chr_p33_20180907	p33	0	23	499319	0.126262	TRUE	3	19.2776	6112
B01_5chr_p33_20180907	p33	1	0	475694	0.149045	TRUE	2	121.392	10120
B02_5chr_p33_20180907	p33	1	1	926649	0.134375	TRUE	4	102.46	16259
B03_5chr_p33_20180907	p33	1	2	351887	0.139974	TRUE	2	65.8175	6163
B04_5chr_p33_20180907	p33	1	3	455608	0.172489	TRUE	3	107.211	12073
B05_5chr_p33_20180907	p33	1	4	450510	0.165206	TRUE	4	84.0682	12282
B06_5chr_p33_20180907	p33	1	5	801044	0.161149	TRUE	4	97.2552	21265
B07_5chr_p33_20180907	p33	1	6	869935	0.164965	TRUE	5	93.8572	23616
B08_5chr_p33_20180907	p33	1	7	781720	0.163813	TRUE	5	72.5184	18835
B09_5chr_p33_20180907	p33	1	8	908148	0.160591	TRUE	5	76.062	25679
B10_5chr_p33_20180907	p33	1	9	1079109	0.167081	TRUE	5	128.637	29668
B11_5chr_p33_20180907	p33	1	10	939346	0.161803	TRUE	6	91.9532	23698
B12_5chr_p33_20180907	p33	1	11	794518	0.155789	TRUE	4	79.7931	18216
B13_5chr_p33_20180907	p33	1	12	1301726	0.148245	TRUE	5	75.7325	26739
B14_5chr_p33_20180907	p33	1	13	947966	0.141949	TRUE	4	86.7398	20466
B15_5chr_p33_20180907	p33	1	14	692479	0.168222	TRUE	5	83.2478	15708
B16_5chr_p33_20180907	p33	1	15	381722	0.190271	TRUE	4	62.3514	12411
B17_5chr_p33_20180907	p33	1	16	972033	0.147184	TRUE	4	61.2729	17633
B18_5chr_p33_20180907	p33	1	17	370349	0.171818	TRUE	5	65.2396	10343
B19_5chr_p33_20180907	p33	1	18	782785	0.179929	TRUE	5	76.0745	17040
B20_5chr_p33_20180907	p33	1	19	640022	0.179871	TRUE	7	54.8566	16093
B21_5chr_p33_20180907	p33	1	20	554621	0.173579	TRUE	3	104.605	14263
B22_5chr_p33_20180907	p33	1	21	379616	0.161179	TRUE	2	73.7272	9214
B23_5chr_p33_20180907	p33	1	22	435174	0.159812	TRUE	2	51.6047	7176
B24_5chr_p33_20180907	p33	1	23	642633	0.137358	TRUE	4	47.4013	11054
C01_5chr_p33_20180907	p33	2	0	636360	0.188247	TRUE	3	46.8605	10049
C02_5chr_p33_20180907	p33	2	1	720080	0.174114	TRUE	3	64.6667	9614
C03_5chr_p33_20180907	p33	2	2	1458133	0.144031	TRUE	5	82.2343	21011
C04_5chr_p33_20180907	p33	2	3	971975	0.185947	TRUE	5	59.1668	20415
C05_5chr_p33_20180907	p33	2	4	430180	0.211366	TRUE	4	30.3198	10234
C06_5chr_p33_20180907	p33	2	5	629483	0.205222	TRUE	4	52.552	14732
C07_5chr_p33_20180907	p33	2	6	815421	0.186213	TRUE	4	28.3574	13883
C08_5chr_p33_20180907	p33	2	7	1101567	0.193202	TRUE	5	26.1949	22774
C09_5chr_p33_20180907	p33	2	8	890002	0.169852	TRUE	4	52.9341	17796
C10_5chr_p33_20180907	p33	2	9	711846	0.195085	TRUE	5	48.5157	16912
C11_5chr_p33_20180907	p33	2	10	1055348	0.186612	TRUE	6	59.1801	27008
C12_5chr_p33_20180907	p33	2	11	862613	0.178556	TRUE	3	47.7491	15207
C13_5chr_p33_20180907	p33	2	12	1104057	0.155979	TRUE	6	29.6237	19104
C14_5chr_p33_20180907	p33	2	13	1181756	0.162613	TRUE	5	49.4613	25186
C15_5chr_p33_20180907	p33	2	14	1099098	0.170841	TRUE	5	76.5966	23279
C16_5chr_p33_20180907	p33	2	15	881504	0.17213	TRUE	4	55.8262	18031
C17_5chr_p33_20180907	p33	2	16	671230	0.184327	TRUE	4	46.8939	12432
C18_5chr_p33_20180907	p33	2	17	799653	0.180792	TRUE	5	39.0146	15960
C19_5chr_p33_20180907	p33	2	18	626871	0.199328	TRUE	4	46.7162	14671
C20_5chr_p33_20180907	p33	2	19	513807	0.20908	TRUE	3	67.3434	11564
C21_5chr_p33_20180907	p33	2	20	395406	0.227355	TRUE	4	34.2283	6869
C22_5chr_p33_20180907	p33	2	21	261082	0.278353	TRUE	1	32.6349	2443
C23_5chr_p33_20180907	p33	2	22	419120	0.243823	TRUE	2	57.3535	6493
C24_5chr_p33_20180907	p33	2	23	951747	0.161051	TRUE	4	53.6876	13893
D01_5chr_p33_20180907	p33	3	0	461586	0.233209	TRUE	3	39.2345	10196
D02_5chr_p33_20180907	p33	3	1	1172220	0.147069	TRUE	3	58.5505	14648
D03_5chr_p33_20180907	p33	3	2	1002173	0.189095	TRUE	5	29.7415	18091
D04_5chr_p33_20180907	p33	3	3	465568	0.215466	TRUE	3	47.9144	11633
D05_5chr_p33_20180907	p33	3	4	493476	0.22521	TRUE	4	47.4885	11382
D06_5chr_p33_20180907	p33	3	5	882250	0.190311	TRUE	4	54.9678	17135
D07_5chr_p33_20180907	p33	3	6	1363686	0.184853	TRUE	5	39.9163	18892
D08_5chr_p33_20180907	p33	3	7	1024488	0.202115	TRUE	4	30.4304	16001
D09_5chr_p33_20180907	p33	3	8	2052286	0.147464	TRUE	4	60.2278	33844
D10_5chr_p33_20180907	p33	3	9	712587	0.197059	TRUE	4	39.2104	14707
D11_5chr_p33_20180907	p33	3	10	1744090	0.172194	TRUE	6	50.8244	35646
D12_5chr_p33_20180907	p33	3	11	1121141	0.173287	TRUE	4	51.4933	22627
D13_5chr_p33_20180907	p33	3	12	1211859	0.157277	TRUE	4	30.8286	21466
D14_5chr_p33_20180907	p33	3	13	1830935	0.146684	TRUE	5	59.4207	30859
D15_5chr_p33_20180907	p33	3	14	1600024	0.184996	TRUE	5	61.2389	34164
D16_5chr_p33_20180907	p33	3	15	1145794	0.164991	TRUE	4	54.0727	24030
D17_5chr_p33_20180907	p33	3	16	1281586	0.160968	TRUE	5	55.6535	25302
D18_5chr_p33_20180907	p33	3	17	929151	0.172178	TRUE	2	61.8013	16381
D19_5chr_p33_20180907	p33	3	18	1289944	0.176242	TRUE	5	49.6864	26000
D20_5chr_p33_20180907	p33	3	19	940044	0.183609	TRUE	6	41.5831	20759
D21_5chr_p33_20180907	p33	3	20	681912	0.205891	TRUE	5	35.5892	14005
D22_5chr_p33_20180907	p33	3	21	5878530	0.135278	FALSE	2	2.51982
D23_5chr_p33_20180907	p33	3	22	842126	0.18985	TRUE	2	78.6728	14780
D24_5chr_p33_20180907	p33	3	23	736108	0.184167	TRUE	3	34.3982	9436
E01_5chr_p33_20180907	p33	4	0	455881	0.140695	TRUE	3	120.191	9889
E02_5chr_p33_20180907	p33	4	1	409328	0.153286	TRUE	3	57.994	7480
E03_5chr_p33_20180907	p33	4	2	493986	0.150163	TRUE	3	82.8136	11938
E04_5chr_p33_20180907	p33	4	3	419266	0.186755	TRUE	3	69.8268	13198
E05_5chr_p33_20180907	p33	4	4	756601	0.171545	TRUE	6	84.7894	20920
E06_5chr_p33_20180907	p33	4	5	777020	0.168477	TRUE	5	122.582	22458
E07_5chr_p33_20180907	p33	4	6	828117	0.164904	TRUE	5	70.4783	23849
E08_5chr_p33_20180907	p33	4	7	683279	0.163092	TRUE	5	71.6463	18373
E09_5chr_p33_20180907	p33	4	8	1130358	0.151967	TRUE	5	73.659	27283
E10_5chr_p33_20180907	p33	4	9	282050	0.201782	TRUE	2	122.325	7862
E11_5chr_p33_20180907	p33	4	10	594333	0.167238	TRUE	5	55.7761	13114
E12_5chr_p33_20180907	p33	4	11	742802	0.160884	TRUE	5	91.4705	19256
E13_5chr_p33_20180907	p33	4	12	973550	0.142132	TRUE	2	166.607	22162
E14_5chr_p33_20180907	p33	4	13	869014	0.156722	TRUE	5	56.5991	20212
E15_5chr_p33_20180907	p33	4	14	614349	0.182021	TRUE	5	103.06	19040
E16_5chr_p33_20180907	p33	4	15	683273	0.153973	TRUE	5	65.516	16242
E17_5chr_p33_20180907	p33	4	16	786395	0.168678	TRUE	5	87.7725	22166
E18_5chr_p33_20180907	p33	4	17	873900	0.135571	TRUE	4	95.8979	15025
E19_5chr_p33_20180907	p33	4	18	1040183	0.155547	TRUE	6	82.2085	25136
E20_5chr_p33_20180907	p33	4	19	908713	0.144958	TRUE	4	105.097	18684
E21_5chr_p33_20180907	p33	4	20	502528	0.173122	TRUE	4	84.0414	14749
E22_5chr_p33_20180907	p33	4	21	939001	0.134249	TRUE	3	79.6337	16572
E23_5chr_p33_20180907	p33	4	22	250215	0.153414	TRUE	2	32.028	5020
E24_5chr_p33_20180907	p33	4	23	330747	0.121172	TRUE	1	66.5578	4720
F01_5chr_p33_20180907	p33	5	0	252852	0.179464	TRUE	2	117.237	5898
F02_5chr_p33_20180907	p33	5	1	528841	0.143319	TRUE	3	104.106	11336
F03_5chr_p33_20180907	p33	5	2	552048	0.177846	TRUE	5	115.928	15673
F04_5chr_p33_20180907	p33	5	3	635476	0.184449	TRUE	4	165.021	17662
F05_5chr_p33_20180907	p33	5	4	1057454	0.178175	TRUE	5	129.796	27125
F06_5chr_p33_20180907	p33	5	5	865318	0.18469	TRUE	7	93.2749	23775
F07_5chr_p33_20180907	p33	5	6	936303	0.169679	TRUE	4	121.442	24432
F08_5chr_p33_20180907	p33	5	7	544239	0.17487	TRUE	4	69.6911	14208
F09_5chr_p33_20180907	p33	5	8	1122835	0.142372	TRUE	5	92.2809	23496
F10_5chr_p33_20180907	p33	5	9	892614	0.172045	TRUE	5	93.3033	20791
F11_5chr_p33_20180907	p33	5	10	1574450	0.156701	TRUE	5	159.006	35299
F12_5chr_p33_20180907	p33	5	11	1166100	0.159468	TRUE	5	117.591	28093
F13_5chr_p33_20180907	p33	5	12	829601	0.171917	TRUE	5	84.3721	18990
F14_5chr_p33_20180907	p33	5	13	763624	0.165198	TRUE	5	53.4407	19875
F15_5chr_p33_20180907	p33	5	14	385988	0.194636	TRUE	3	125.305	10621
F16_5chr_p33_20180907	p33	5	15	491144	0.164967	TRUE	3	94.3063	12745
F17_5chr_p33_20180907	p33	5	16	805010	0.156411	TRUE	5	77.7476	19775
F18_5chr_p33_20180907	p33	5	17	577040	0.164098	TRUE	4	61.9165	13462
F19_5chr_p33_20180907	p33	5	18	789597	0.178047	TRUE	4	90.1629	23072
F20_5chr_p33_20180907	p33	5	19	598041	0.175255	TRUE	4	97.0671	16571
F21_5chr_p33_20180907	p33	5	20	537409	0.173736	TRUE	4	67.3435	11620
F22_5chr_p33_20180907	p33	5	21	653881	0.157056	TRUE	4	49.5053	13888
F23_5chr_p33_20180907	p33	5	22	685928	0.163751	TRUE	5	66.0676	19156
F24_5chr_p33_20180907	p33	5	23	557514	0.145829	TRUE	4	44.2942	14145
G01_5chr_p33_20180907	p33	6	0	188175	0.158729	TRUE	2	31.4487	4223
G02_5chr_p33_20180907	p33	6	1	763974	0.0994831	TRUE	2	80.887	9266
G03_5chr_p33_20180907	p33	6	2	485045	0.165675	TRUE	4	71.0778	9915
G04_5chr_p33_20180907	p33	6	3	411096	0.188009	TRUE	3	80.8229	10669
G05_5chr_p33_20180907	p33	6	4	880431	0.171259	TRUE	5	73.589	23252
G06_5chr_p33_20180907	p33	6	5	581249	0.181412	TRUE	4	63.5887	17254
G07_5chr_p33_20180907	p33	6	6	472804	0.165365	TRUE	5	61.505	13212
G08_5chr_p33_20180907	p33	6	7	541847	0.18098	TRUE	4	93.9757	15984
G09_5chr_p33_20180907	p33	6	8	880286	0.158901	TRUE	4	79.6548	23941
G10_5chr_p33_20180907	p33	6	9	471421	0.185057	TRUE	5	60.8857	14331
G11_5chr_p33_20180907	p33	6	10	742205	0.161997	TRUE	4	70.3326	18349
G12_5chr_p33_20180907	p33	6	11	949485	0.169533	TRUE	6	74.3285	26596
G13_5chr_p33_20180907	p33	6	12	633682	0.178371	TRUE	4	92.0267	17031
G14_5chr_p33_20180907	p33	6	13	1117639	0.145065	TRUE	5	42.2218	24814
G15_5chr_p33_20180907	p33	6	14	843750	0.154406	TRUE	4	112.222	18898
G16_5chr_p33_20180907	p33	6	15	1034416	0.157799	TRUE	3	105.314	26308
G17_5chr_p33_20180907	p33	6	16	1549939	0.144202	TRUE	5	51.9028	30928
G18_5chr_p33_20180907	p33	6	17	1321072	0.144411	TRUE	4	36.3625	19628
G19_5chr_p33_20180907	p33	6	18	986899	0.169454	TRUE	5	85.9324	26053
G20_5chr_p33_20180907	p33	6	19	647112	0.169562	TRUE	6	54.0031	15686
G21_5chr_p33_20180907	p33	6	20	586630	0.17979	TRUE	5	65.433	18819
G22_5chr_p33_20180907	p33	6	21	782938	0.137587	TRUE	5	45.6844	14516
G23_5chr_p33_20180907	p33	6	22	278099	0.171594	TRUE	2	79.5468	6688
G24_5chr_p33_20180907	p33	6	23	442743	0.131461	TRUE	3	54.3072	8000
H01_5chr_p33_20180907	p33	7	0	135765	0.179928	TRUE	1	136.134	3160
H02_5chr_p33_20180907	p33	7	1	294168	0.163154	TRUE	3	61.4442	7570
H03_5chr_p33_20180907	p33	7	2	795710	0.159643	TRUE	5	122.028	18936
H04_5chr_p33_20180907	p33	7	3	265571	0.189904	TRUE	4	50.1415	7086
H05_5chr_p33_20180907	p33	7	4	672796	0.175684	TRUE	5	98.1991	18868
H06_5chr_p33_20180907	p33	7	5	571308	0.190595	TRUE	5	59.6789	16895
H07_5chr_p33_20180907	p33	7	6	900817	0.146743	TRUE	5	73.4064	20438
H08_5chr_p33_20180907	p33	7	7	523725	0.179319	TRUE	4	76.3734	13736
H09_5chr_p33_20180907	p33	7	8	1379098	0.144962	TRUE	5	65.1341	30606
H10_5chr_p33_20180907	p33	7	9	895700	0.176885	TRUE	6	71.1134	23644
H11_5chr_p33_20180907	p33	7	10	823210	0.156176	TRUE	4	71.027	21923
H12_5chr_p33_20180907	p33	7	11	365946	0.208139	TRUE	4	70.8645	13428
H13_5chr_p33_20180907	p33	7	12	636840	0.166293	TRUE	5	67.1971	17697
H14_5chr_p33_20180907	p33	7	13	1017264	0.14969	TRUE	6	59.2371	21734
H15_5chr_p33_20180907	p33	7	14	572329	0.175667	TRUE	5	66.7685	16133
H16_5chr_p33_20180907	p33	7	15	1253497	0.160197	TRUE	6	98.9936	30113
H17_5chr_p33_20180907	p33	7	16	789201	0.171752	TRUE	4	29.1022	13460
H18_5chr_p33_20180907	p33	7	17	1467824	0.146686	TRUE	4	33.3005	22020
H19_5chr_p33_20180907	p33	7	18	1065427	0.162111	TRUE	5	97.38	26126
H20_5chr_p33_20180907	p33	7	19	543177	0.191031	TRUE	4	88.8881	16964
H21_5chr_p33_20180907	p33	7	20	649124	0.178875	TRUE	4	106.677	18421
H22_5chr_p33_20180907	p33	7	21	1452830	0.110189	TRUE	4	87.9682	18562
H23_5chr_p33_20180907	p33	7	22	668341	0.171797	TRUE	4	136.161	18747
H24_5chr_p33_20180907	p33	7	23	209055	0.149041	TRUE	1	64.8121	3201
I01_5chr_p33_20180907	p33	8	0	439392	0.219781	TRUE	2	27.1233	4276
I02_5chr_p33_20180907	p33	8	1	734022	0.178692	TRUE	3	19.2022	8139
I03_5chr_p33_20180907	p33	8	2	610715	0.173143	TRUE	5	46.8807	10946
I04_5chr_p33_20180907	p33	8	3	390240	0.194259	TRUE	3	69.5834	9681
I05_5chr_p33_20180907	p33	8	4	803119	0.18691	TRUE	6	77.9384	25467
I06_5chr_p33_20180907	p33	8	5	788967	0.192701	TRUE	6	77.217	25864
I07_5chr_p33_20180907	p33	8	6	926286	0.175126	TRUE	5	138.275	23046
I08_5chr_p33_20180907	p33	8	7	892852	0.175406	TRUE	5	95.2709	24512
I09_5chr_p33_20180907	p33	8	8	625670	0.181497	TRUE	4	118.643	16097
I10_5chr_p33_20180907	p33	8	9	570197	0.18373	TRUE	5	78.1247	15478
I11_5chr_p33_20180907	p33	8	10	1181130	0.170061	TRUE	5	78.7994	29266
I12_5chr_p33_20180907	p33	8	11	551343	0.182256	TRUE	3	74.3377	8709
I13_5chr_p33_20180907	p33	8	12	869298	0.173221	TRUE	5	86.4039	21531
I14_5chr_p33_20180907	p33	8	13	993965	0.159108	TRUE	3	115.038	24635
I15_5chr_p33_20180907	p33	8	14	695862	0.180435	TRUE	5	155.683	22308
I16_5chr_p33_20180907	p33	8	15	851262	0.182222	TRUE	4	91.1617	21326
I17_5chr_p33_20180907	p33	8	16	951064	0.154392	TRUE	5	91.6725	20536
I18_5chr_p33_20180907	p33	8	17	546131	0.166354	TRUE	3	87.039	10867
I19_5chr_p33_20180907	p33	8	18	1002370	0.176776	TRUE	3	175.452	29729
I20_5chr_p33_20180907	p33	8	19	584781	0.188302	TRUE	5	71.87	16329
I21_5chr_p33_20180907	p33	8	20	379296	0.208275	TRUE	5	58.4189	12350
I22_5chr_p33_20180907	p33	8	21	725743	0.156601	TRUE	3	116.399	17074
I23_5chr_p33_20180907	p33	8	22	295638	0.180353	TRUE	4	60.5309	8066
I24_5chr_p33_20180907	p33	8	23	248726	0.151523	TRUE	1	143.736	5855
J01_5chr_p33_20180907	p33	9	0	547003	0.21029	TRUE	2	23.6885	4017
J02_5chr_p33_20180907	p33	9	1	850530	0.196068	TRUE	1	21.8541	7559
J03_5chr_p33_20180907	p33	9	2	566184	0.175704	TRUE	2	51.9377	8299
J04_5chr_p33_20180907	p33	9	3	1020219	0.154232	TRUE	4	52.6684	18243
J05_5chr_p33_20180907	p33	9	4	437268	0.186985	TRUE	4	29.5109	9736
J06_5chr_p33_20180907	p33	9	5	453734	0.193935	TRUE	3	58.9895	12027
J07_5chr_p33_20180907	p33	9	6	1087917	0.155609	TRUE	5	55.547	22729
J08_5chr_p33_20180907	p33	9	7	1135175	0.16717	TRUE	5	57.6388	21912
J09_5chr_p33_20180907	p33	9	8	925044	0.158734	TRUE	6	44.8572	20376
J10_5chr_p33_20180907	p33	9	9	518683	0.190871	TRUE	3	74.7737	15302
J11_5chr_p33_20180907	p33	9	10	1233062	0.156489	TRUE	4	70.9285	26905
J12_5chr_p33_20180907	p33	9	11	861852	0.158598	TRUE	5	42.3974	14739
J13_5chr_p33_20180907	p33	9	12	1209048	0.166469	TRUE	6	43.5777	27015
J14_5chr_p33_20180907	p33	9	13	1812796	0.132625	TRUE	4	85.668	35704
J15_5chr_p33_20180907	p33	9	14	1004226	0.15861	TRUE	3	112.543	22004
J16_5chr_p33_20180907	p33	9	15	592225	0.170336	TRUE	5	37.6183	12426
J17_5chr_p33_20180907	p33	9	16	1279663	0.150031	TRUE	5	63.9227	26886
J18_5chr_p33_20180907	p33	9	17	1404278	0.140801	TRUE	4	57.5732	25202
J19_5chr_p33_20180907	p33	9	18	456861	0.191746	TRUE	5	35.2937	8830
J20_5chr_p33_20180907	p33	9	19	1090686	0.15916	TRUE	5	62.0812	26756
J21_5chr_p33_20180907	p33	9	20	525176	0.182382	TRUE	5	33.9504	13083
J22_5chr_p33_20180907	p33	9	21	1279954	0.1525	TRUE	5	49.4568	25952
J23_5chr_p33_20180907	p33	9	22	902840	0.167522	TRUE	5	59.0497	22687
J24_5chr_p33_20180907	p33	9	23	345921	0.180268	TRUE	3	26.5178	6463
K01_5chr_p33_20180907	p33	10	0	365193	0.15296	TRUE	2	48.046	7777
K02_5chr_p33_20180907	p33	10	1	170747	0.192961	TRUE	1	50.5006	4485
K03_5chr_p33_20180907	p33	10	2	625997	0.148642	TRUE	3	51.5966	9439
K04_5chr_p33_20180907	p33	10	3	475743	0.185761	TRUE	5	56.8008	15332
K05_5chr_p33_20180907	p33	10	4	405311	0.185951	TRUE	3	67.3897	10197
K06_5chr_p33_20180907	p33	10	5	560521	0.188153	TRUE	5	71.2775	17129
K07_5chr_p33_20180907	p33	10	6	1619547	0.149968	TRUE	5	12.1179	24499
K08_5chr_p33_20180907	p33	10	7	1117438	0.166238	FALSE	3	9.50136
K09_5chr_p33_20180907	p33	10	8	1128406	0.151313	TRUE	5	58.6249	19547
K10_5chr_p33_20180907	p33	10	9	472791	0.203425	TRUE	3	74.3113	10981
K11_5chr_p33_20180907	p33	10	10	1013588	0.168953	TRUE	4	64.6893	28246
K12_5chr_p33_20180907	p33	10	11	963181	0.176516	TRUE	5	64.3005	25629
K13_5chr_p33_20180907	p33	10	12	3181741	0.131013	FALSE	3	3.89749
K14_5chr_p33_20180907	p33	10	13	4900639	0.115295	FALSE	5	2.5807
K15_5chr_p33_20180907	p33	10	14	607905	0.174936	TRUE	5	58.5474	15604
K16_5chr_p33_20180907	p33	10	15	984955	0.148372	TRUE	5	76.037	25184
K17_5chr_p33_20180907	p33	10	16	663825	0.170979	TRUE	5	49.9475	17665
K18_5chr_p33_20180907	p33	10	17	427390	0.160566	TRUE	4	32.971	7054
K19_5chr_p33_20180907	p33	10	18	874497	0.173923	TRUE	6	37.0874	21624
K20_5chr_p33_20180907	p33	10	19	523909	0.175516	TRUE	3	22.9695	9606
K21_5chr_p33_20180907	p33	10	20	545893	0.184546	TRUE	4	55.1889	16120
K22_5chr_p33_20180907	p33	10	21	1147271	0.130221	TRUE	5	42.719	20028
K23_5chr_p33_20180907	p33	10	22	316963	0.198519	TRUE	3	61.1368	8849
K24_5chr_p33_20180907	p33	10	23	268509	0.157752	TRUE	2	42.8119	6037
L01_5chr_p33_20180907	p33	11	0	115648	0.217417	TRUE	1	31.6345	1878
L02_5chr_p33_20180907	p33	11	1	93518	0.240408	FALSE	1	6.66295
L03_5chr_p33_20180907	p33	11	2	511385	0.150756	TRUE	3	67.8145	11484
L04_5chr_p33_20180907	p33	11	3	414101	0.175885	TRUE	3	48.437	8166
L05_5chr_p33_20180907	p33	11	4	629428	0.156056	TRUE	4	71.4516	14920
L06_5chr_p33_20180907	p33	11	5	819387	0.168402	TRUE	5	53.5277	18151
L07_5chr_p33_20180907	p33	11	6	1986403	0.134656	TRUE	4	17.1418	24506
L08_5chr_p33_20180907	p33	11	7	1551429	0.152014	TRUE	4	14.9422	22274
L09_5chr_p33_20180907	p33	11	8	695271	0.14485	TRUE	5	29.8576	13061
L10_5chr_p33_20180907	p33	11	9	517878	0.169024	TRUE	4	46.6962	12629
L11_5chr_p33_20180907	p33	11	10	799472	0.157424	TRUE	3	45.7572	20602
L12_5chr_p33_20180907	p33	11	11	1037939	0.152773	TRUE	5	58.7669	26737
L13_5chr_p33_20180907	p33	11	12	5302452	0.109004	FALSE	5	3.11246
L14_5chr_p33_20180907	p33	11	13	6162300	0.108445	FALSE	4	2.67216
L15_5chr_p33_20180907	p33	11	14	910831	0.155723	TRUE	5	79.061	22730
L16_5chr_p33_20180907	p33	11	15	710150	0.156354	TRUE	4	58.9601	17547
L17_5chr_p33_20180907	p33	11	16	837410	0.129196	TRUE	4	38.3189	16259
L18_5chr_p33_20180907	p33	11	17	1155372	0.137565	TRUE	6	41.5243	21536
L19_5chr_p33_20180907	p33	11	18	759200	0.149251	TRUE	3	27.592	8674
L20_5chr_p33_20180907	p33	11	19	785415	0.150062	TRUE	4	25.1998	15487
L21_5chr_p33_20180907	p33	11	20	918338	0.146737	TRUE	3	112.461	20134
L22_5chr_p33_20180907	p33	11	21	1087843	0.121193	TRUE	3	62.1984	16429
L23_5chr_p33_20180907	p33	11	22	973402	0.151139	TRUE	4	70.9836	20373
L24_5chr_p33_20180907	p33	11	23	160267	0.188871	TRUE	1	71.2372	3174
M01_5chr_p33_20180907	p33	12	0	107554	0.218725	TRUE	2	71.8269	3906
M02_5chr_p33_20180907	p33	12	1	175549	0.197365	TRUE	3	57.2366	5568
M03_5chr_p33_20180907	p33	12	2	124178	0.202796	TRUE	1	96.9224	3840
M04_5chr_p33_20180907	p33	12	3	132245	0.221582	TRUE	1	118.04	4760
M05_5chr_p33_20180907	p33	12	4	293654	0.180155	TRUE	3	48.9141	6462
M06_5chr_p33_20180907	p33	12	5	440928	0.189923	TRUE	4	60.914	10319
M07_5chr_p33_20180907	p33	12	6	764702	0.164945	TRUE	5	125.684	21405
M08_5chr_p33_20180907	p33	12	7	551580	0.188775	TRUE	7	63.9285	16085
M09_5chr_p33_20180907	p33	12	8	618870	0.168496	TRUE	5	56.8947	18269
M10_5chr_p33_20180907	p33	12	9	448908	0.182842	TRUE	5	56.6353	12562
M11_5chr_p33_20180907	p33	12	10	2020879	0.181389	TRUE	4	27.2776	29657
M12_5chr_p33_20180907	p33	12	11	1547804	0.193943	TRUE	3	11.3251	14528
M13_5chr_p33_20180907	p33	12	12	530813	0.171441	TRUE	5	58.2284	16007
M14_5chr_p33_20180907	p33	12	13	718847	0.143218	TRUE	4	68.7663	13714
M15_5chr_p33_20180907	p33	12	14	513944	0.194909	TRUE	6	96.578	16265
M16_5chr_p33_20180907	p33	12	15	830902	0.153097	TRUE	5	84.4746	17446
M17_5chr_p33_20180907	p33	12	16	419402	0.164492	TRUE	4	77.9464	9453
M18_5chr_p33_20180907	p33	12	17	616224	0.159597	TRUE	4	96.2397	12521
M19_5chr_p33_20180907	p33	12	18	406322	0.196613	TRUE	4	42.4458	12746
M20_5chr_p33_20180907	p33	12	19	709121	0.189059	TRUE	6	88.137	21404
M21_5chr_p33_20180907	p33	12	20	582659	0.181291	TRUE	4	95.4274	18085
M22_5chr_p33_20180907	p33	12	21	493119	0.16385	TRUE	5	56.3769	13092
M23_5chr_p33_20180907	p33	12	22	340861	0.169964	TRUE	3	124.017	8582
M24_5chr_p33_20180907	p33	12	23	172426	0.160685	TRUE	2	47.6115	3362
N01_5chr_p33_20180907	p33	13	0	160319	0.154232	TRUE	1	50.6459	2794
N02_5chr_p33_20180907	p33	13	1	526934	0.139972	TRUE	3	81.3748	11425
N03_5chr_p33_20180907	p33	13	2	334540	0.157004	TRUE	3	77.5437	7512
N04_5chr_p33_20180907	p33	13	3	535503	0.162716	TRUE	3	96.894	14035
N05_5chr_p33_20180907	p33	13	4	528708	0.173909	TRUE	6	79.5786	15869
N06_5chr_p33_20180907	p33	13	5	607468	0.166715	TRUE	4	77.8292	15938
N07_5chr_p33_20180907	p33	13	6	374201	0.179601	TRUE	4	72.5934	7789
N08_5chr_p33_20180907	p33	13	7	821688	0.170088	TRUE	5	80.9349	20757
N09_5chr_p33_20180907	p33	13	8	547594	0.179292	TRUE	6	43.6016	13553
N10_5chr_p33_20180907	p33	13	9	477364	0.182379	TRUE	4	80.0696	12312
N11_5chr_p33_20180907	p33	13	10	1568705	0.18999	FALSE	5	9.96201
N12_5chr_p33_20180907	p33	13	11	1813697	0.183672	FALSE	5	9.14092
N13_5chr_p33_20180907	p33	13	12	327122	0.201136	TRUE	3	54.8931	6689
N14_5chr_p33_20180907	p33	13	13	608926	0.151598	TRUE	3	63.1884	11845
N15_5chr_p33_20180907	p33	13	14	521307	0.16743	TRUE	3	140.934	14991
N16_5chr_p33_20180907	p33	13	15	739140	0.173192	TRUE	5	110.694	19955
N17_5chr_p33_20180907	p33	13	16	852262	0.149284	TRUE	5	83.3945	18730
N18_5chr_p33_20180907	p33	13	17	465037	0.141502	TRUE	4	61.0698	8031
N19_5chr_p33_20180907	p33	13	18	652238	0.171638	TRUE	6	84.3295	16708
N20_5chr_p33_20180907	p33	13	19	626440	0.159266	TRUE	5	93.8473	15345
N21_5chr_p33_20180907	p33	13	20	552708	0.181147	TRUE	3	100.92	15032
N22_5chr_p33_20180907	p33	13	21	504051	0.141383	TRUE	3	58.2732	5744
N23_5chr_p33_20180907	p33	13	22	326575	0.177252	TRUE	3	81.6076	8180
N24_5chr_p33_20180907	p33	13	23	277903	0.14062	TRUE	4	63.3638	4872
O01_5chr_p33_20180907	p33	14	0	64440	0.268943	FALSE	10	2.20866
O02_5chr_p33_20180907	p33	14	1	129939	0.220724	TRUE	1	66.1121	1983
O03_5chr_p33_20180907	p33	14	2	146227	0.197971	TRUE	2	84.6129	3704
O04_5chr_p33_20180907	p33	14	3	564017	0.164248	TRUE	4	124.314	13950
O05_5chr_p33_20180907	p33	14	4	153340	0.18592	TRUE	2	68.2329	3699
O06_5chr_p33_20180907	p33	14	5	437734	0.172812	TRUE	3	113.701	12452
O07_5chr_p33_20180907	p33	14	6	609082	0.160297	TRUE	5	60.9297	13607
O08_5chr_p33_20180907	p33	14	7	948740	0.152087	TRUE	4	103.948	21706
O09_5chr_p33_20180907	p33	14	8	602659	0.144836	TRUE	5	65.3932	14087
O10_5chr_p33_20180907	p33	14	9	844539	0.161262	TRUE	5	83.8573	21936
O11_5chr_p33_20180907	p33	14	10	740293	0.167028	TRUE	6	82.3885	20325
O12_5chr_p33_20180907	p33	14	11	1022149	0.141448	TRUE	5	106.638	20479
O13_5chr_p33_20180907	p33	14	12	910735	0.13425	TRUE	5	51.7315	14998
O14_5chr_p33_20180907	p33	14	13	282034	0.176286	TRUE	3	48.7394	6313
O15_5chr_p33_20180907	p33	14	14	531517	0.170853	TRUE	5	79.4265	13566
O16_5chr_p33_20180907	p33	14	15	395626	0.178968	TRUE	3	113.353	11113
O17_5chr_p33_20180907	p33	14	16	536541	0.147724	TRUE	2	73.1776	11444
O18_5chr_p33_20180907	p33	14	17	370006	0.130443	TRUE	2	40.9825	5785
O19_5chr_p33_20180907	p33	14	18	333805	0.185025	TRUE	3	47.8025	8358
O20_5chr_p33_20180907	p33	14	19	304183	0.169171	TRUE	4	59.4008	5516
O21_5chr_p33_20180907	p33	14	20	267404	0.174235	TRUE	3	59.8397	5555
O22_5chr_p33_20180907	p33	14	21	1175473	0.126822	TRUE	4	120.558	19135
O23_5chr_p33_20180907	p33	14	22	333216	0.174636	TRUE	4	73.7766	9619
O24_5chr_p33_20180907	p33	14	23	256053	0.129632	TRUE	2	44.006	3527
P01_5chr_p33_20180907	p33	15	0	337370	0.164168	TRUE	4	24.611	4722
P02_5chr_p33_20180907	p33	15	1	288103	0.191707	TRUE	2	23.6165	6176
P03_5chr_p33_20180907	p33	15	2	601996	0.159922	TRUE	4	109.06	9350
P04_5chr_p33_20180907	p33	15	3	332371	0.156774	TRUE	2	94.4203	7041
P05_5chr_p33_20180907	p33	15	4	596782	0.13355	TRUE	3	87.6147	10599
P06_5chr_p33_20180907	p33	15	5	786052	0.131118	TRUE	4	99.6351	14071
P07_5chr_p33_20180907	p33	15	6	113709	0.223153	TRUE	2	13.9888	2045
P08_5chr_p33_20180907	p33	15	7	137940	0.209293	TRUE	2	52.9782	3059
P09_5chr_p33_20180907	p33	15	8	418240	0.15363	TRUE	5	51.169	8300
P10_5chr_p33_20180907	p33	15	9	300513	0.163866	TRUE	4	56.3585	5401
P11_5chr_p33_20180907	p33	15	10	765695	0.149154	TRUE	4	64.6392	16233
P12_5chr_p33_20180907	p33	15	11	461605	0.1614	TRUE	4	67.5149	11983
P13_5chr_p33_20180907	p33	15	12	624334	0.152913	TRUE	4	72.4188	13049
P14_5chr_p33_20180907	p33	15	13	679462	0.136062	TRUE	4	49.0398	12267
P15_5chr_p33_20180907	p33	15	14	658186	0.151765	TRUE	5	65.8679	14953
P16_5chr_p33_20180907	p33	15	15	470489	0.144816	TRUE	4	83.0581	9288
P17_5chr_p33_20180907	p33	15	16	822149	0.147098	TRUE	4	82.1984	20021
P18_5chr_p33_20180907	p33	15	17	675761	0.115749	TRUE	3	71.9634	9097
P19_5chr_p33_20180907	p33	15	18	401403	0.158911	TRUE	2	58.1344	6797
P20_5chr_p33_20180907	p33	15	19	442834	0.136213	TRUE	3	52.9374	7079
P21_5chr_p33_20180907	p33	15	20	1091142	0.122861	TRUE	2	135.069	14860
P22_5chr_p33_20180907	p33	15	21	1321510	0.108153	TRUE	3	64.0391	16171
P23_5chr_p33_20180907	p33	15	22	530154	0.119844	TRUE	2	72.1867	8048
P24_5chr_p33_20180907	p33	15	23	196775	0.140627	TRUE	2	40.4028	2706
A01_5chr_p34_20180907	p34	0	0	62853	0.19207	FALSE	3	9.48016
A02_5chr_p34_20180907	p34	0	1	658681	0.148539	TRUE	6	58.7554	12892
A03_5chr_p34_20180907	p34	0	2	347471	0.173211	TRUE	4	46.6771	8728
A04_5chr_p34_20180907	p34	0	3	410784	0.143167	TRUE	4	47.0461	8389
A05_5chr_p34_20180907	p34	0	4	1098890	0.138608	TRUE	6	69.7906	24536
A06_5chr_p34_20180907	p34	0	5	856291	0.126424	TRUE	4	69.7904	16571
A07_5chr_p34_20180907	p34	0	6	517492	0.139874	TRUE	5	29.625	9069
A08_5chr_p34_20180907	p34	0	7	604148	0.133756	TRUE	4	84.6764	13485
A09_5chr_p34_20180907	p34	0	8	1061690	0.122502	TRUE	5	70.2523	19594
A10_5chr_p34_20180907	p34	0	9	898123	0.146133	TRUE	5	97.7416	19529
A11_5chr_p34_20180907	p34	0	10	686293	0.132873	TRUE	4	85.155	13026
A12_5chr_p34_20180907	p34	0	11	546073	0.130025	TRUE	3	79.679	11689
A13_5chr_p34_20180907	p34	0	12	704454	0.134451	TRUE	4	45.6991	12324
A14_5chr_p34_20180907	p34	0	13	408811	0.141978	TRUE	4	22.9884	7413
A15_5chr_p34_20180907	p34	0	14	790273	0.135403	TRUE	5	60.626	12621
A16_5chr_p34_20180907	p34	0	15	375521	0.154193	TRUE	4	39.4997	7687
A17_5chr_p34_20180907	p34	0	16	361988	0.133346	TRUE	3	49.2623	7299
A18_5chr_p34_20180907	p34	0	17	334714	0.13809	TRUE	2	70.4346	6133
A19_5chr_p34_20180907	p34	0	18	405305	0.167285	TRUE	4	52.268	7829
A20_5chr_p34_20180907	p34	0	19	180369	0.151798	TRUE	1	59.343	3383
A21_5chr_p34_20180907	p34	0	20	583459	0.128427	TRUE	3	57.954	10706
A22_5chr_p34_20180907	p34	0	21	510358	0.10049	TRUE	2	48.2907	7273
A23_5chr_p34_20180907	p34	0	22	200534	0.194012	FALSE	2	4.05627
A24_5chr_p34_20180907	p34	0	23	338258	0.133454	TRUE	2	15.7577	3114
B01_5chr_p34_20180907	p34	1	0	57830	0.213431	FALSE	6	4.53729
B02_5chr_p34_20180907	p34	1	1	1086972	0.121972	TRUE	4	74.432	19016
B03_5chr_p34_20180907	p34	1	2	1222772	0.126497	TRUE	5	72.4925	22651
B04_5chr_p34_20180907	p34	1	3	644835	0.147504	TRUE	5	67.8675	12114
B05_5chr_p34_20180907	p34	1	4	1171426	0.13514	TRUE	5	63.7937	22778
B06_5chr_p34_20180907	p34	1	5	681528	0.134861	TRUE	4	58.6112	13528
B07_5chr_p34_20180907	p34	1	6	1024099	0.132147	TRUE	4	90.1785	22229
B08_5chr_p34_20180907	p34	1	7	1118623	0.138407	TRUE	4	76.1922	25444
B09_5chr_p34_20180907	p34	1	8	1099890	0.128536	TRUE	5	73.8528	23034
B10_5chr_p34_20180907	p34	1	9	568114	0.177315	TRUE	4	52.886	14826
B11_5chr_p34_20180907	p34	1	10	1673415	0.139999	TRUE	5	143.9	29911
B12_5chr_p34_20180907	p34	1	11	1548110	0.117703	TRUE	4	114.906	24153
B13_5chr_p34_20180907	p34	1	12	1026346	0.128492	TRUE	4	56.0413	14466
B14_5chr_p34_20180907	p34	1	13	626545	0.15481	TRUE	5	28.1627	11779
B15_5chr_p34_20180907	p34	1	14	509593	0.139574	TRUE	3	63.0359	7725
B16_5chr_p34_20180907	p34	1	15	655953	0.134915	TRUE	4	55.4092	11948
B17_5chr_p34_20180907	p34	1	16	586354	0.133983	TRUE	4	57.9535	12228
B18_5chr_p34_20180907	p34	1	17	645480	0.137199	TRUE	3	68.5511	15155
B19_5chr_p34_20180907	p34	1	18	464407	0.163337	TRUE	4	37.6534	11360
B20_5chr_p34_20180907	p34	1	19	176508	0.167003	TRUE	1	54.2147	4166
B21_5chr_p34_20180907	p34	1	20	623659	0.15215	TRUE	5	70.1063	12946
B22_5chr_p34_20180907	p34	1	21	331418	0.124499	TRUE	2	62.8001	5440
B23_5chr_p34_20180907	p34	1	22	340808	0.175263	TRUE	2	21.2896	3810
B24_5chr_p34_20180907	p34	1	23	496058	0.117322	TRUE	3	16.693	4835
C01_5chr_p34_20180907	p34	2	0	358903	0.220209	TRUE	4	10.9612	3954
C02_5chr_p34_20180907	p34	2	1	729857	0.169377	TRUE	4	43.7149	12893
C03_5chr_p34_20180907	p34	2	2	1164750	0.15965	TRUE	2	174.01	16701
C04_5chr_p34_20180907	p34	2	3	734938	0.183306	TRUE	5	42.7957	15332
C05_5chr_p34_20180907	p34	2	4	808159	0.171747	TRUE	5	36.9011	14733
C06_5chr_p34_20180907	p34	2	5	1418435	0.155515	TRUE	3	131.322	26412
C07_5chr_p34_20180907	p34	2	6	1458543	0.154514	TRUE	5	25.7612	22540
C08_5chr_p34_20180907	p34	2	7	1442097	0.145718	TRUE	5	25.7448	19859
C09_5chr_p34_20180907	p34	2	8	1213438	0.147132	TRUE	4	67.8116	20380
C10_5chr_p34_20180907	p34	2	9	1010026	0.167113	TRUE	4	47.8603	20521
C11_5chr_p34_20180907	p34	2	10	808298	0.166739	TRUE	3	39.8387	14089
C12_5chr_p34_20180907	p34	2	11	1350230	0.146808	TRUE	5	58.4444	23237
C13_5chr_p34_20180907	p34	2	12	791429	0.172796	TRUE	4	23.5736	11980
C14_5chr_p34_20180907	p34	2	13	1938359	0.131686	TRUE	4	53.9939	29261
C15_5chr_p34_20180907	p34	2	14	818679	0.182759	TRUE	4	53.9848	16549
C16_5chr_p34_20180907	p34	2	15	582165	0.188682	TRUE	2	81.7227	8010
C17_5chr_p34_20180907	p34	2	16	811869	0.166025	TRUE	4	42.9686	14434
C18_5chr_p34_20180907	p34	2	17	695126	0.175445	TRUE	2	42.1349	8615
C19_5chr_p34_20180907	p34	2	18	364004	0.226755	TRUE	2	37.602	4672
C20_5chr_p34_20180907	p34	2	19	814712	0.177252	TRUE	5	34.533	14846
C21_5chr_p34_20180907	p34	2	20	313987	0.258288	TRUE	3	14.5559	3217
C22_5chr_p34_20180907	p34	2	21	224188	0.296198	FALSE	8	2.04873
C23_5chr_p34_20180907	p34	2	22	489299	0.246276	TRUE	4	14.3749	4527
C24_5chr_p34_20180907	p34	2	23	289306	0.268486	FALSE	10	1.78391
D01_5chr_p34_20180907	p34	3	0	241416	0.247935	FALSE	3	8.81495
D02_5chr_p34_20180907	p34	3	1	609217	0.198408	TRUE	4	60.7557	12283
D03_5chr_p34_20180907	p34	3	2	1549180	0.146627	TRUE	5	62.4932	29660
D04_5chr_p34_20180907	p34	3	3	808634	0.167834	TRUE	4	40.4399	10504
D05_5chr_p34_20180907	p34	3	4	1022842	0.155796	TRUE	4	48.6133	13930
D06_5chr_p34_20180907	p34	3	5	1244205	0.161792	TRUE	5	58.0634	25658
D07_5chr_p34_20180907	p34	3	6	1748487	0.149629	TRUE	5	31.4856	25556
D08_5chr_p34_20180907	p34	3	7	1478813	0.159067	TRUE	4	33.6112	21872
D09_5chr_p34_20180907	p34	3	8	1220612	0.144567	TRUE	4	46.1805	20045
D10_5chr_p34_20180907	p34	3	9	998686	0.169354	TRUE	5	52.4316	21088
D11_5chr_p34_20180907	p34	3	10	561595	0.191979	TRUE	4	41.6649	11133
D12_5chr_p34_20180907	p34	3	11	863652	0.177456	TRUE	3	73.4375	17471
D13_5chr_p34_20180907	p34	3	12	1720601	0.155571	TRUE	4	35.1657	30512
D14_5chr_p34_20180907	p34	3	13	732426	0.178172	TRUE	3	72.1168	12336
D15_5chr_p34_20180907	p34	3	14	320905	0.254822	TRUE	1	107.049	4450
D16_5chr_p34_20180907	p34	3	15	1257027	0.149437	TRUE	4	96.23	20609
D17_5chr_p34_20180907	p34	3	16	1150831	0.160768	TRUE	5	39.1428	15735
D18_5chr_p34_20180907	p34	3	17	607394	0.177855	TRUE	3	52.0615	9256
D19_5chr_p34_20180907	p34	3	18	307375	0.262066	TRUE	1	110.748	4314
D20_5chr_p34_20180907	p34	3	19	729239	0.202448	TRUE	2	66.9471	18580
D21_5chr_p34_20180907	p34	3	20	381615	0.226778	TRUE	1	62.9952	6266
D22_5chr_p34_20180907	p34	3	21	659725	0.172708	TRUE	3	35.736	6892
D23_5chr_p34_20180907	p34	3	22	431979	0.236141	TRUE	2	43.1388	4880
D24_5chr_p34_20180907	p34	3	23	518148	0.224404	TRUE	2	30.711	5115
E01_5chr_p34_20180907	p34	4	0	417455	0.13342	TRUE	4	48.1787	8134
E02_5chr_p34_20180907	p34	4	1	728241	0.124748	TRUE	3	75.6542	13895
E03_5chr_p34_20180907	p34	4	2	1235245	0.136775	TRUE	5	11.7184	17972
E04_5chr_p34_20180907	p34	4	3	682075	0.137594	TRUE	3	91.1631	14384
E05_5chr_p34_20180907	p34	4	4	664976	0.153195	TRUE	4	53.5077	16641
E06_5chr_p34_20180907	p34	4	5	856703	0.151967	TRUE	5	43.2211	20414
E07_5chr_p34_20180907	p34	4	6	804743	0.137011	TRUE	5	50.18	16344
E08_5chr_p34_20180907	p34	4	7	815162	0.153202	TRUE	5	43.6792	17121
E09_5chr_p34_20180907	p34	4	8	1186320	0.130997	TRUE	4	92.0381	19309
E10_5chr_p34_20180907	p34	4	9	1319269	0.117437	TRUE	3	118.873	26460
E11_5chr_p34_20180907	p34	4	10	766930	0.15797	TRUE	4	61.5885	13771
E12_5chr_p34_20180907	p34	4	11	1495560	0.116534	TRUE	3	109.098	25202
E13_5chr_p34_20180907	p34	4	12	1204068	0.137554	TRUE	5	60.9045	26681
E14_5chr_p34_20180907	p34	4	13	828205	0.112891	TRUE	4	53.9083	12508
E15_5chr_p34_20180907	p34	4	14	450347	0.168783	TRUE	4	55.9194	7448
E16_5chr_p34_20180907	p34	4	15	773509	0.121475	TRUE	4	87.1624	14747
E17_5chr_p34_20180907	p34	4	16	438490	0.134592	TRUE	4	32.9132	7299
E18_5chr_p34_20180907	p34	4	17	641435	0.123675	TRUE	5	38.3008	14577
E19_5chr_p34_20180907	p34	4	18	556729	0.139326	TRUE	3	61.578	10437
E20_5chr_p34_20180907	p34	4	19	431963	0.152677	TRUE	4	63.5606	9914
E21_5chr_p34_20180907	p34	4	20	115528	0.194908	TRUE	1	43.0253	2866
E22_5chr_p34_20180907	p34	4	21	942563	0.104716	TRUE	4	104.286	14584
E23_5chr_p34_20180907	p34	4	22	210751	0.15317	TRUE	3	22.319	3700
E24_5chr_p34_20180907	p34	4	23	243516	0.133224	TRUE	2	23.9761	4730
F01_5chr_p34_20180907	p34	5	0	179861	0.154866	TRUE	1	74.8327	3140
F02_5chr_p34_20180907	p34	5	1	284337	0.150666	TRUE	3	28.7876	5330
F03_5chr_p34_20180907	p34	5	2	1045409	0.107861	TRUE	4	73.7212	15842
F04_5chr_p34_20180907	p34	5	3	1440866	0.114562	TRUE	5	72.5169	19365
F05_5chr_p34_20180907	p34	5	4	818692	0.152264	TRUE	4	60.362	19380
F06_5chr_p34_20180907	p34	5	5	732066	0.167839	TRUE	3	86.7558	17731
F07_5chr_p34_20180907	p34	5	6	927760	0.16409	TRUE	5	62.0506	24195
F08_5chr_p34_20180907	p34	5	7	1289360	0.143031	TRUE	5	68.1901	27781
F09_5chr_p34_20180907	p34	5	8	757287	0.156376	TRUE	4	74.3771	19343
F10_5chr_p34_20180907	p34	5	9	967489	0.173186	TRUE	5	83.9376	22331
F11_5chr_p34_20180907	p34	5	10	1500823	0.149354	TRUE	6	77.4988	33945
F12_5chr_p34_20180907	p34	5	11	1553789	0.140017	TRUE	5	82.5246	33705
F13_5chr_p34_20180907	p34	5	12	656849	0.154304	TRUE	4	54.3097	14772
F14_5chr_p34_20180907	p34	5	13	1444201	0.144271	TRUE	5	103.244	33265
F15_5chr_p34_20180907	p34	5	14	1210859	0.157485	TRUE	4	110.963	29749
F16_5chr_p34_20180907	p34	5	15	789843	0.142891	TRUE	4	47.8423	16465
F17_5chr_p34_20180907	p34	5	16	1074923	0.136822	TRUE	4	82.4662	21535
F18_5chr_p34_20180907	p34	5	17	1157548	0.128405	TRUE	4	83.0583	20104
F19_5chr_p34_20180907	p34	5	18	377359	0.16723	TRUE	2	92.8607	8551
F20_5chr_p34_20180907	p34	5	19	833292	0.166495	TRUE	4	76.9209	16624
F21_5chr_p34_20180907	p34	5	20	366821	0.166287	TRUE	2	112.211	8763
F22_5chr_p34_20180907	p34	5	21	76825	0.273384	TRUE	1	11.3366	974
F23_5chr_p34_20180907	p34	5	22	655775	0.137152	TRUE	4	37.9157	8970
F24_5chr_p34_20180907	p34	5	23	186001	0.143101	TRUE	1	29.3493	3086
G01_5chr_p34_20180907	p34	6	0	526952	0.156507	TRUE	3	42.552	10688
G02_5chr_p34_20180907	p34	6	1	979302	0.0974155	TRUE	4	41.8174	13794
G03_5chr_p34_20180907	p34	6	2	1088847	0.121152	TRUE	4	68.7329	14199
G04_5chr_p34_20180907	p34	6	3	1194812	0.133684	TRUE	5	82.4795	21595
G05_5chr_p34_20180907	p34	6	4	771337	0.158848	TRUE	5	48.4426	18573
G06_5chr_p34_20180907	p34	6	5	1268169	0.148769	TRUE	5	72.7218	27819
G07_5chr_p34_20180907	p34	6	6	958710	0.153955	TRUE	5	46.7349	24976
G08_5chr_p34_20180907	p34	6	7	2010191	0.129994	TRUE	4	91.5862	37841
G09_5chr_p34_20180907	p34	6	8	681693	0.143929	TRUE	5	36.5949	14234
G10_5chr_p34_20180907	p34	6	9	1572549	0.143437	TRUE	5	62.1131	27929
G11_5chr_p34_20180907	p34	6	10	813791	0.138815	TRUE	3	72.713	11071
G12_5chr_p34_20180907	p34	6	11	1392159	0.144157	TRUE	5	59.8097	29947
G13_5chr_p34_20180907	p34	6	12	1320463	0.135838	TRUE	6	32.5015	27742
G14_5chr_p34_20180907	p34	6	13	1056358	0.132331	TRUE	4	51.1119	18999
G15_5chr_p34_20180907	p34	6	14	589009	0.168913	TRUE	5	59.1129	12483
G16_5chr_p34_20180907	p34	6	15	1145453	0.128914	TRUE	4	66.1996	21072
G17_5chr_p34_20180907	p34	6	16	1061651	0.156773	TRUE	3	23.3116	11318
G18_5chr_p34_20180907	p34	6	17	1885200	0.124946	TRUE	4	48.7358	26045
G19_5chr_p34_20180907	p34	6	18	595082	0.208577	TRUE	2	19.7721	4151
G20_5chr_p34_20180907	p34	6	19	514249	0.152948	TRUE	4	43.7237	10936
G21_5chr_p34_20180907	p34	6	20	514021	0.158124	TRUE	2	62.7716	11151
G22_5chr_p34_20180907	p34	6	21	124883	0.184665	TRUE	1	22.9477	2414
G23_5chr_p34_20180907	p34	6	22	547954	0.12957	TRUE	3	75.0439	10287
G24_5chr_p34_20180907	p34	6	23	398203	0.122351	TRUE	2	40.5978	5575
H01_5chr_p34_20180907	p34	7	0	818964	0.132667	TRUE	3	95.5926	13294
H02_5chr_p34_20180907	p34	7	1	502584	0.146329	TRUE	4	54.8996	10319
H03_5chr_p34_20180907	p34	7	2	652503	0.130041	TRUE	4	65.0892	12936
H04_5chr_p34_20180907	p34	7	3	538903	0.154913	TRUE	2	87.4304	11685
H05_5chr_p34_20180907	p34	7	4	934333	0.150043	TRUE	5	59.659	21661
H06_5chr_p34_20180907	p34	7	5	1880823	0.155465	TRUE	7	81.5187	46456
H07_5chr_p34_20180907	p34	7	6	1593636	0.12196	TRUE	5	91.4116	26718
H08_5chr_p34_20180907	p34	7	7	1139251	0.136008	TRUE	5	60.7675	21820
H09_5chr_p34_20180907	p34	7	8	1376964	0.131363	TRUE	5	67.7549	29273
H10_5chr_p34_20180907	p34	7	9	554285	0.174694	TRUE	4	54.5298	16812
H11_5chr_p34_20180907	p34	7	10	1022949	0.147728	TRUE	5	70.0804	22201
H12_5chr_p34_20180907	p34	7	11	818987	0.154079	TRUE	3	63.0511	20107
H13_5chr_p34_20180907	p34	7	12	864197	0.152336	TRUE	5	59.3129	20046
H14_5chr_p34_20180907	p34	7	13	1512900	0.129363	TRUE	6	53.0443	31756
H15_5chr_p34_20180907	p34	7	14	608830	0.172229	TRUE	4	87.6788	16243
H16_5chr_p34_20180907	p34	7	15	1847961	0.120363	TRUE	4	143.333	31187
H17_5chr_p34_20180907	p34	7	16	1454989	0.14079	TRUE	3	44.6319	24609
H18_5chr_p34_20180907	p34	7	17	921711	0.15427	TRUE	3	21.2857	8264
H19_5chr_p34_20180907	p34	7	18	881491	0.145818	TRUE	4	65.7667	15729
H20_5chr_p34_20180907	p34	7	19	217407	0.18297	TRUE	2	66.2329	6837
H21_5chr_p34_20180907	p34	7	20	602661	0.165481	TRUE	3	75.6792	12530
H22_5chr_p34_20180907	p34	7	21	196399	0.152818	TRUE	1	67.7781	3733
H23_5chr_p34_20180907	p34	7	22	287705	0.171436	TRUE	4	24.7866	3221
H24_5chr_p34_20180907	p34	7	23	213847	0.123348	TRUE	1	41.811	2563
I01_5chr_p34_20180907	p34	8	0	437234	0.198996	FALSE	1	8.11663
I02_5chr_p34_20180907	p34	8	1	969505	0.162748	TRUE	3	40.0811	15814
I03_5chr_p34_20180907	p34	8	2	305870	0.177538	TRUE	2	24.8991	2130
I04_5chr_p34_20180907	p34	8	3	962837	0.156874	TRUE	5	68.4718	19698
I05_5chr_p34_20180907	p34	8	4	749380	0.186205	TRUE	5	44.8829	23922
I06_5chr_p34_20180907	p34	8	5	554865	0.1713	TRUE	4	79.1911	15552
I07_5chr_p34_20180907	p34	8	6	709378	0.158878	TRUE	6	72.3379	16846
I08_5chr_p34_20180907	p34	8	7	1290988	0.151499	TRUE	4	113.338	27618
I09_5chr_p34_20180907	p34	8	8	850345	0.14397	TRUE	5	69.4628	19414
I10_5chr_p34_20180907	p34	8	9	695378	0.177433	TRUE	5	59.0948	20512
I11_5chr_p34_20180907	p34	8	10	266441	0.196792	TRUE	3	33.9272	7081
I12_5chr_p34_20180907	p34	8	11	864077	0.149742	TRUE	4	73.486	14694
I13_5chr_p34_20180907	p34	8	12	948334	0.146732	TRUE	6	46.4665	21086
I14_5chr_p34_20180907	p34	8	13	1226371	0.133188	TRUE	5	84.6775	25319
I15_5chr_p34_20180907	p34	8	14	874602	0.164458	TRUE	6	70.7208	18730
I16_5chr_p34_20180907	p34	8	15	747201	0.142014	TRUE	5	98.1627	15504
I17_5chr_p34_20180907	p34	8	16	415598	0.17002	TRUE	3	47.411	9957
I18_5chr_p34_20180907	p34	8	17	776953	0.132007	TRUE	3	67.8452	14977
I19_5chr_p34_20180907	p34	8	18	296517	0.180736	TRUE	2	58.6889	6469
I20_5chr_p34_20180907	p34	8	19	626956	0.177242	TRUE	4	127.328	12289
I21_5chr_p34_20180907	p34	8	20	377527	0.187861	TRUE	6	31.1381	8877
I22_5chr_p34_20180907	p34	8	21	702854	0.128383	TRUE	3	77.8269	10782
I23_5chr_p34_20180907	p34	8	22	364650	0.162373	TRUE	3	80.066	7995
I24_5chr_p34_20180907	p34	8	23	290279	0.148059	TRUE	4	34.0112	5326
J01_5chr_p34_20180907	p34	9	0	1083312	0.158395	TRUE	4	18.5428	13733
J02_5chr_p34_20180907	p34	9	1	934810	0.18688	TRUE	4	26.4646	13886
J03_5chr_p34_20180907	p34	9	2	1003826	0.140951	TRUE	3	48.5825	13757
J04_5chr_p34_20180907	p34	9	3	1224064	0.158175	TRUE	4	74.0066	16841
J05_5chr_p34_20180907	p34	9	4	1277251	0.144467	TRUE	5	61.6608	26163
J06_5chr_p34_20180907	p34	9	5	1189734	0.15612	TRUE	6	45.9181	25073
J07_5chr_p34_20180907	p34	9	6	771879	0.177552	TRUE	6	31.857	18957
J08_5chr_p34_20180907	p34	9	7	824789	0.157933	TRUE	4	58.0974	19288
J09_5chr_p34_20180907	p34	9	8	1237587	0.145294	TRUE	5	46.3135	24661
J10_5chr_p34_20180907	p34	9	9	1484591	0.149572	TRUE	5	63.704	31614
J11_5chr_p34_20180907	p34	9	10	1607316	0.14989	TRUE	5	55.1852	26397
J12_5chr_p34_20180907	p34	9	11	2113155	0.147517	TRUE	5	55.876	41933
J13_5chr_p34_20180907	p34	9	12	1288279	0.147372	TRUE	6	47.3587	24529
J14_5chr_p34_20180907	p34	9	13	1464693	0.131489	TRUE	5	47.5813	23202
J15_5chr_p34_20180907	p34	9	14	1440021	0.150863	TRUE	7	74.1294	30439
J16_5chr_p34_20180907	p34	9	15	930065	0.130966	TRUE	3	71.5008	15454
J17_5chr_p34_20180907	p34	9	16	1092308	0.123287	TRUE	5	36.6079	14891
J18_5chr_p34_20180907	p34	9	17	263317	0.206749	TRUE	1	43.9054	3187
J19_5chr_p34_20180907	p34	9	18	777960	0.161019	TRUE	4	56.535	16945
J20_5chr_p34_20180907	p34	9	19	713300	0.164816	TRUE	4	44.3512	16175
J21_5chr_p34_20180907	p34	9	20	777251	0.153742	TRUE	5	47.2318	16221
J22_5chr_p34_20180907	p34	9	21	347658	0.245522	TRUE	2	36.2827	4254
J23_5chr_p34_20180907	p34	9	22	850014	0.134886	TRUE	4	75.2675	14340
J24_5chr_p34_20180907	p34	9	23	622488	0.137625	TRUE	3	33.3484	8369
K01_5chr_p34_20180907	p34	10	0	171884	0.202953	TRUE	2	38.7984	4652
K02_5chr_p34_20180907	p34	10	1	266127	0.159088	TRUE	1	45.3218	4669
K03_5chr_p34_20180907	p34	10	2	629474	0.135193	TRUE	2	71.0629	14446
K04_5chr_p34_20180907	p34	10	3	927761	0.152582	TRUE	4	63.7484	21041
K05_5chr_p34_20180907	p34	10	4	628371	0.147184	TRUE	3	59.5243	12098
K06_5chr_p34_20180907	p34	10	5	908092	0.144357	TRUE	6	47.2864	18287
K07_5chr_p34_20180907	p34	10	6	1328971	0.131657	TRUE	4	11.3409	18929
K08_5chr_p34_20180907	p34	10	7	1588809	0.138919	TRUE	4	13.3493	20706
K09_5chr_p34_20180907	p34	10	8	940309	0.133404	TRUE	5	33.0574	19776
K10_5chr_p34_20180907	p34	10	9	883202	0.146786	TRUE	3	65.5326	18751
K11_5chr_p34_20180907	p34	10	10	847643	0.145826	TRUE	4	47.1874	18353
K12_5chr_p34_20180907	p34	10	11	468939	0.145338	TRUE	2	72.4074	9531
K13_5chr_p34_20180907	p34	10	12	3564484	0.118259	FALSE	5	3.03459
K14_5chr_p34_20180907	p34	10	13	3527723	0.115936	FALSE	4	5.18737
K15_5chr_p34_20180907	p34	10	14	789019	0.152306	TRUE	5	52.0076	19485
K16_5chr_p34_20180907	p34	10	15	866752	0.143136	TRUE	3	69.8081	20511
K17_5chr_p34_20180907	p34	10	16	402174	0.155498	TRUE	2	40.6053	9466
K18_5chr_p34_20180907	p34	10	17	879750	0.12516	TRUE	3	65.7381	15885
K19_5chr_p34_20180907	p34	10	18	1071146	0.137773	TRUE	4	55.7169	21310
K20_5chr_p34_20180907	p34	10	19	775740	0.169296	TRUE	6	43.7087	20409
K21_5chr_p34_20180907	p34	10	20	493121	0.155481	TRUE	4	52.5163	12271
K22_5chr_p34_20180907	p34	10	21	560939	0.134446	TRUE	3	55.9438	6294
K23_5chr_p34_20180907	p34	10	22	471034	0.136117	TRUE	3	41.8841	7373
K24_5chr_p34_20180907	p34	10	23	154361	0.167002	TRUE	2	17.314	2590
L01_5chr_p34_20180907	p34	11	0	332904	0.15422	TRUE	2	46.3378	5991
L02_5chr_p34_20180907	p34	11	1	557780	0.152138	TRUE	3	37.2592	12290
L03_5chr_p34_20180907	p34	11	2	835758	0.124239	TRUE	3	54.4549	14731
L04_5chr_p34_20180907	p34	11	3	1192312	0.143261	TRUE	4	37.6302	24726
L05_5chr_p34_20180907	p34	11	4	1414343	0.131406	TRUE	5	51.6297	26062
L06_5chr_p34_20180907	p34	11	5	1378130	0.13136	TRUE	5	57.18	25374
L07_5chr_p34_20180907	p34	11	6	2502192	0.126854	TRUE	4	10.7972	28119
L08_5chr_p34_20180907	p34	11	7	1740565	0.134889	FALSE	4	8.64502
L09_5chr_p34_20180907	p34	11	8	1245493	0.133972	TRUE	4	43.2282	23349
L10_5chr_p34_20180907	p34	11	9	913318	0.144778	TRUE	4	47.7196	20301
L11_5chr_p34_20180907	p34	11	10	1315717	0.129672	TRUE	5	61.4744	23584
L12_5chr_p34_20180907	p34	11	11	722166	0.158773	TRUE	3	66.7795	18803
L13_5chr_p34_20180907	p34	11	12	4350688	0.103817	FALSE	4	3.8147
L14_5chr_p34_20180907	p34	11	13	4909341	0.106852	FALSE	5	3.98736
L15_5chr_p34_20180907	p34	11	14	1185610	0.126123	TRUE	5	67.7794	22980
L16_5chr_p34_20180907	p34	11	15	1015868	0.132181	TRUE	5	40.7309	18778
L17_5chr_p34_20180907	p34	11	16	941404	0.131302	TRUE	4	42.0272	18468
L18_5chr_p34_20180907	p34	11	17	796226	0.127113	TRUE	4	48.7331	11868
L19_5chr_p34_20180907	p34	11	18	597146	0.151906	TRUE	4	30.2375	9597
L20_5chr_p34_20180907	p34	11	19	479402	0.137531	TRUE	2	28.8202	7565
L21_5chr_p34_20180907	p34	11	20	888434	0.125156	TRUE	4	68.789	16812
L22_5chr_p34_20180907	p34	11	21	638955	0.149262	TRUE	4	52.956	13471
L23_5chr_p34_20180907	p34	11	22	414633	0.153372	TRUE	3	59.5991	7737
L24_5chr_p34_20180907	p34	11	23	475824	0.114813	TRUE	2	34.1858	6247
M01_5chr_p34_20180907	p34	12	0	421508	0.144417	TRUE	2	59.3046	7064
M02_5chr_p34_20180907	p34	12	1	292129	0.148129	TRUE	3	56.0331	6954
M03_5chr_p34_20180907	p34	12	2	403317	0.172774	TRUE	3	70.6378	11480
M04_5chr_p34_20180907	p34	12	3	576734	0.145968	TRUE	4	59.4925	13652
M05_5chr_p34_20180907	p34	12	4	628265	0.151163	TRUE	4	56.4843	13694
M06_5chr_p34_20180907	p34	12	5	706905	0.180411	TRUE	4	42.6033	14955
M07_5chr_p34_20180907	p34	12	6	361203	0.162349	TRUE	3	84.4334	10255
M08_5chr_p34_20180907	p34	12	7	990492	0.157742	TRUE	5	82.6107	24637
M09_5chr_p34_20180907	p34	12	8	792159	0.140924	TRUE	5	52.4107	15378
M10_5chr_p34_20180907	p34	12	9	770874	0.168844	TRUE	5	61.4934	19975
M11_5chr_p34_20180907	p34	12	10	1352099	0.186869	TRUE	4	12.2372	17789
M12_5chr_p34_20180907	p34	12	11	2115547	0.158296	TRUE	5	12.5946	26963
M13_5chr_p34_20180907	p34	12	12	370958	0.163021	TRUE	5	29.8264	8185
M14_5chr_p34_20180907	p34	12	13	1112856	0.132895	TRUE	4	71.0603	17943
M15_5chr_p34_20180907	p34	12	14	757690	0.154186	TRUE	5	87.7762	18580
M16_5chr_p34_20180907	p34	12	15	988054	0.144469	TRUE	5	65.0723	23251
M17_5chr_p34_20180907	p34	12	16	549450	0.174955	TRUE	5	37.0947	12959
M18_5chr_p34_20180907	p34	12	17	686843	0.131389	TRUE	4	66.9999	14435
M19_5chr_p34_20180907	p34	12	18	658509	0.153284	TRUE	3	71.2827	13363
M20_5chr_p34_20180907	p34	12	19	442440	0.135111	TRUE	3	56.1068	7755
M21_5chr_p34_20180907	p34	12	20	214218	0.172151	TRUE	2	69.7147	3952
M22_5chr_p34_20180907	p34	12	21	351766	0.203582	TRUE	2	42.5439	6438
M23_5chr_p34_20180907	p34	12	22	540264	0.153519	TRUE	5	70.7824	10050
M24_5chr_p34_20180907	p34	12	23	493319	0.119229	TRUE	3	57.953	7023
N01_5chr_p34_20180907	p34	13	0	630764	0.136574	TRUE	4	68.5223	14310
N02_5chr_p34_20180907	p34	13	1	483357	0.145493	TRUE	1	129.659	10022
N03_5chr_p34_20180907	p34	13	2	834112	0.124878	TRUE	5	79.4661	13114
N04_5chr_p34_20180907	p34	13	3	775574	0.151314	TRUE	4	113.34	18847
N05_5chr_p34_20180907	p34	13	4	822318	0.156591	TRUE	4	49.3281	17281
N06_5chr_p34_20180907	p34	13	5	747272	0.157592	TRUE	3	58.3723	15699
N07_5chr_p34_20180907	p34	13	6	422810	0.151494	TRUE	4	50.4415	9149
N08_5chr_p34_20180907	p34	13	7	687961	0.154767	TRUE	5	42.7641	16011
N09_5chr_p34_20180907	p34	13	8	1134283	0.126857	TRUE	5	43.8218	19861
N10_5chr_p34_20180907	p34	13	9	809200	0.16582	TRUE	4	49.2671	20823
N11_5chr_p34_20180907	p34	13	10	2382590	0.176651	TRUE	7	11.1407	27862
N12_5chr_p34_20180907	p34	13	11	1827483	0.176865	FALSE	3	7.84395
N13_5chr_p34_20180907	p34	13	12	1023867	0.141784	TRUE	5	48.8209	18991
N14_5chr_p34_20180907	p34	13	13	547088	0.141975	TRUE	5	31.81	10864
N15_5chr_p34_20180907	p34	13	14	361805	0.156739	TRUE	4	40.9878	8327
N16_5chr_p34_20180907	p34	13	15	897903	0.135379	TRUE	4	119.96	16813
N17_5chr_p34_20180907	p34	13	16	1130313	0.131199	TRUE	6	59.5082	21232
N18_5chr_p34_20180907	p34	13	17	883328	0.129161	TRUE	6	54.0138	18214
N19_5chr_p34_20180907	p34	13	18	665718	0.167912	TRUE	4	94.7018	18940
N20_5chr_p34_20180907	p34	13	19	917085	0.141987	TRUE	4	93.8048	18982
N21_5chr_p34_20180907	p34	13	20	620121	0.151149	TRUE	5	42.1179	13192
N22_5chr_p34_20180907	p34	13	21	1465856	0.102788	TRUE	4	123.995	21131
N23_5chr_p34_20180907	p34	13	22	456869	0.162401	TRUE	4	67.5764	8758
N24_5chr_p34_20180907	p34	13	23	357595	0.147175	TRUE	5	28.6582	8264
O01_5chr_p34_20180907	p34	14	0	787778	0.124826	TRUE	5	55.4259	13284
O02_5chr_p34_20180907	p34	14	1	614077	0.141815	TRUE	4	47.36	10787
O03_5chr_p34_20180907	p34	14	2	47995	0.332251	FALSE	1	2.58216
O04_5chr_p34_20180907	p34	14	3	469076	0.121006	TRUE	2	62.5516	6819
O05_5chr_p34_20180907	p34	14	4	440509	0.148816	TRUE	3	45.4158	9290
O06_5chr_p34_20180907	p34	14	5	398825	0.165612	TRUE	3	83.8551	11085
O07_5chr_p34_20180907	p34	14	6	621638	0.146199	TRUE	4	64.4005	16256
O08_5chr_p34_20180907	p34	14	7	785135	0.126394	TRUE	4	55.8286	13502
O09_5chr_p34_20180907	p34	14	8	842601	0.122666	TRUE	3	50.0356	14793
O10_5chr_p34_20180907	p34	14	9	677584	0.147469	TRUE	4	99.5485	14877
O11_5chr_p34_20180907	p34	14	10	867912	0.143881	TRUE	6	68.8423	20715
O12_5chr_p34_20180907	p34	14	11	939555	0.132177	TRUE	5	44.3429	18080
O13_5chr_p34_20180907	p34	14	12	1125907	0.131656	TRUE	4	42.8829	20541
O14_5chr_p34_20180907	p34	14	13	1419811	0.108086	TRUE	5	50.0424	21876
O15_5chr_p34_20180907	p34	14	14	715874	0.139907	TRUE	6	60.0465	14052
O16_5chr_p34_20180907	p34	14	15	830341	0.130041	TRUE	6	43.6671	15394
O17_5chr_p34_20180907	p34	14	16	621074	0.142828	TRUE	5	44.6857	13604
O18_5chr_p34_20180907	p34	14	17	1298077	0.11838	TRUE	6	69.7333	24046
O19_5chr_p34_20180907	p34	14	18	762162	0.178288	TRUE	3	54.3733	15114
O20_5chr_p34_20180907	p34	14	19	188460	0.175498	TRUE	3	27.6278	2865
O21_5chr_p34_20180907	p34	14	20	418768	0.15405	TRUE	3	63.7883	8639
O22_5chr_p34_20180907	p34	14	21	772501	0.115242	TRUE	4	83.8725	13604
O23_5chr_p34_20180907	p34	14	22	257927	0.152733	TRUE	2	85.4771	4790
O24_5chr_p34_20180907	p34	14	23	505224	0.11518	TRUE	2	34.803	8618
P01_5chr_p34_20180907	p34	15	0	852991	0.105551	TRUE	2	47.2719	8218
P02_5chr_p34_20180907	p34	15	1	435833	0.134444	TRUE	2	45.2851	5431
P03_5chr_p34_20180907	p34	15	2	369990	0.142508	TRUE	3	46.7487	5524
P04_5chr_p34_20180907	p34	15	3	666000	0.117335	TRUE	3	57.5561	7806
P05_5chr_p34_20180907	p34	15	4	729595	0.126973	TRUE	3	54.9548	9692
P06_5chr_p34_20180907	p34	15	5	746112	0.122216	TRUE	3	32.3094	9716
P07_5chr_p34_20180907	p34	15	6	408286	0.152925	TRUE	3	44.4395	9270
P08_5chr_p34_20180907	p34	15	7	888422	0.134295	TRUE	6	48.7861	19013
P09_5chr_p34_20180907	p34	15	8	1319284	0.132289	TRUE	5	34.0563	24531
P10_5chr_p34_20180907	p34	15	9	584769	0.157262	TRUE	4	39.7512	14427
P11_5chr_p34_20180907	p34	15	10	763783	0.145434	TRUE	4	51.7727	18597
P12_5chr_p34_20180907	p34	15	11	589842	0.147077	TRUE	3	30.7413	11640
P13_5chr_p34_20180907	p34	15	12	974255	0.149477	TRUE	5	36.8068	18442
P14_5chr_p34_20180907	p34	15	13	1046743	0.123556	TRUE	4	41.7985	13313
P15_5chr_p34_20180907	p34	15	14	812152	0.15319	TRUE	5	17.4275	12250
P16_5chr_p34_20180907	p34	15	15	1086945	0.133188	TRUE	5	64.2939	21067
P17_5chr_p34_20180907	p34	15	16	1131709	0.130141	TRUE	6	52.5416	19448
P18_5chr_p34_20180907	p34	15	17	1557212	0.100635	TRUE	4	67.977	22471
P19_5chr_p34_20180907	p34	15	18	970697	0.133154	TRUE	5	51.8831	16448
P20_5chr_p34_20180907	p34	15	19	784943	0.124945	TRUE	4	54.4358	13193
P21_5chr_p34_20180907	p34	15	20	708061	0.125976	TRUE	4	60.2961	10746
P22_5chr_p34_20180907	p34	15	21	704739	0.102643	TRUE	3	55.739	8247
P23_5chr_p34_20180907	p34	15	22	383053	0.120914	TRUE	3	51.7708	6514
P24_5chr_p34_20180907	p34	15	23	692065	0.0926197	TRUE	5	35.8662	8256
A01_5chr_p35_20180907	p35	0	0	986497	0.167467	TRUE	9	55.716	28645
A02_5chr_p35_20180907	p35	0	1	701485	0.173256	TRUE	9	27.0506	19645
A03_5chr_p35_20180907	p35	0	2	1591359	0.151244	TRUE	8	78.1123	37433
A04_5chr_p35_20180907	p35	0	3	1350442	0.153048	TRUE	10	57.1023	29084
A05_5chr_p35_20180907	p35	0	4	999336	0.162921	TRUE	8	54.2368	23872
A06_5chr_p35_20180907	p35	0	5	1131171	0.17335	TRUE	8	38.1625	34116
A07_5chr_p35_20180907	p35	0	6	1084333	0.165539	TRUE	9	39.0801	25501
A08_5chr_p35_20180907	p35	0	7	394892	0.180516	TRUE	5	34.5242	13147
A09_5chr_p35_20180907	p35	0	8	455291	0.163975	TRUE	3	47.7438	6738
A10_5chr_p35_20180907	p35	0	9	456896	0.207273	TRUE	4	19.2775	8868
A11_5chr_p35_20180907	p35	0	10	427039	0.162656	TRUE	3	66.6411	10887
A12_5chr_p35_20180907	p35	0	11	667820	0.171317	TRUE	5	59.0476	20716
A13_5chr_p35_20180907	p35	0	12	602917	0.158637	TRUE	5	13.6161	12178
A14_5chr_p35_20180907	p35	0	13	816578	0.147169	TRUE	3	37.4497	18593
A15_5chr_p35_20180907	p35	0	14	498390	0.175482	TRUE	4	20.4105	13401
A16_5chr_p35_20180907	p35	0	15	680922	0.170185	TRUE	6	48.206	16429
A17_5chr_p35_20180907	p35	0	16	406415	0.158161	TRUE	4	40.5167	8609
A18_5chr_p35_20180907	p35	0	17	671094	0.136303	TRUE	3	115.159	11960
A19_5chr_p35_20180907	p35	0	18	903723	0.166971	TRUE	5	25.5794	14622
A20_5chr_p35_20180907	p35	0	19	308347	0.159751	TRUE	4	26.3922	5442
A21_5chr_p35_20180907	p35	0	20	682171	0.130714	TRUE	6	44.1504	12831
A22_5chr_p35_20180907	p35	0	21	1370569	0.14291	TRUE	3	124.228	16703
A23_5chr_p35_20180907	p35	0	22	1712534	0.166766	TRUE	4	11.1408	9026
A24_5chr_p35_20180907	p35	0	23	1439976	0.154467	TRUE	4	14.5334	9857
B01_5chr_p35_20180907	p35	1	0	602748	0.16055	TRUE	4	78.8737	15262
B02_5chr_p35_20180907	p35	1	1	890797	0.124055	TRUE	5	70.8985	15759
B03_5chr_p35_20180907	p35	1	2	444254	0.147277	TRUE	4	104.18	8033
B04_5chr_p35_20180907	p35	1	3	494831	0.176776	TRUE	5	105.203	13134
B05_5chr_p35_20180907	p35	1	4	463175	0.189728	TRUE	4	66.6761	15183
B06_5chr_p35_20180907	p35	1	5	412999	0.175798	TRUE	5	59.0085	9778
B07_5chr_p35_20180907	p35	1	6	584665	0.17444	TRUE	5	73.7966	17801
B08_5chr_p35_20180907	p35	1	7	583831	0.180466	TRUE	5	58.361	17793
B09_5chr_p35_20180907	p35	1	8	603435	0.173664	TRUE	3	83.7489	15726
B10_5chr_p35_20180907	p35	1	9	640485	0.198978	TRUE	5	84.7512	17682
B11_5chr_p35_20180907	p35	1	10	379259	0.184768	TRUE	5	72.5741	11965
B12_5chr_p35_20180907	p35	1	11	555399	0.148535	TRUE	5	93.1149	13633
B13_5chr_p35_20180907	p35	1	12	529758	0.152057	TRUE	3	61.9106	10729
B14_5chr_p35_20180907	p35	1	13	628946	0.162584	TRUE	3	63.1525	14707
B15_5chr_p35_20180907	p35	1	14	676941	0.174828	TRUE	4	83.8588	17871
B16_5chr_p35_20180907	p35	1	15	403946	0.187101	TRUE	3	46.8879	9943
B17_5chr_p35_20180907	p35	1	16	706890	0.166333	TRUE	5	139.549	18019
B18_5chr_p35_20180907	p35	1	17	579497	0.163123	TRUE	5	91.7103	14529
B19_5chr_p35_20180907	p35	1	18	748187	0.167775	TRUE	3	163.729	19248
B20_5chr_p35_20180907	p35	1	19	342437	0.177946	TRUE	4	53.895	8458
B21_5chr_p35_20180907	p35	1	20	582554	0.167968	TRUE	6	88.2165	15688
B22_5chr_p35_20180907	p35	1	21	545849	0.169959	TRUE	5	92.5676	14426
B23_5chr_p35_20180907	p35	1	22	742025	0.179273	TRUE	3	18.9446	9909
B24_5chr_p35_20180907	p35	1	23	665196	0.167879	TRUE	5	31.2167	12440
C01_5chr_p35_20180907	p35	2	0	841519	0.183133	TRUE	4	47.3184	14200
C02_5chr_p35_20180907	p35	2	1	1255471	0.142318	TRUE	3	71.726	13677
C03_5chr_p35_20180907	p35	2	2	789496	0.202535	TRUE	6	49.1633	15862
C04_5chr_p35_20180907	p35	2	3	525536	0.227689	TRUE	6	44.9493	12002
C05_5chr_p35_20180907	p35	2	4	633062	0.211738	TRUE	5	55.6151	14508
C06_5chr_p35_20180907	p35	2	5	765572	0.209262	TRUE	4	63.7533	19324
C07_5chr_p35_20180907	p35	2	6	1970610	0.189051	TRUE	3	10.8524	16378
C08_5chr_p35_20180907	p35	2	7	1054455	0.234154	TRUE	3	15.6475	15950
C09_5chr_p35_20180907	p35	2	8	796131	0.187747	TRUE	4	53.6773	15733
C10_5chr_p35_20180907	p35	2	9	681501	0.206559	TRUE	5	40.4209	14787
C11_5chr_p35_20180907	p35	2	10	907129	0.187899	TRUE	6	52.6174	20099
C12_5chr_p35_20180907	p35	2	11	982343	0.182261	TRUE	5	39.4506	21578
C13_5chr_p35_20180907	p35	2	12	972223	0.188536	TRUE	5	28.5603	22528
C14_5chr_p35_20180907	p35	2	13	842519	0.181231	TRUE	4	35.8565	19672
C15_5chr_p35_20180907	p35	2	14	590235	0.237626	TRUE	6	47.3627	15816
C16_5chr_p35_20180907	p35	2	15	630459	0.206969	TRUE	4	54.0556	14093
C17_5chr_p35_20180907	p35	2	16	738006	0.215738	TRUE	6	37.4228	20329
C18_5chr_p35_20180907	p35	2	17	780635	0.183189	TRUE	4	38.2626	14118
C19_5chr_p35_20180907	p35	2	18	686320	0.20808	TRUE	3	98.4781	14733
C20_5chr_p35_20180907	p35	2	19	820693	0.191313	TRUE	3	55.5413	11474
C21_5chr_p35_20180907	p35	2	20	759937	0.223046	TRUE	3	26.009	12564
C22_5chr_p35_20180907	p35	2	21	1161592	0.149563	TRUE	6	41.3377	17309
C23_5chr_p35_20180907	p35	2	22	673843	0.169959	TRUE	4	29.7872	7548
C24_5chr_p35_20180907	p35	2	23	800025	0.186578	TRUE	5	43.5856	13990
D01_5chr_p35_20180907	p35	3	0	641652	0.199147	TRUE	6	26.3798	16365
D02_5chr_p35_20180907	p35	3	1	824438	0.182813	TRUE	4	47.7036	14557
D03_5chr_p35_20180907	p35	3	2	701660	0.207211	TRUE	4	58.2317	15770
D04_5chr_p35_20180907	p35	3	3	665129	0.214474	TRUE	6	41.3037	18664
D05_5chr_p35_20180907	p35	3	4	632644	0.220257	TRUE	5	40.2355	16095
D06_5chr_p35_20180907	p35	3	5	630835	0.228013	TRUE	5	51.2103	18956
D07_5chr_p35_20180907	p35	3	6	1174930	0.201143	TRUE	5	26.8953	20348
D08_5chr_p35_20180907	p35	3	7	798991	0.22809	TRUE	3	30.6487	11179
D09_5chr_p35_20180907	p35	3	8	817661	0.185664	TRUE	4	46.9422	16607
D10_5chr_p35_20180907	p35	3	9	733809	0.209946	TRUE	5	66.766	14690
D11_5chr_p35_20180907	p35	3	10	1207402	0.184956	TRUE	4	97.461	27555
D12_5chr_p35_20180907	p35	3	11	867838	0.205204	TRUE	4	68.7036	23464
D13_5chr_p35_20180907	p35	3	12	1117669	0.165302	TRUE	3	71.8277	22335
D14_5chr_p35_20180907	p35	3	13	895341	0.184417	TRUE	5	45.7006	22807
D15_5chr_p35_20180907	p35	3	14	1478449	0.180177	TRUE	5	94.4183	31043
D16_5chr_p35_20180907	p35	3	15	1146184	0.17815	TRUE	6	59.9387	26210
D17_5chr_p35_20180907	p35	3	16	1098615	0.182576	TRUE	5	57.0581	27499
D18_5chr_p35_20180907	p35	3	17	643953	0.209865	TRUE	5	42.0848	17521
D19_5chr_p35_20180907	p35	3	18	559286	0.230731	TRUE	4	59.3288	13871
D20_5chr_p35_20180907	p35	3	19	879757	0.206659	TRUE	5	73.7539	17882
D21_5chr_p35_20180907	p35	3	20	591276	0.234098	TRUE	5	41.7825	15255
D22_5chr_p35_20180907	p35	3	21	682883	0.200743	TRUE	3	54.839	13825
D23_5chr_p35_20180907	p35	3	22	1124578	0.152544	TRUE	4	61.9585	20946
D24_5chr_p35_20180907	p35	3	23	325852	0.230603	FALSE	4	9.28301
E01_5chr_p35_20180907	p35	4	0	684994	0.15795	TRUE	5	63.8105	15809
E02_5chr_p35_20180907	p35	4	1	594759	0.178053	TRUE	6	61.2808	15554
E03_5chr_p35_20180907	p35	4	2	281021	0.210403	TRUE	4	62.1248	9183
E04_5chr_p35_20180907	p35	4	3	151481	0.212629	TRUE	2	83.4173	4591
E05_5chr_p35_20180907	p35	4	4	486045	0.197239	TRUE	5	95.5611	15653
E06_5chr_p35_20180907	p35	4	5	337447	0.202209	TRUE	4	67.1633	11370
E07_5chr_p35_20180907	p35	4	6	612803	0.178301	TRUE	5	65.108	17007
E08_5chr_p35_20180907	p35	4	7	649295	0.176553	TRUE	5	76.0917	18656
E09_5chr_p35_20180907	p35	4	8	489552	0.177706	TRUE	5	83.0183	13136
E10_5chr_p35_20180907	p35	4	9	776526	0.187326	TRUE	5	102.772	22022
E11_5chr_p35_20180907	p35	4	10	327989	0.188932	TRUE	4	53.447	10322
E12_5chr_p35_20180907	p35	4	11	703307	0.147602	TRUE	6	64.1956	16019
E13_5chr_p35_20180907	p35	4	12	516504	0.1812	TRUE	6	42.6629	14855
E14_5chr_p35_20180907	p35	4	13	719952	0.15012	TRUE	4	66.3536	16897
E15_5chr_p35_20180907	p35	4	14	480802	0.170508	TRUE	5	71.366	14317
E16_5chr_p35_20180907	p35	4	15	760253	0.167876	TRUE	6	86.1339	21128
E17_5chr_p35_20180907	p35	4	16	482334	0.170114	TRUE	4	71.1803	12592
E18_5chr_p35_20180907	p35	4	17	614024	0.147428	TRUE	3	152.995	11227
E19_5chr_p35_20180907	p35	4	18	718270	0.178018	TRUE	6	67.8318	20752
E20_5chr_p35_20180907	p35	4	19	665335	0.19034	TRUE	4	99.6146	18290
E21_5chr_p35_20180907	p35	4	20	389203	0.207416	TRUE	5	76.5894	12278
E22_5chr_p35_20180907	p35	4	21	825975	0.147329	TRUE	5	67.2533	20427
E23_5chr_p35_20180907	p35	4	22	513028	0.151785	TRUE	5	22.0001	10006
E24_5chr_p35_20180907	p35	4	23	533357	0.155958	TRUE	6	24.8209	12667
F01_5chr_p35_20180907	p35	5	0	519666	0.175504	TRUE	6	68.6932	15926
F02_5chr_p35_20180907	p35	5	1	507093	0.183589	TRUE	5	59.0973	15575
F03_5chr_p35_20180907	p35	5	2	314213	0.204211	TRUE	4	111.434	11063
F04_5chr_p35_20180907	p35	5	3	663261	0.212359	TRUE	5	77.0874	22412
F05_5chr_p35_20180907	p35	5	4	544624	0.193877	TRUE	5	93.126	17812
F06_5chr_p35_20180907	p35	5	5	800061	0.203265	TRUE	5	150.31	24846
F07_5chr_p35_20180907	p35	5	6	550812	0.187163	TRUE	3	115.902	9783
F08_5chr_p35_20180907	p35	5	7	834613	0.182645	TRUE	5	76.9053	26444
F09_5chr_p35_20180907	p35	5	8	789071	0.18646	TRUE	6	90.4779	24616
F10_5chr_p35_20180907	p35	5	9	646949	0.223625	TRUE	5	73.0375	23995
F11_5chr_p35_20180907	p35	5	10	716940	0.193719	TRUE	5	97.2447	17904
F12_5chr_p35_20180907	p35	5	11	562593	0.183135	TRUE	5	57.6465	16497
F13_5chr_p35_20180907	p35	5	12	809344	0.181332	TRUE	4	72.5068	22805
F14_5chr_p35_20180907	p35	5	13	438839	0.177718	TRUE	4	57.1082	13522
F15_5chr_p35_20180907	p35	5	14	633066	0.186412	TRUE	5	85.0956	19237
F16_5chr_p35_20180907	p35	5	15	693649	0.163591	TRUE	4	135.454	19275
F17_5chr_p35_20180907	p35	5	16	515617	0.19316	TRUE	5	50.802	14769
F18_5chr_p35_20180907	p35	5	17	580738	0.203946	TRUE	4	116.503	16655
F19_5chr_p35_20180907	p35	5	18	514030	0.199881	TRUE	5	66.039	14992
F20_5chr_p35_20180907	p35	5	19	608993	0.187294	TRUE	5	81.8568	16150
F21_5chr_p35_20180907	p35	5	20	479339	0.217451	TRUE	4	132.778	15895
F22_5chr_p35_20180907	p35	5	21	649030	0.158211	TRUE	4	60.5733	11108
F23_5chr_p35_20180907	p35	5	22	768046	0.168145	TRUE	3	62.1079	18697
F24_5chr_p35_20180907	p35	5	23	381029	0.168851	TRUE	3	47.9259	10150
G01_5chr_p35_20180907	p35	6	0	413660	0.207631	TRUE	5	30.2353	9469
G02_5chr_p35_20180907	p35	6	1	676586	0.157191	TRUE	4	53.7763	14218
G03_5chr_p35_20180907	p35	6	2	330327	0.193879	TRUE	4	48.9623	9681
G04_5chr_p35_20180907	p35	6	3	372067	0.203296	TRUE	5	45.3327	11762
G05_5chr_p35_20180907	p35	6	4	513413	0.196483	TRUE	7	47.3966	14798
G06_5chr_p35_20180907	p35	6	5	953020	0.180468	TRUE	4	39.4178	20879
G07_5chr_p35_20180907	p35	6	6	580389	0.182285	TRUE	4	81.5544	15327
G08_5chr_p35_20180907	p35	6	7	492611	0.18581	TRUE	4	66.4885	11760
G09_5chr_p35_20180907	p35	6	8	1396504	0.163576	TRUE	6	37.2736	29274
G10_5chr_p35_20180907	p35	6	9	486501	0.193878	TRUE	4	26.297	11446
G11_5chr_p35_20180907	p35	6	10	859596	0.174404	TRUE	3	103.28	25337
G12_5chr_p35_20180907	p35	6	11	972245	0.168811	TRUE	4	87.1536	25065
G13_5chr_p35_20180907	p35	6	12	937052	0.160145	TRUE	4	58.7204	23433
G14_5chr_p35_20180907	p35	6	13	672546	0.157996	TRUE	4	44.922	11363
G15_5chr_p35_20180907	p35	6	14	312006	0.199126	TRUE	5	51.3469	9252
G16_5chr_p35_20180907	p35	6	15	925577	0.155139	TRUE	5	79.7095	20676
G17_5chr_p35_20180907	p35	6	16	2570083	0.134299	TRUE	5	192.371	47387
G18_5chr_p35_20180907	p35	6	17	1161110	0.152921	TRUE	5	29.672	15255
G19_5chr_p35_20180907	p35	6	18	790177	0.174096	TRUE	5	59.3855	21170
G20_5chr_p35_20180907	p35	6	19	511737	0.193086	TRUE	5	57.5127	14202
G21_5chr_p35_20180907	p35	6	20	497765	0.200749	TRUE	4	50.0475	15918
G22_5chr_p35_20180907	p35	6	21	620117	0.149014	TRUE	5	41.2289	14003
G23_5chr_p35_20180907	p35	6	22	494120	0.147325	TRUE	5	55.9105	11648
G24_5chr_p35_20180907	p35	6	23	545205	0.153665	TRUE	4	68.5714	13218
H01_5chr_p35_20180907	p35	7	0	469333	0.166098	TRUE	4	46.5976	9065
H02_5chr_p35_20180907	p35	7	1	531108	0.165567	TRUE	4	50.8912	12673
H03_5chr_p35_20180907	p35	7	2	713817	0.165281	TRUE	6	62.0454	18856
H04_5chr_p35_20180907	p35	7	3	944212	0.179957	TRUE	6	95.6321	27842
H05_5chr_p35_20180907	p35	7	4	683128	0.213495	TRUE	5	57.1737	19164
H06_5chr_p35_20180907	p35	7	5	421098	0.234028	TRUE	3	24.3107	6365
H07_5chr_p35_20180907	p35	7	6	921905	0.167834	TRUE	5	76.4498	23716
H08_5chr_p35_20180907	p35	7	7	840247	0.179667	TRUE	5	58.2855	23261
H09_5chr_p35_20180907	p35	7	8	1047256	0.156348	TRUE	5	46.4532	24128
H10_5chr_p35_20180907	p35	7	9	639543	0.189541	TRUE	6	37.4005	16000
H11_5chr_p35_20180907	p35	7	10	758494	0.178285	TRUE	5	62.9788	20811
H12_5chr_p35_20180907	p35	7	11	654280	0.173524	TRUE	3	35.0692	12757
H13_5chr_p35_20180907	p35	7	12	722058	0.171587	TRUE	5	42.8433	20419
H14_5chr_p35_20180907	p35	7	13	501464	0.181829	TRUE	5	50.1948	15012
H15_5chr_p35_20180907	p35	7	14	907885	0.169245	TRUE	5	115.727	22243
H16_5chr_p35_20180907	p35	7	15	608171	0.168876	TRUE	5	71.6916	14869
H17_5chr_p35_20180907	p35	7	16	780774	0.190352	TRUE	4	21.2612	9910
H18_5chr_p35_20180907	p35	7	17	1403087	0.196582	TRUE	5	13.0979	14733
H19_5chr_p35_20180907	p35	7	18	822931	0.187635	TRUE	5	107.457	22599
H20_5chr_p35_20180907	p35	7	19	438227	0.184019	TRUE	4	75.1374	12630
H21_5chr_p35_20180907	p35	7	20	581262	0.202989	TRUE	4	72.359	18231
H22_5chr_p35_20180907	p35	7	21	1035590	0.150462	TRUE	3	62.1963	18786
H23_5chr_p35_20180907	p35	7	22	378561	0.149856	TRUE	2	58.5005	8503
H24_5chr_p35_20180907	p35	7	23	548801	0.163129	TRUE	5	57.4069	14512
I01_5chr_p35_20180907	p35	8	0	1611712	0.246805	FALSE	4	4.60856
I02_5chr_p35_20180907	p35	8	1	2030089	0.203547	FALSE	6	7.89988
I03_5chr_p35_20180907	p35	8	2	997341	0.234343	TRUE	5	20.914	17143
I04_5chr_p35_20180907	p35	8	3	635582	0.236619	TRUE	5	34.2461	13970
I05_5chr_p35_20180907	p35	8	4	598119	0.204857	TRUE	5	81.0488	19277
I06_5chr_p35_20180907	p35	8	5	608816	0.209651	TRUE	4	109.486	18492
I07_5chr_p35_20180907	p35	8	6	466593	0.224218	TRUE	5	87.7057	16394
I08_5chr_p35_20180907	p35	8	7	468228	0.200949	TRUE	3	100.393	14755
I09_5chr_p35_20180907	p35	8	8	235535	0.234103	TRUE	4	41.5966	7841
I10_5chr_p35_20180907	p35	8	9	608319	0.224135	TRUE	5	77.7016	23720
I11_5chr_p35_20180907	p35	8	10	537134	0.215305	TRUE	3	92.5201	17978
I12_5chr_p35_20180907	p35	8	11	1018248	0.182406	TRUE	6	99.7454	28957
I13_5chr_p35_20180907	p35	8	12	1172432	0.173548	TRUE	5	65.5638	30269
I14_5chr_p35_20180907	p35	8	13	710315	0.185443	TRUE	4	66.1495	21084
I15_5chr_p35_20180907	p35	8	14	743086	0.199519	TRUE	5	132.316	20278
I16_5chr_p35_20180907	p35	8	15	427717	0.185598	TRUE	4	83.0551	11362
I17_5chr_p35_20180907	p35	8	16	797090	0.201605	TRUE	7	55.7075	26069
I18_5chr_p35_20180907	p35	8	17	427722	0.184487	TRUE	3	95.9795	7673
I19_5chr_p35_20180907	p35	8	18	399033	0.198333	TRUE	4	53.7393	9030
I20_5chr_p35_20180907	p35	8	19	669784	0.197507	TRUE	6	78.1337	15668
I21_5chr_p35_20180907	p35	8	20	425289	0.218659	TRUE	5	49.8944	13735
I22_5chr_p35_20180907	p35	8	21	694484	0.180243	TRUE	4	81.4694	17088
I23_5chr_p35_20180907	p35	8	22	796744	0.152359	TRUE	4	104.556	20038
I24_5chr_p35_20180907	p35	8	23	376647	0.176539	TRUE	4	68.3746	9220
J01_5chr_p35_20180907	p35	9	0	1204910	0.195554	TRUE	4	10.4811	14287
J02_5chr_p35_20180907	p35	9	1	1371719	0.184279	TRUE	4	20.1038	17417
J03_5chr_p35_20180907	p35	9	2	724716	0.181164	TRUE	5	45.2659	16680
J04_5chr_p35_20180907	p35	9	3	486058	0.209829	TRUE	5	40.6888	12397
J05_5chr_p35_20180907	p35	9	4	632831	0.197518	TRUE	4	49.3043	15643
J06_5chr_p35_20180907	p35	9	5	731032	0.187536	TRUE	3	83.1114	18226
J07_5chr_p35_20180907	p35	9	6	589914	0.185992	TRUE	5	45.4953	11797
J08_5chr_p35_20180907	p35	9	7	894432	0.17228	TRUE	5	81.5936	23980
J09_5chr_p35_20180907	p35	9	8	1332016	0.158376	TRUE	4	81.1865	25844
J10_5chr_p35_20180907	p35	9	9	1570757	0.158028	TRUE	5	88.6368	34855
J11_5chr_p35_20180907	p35	9	10	765603	0.182757	TRUE	5	54.4587	20735
J12_5chr_p35_20180907	p35	9	11	1186932	0.168802	TRUE	5	59.624	28318
J13_5chr_p35_20180907	p35	9	12	895477	0.166407	TRUE	3	53.8379	21361
J14_5chr_p35_20180907	p35	9	13	839787	0.180508	TRUE	3	96.0375	21756
J15_5chr_p35_20180907	p35	9	14	573465	0.180732	TRUE	3	54.9537	13647
J16_5chr_p35_20180907	p35	9	15	1068901	0.161517	TRUE	4	104.804	25105
J17_5chr_p35_20180907	p35	9	16	665953	0.186389	TRUE	4	55.5519	17367
J18_5chr_p35_20180907	p35	9	17	697007	0.161757	TRUE	3	66.1536	15153
J19_5chr_p35_20180907	p35	9	18	1028591	0.168847	TRUE	6	68.3155	23927
J20_5chr_p35_20180907	p35	9	19	863147	0.175988	TRUE	4	69.7244	19484
J21_5chr_p35_20180907	p35	9	20	915251	0.19329	TRUE	4	82.2249	25998
J22_5chr_p35_20180907	p35	9	21	1016388	0.147971	TRUE	5	50.7802	20440
J23_5chr_p35_20180907	p35	9	22	1713024	0.120105	TRUE	5	80.1706	21494
J24_5chr_p35_20180907	p35	9	23	936907	0.167903	TRUE	5	46.4123	22336
K01_5chr_p35_20180907	p35	10	0	604350	0.179005	TRUE	4	36.2329	14872
K02_5chr_p35_20180907	p35	10	1	756770	0.181643	TRUE	3	57.1779	22299
K03_5chr_p35_20180907	p35	10	2	406797	0.213258	TRUE	3	32.695	11522
K04_5chr_p35_20180907	p35	10	3	592274	0.211967	TRUE	5	40.6977	17266
K05_5chr_p35_20180907	p35	10	4	433747	0.217426	TRUE	3	33.6608	11339
K06_5chr_p35_20180907	p35	10	5	536089	0.213952	TRUE	4	42.5634	17356
K07_5chr_p35_20180907	p35	10	6	4207910	0.171856	FALSE	5	2.65945
K08_5chr_p35_20180907	p35	10	7	2973916	0.186727	FALSE	4	5.70366
K09_5chr_p35_20180907	p35	10	8	378525	0.203978	TRUE	3	28.796	9799
K10_5chr_p35_20180907	p35	10	9	508518	0.207103	TRUE	4	33.6431	14053
K11_5chr_p35_20180907	p35	10	10	635259	0.21173	TRUE	5	23.8118	20066
K12_5chr_p35_20180907	p35	10	11	1020842	0.171456	TRUE	5	43.0862	26450
K13_5chr_p35_20180907	p35	10	12	11034107	0.142282	FALSE	6	1.35617
K14_5chr_p35_20180907	p35	10	13	11648106	0.136936	FALSE	3	1.54784
K15_5chr_p35_20180907	p35	10	14	580750	0.208147	TRUE	5	37.8388	18746
K16_5chr_p35_20180907	p35	10	15	591803	0.186924	TRUE	5	31.1861	12639
K17_5chr_p35_20180907	p35	10	16	614755	0.198272	TRUE	6	27.3371	20635
K18_5chr_p35_20180907	p35	10	17	196311	0.249249	FALSE	5	7.09479
K19_5chr_p35_20180907	p35	10	18	593373	0.212108	TRUE	6	31.8324	18639
K20_5chr_p35_20180907	p35	10	19	626906	0.20534	TRUE	4	41.831	21214
K21_5chr_p35_20180907	p35	10	20	449015	0.228875	TRUE	4	40.2369	15415
K22_5chr_p35_20180907	p35	10	21	852814	0.149739	TRUE	3	56.1567	17146
K23_5chr_p35_20180907	p35	10	22	828972	0.194872	TRUE	4	42.843	19500
K24_5chr_p35_20180907	p35	10	23	795553	0.161305	TRUE	5	33.5266	18610
L01_5chr_p35_20180907	p35	11	0	667430	0.169436	TRUE	5	28.027	16485
L02_5chr_p35_20180907	p35	11	1	912275	0.156687	TRUE	4	40.0119	20608
L03_5chr_p35_20180907	p35	11	2	434903	0.17261	TRUE	3	38.2217	11646
L04_5chr_p35_20180907	p35	11	3	501696	0.212811	TRUE	5	31.4029	15891
L05_5chr_p35_20180907	p35	11	4	1029348	0.165464	TRUE	3	76.0525	25156
L06_5chr_p35_20180907	p35	11	5	560417	0.207481	TRUE	4	35.5466	14733
L07_5chr_p35_20180907	p35	11	6	2592147	0.148685	FALSE	3	6.50374
L08_5chr_p35_20180907	p35	11	7	2371230	0.159034	FALSE	5	6.71861
L09_5chr_p35_20180907	p35	11	8	728854	0.163403	TRUE	5	29.6545	17283
L10_5chr_p35_20180907	p35	11	9	683667	0.19523	TRUE	5	34.2864	19014
L11_5chr_p35_20180907	p35	11	10	866449	0.159369	TRUE	4	32.8741	21059
L12_5chr_p35_20180907	p35	11	11	853378	0.185274	TRUE	5	25.0721	22106
L13_5chr_p35_20180907	p35	11	12	13836711	0.126025	FALSE	5	1.51467
L14_5chr_p35_20180907	p35	11	13	11183011	0.126738	FALSE	4	1.51771
L15_5chr_p35_20180907	p35	11	14	1128403	0.16491	TRUE	5	58.9756	29659
L16_5chr_p35_20180907	p35	11	15	706971	0.171817	TRUE	5	46.1736	19513
L17_5chr_p35_20180907	p35	11	16	472396	0.173689	TRUE	3	19.2609	10227
L18_5chr_p35_20180907	p35	11	17	791074	0.157819	TRUE	4	36.5421	17002
L19_5chr_p35_20180907	p35	11	18	612631	0.214311	TRUE	4	25.4175	17108
L20_5chr_p35_20180907	p35	11	19	763935	0.183511	TRUE	5	45.4711	22016
L21_5chr_p35_20180907	p35	11	20	822843	0.157819	TRUE	5	36.7459	16941
L22_5chr_p35_20180907	p35	11	21	673120	0.157797	TRUE	4	32.7407	16346
L23_5chr_p35_20180907	p35	11	22	878384	0.150659	TRUE	4	38.8735	20408
L24_5chr_p35_20180907	p35	11	23	695042	0.160132	TRUE	5	27.4479	15619
M01_5chr_p35_20180907	p35	12	0	745213	0.154939	TRUE	4	88.3698	16829
M02_5chr_p35_20180907	p35	12	1	500762	0.203469	TRUE	5	46.5673	16382
M03_5chr_p35_20180907	p35	12	2	281717	0.217273	TRUE	5	47.492	8386
M04_5chr_p35_20180907	p35	12	3	474931	0.208153	TRUE	5	86.1092	15354
M05_5chr_p35_20180907	p35	12	4	399795	0.231923	TRUE	5	52.356	14624
M06_5chr_p35_20180907	p35	12	5	412668	0.206907	TRUE	3	88.1587	13928
M07_5chr_p35_20180907	p35	12	6	470273	0.202249	TRUE	4	56.7121	16690
M08_5chr_p35_20180907	p35	12	7	492334	0.201397	TRUE	5	73.2741	13747
M09_5chr_p35_20180907	p35	12	8	470508	0.186246	TRUE	4	36.6532	12216
M10_5chr_p35_20180907	p35	12	9	623352	0.199119	TRUE	3	63.671	19091
M11_5chr_p35_20180907	p35	12	10	6619969	0.204256	FALSE	6	2.59429
M12_5chr_p35_20180907	p35	12	11	3688711	0.188746	FALSE	5	3.57739
M13_5chr_p35_20180907	p35	12	12	885888	0.165751	TRUE	4	55.4025	22284
M14_5chr_p35_20180907	p35	12	13	539259	0.187174	TRUE	6	34.7157	17067
M15_5chr_p35_20180907	p35	12	14	360004	0.214326	TRUE	5	29.5562	11362
M16_5chr_p35_20180907	p35	12	15	543662	0.181275	TRUE	4	61.8007	15313
M17_5chr_p35_20180907	p35	12	16	158567	0.220304	TRUE	2	36.0926	3847
M18_5chr_p35_20180907	p35	12	17	433917	0.172877	TRUE	4	85.1937	12957
M19_5chr_p35_20180907	p35	12	18	337389	0.211414	TRUE	5	35.333	9759
M20_5chr_p35_20180907	p35	12	19	532923	0.20389	TRUE	4	92.0175	18097
M21_5chr_p35_20180907	p35	12	20	361128	0.212955	TRUE	4	71.1823	11910
M22_5chr_p35_20180907	p35	12	21	838327	0.146289	TRUE	5	69.7428	17354
M23_5chr_p35_20180907	p35	12	22	505357	0.168706	TRUE	3	97.5255	10688
M24_5chr_p35_20180907	p35	12	23	613449	0.16734	TRUE	6	51.5881	13060
N01_5chr_p35_20180907	p35	13	0	564141	0.164132	TRUE	3	61.1396	13824
N02_5chr_p35_20180907	p35	13	1	652636	0.165205	TRUE	4	69.9061	17002
N03_5chr_p35_20180907	p35	13	2	641003	0.177421	TRUE	5	67.6635	14399
N04_5chr_p35_20180907	p35	13	3	919712	0.178924	TRUE	4	100.058	25217
N05_5chr_p35_20180907	p35	13	4	755019	0.174622	TRUE	5	71.2355	22336
N06_5chr_p35_20180907	p35	13	5	926255	0.178882	TRUE	4	71.2318	25137
N07_5chr_p35_20180907	p35	13	6	455517	0.192498	TRUE	4	55.3559	15308
N08_5chr_p35_20180907	p35	13	7	723296	0.203156	TRUE	5	58.3241	23372
N09_5chr_p35_20180907	p35	13	8	809857	0.170034	TRUE	5	56.6543	20580
N10_5chr_p35_20180907	p35	13	9	474329	0.179379	TRUE	5	44.8366	11792
N11_5chr_p35_20180907	p35	13	10	4197976	0.208489	FALSE	4	3.13574
N12_5chr_p35_20180907	p35	13	11	2069469	0.192665	TRUE	2	17.2644	19110
N13_5chr_p35_20180907	p35	13	12	603848	0.188103	TRUE	4	42.1469	17282
N14_5chr_p35_20180907	p35	13	13	579451	0.180735	TRUE	5	31.1936	17368
N15_5chr_p35_20180907	p35	13	14	295786	0.209295	TRUE	3	77.877	11203
N16_5chr_p35_20180907	p35	13	15	559085	0.204089	TRUE	5	103.963	17688
N17_5chr_p35_20180907	p35	13	16	653151	0.172094	TRUE	5	48.1804	15032
N18_5chr_p35_20180907	p35	13	17	552195	0.154756	TRUE	4	58.7603	13394
N19_5chr_p35_20180907	p35	13	18	346224	0.238809	TRUE	3	73.5513	11085
N20_5chr_p35_20180907	p35	13	19	583656	0.189528	TRUE	3	107.176	16884
N21_5chr_p35_20180907	p35	13	20	301085	0.227754	TRUE	5	63.9464	11183
N22_5chr_p35_20180907	p35	13	21	1021846	0.137394	TRUE	5	51.7282	21255
N23_5chr_p35_20180907	p35	13	22	383232	0.197262	TRUE	5	48.335	9895
N24_5chr_p35_20180907	p35	13	23	491105	0.163486	TRUE	7	35.8501	11116
O01_5chr_p35_20180907	p35	14	0	620684	0.1591	TRUE	6	17.4188	9510
O02_5chr_p35_20180907	p35	14	1	692799	0.15973	TRUE	5	42.4499	14827
O03_5chr_p35_20180907	p35	14	2	1067106	0.151313	TRUE	5	96.6214	25907
O04_5chr_p35_20180907	p35	14	3	625777	0.175857	TRUE	5	69.7847	16873
O05_5chr_p35_20180907	p35	14	4	514656	0.196798	TRUE	6	68.6877	15958
O06_5chr_p35_20180907	p35	14	5	251107	0.187	TRUE	2	63.1241	7691
O07_5chr_p35_20180907	p35	14	6	677008	0.177836	TRUE	5	54.4124	19515
O08_5chr_p35_20180907	p35	14	7	829938	0.193835	TRUE	5	57.5503	21475
O09_5chr_p35_20180907	p35	14	8	491821	0.169709	TRUE	5	54.8091	13335
O10_5chr_p35_20180907	p35	14	9	816576	0.178422	TRUE	5	74.6644	21272
O11_5chr_p35_20180907	p35	14	10	320212	0.213	TRUE	4	25.8745	9569
O12_5chr_p35_20180907	p35	14	11	644164	0.165747	TRUE	4	76.689	14326
O13_5chr_p35_20180907	p35	14	12	946046	0.175706	TRUE	5	29.1713	17698
O14_5chr_p35_20180907	p35	14	13	1293511	0.177023	TRUE	5	17.9808	17934
O15_5chr_p35_20180907	p35	14	14	446288	0.175971	TRUE	5	73.9737	11154
O16_5chr_p35_20180907	p35	14	15	526317	0.194934	TRUE	4	58.9358	12660
O17_5chr_p35_20180907	p35	14	16	282522	0.202072	TRUE	3	46.281	8713
O18_5chr_p35_20180907	p35	14	17	741821	0.158566	TRUE	5	66.4431	19435
O19_5chr_p35_20180907	p35	14	18	757051	0.17761	TRUE	5	44.1426	18779
O20_5chr_p35_20180907	p35	14	19	722500	0.152806	TRUE	5	58.6749	17953
O21_5chr_p35_20180907	p35	14	20	488464	0.178164	TRUE	5	65.2828	13805
O22_5chr_p35_20180907	p35	14	21	827113	0.138401	TRUE	5	49.7147	17046
O23_5chr_p35_20180907	p35	14	22	619802	0.155481	TRUE	3	78.6225	12237
O24_5chr_p35_20180907	p35	14	23	774581	0.1676	TRUE	4	65.3112	16910
P01_5chr_p35_20180907	p35	15	0	199089	0.169457	TRUE	2	19.3317	2653
P02_5chr_p35_20180907	p35	15	1	1253955	0.119652	TRUE	5	42.1358	10104
P03_5chr_p35_20180907	p35	15	2	753250	0.130621	TRUE	4	64.7887	10147
P04_5chr_p35_20180907	p35	15	3	541537	0.150856	TRUE	5	30.5913	11430
P05_5chr_p35_20180907	p35	15	4	753899	0.17046	TRUE	4	67.4183	21246
P06_5chr_p35_20180907	p35	15	5	510647	0.180531	TRUE	5	61.5341	15858
P07_5chr_p35_20180907	p35	15	6	848472	0.18259	TRUE	5	36.7477	20760
P08_5chr_p35_20180907	p35	15	7	1154791	0.17496	TRUE	5	46.6554	24290
P09_5chr_p35_20180907	p35	15	8	510955	0.164796	TRUE	4	50.7265	13496
P10_5chr_p35_20180907	p35	15	9	758102	0.189565	TRUE	4	83.1164	23058
P11_5chr_p35_20180907	p35	15	10	484017	0.194197	TRUE	5	58.3946	12878
P12_5chr_p35_20180907	p35	15	11	495532	0.180246	TRUE	5	45.7466	9404
P13_5chr_p35_20180907	p35	15	12	852726	0.187211	TRUE	5	24.9192	18580
P14_5chr_p35_20180907	p35	15	13	1152425	0.176107	TRUE	5	22.2449	24515
P15_5chr_p35_20180907	p35	15	14	369927	0.175938	TRUE	4	68.9496	10047
P16_5chr_p35_20180907	p35	15	15	667505	0.161419	TRUE	5	55.8956	16886
P17_5chr_p35_20180907	p35	15	16	536743	0.168907	TRUE	5	46.8589	14910
P18_5chr_p35_20180907	p35	15	17	756796	0.14389	TRUE	4	63.7399	15858
P19_5chr_p35_20180907	p35	15	18	519606	0.194513	TRUE	6	54.9255	15168
P20_5chr_p35_20180907	p35	15	19	598123	0.170451	TRUE	5	58.2476	16853
P21_5chr_p35_20180907	p35	15	20	451988	0.180114	TRUE	4	57.8456	9380
P22_5chr_p35_20180907	p35	15	21	894235	0.146552	TRUE	6	42.7859	14631
P23_5chr_p35_20180907	p35	15	22	1128998	0.122463	TRUE	5	41.4377	16472
P24_5chr_p35_20180907	p35	15	23	713915	0.145915	TRUE	6	31.7329	12401
A01_5chr_p36_20180907	p36	0	0	670292	0.138351	FALSE	3	9.9632
A02_5chr_p36_20180907	p36	0	1	507827	0.176594	TRUE	1	14.2817
A03_5chr_p36_20180907	p36	0	2	287931	0.137691	FALSE	2	5.93099
A04_5chr_p36_20180907	p36	0	3	315643	0.146835	FALSE	3	6.6959
A05_5chr_p36_20180907	p36	0	4	946670	0.106738	FALSE	5	9.2055
A06_5chr_p36_20180907	p36	0	5	1927793	0.152715	TRUE	2	30.9388
A07_5chr_p36_20180907	p36	0	6	728518	0.10035	FALSE	5	8.10344
A08_5chr_p36_20180907	p36	0	7	1177998	0.167193	TRUE	3	18.321
A09_5chr_p36_20180907	p36	0	8	212438	0.120083	FALSE	4	4.81384
A10_5chr_p36_20180907	p36	0	9	113569	0.195234	FALSE	1	4.33031
A11_5chr_p36_20180907	p36	0	10	988752	0.117098	TRUE	2	19.6563
A12_5chr_p36_20180907	p36	0	11	102494	0.205268	FALSE	1	6.37023
A13_5chr_p36_20180907	p36	0	12	464522	0.0996067	FALSE	2	7.23244
A14_5chr_p36_20180907	p36	0	13	307190	0.101673	FALSE	2	5.48509
A15_5chr_p36_20180907	p36	0	14	167587	0.166533	TRUE	2	11.2548
A16_5chr_p36_20180907	p36	0	15	393745	0.0935603	FALSE	4	5.8858
A17_5chr_p36_20180907	p36	0	16	611488	0.131698	TRUE	4	13.2511
A18_5chr_p36_20180907	p36	0	17	109438	0.233648	FALSE	14	2.16919
A19_5chr_p36_20180907	p36	0	18	258531	0.181555	FALSE	7	3.18424
A20_5chr_p36_20180907	p36	0	19	296253	0.132684	FALSE	3	4.28917
A21_5chr_p36_20180907	p36	0	20	612356	0.141552	TRUE	4	12.3166
A22_5chr_p36_20180907	p36	0	21	1125905	0.0724381	TRUE	4	12.1614
A23_5chr_p36_20180907	p36	0	22	1097297	0.088123	FALSE	2	2.78016
A24_5chr_p36_20180907	p36	0	23	173350	0.126198	FALSE	1	5.62101
B01_5chr_p36_20180907	p36	1	0	746259	0.164602	FALSE	4	9.16884
B02_5chr_p36_20180907	p36	1	1	583303	0.0955662	TRUE	3	11.0162
B03_5chr_p36_20180907	p36	1	2	1119008	0.116262	TRUE	5	13.369
B04_5chr_p36_20180907	p36	1	3	261145	0.143053	TRUE	2	10.8859
B05_5chr_p36_20180907	p36	1	4	682952	0.135011	TRUE	5	10.91
B06_5chr_p36_20180907	p36	1	5	466337	0.112346	TRUE	4	11.2251
B07_5chr_p36_20180907	p36	1	6	1555660	0.111345	TRUE	3	22.4696
B08_5chr_p36_20180907	p36	1	7	1224201	0.156856	TRUE	4	23.2825
B09_5chr_p36_20180907	p36	1	8	427572	0.092239	TRUE	3	17.4864
B10_5chr_p36_20180907	p36	1	9	1487767	0.104371	TRUE	3	29.0646
B11_5chr_p36_20180907	p36	1	10	435522	0.0949145	TRUE	4	12.0258
B12_5chr_p36_20180907	p36	1	11	960048	0.114157	TRUE	2	19.8967
B13_5chr_p36_20180907	p36	1	12	2818293	0.113727	TRUE	1	22.1444
B14_5chr_p36_20180907	p36	1	13	465451	0.129442	FALSE	4	5.74137
B15_5chr_p36_20180907	p36	1	14	285508	0.116978	FALSE	2	9.26948
B16_5chr_p36_20180907	p36	1	15	557843	0.144886	TRUE	1	13.9998
B17_5chr_p36_20180907	p36	1	16	442153	0.157438	FALSE	3	9.62142
B18_5chr_p36_20180907	p36	1	17	138178	0.188836	TRUE	1	16.0923
B19_5chr_p36_20180907	p36	1	18	1027148	0.174235	TRUE	3	14.7609
B20_5chr_p36_20180907	p36	1	19	322090	0.146572	FALSE	2	7.60426
B21_5chr_p36_20180907	p36	1	20	316718	0.0943895	TRUE	3	18.6132
B22_5chr_p36_20180907	p36	1	21	282009	0.236662	FALSE	1	8.3228
B23_5chr_p36_20180907	p36	1	22	1195951	0.135734	FALSE	5	5.71771
B24_5chr_p36_20180907	p36	1	23	1062399	0.0789555	FALSE	2	3.96557
C01_5chr_p36_20180907	p36	2	0	758320	0.14817	FALSE	2	9.34257
C02_5chr_p36_20180907	p36	2	1	901790	0.144602	FALSE	4	6.32848
C03_5chr_p36_20180907	p36	2	2	1190744	0.12879	FALSE	4	7.2301
C04_5chr_p36_20180907	p36	2	3	975211	0.195508	FALSE	5	5.93354
C05_5chr_p36_20180907	p36	2	4	1234342	0.150844	TRUE	4	10.8597
C06_5chr_p36_20180907	p36	2	5	1259897	0.125685	TRUE	3	10.7785
C07_5chr_p36_20180907	p36	2	6	1887602	0.126866	FALSE	3	6.03853
C08_5chr_p36_20180907	p36	2	7	1856796	0.153619	FALSE	2	8.46171
C09_5chr_p36_20180907	p36	2	8	1802368	0.130527	TRUE	1	43.7382
C10_5chr_p36_20180907	p36	2	9	764809	0.1398	FALSE	4	6.87727
C11_5chr_p36_20180907	p36	2	10	722726	0.137403	TRUE	3	10.7281
C12_5chr_p36_20180907	p36	2	11	685079	0.159087	FALSE	5	4.19808
C13_5chr_p36_20180907	p36	2	12	517607	0.164583	FALSE	2	6.22584
C14_5chr_p36_20180907	p36	2	13	968699	0.123448	FALSE	3	5.93946
C15_5chr_p36_20180907	p36	2	14	841865	0.166794	FALSE	4	9.96948
C16_5chr_p36_20180907	p36	2	15	675829	0.167151	FALSE	5	3.38439
C17_5chr_p36_20180907	p36	2	16	503123	0.179241	FALSE	6	3.41965
C18_5chr_p36_20180907	p36	2	17	1242498	0.156111	FALSE	5	8.07192
C19_5chr_p36_20180907	p36	2	18	1017886	0.1831	TRUE	3	11.939
C20_5chr_p36_20180907	p36	2	19	628433	0.165774	TRUE	1	14.5337
C21_5chr_p36_20180907	p36	2	20	786604	0.159105	TRUE	2	20.8236
C22_5chr_p36_20180907	p36	2	21	1556269	0.122948	FALSE	3	8.73994
C23_5chr_p36_20180907	p36	2	22	693330	0.171405	FALSE	5	3.09221
C24_5chr_p36_20180907	p36	2	23	775842	0.158147	FALSE	5	2.80253
D01_5chr_p36_20180907	p36	3	0	1163106	0.146194	FALSE	6	5.69489
D02_5chr_p36_20180907	p36	3	1	1474823	0.122017	TRUE	4	11.7242
D03_5chr_p36_20180907	p36	3	2	173876	0.161213	FALSE	10	2.41078
D04_5chr_p36_20180907	p36	3	3	712345	0.165211	FALSE	4	4.87158
D05_5chr_p36_20180907	p36	3	4	590063	0.15714	FALSE	7	4.33356
D06_5chr_p36_20180907	p36	3	5	594386	0.156074	FALSE	3	6.10614
[truncated: 1,074 more rows]

## Sheet: Table S6
Statistics of SNV calls between GRCh38 and WI38 genome
variant_size	heterozygous	homozygous
SNP	2528214	1637773
1	253191	260407
2	98900	79013
3	35859	29923
4	59131	36252
5	15522	12407
6	19234	11846
7	5537	4725
8	16690	9257
9	4780	3418
10	8986	5088

## Sheet: SV calls - hg38
											repeatMasker on hg38							repeatMasker on assembly
start_chr	break_start	end_chr	break_end	size	low_confidence	scaffold	sv_scaf_start	sv_scaf_end	type	genotype	Family	overlap	Class	overlap	Name	overlap	isTandem	Family	overlap	Class	overlap	Name	overlap	isTandem
GL000008.2	405	GL000008.2	406	65	TRUE	scaffold00042_hap1	654967	655032	INS	1|0														1
GL000008.2	1267	GL000008.2	1307	40	TRUE	scaffold00042_hap1	655932	655933	DEL	1|0														1
GL000008.2	3991	GL000008.2	4311	2140	TRUE	scaffold00042_hap1	658992	660812	INS	1|0
GL000008.2	88353	GL000008.2	88424	71	TRUE	scaffold00038_hap1	42449781	42449782	DEL	1|0														1
GL000008.2	88494	GL000008.2	88495	72	TRUE	scaffold00038_hap1	42449640	42449712	INS	1|0														1
GL000008.2	88572	GL000008.2	88573	387	TRUE	scaffold00038_hap1	42449175	42449562	INS	1|0														1
GL000008.2	90329	GL000008.2	91279	950	TRUE	scaffold00038_hap1	42447415	42447416	DEL	1|0
GL000008.2	102729	GL000008.2	102786	57	TRUE	scaffold00038_hap1	42436026	42436027	DEL	1|0								ERVL-MaLR	1	LTR	1	MLT1G-int	1	1
GL000008.2	110486	GL000008.2	110487	186	TRUE	scaffold00038_hap1	42428165	42428351	INS	1|0								L1	0.575269	LINE	0.575269	L1MB2	0.575269	1
GL000008.2	116287	GL000008.2	116288	101	TRUE	scaffold00038_hap1	42422250	42422351	INS	1|0								L1	0.940594	LINE	0.940594	L1MCa	0.940594	1
GL000008.2	118123	GL000008.2	118436	197	TRUE	scaffold00038_hap1	42420295	42420411	DEL	1|0								Satellite	1	Satellite	1	CER	1	1
GL000008.2	119016	GL000008.2	119017	96	TRUE	scaffold00038_hap1	42419620	42419716	INS	1|0								Satellite	1	Satellite	1	CER	1	1
GL000008.2	119201	GL000008.2	119202	48	TRUE	scaffold00038_hap1	42419387	42419435	INS	1|0								Satellite	1	Satellite	1	CER	1	1
GL000008.2	119399	GL000008.2	119400	89	TRUE	scaffold00038_hap1	42419100	42419189	INS	1|0								Satellite	1	Satellite	1	CER	1	1
GL000008.2	119875	GL000008.2	119974	99	TRUE	scaffold00038_hap1	42418624	42418625	DEL	1|0								Satellite	1	Satellite	1	CER	1	1
GL000008.2	120610	GL000008.2	120611	287	TRUE	scaffold00038_hap1	42417698	42417985	INS	1|0								Satellite	1	Satellite	1	CER	1	1
GL000008.2	120775	GL000008.2	120776	144	TRUE	scaffold00038_hap1	42417389	42417533	INS	1|0								Satellite	1	Satellite	1	CER	1	1
GL000008.2	121080	GL000008.2	121081	192	TRUE	scaffold00038_hap1	42416890	42417082	INS	1|0								Satellite	1	Satellite	1	CER	1	1
GL000008.2	121693	GL000008.2	121694	48	TRUE	scaffold00038_hap1	42416229	42416277	INS	1|0								Satellite	1	Satellite	1	CER	1	1
GL000008.2	126664	GL000008.2	126665	637	TRUE	scaffold00038_hap1	42410595	42411232	INS	1|0
GL000008.2	137412	GL000008.2	137413	92	TRUE	scaffold00038_hap1	42399753	42399845	INS	1|0								Satellite	1	Satellite	1	HSAT5	1
GL000009.2	92060	GL000009.2	92204	144	TRUE	scaffold00042_hap1	1442458	1442459	DEL	1|0								Satellite	1	Satellite	1	CER	1	1
GL000009.2	94832	GL000009.2	94833	96	TRUE	scaffold00071_hap1	246725	246821	INS	1|0								Satellite	1	Satellite	1	CER	1	1
GL000194.1	7073	GL000194.1	7074	300	TRUE	scaffold00073_hap1	100445	100745	INS	1|0														1
GL000194.1	11134	GL000194.1	11202	68	TRUE	scaffold00073_hap1	104796	104797	DEL	1|0
GL000194.1	24080	GL000194.1	25304	1224	TRUE	scaffold00073_hap1	117674	117675	DEL	1|0								centr	1	Satellite	1	GSATII	1	1
GL000194.1	26757	GL000194.1	26758	49	TRUE	scaffold00073_hap1	119125	119174	INS	1|0								Simple_repeat	1	Simple_repeat	1	(AT)n	1	1
GL000194.1	122847	GL000194.1	122936	89	TRUE	scaffold00073_hap1	215118	215119	DEL	1|0
GL000195.1	34391	GL000195.1	34851	460	TRUE	scaffold00037_hap1	2607696	2607697	DEL	1|0
GL000195.1	55076	GL000195.1	55399	323	TRUE	scaffold00037_hap1	2627938	2627939	DEL	1|0								MIR	1	SINE	1	MIRb	1
GL000195.1	71292	GL000195.1	71345	53	TRUE	scaffold00037_hap1	2579232	2579233	DEL	1|0								L1	1	LINE	1	L1M2	1
GL000195.1	123413	GL000195.1	123462	49	TRUE	scaffold00037_hap1	2695956	2695957	DEL	1|0								Simple_repeat	1	Simple_repeat	1	(AT)n	1	1
GL000195.1	143935	GL000195.1	143983	48	TRUE	scaffold00037_hap1	2716426	2716427	DEL	1|0								L1	1	LINE	1	L1PA11	1
GL000205.2	2219	GL000205.2	2267	48	TRUE	scaffold00060_hap1	102934	102935	DEL	1|0								Satellite	1	Satellite	1	CER	1	1
GL000205.2	2656	GL000205.2	2704	48	TRUE	scaffold00060_hap1	103323	103324	DEL	1|0								Satellite	1	Satellite	1	CER	1	1
GL000205.2	4637	GL000205.2	4733	96	TRUE	scaffold00060_hap1	105256	105257	DEL	1|0								Satellite	1	Satellite	1	CER	1	1
GL000205.2	5815	GL000205.2	5959	144	TRUE	scaffold00060_hap1	106338	106339	DEL	1|0								Satellite	1	Satellite	1	BSR/Beta	1	1
GL000205.2	7198	GL000205.2	7199	47	TRUE	scaffold00060_hap1	107577	107624	INS	1|0								Satellite	1	Satellite	1	CER	1	1
GL000205.2	10639	GL000205.2	10687	48	TRUE	scaffold00060_hap1	111063	111064	DEL	1|0								Satellite	1	Satellite	1	CER	1	1
GL000205.2	11401	GL000205.2	11402	48	TRUE	scaffold00060_hap1	111777	111825	INS	1|0								Satellite	1	Satellite	1	CER	1	1
GL000205.2	12413	GL000205.2	12461	48	TRUE	scaffold00060_hap1	112837	112838	DEL	1|0								Satellite	1	Satellite	1	CER	1	1
GL000205.2	19668	GL000205.2	20962	1294	TRUE	scaffold00060_hap1	120044	120045	DEL	1|0								Satellite	1	Satellite	1	CER	1	1
GL000205.2	26426	GL000205.2	26954	528	TRUE	scaffold00060_hap1	125504	125505	DEL	1|0								Satellite	1	Satellite	1	CER	1	1
GL000205.2	30091	GL000205.2	30139	48	TRUE	scaffold00060_hap1	128642	128643	DEL	1|0								Satellite	1	Satellite	1	CER	1	1
GL000205.2	31048	GL000205.2	31049	48	TRUE	scaffold00060_hap1	129555	129603	INS	1|0								Satellite	1	Satellite	1	CER	1	1
GL000205.2	31937	GL000205.2	32033	96	TRUE	scaffold00060_hap1	130492	130493	DEL	1|0								Satellite	1	Satellite	1	CER	1	1
GL000205.2	64077	GL000205.2	64078	228	TRUE	scaffold00060_hap1	162560	162788	INS	1|0								centr	1	Satellite	1	GSATII	1	1
GL000205.2	71578	GL000205.2	71579	48	TRUE	scaffold00060_hap1	170277	170325	INS	1|0								Satellite	1	Satellite	1	BSR/Beta	1
GL000205.2	71578	GL000205.2	71579	48	TRUE	scaffold00060_hap1	383254	383302	INS	1|0								Satellite	1	Satellite	1	BSR/Beta	1
GL000205.2	84113	GL000205.2	84606	493	TRUE	scaffold00060_hap1	395876	395877	DEL	1|0								ERV1	1	LTR	1	LTR43-int	1
GL000205.2	88086	GL000205.2	88365	279	TRUE	scaffold00060_hap1	399351	399352	DEL	1|0
GL000208.1	9597	GL000208.1	9598	342	TRUE	contig00244_hap1	53210	53552	INS	1|0								centr	1	Satellite	1	ALR/Alpha	1	1
GL000208.1	11151	GL000208.1	11322	171	TRUE	contig00244_hap1	51655	51656	DEL	1|0								centr	1	Satellite	1	ALR/Alpha	1	1
GL000208.1	35903	GL000208.1	37790	507	TRUE	contig00244_hap1	25740	27120	DEL	1|0								centr	0.971739	Satellite	0.971739	ALR/Alpha	0.971739	0.937681
GL000214.1	64314	GL000214.1	64315	382	TRUE	scaffold00067_hap1	58824	59206	INS	1|0														1
GL000214.1	64314	GL000214.1	64315	10752	TRUE	scaffold00071_hap1	182811	193563	INS	1|0														1
GL000214.1	64728	GL000214.1	64729	5018	TRUE	scaffold00067_hap1	53392	58410	INS	1|0														1
GL000214.1	65690	GL000214.1	65691	8126	TRUE	scaffold00071_hap1	173309	181435	INS	1|0														1
GL000214.1	65762	GL000214.1	65763	821	TRUE	scaffold00067_hap1	51542	52363	INS	1|0														1
GL000214.1	69905	GL000214.1	69906	113	TRUE	scaffold00067_hap1	47312	47425	INS	1|0
GL000214.1	122634	GL000214.1	122635	93	TRUE	contig00807_hap1	86664	86757	INS	1|0								Simple_repeat	0.860215	Simple_repeat	0.860215	(CCTT)n	0.860215	0.860215
GL000214.1	124494	GL000214.1	124495	431	TRUE	contig00807_hap1	84370	84801	INS	1|0								acro	1	Satellite	1	ACRO1	1	1
GL000214.1	124873	GL000214.1	124874	144	TRUE	contig00807_hap1	83851	83995	INS	1|0								acro	1	Satellite	1	ACRO1	1	1
GL000214.1	128875	GL000214.1	128876	36	TRUE	contig00807_hap1	79829	79865	INS	1|0								Simple_repeat	1	Simple_repeat	1	(TCCT)n	1	1
GL000214.1	130565	GL000214.1	130566	440	TRUE	contig00807_hap1	77695	78135	INS	1|0								acro	1	Satellite	1	ACRO1	1	1
GL000214.1	130746	GL000214.1	130747	991	TRUE	contig00807_hap1	76523	77514	INS	1|0								acro	1	Satellite	1	ACRO1	1	1
GL000216.2	38678	GL000216.2	38679	151	TRUE	scaffold00070_hap1	326	477	INS	1|0								Simple_repeat	1	Simple_repeat	1	(CCATTCCATT)n	1	1
GL000216.2	42804	GL000216.2	42805	35	TRUE	scaffold00070_hap1	4580	4615	INS	1|0								Simple_repeat	1	Simple_repeat	1	(CCATTCCATT)n	1	1
GL000216.2	45095	GL000216.2	45096	64	TRUE	scaffold00070_hap1	6896	6960	INS	1|0								Simple_repeat	1	Simple_repeat	1	(CCATTCCATT)n	1	1
GL000216.2	46644	GL000216.2	46674	30	TRUE	scaffold00070_hap1	8541	8542	DEL	1|0								Simple_repeat	1	Simple_repeat	1	(CCATTCCATT)n	1	1
GL000216.2	47648	GL000216.2	63620	15916	TRUE	scaffold00070_hap1	9515	9571	DEL	1|0								Simple_repeat	1	Simple_repeat	1	(CCATTCCATT)n	1	1
GL000216.2	65095	GL000216.2	65096	55	TRUE	scaffold00070_hap1	11075	11130	INS	1|0								Simple_repeat	1	Simple_repeat	1	(CCATTCCATT)n	1	1
GL000216.2	68178	GL000216.2	68208	30	TRUE	scaffold00070_hap1	14240	14241	DEL	1|0								Simple_repeat	1	Simple_repeat	1	(CCATTCCATT)n	1	1
GL000216.2	68765	GL000216.2	69095	330	TRUE	scaffold00070_hap1	14787	14788	DEL	1|0								Simple_repeat	1	Simple_repeat	1	(CCATTCCATT)n	1	1
GL000216.2	72111	GL000216.2	72296	185	TRUE	scaffold00070_hap1	17808	17809	DEL	1|0								Simple_repeat	1	Simple_repeat	1	(CCATTCCATT)n	1	1
GL000216.2	81100	GL000216.2	81130	30	TRUE	scaffold00042_hap1	524174	524175	DEL	1|0														1
GL000216.2	83056	GL000216.2	83057	155	TRUE	scaffold00042_hap1	522099	522254	INS	1|0														1
GL000216.2	83299	GL000216.2	83300	51	TRUE	scaffold00042_hap1	521769	521820	INS	1|0														1
GL000216.2	83827	GL000216.2	83867	40	TRUE	scaffold00042_hap1	521225	521226	DEL	1|0														1
GL000216.2	84991	GL000216.2	85046	55	TRUE	scaffold00042_hap1	520031	520032	DEL	1|0														1
GL000216.2	85397	GL000216.2	85398	30	TRUE	scaffold00042_hap1	519651	519681	INS	1|0														1
GL000216.2	103178	GL000216.2	103225	47	TRUE	scaffold00042_hap1	501827	501828	DEL	1|0
GL000216.2	121120	GL000216.2	121121	58	TRUE	scaffold00042_hap1	483875	483933	INS	1|0								L1	1	LINE	1	L1MC4	1	1
GL000216.2	139820	GL000216.2	144596	505	TRUE	scaffold00042_hap1	460910	465181	DEL	1|0
GL000216.2	152752	GL000216.2	152753	342	TRUE	contig00390_hap1	31355	31697	INS	1|0								Satellite	1	Satellite	1	BSR/Beta	1	1
GL000216.2	154453	GL000216.2	154691	62	TRUE	contig00390_hap1	29360	29660	INS	1|0								Satellite	1	Satellite	1	BSR/Beta	1	1
GL000216.2	155542	GL000216.2	155953	411	TRUE	contig00390_hap1	28520	28521	DEL	1|0								Satellite	1	Satellite	1	BSR/Beta	1	1
GL000216.2	158584	GL000216.2	158585	69	TRUE	contig00230_hap1	117678	117747	INS	1|0								Satellite	1	Satellite	1	BSR/Beta	1	1
GL000216.2	167494	GL000216.2	167562	68	TRUE	scaffold00042_hap1	1025375	1025376	DEL	1|0								Satellite	1	Satellite	1	BSR/Beta	1	1
GL000218.1	34968	GL000218.1	34969	58	TRUE	scaffold00037_hap1	1745766	1745824	INS	1|0
GL000219.1	21976	GL000219.1	38998	18006	TRUE	scaffold00037_hap1	2982663	2983647	DEL	1|0								L1	1	LINE	1	L1PA2	1
GL000219.1	40963	GL000219.1	40964	32	TRUE	scaffold00037_hap1	2981647	2981679	INS	1|0								ERV1	1	LTR	1	LTR43	1
GL000219.1	46885	GL000219.1	46886	34	TRUE	scaffold00037_hap1	2975706	2975740	INS	1|0								Alu	0.5	SINE	0.5	AluSq	0.5	1
GL000224.1	38361	GL000224.1	38409	48	TRUE	scaffold00037_hap1	3142320	3142321	DEL	1|0								Satellite	1	Satellite	1	CER	1	1
GL000224.1	90649	GL000224.1	90650	35	TRUE	scaffold00037_hap1	3090065	3090100	INS	1|0														1
GL000225.1	4921	GL000225.1	4989	68	TRUE	scaffold00042_hap1	205391	205392	DEL	1|0								Satellite	1	Satellite	1	BSR/Beta	1	1
GL000225.1	5727	GL000225.1	6877	1150	TRUE	scaffold00042_hap1	206129	206130	DEL	1|0								Satellite	1	Satellite	1	BSR/Beta	1	1
GL000225.1	6904	GL000225.1	9436	166	TRUE	scaffold00042_hap1	206156	208522	DEL	1|0								Satellite	0.778952	Satellite	0.778952	BSR/Beta	0.778952	0.778529
GL000225.1	11478	GL000225.1	11890	412	TRUE	contig00230_hap1	78302	78303	DEL	1|0								Satellite	1	Satellite	1	BSR/Beta	1	1
GL000225.1	15049	GL000225.1	40142	139190	TRUE	scaffold00042_hap1	214136	378419	INS	1|0
GL000225.1	18717	GL000225.1	19537	820	TRUE	contig00230_hap1	85103	85104	DEL	1|0								Satellite	1	Satellite	1	BSR/Beta	1	1
GL000225.1	21331	GL000225.1	21400	69	TRUE	contig00230_hap1	86897	86898	DEL	1|0								Satellite	1	Satellite	1	BSR/Beta	1	1
GL000225.1	34867	GL000225.1	34868	68	TRUE	contig00230_hap1	253977	254045	INS	1|0								Satellite	1	Satellite	1	BSR/Beta	1	1
GL000225.1	35256	GL000225.1	35287	31	TRUE	contig00230_hap1	254434	254435	DEL	1|0								Satellite	1	Satellite	1	BSR/Beta	1	1
GL000225.1	38343	GL000225.1	86666	155705	TRUE	scaffold00042_hap1	1108409	1215791	INS	1|0
GL000225.1	39420	GL000225.1	61228	692	TRUE	contig00230_hap1	258567	281067	INS	1|0
GL000225.1	40169	GL000225.1	40170	273	TRUE	scaffold00042_hap1	378446	378719	INS	1|0								Satellite	1	Satellite	1	BSR/Beta	1	1
GL000225.1	40948	GL000225.1	40949	275	TRUE	scaffold00042_hap1	379499	379774	INS	1|0								Satellite	1	Satellite	1	BSR/Beta	1	1
GL000225.1	41369	GL000225.1	41370	544	TRUE	scaffold00042_hap1	380195	380739	INS	1|0								Satellite	1	Satellite	1	BSR/Beta	1	1
GL000225.1	41534	GL000225.1	41535	68	TRUE	scaffold00042_hap1	380904	380972	INS	1|0								Satellite	1	Satellite	1	BSR/Beta	1	1
GL000225.1	41874	GL000225.1	41875	68	TRUE	scaffold00042_hap1	381312	381380	INS	1|0								Satellite	1	Satellite	1	BSR/Beta	1	1
GL000225.1	61365	GL000225.1	61502	137	TRUE	contig00230_hap1	281203	281204	DEL	1|0								Satellite	1	Satellite	1	BSR/Beta	1	1
GL000225.1	61519	GL000225.1	61520	137	TRUE	contig00230_hap1	281220	281357	INS	1|0								Satellite	1	Satellite	1	BSR/Beta	1	1
GL000225.1	62882	GL000225.1	62967	85	TRUE	contig00230_hap1	282720	282721	DEL	1|0
GL000225.1	65801	GL000225.1	66345	544	TRUE	contig00230_hap1	285553	285554	DEL	1|0								Satellite	1	Satellite	1	BSR/Beta	1	1
GL000225.1	68666	GL000225.1	68667	410	TRUE	contig00230_hap1	287873	288283	INS	1|0								Satellite	1	Satellite	1	BSR/Beta	1	1
GL000225.1	74163	GL000225.1	74231	68	TRUE	contig00230_hap1	293780	293781	DEL	1|0								Satellite	1	Satellite	1	BSR/Beta	1	1
GL000225.1	75158	GL000225.1	75159	68	TRUE	contig00230_hap1	294710	294778	INS	1|0								Satellite	1	Satellite	1	BSR/Beta	1	1
GL000225.1	77104	GL000225.1	77240	136	TRUE	contig00230_hap1	296733	296734	DEL	1|0								Satellite	1	Satellite	1	BSR/Beta	1	1
GL000225.1	77240	GL000225.1	77241	136	TRUE	contig00230_hap1	296733	296869	INS	1|0								Satellite	1	Satellite	1	BSR/Beta	1	1
GL000225.1	85304	GL000225.1	93833	2788	TRUE	contig00230_hap1	304938	310679	DEL	1|0
GL000225.1	85776	GL000225.1	85845	69	TRUE	scaffold00042_hap1	1216612	1216613	DEL	1|0								Satellite	1	Satellite	1	BSR/Beta	1	1
GL000225.1	94949	GL000225.1	94950	68	TRUE	contig00230_hap1	311795	311863	INS	1|0								Satellite	1	Satellite	1	BSR/Beta	1	1
GL000225.1	98239	GL000225.1	98240	136	TRUE	scaffold00042_hap1	426788	426924	INS	1|0								Satellite	1	Satellite	1	BSR/Beta	1	1
GL000225.1	98239	GL000225.1	98240	68	TRUE	contig00230_hap1	315154	315222	INS	1|0								Satellite	1	Satellite	1	BSR/Beta	1	1
GL000225.1	103233	GL000225.1	103301	68	TRUE	scaffold00042_hap1	431918	431919	DEL	1|0								Satellite	1	Satellite	1	BSR/Beta	1	1
GL000225.1	108838	GL000225.1	108839	136	TRUE	scaffold00042_hap1	437455	437591	INS	1|0								Satellite	1	Satellite	1	BSR/Beta	1	1
GL000225.1	112894	GL000225.1	113031	137	TRUE	scaffold00042_hap1	441644	441645	DEL	1|0								Satellite	1	Satellite	1	BSR/Beta	1	1
GL000225.1	124640	GL000225.1	124641	68	TRUE	scaffold00042_hap1	453260	453328	INS	1|0								Satellite	1	Satellite	1	BSR/Beta	1	1
GL000225.1	129506	GL000225.1	129507	135	TRUE	scaffold00042_hap1	458188	458323	INS	1|0								Satellite	1	Satellite	1	BSR/Beta	1	1
KI270438.1	68281	KI270438.1	68282	723	TRUE	contig00488_hap1	6321	7044	INS	1|0								Simple_repeat	1	Simple_repeat	1	(TCCAT)n	1	1
KI270438.1	96232	KI270438.1	96357	125	TRUE	contig00298_hap1	35103	35104	DEL	1|0								Simple_repeat	1	Simple_repeat	1	(TGGAATGGAA)n	1	1
KI270438.1	97420	KI270438.1	97460	40	TRUE	contig00298_hap1	36161	36162	DEL	1|0								Simple_repeat	1	Simple_repeat	1	(TGGAATGGAA)n	1	1
KI270438.1	98427	KI270438.1	98428	50	TRUE	scaffold00044_hap1	286824	286874	INS	1|0								Simple_repeat	1	Simple_repeat	1	(ATGGA)n	1	1
KI270438.1	102284	KI270438.1	103643	1359	TRUE	contig00228_hap1	50623	50624	DEL	1|0								Satellite	1	Satellite	1	(GAATG)n	1	1
KI270438.1	104564	KI270438.1	104620	56	TRUE	contig00228_hap1	51553	51554	DEL	1|0								Satellite	1	Satellite	1	(GAATG)n	1	1
KI270442.1	37891	KI270442.1	37892	80	TRUE	scaffold00046_hap1	2276615	2276695	INS	1|0								Simple_repeat	1	Simple_repeat	1	(TCCAT)n	1	1
KI270442.1	85620	KI270442.1	85621	924	TRUE	scaffold00046_hap1	2217235	2218159	INS	1|0								Satellite	1	Satellite	1	(CATTC)n	1	1
KI270442.1	90048	KI270442.1	90049	45	TRUE	contig00327_hap1	140290	140335	INS	1|0								Satellite	1	Satellite	1	(CATTC)n	1	1
KI270442.1	90533	KI270442.1	90563	30	TRUE	contig00327_hap1	139829	139830	DEL	1|0								Satellite	1	Satellite	1	(CATTC)n	1	1
KI270442.1	91308	KI270442.1	91353	45	TRUE	contig00327_hap1	139102	139103	DEL	1|0								Satellite	1	Satellite	1	(CATTC)n	1	1
KI270442.1	91556	KI270442.1	91557	35	TRUE	contig00327_hap1	138865	138900	INS	1|0								Satellite	1	Satellite	1	(CATTC)n	1	1
KI270442.1	91667	KI270442.1	91712	45	TRUE	contig00327_hap1	138748	138749	DEL	1|0								Satellite	1	Satellite	1	(CATTC)n	1	1
KI270442.1	92416	KI270442.1	92417	45	TRUE	contig00327_hap1	138020	138065	INS	1|0								Satellite	1	Satellite	1	(CATTC)n	1	1
KI270442.1	95846	KI270442.1	95847	90	TRUE	scaffold00046_hap1	2206787	2206877	INS	1|0								Satellite	1	Satellite	1	(CATTC)n	1	1
KI270442.1	112308	KI270442.1	112649	341	TRUE	scaffold00046_hap1	2190362	2190363	DEL	1|0								centr	1	Satellite	1	ALR/Alpha	1	1
KI270442.1	112381	KI270442.1	113554	2212	TRUE	scaffold00046_hap1	2188416	2189455	INS	1|0								centr	1	Satellite	1	ALR/Alpha	1	1
KI270442.1	134196	KI270442.1	134197	169	TRUE	scaffold00046_hap1	2166432	2166601	INS	1|0								centr	1	Satellite	1	ALR/Alpha	1	1
KI270442.1	168379	KI270442.1	168550	171	TRUE	contig00403_hap1	44019	44020	DEL	1|0								centr	1	Satellite	1	ALR/Alpha	1	1
KI270442.1	250353	KI270442.1	250354	239	TRUE	scaffold00059_hap1	407626	407865	INS	1|0
KI270442.1	354386	KI270442.1	354387	171	TRUE	scaffold00046_hap1	1944088	1944259	INS	1|0								centr	1	Satellite	1	ALR/Alpha	1	1
KI270442.1	354523	KI270442.1	357419	3242	TRUE	scaffold00046_hap1	1943953	1944299	DEL	1|0								centr	1	Satellite	1	ALR/Alpha	1	1
KI270519.1	65754	KI270519.1	65755	169	TRUE	contig00206_hap1	71369	71538	INS	1|0								centr	1	Satellite	1	ALR/Alpha	1	1
KI270538.1	55199	KI270538.1	55200	170	TRUE	contig00439_hap1	131285	131455	INS	1|0								centr	1	Satellite	1	ALR/Alpha	1	1
KI270538.1	62199	KI270538.1	62370	171	TRUE	contig00439_hap1	136727	136728	DEL	1|0								centr	1	Satellite	1	ALR/Alpha	1	1
KI270538.1	62756	KI270538.1	63268	512	TRUE	contig00439_hap1	137113	137114	DEL	1|0								centr	1	Satellite	1	ALR/Alpha	1	1
KI270538.1	63693	KI270538.1	64204	511	TRUE	contig00439_hap1	137538	137539	DEL	1|0								centr	1	Satellite	1	ALR/Alpha	1	1
KI270538.1	64373	KI270538.1	64543	170	TRUE	contig00439_hap1	137707	137708	DEL	1|0								centr	1	Satellite	1	ALR/Alpha	1	1
KI270538.1	73679	KI270538.1	73680	172	TRUE	scaffold00022_hap1	46637782	46637954	INS	1|0								centr	1	Satellite	1	ALR/Alpha	1	1
KI270538.1	89349	KI270538.1	89520	171	TRUE	scaffold00022_hap1	46666951	46666952	DEL	1|0								centr	1	Satellite	1	ALR/Alpha	1	1
KI270589.1	22773	KI270589.1	22774	63	TRUE	scaffold00068_hap1	27629	27692	INS	1|0								centr	1	Satellite	1	ALR/Alpha	1	1
KI270589.1	43541	KI270589.1	43601	60	TRUE	contig00342_hap1	159112	159113	DEL	1|0								Simple_repeat	1	Simple_repeat	1	(ATTCC)n	1	1
KI270706.1	4998	KI270706.1	5032	34	TRUE	contig00456_hap1	5408	5409	DEL	1|0														1
KI270706.1	5118	KI270706.1	5224	106	TRUE	contig00456_hap1	5495	5496	DEL	1|0														1
KI270706.1	7838	KI270706.1	7839	128	TRUE	contig00456_hap1	8112	8240	INS	1|0								ERV1	0.921875	LTR	0.921875	MER57-int	0.921875
KI270706.1	19306	KI270706.1	19307	175	TRUE	contig00456_hap1	19719	19894	INS	1|0								L1	1	LINE	1	L1M2	1	1
KI270706.1	25501	KI270706.1	25502	32	TRUE	contig00456_hap1	26075	26107	INS	1|0								Simple_repeat	1	Simple_repeat	1	(TTTTC)n	1	1
KI270706.1	50908	KI270706.1	58478	7566	TRUE	scaffold00042_hap1	1456997	1457001	DEL	1|0
KI270707.1	2437	KI270707.1	2485	48	TRUE	scaffold00037_hap1	1712707	1712708	DEL	1|0								Satellite	1	Satellite	1	CER	1	1
KI270707.1	2636	KI270707.1	2637	48	TRUE	scaffold00037_hap1	1712494	1712542	INS	1|0								Satellite	1	Satellite	1	CER	1	1
KI270707.1	2779	KI270707.1	2780	44	TRUE	scaffold00037_hap1	1712307	1712351	INS	1|0								Satellite	1	Satellite	1	CER	1	1
KI270707.1	2884	KI270707.1	2932	48	TRUE	scaffold00037_hap1	1712201	1712202	DEL	1|0								Satellite	1	Satellite	1	CER	1	1
KI270707.1	3601	KI270707.1	3649	48	TRUE	scaffold00037_hap1	1711532	1711533	DEL	1|0								Satellite	1	Satellite	1	CER	1	1
KI270708.1	71637	KI270708.1	71638	54	TRUE	scaffold00063_hap1	38660	38714	INS	1|0								Satellite	1	Satellite	1	CER	1	1
KI270708.1	74631	KI270708.1	74632	143	TRUE	scaffold00063_hap1	41708	41851	INS	1|0								Satellite	1	Satellite	1	CER	1	1
KI270708.1	79028	KI270708.1	79123	95	TRUE	scaffold00063_hap1	46248	46249	DEL	1|0								Satellite	1	Satellite	1	CER	1	1
KI270708.1	94494	KI270708.1	94542	48	TRUE	scaffold00063_hap1	61619	61620	DEL	1|0								Satellite	1	Satellite	1	CER	1	1
KI270715.1	30895	KI270715.1	30896	4922	TRUE	contig00205_hap1	128770	133692	INS	1|0								centr	1	Satellite	1	ALR/Alpha	1	1
KI270715.1	31102	KI270715.1	31103	6960	TRUE	contig00205_hap1	133899	140859	INS	1|0								centr	1	Satellite	1	ALR/Alpha	1	1
KI270715.1	41420	KI270715.1	46115	1874	TRUE	contig00205_hap1	151176	153997	DEL	1|0								centr	1	Satellite	1	ALR/Alpha	1	1
KI270716.1	30887	KI270716.1	41995	10221	TRUE	contig00205_hap1	100258	101145	INS	1|0								centr	1	Satellite	1	ALR/Alpha	1	1
KI270719.1	109607	KI270719.1	109715	108	TRUE	contig00752_hap1	21383	21384	DEL	1|0								L1	1	LINE	1	L1MC4	1	1
KI270719.1	109805	KI270719.1	109880	75	TRUE	contig00752_hap1	21294	21295	DEL	1|0								Simple_repeat	1	Simple_repeat	1	(AT)n	1	1
KI270722.1	48615	KI270722.1	48616	191	TRUE	scaffold00042_hap1	719311	719502	INS	1|0								Simple_repeat	1	Simple_repeat	1	(TA)n	1	1
KI270722.1	144939	KI270722.1	144940	55	TRUE	contig00014_hap1	4246	4301	INS	1|0								ERVK	1	LTR	1	MER11A	1
KI270722.1	186811	KI270722.1	186846	35	TRUE	contig00014_hap1	46281	46282	DEL	1|0														1
KI270725.1	99535	KI270725.1	99666	131	TRUE	scaffold00044_hap1	981097	981098	DEL	1|0								L1	1	LINE	1	L1MB4	1
KI270727.1	245881	KI270727.1	245882	41	TRUE	scaffold00047_hap1	1008356	1008397	INS	1|0								Simple_repeat	1	Simple_repeat	1	(AGAT)n	1	1
KI270727.1	327951	KI270727.1	327985	34	TRUE	scaffold00047_hap1	926304	926305	DEL	1|0								Low_complexity	1	Low_complexity	1	A-rich	1	1
KI270728.1	94890	KI270728.1	94891	33	TRUE	contig00448_hap1	9836	9869	INS	1|0								L1	1	LINE	1	L1M4c	1
KI270728.1	1073708	KI270728.1	1073742	34	TRUE	scaffold00045_hap1	287593	287594	DEL	1|0														1
KI270728.1	1734726	KI270728.1	1734727	36	TRUE	scaffold00062_hap1	555012	555048	INS	1|0														1
KI270728.1	1741185	KI270728.1	1741507	322	TRUE	scaffold00062_hap1	548567	548568	DEL	1|0								L1	1	LINE	1	L1PA7	1
KI270728.1	1742559	KI270728.1	1742560	158	TRUE	scaffold00062_hap1	547381	547539	INS	1|0								L1	0.626582	LINE	0.626582	L1P4	0.626582	1
KI270729.1	109103	KI270729.1	109104	197	TRUE	contig00031_hap1	70945	71142	INS	1|0														1
KI270729.1	113841	KI270729.1	113903	62	TRUE	contig00031_hap1	66234	66235	DEL	1|0														1
KI270729.1	117064	KI270729.1	117065	183	TRUE	contig00031_hap1	62891	63074	INS	1|0														1
KI270729.1	133058	KI270729.1	133059	49	TRUE	contig00031_hap1	46877	46926	INS	1|0														1
KI270729.1	157447	KI270729.1	157448	576	TRUE	contig00292_hap1	12661	13237	INS	1|0														1
KI270729.1	173684	KI270729.1	173714	30	TRUE	contig00292_hap1	28436	28437	DEL	1|0								Simple_repeat	1	Simple_repeat	1	(TTCCA)n	1	1
KI270735.1	39710	KI270735.1	39850	140	TRUE	contig00558_hap1	88019	88020	DEL	1|0								Satellite	1	Satellite	1	(GAATG)n	1	1
KI270736.1	167451	KI270736.1	167496	45	TRUE	contig00160_hap1	4387	4388	DEL	1|0								Satellite	1	Satellite	1	(GAATG)n	1	1
KI270736.1	179770	KI270736.1	179771	55	TRUE	scaffold00037_hap1	1175287	1175342	INS	1|0														1
KI270736.1	179904	KI270736.1	179905	40	TRUE	scaffold00037_hap1	1175476	1175516	INS	1|0														1
KI270736.1	179988	KI270736.1	180043	55	TRUE	scaffold00037_hap1	1175600	1175601	DEL	1|0														1
KI270736.1	180181	KI270736.1	180182	30	TRUE	scaffold00037_hap1	1175738	1175768	INS	1|0														1
KI270736.1	180364	KI270736.1	180365	65	TRUE	scaffold00037_hap1	1175951	1176016	INS	1|0														1
KI270737.1	75939	KI270737.1	76027	88	TRUE	contig00716_hap1	19737	19738	DEL	1|0														1
KI270738.1	25397	KI270738.1	25433	36	TRUE	contig00714_hap1	102086	102087	DEL	1|0														1
KI270738.1	35662	KI270738.1	35663	101	TRUE	contig00714_hap1	91799	91900	INS	1|0														1
KI270738.1	36327	KI270738.1	36328	49	TRUE	contig00714_hap1	91085	91134	INS	1|0														1
KI270738.1	37097	KI270738.1	41327	1099	TRUE	contig00714_hap1	85582	88713	INS	1|0														1
KI270738.1	38096	KI270738.1	38097	1603	TRUE	contig00714_hap1	87713	89316	INS	1|0														1
KI270738.1	40082	KI270738.1	41181	1099	TRUE	contig00714_hap1	85726	85727	DEL	1|0														1
KI270738.1	47229	KI270738.1	47230	49	TRUE	contig00714_hap1	78507	78556	INS	1|0														1
KI270738.1	59327	KI270738.1	59328	49	TRUE	contig00714_hap1	66350	66399	INS	1|0														1
KI270738.1	67068	KI270738.1	67163	95	TRUE	contig00714_hap1	58541	58542	DEL	1|0														1
KI270738.1	71769	KI270738.1	71770	46	TRUE	contig00714_hap1	53740	53786	INS	1|0														1
KI270738.1	76175	KI270738.1	76227	52	TRUE	contig00714_hap1	49333	49334	DEL	1|0														1
KI270738.1	78593	KI270738.1	78594	219	TRUE	contig00714_hap1	46763	46982	INS	1|0														1
KI270738.1	88439	KI270738.1	88953	514	TRUE	contig00714_hap1	36756	36757	DEL	1|0								centr	1	Satellite	1	ALR/Alpha	1	1
KI270742.1	135404	KI270742.1	135469	65	TRUE	contig00681_hap1	11630	11631	DEL	1|0								ERVK	1	LTR	1	HERVK14-int	1
KI270743.1	135738	KI270743.1	135768	30	TRUE	scaffold00067_hap1	79434	79435	DEL	1|0
KI270743.1	136591	KI270743.1	136592	33	TRUE	scaffold00067_hap1	78583	78616	INS	1|0								ERVL-MaLR	1	LTR	1	MSTA-int	1
KI270743.1	153526	KI270743.1	155044	1519	TRUE	scaffold00046_hap1	396877	398396	INV	1|0
KI270743.1	203077	KI270743.1	203322	245	TRUE	scaffold00046_hap1	348877	348878	DEL	1|0														1
KI270744.1	84537	KI270744.1	84538	58	TRUE	scaffold00071_hap1	103298	103356	INS	1|0
KI270744.1	86585	KI270744.1	86618	33	TRUE	scaffold00071_hap1	101249	101250	DEL	1|0								L1	1	LINE	1	L1PA5	1
KI270744.1	145071	KI270744.1	145072	102	TRUE	scaffold00071_hap1	42747	42849	INS	1|0														1
KI270746.1	44256	KI270746.1	44450	171	TRUE	contig00810_hap1	112695	113060	INS	1|0
KI270746.1	57811	KI270746.1	58380	569	TRUE	contig00008_hap1	51133	51134	DEL	1|0
KI270747.1	107757	KI270747.1	107758	1698	TRUE	contig00650_hap1	31146	32844	INS	1|0								centr	1	Satellite	1	ALR/Alpha	1	1
KI270747.1	111747	KI270747.1	165677	40618	TRUE	contig00650_hap1	36834	50146	DEL	1|0								centr	1	Satellite	1	ALR/Alpha	1	1
KI270749.1	130543	KI270749.1	130544	56	TRUE	contig00075_hap1	19809	19865	INS	1|0								telo	1	Satellite	1	TAR1	1	1
KI270749.1	134199	KI270749.1	134254	55	TRUE	contig00075_hap1	23497	23498	DEL	1|0
KI270749.1	141829	KI270749.1	142213	384	TRUE	contig00075_hap1	31069	31070	DEL	1|0								Simple_repeat	1	Simple_repeat	1	(ATGAA)n	1	1
KI270750.1	71547	KI270750.1	71548	93	TRUE	scaffold00049_hap1	548949	549042	INS	1|0								Simple_repeat	1	Simple_repeat	1	(TGGTGA)n	1
KI270750.1	90094	KI270750.1	90095	312	TRUE	scaffold00049_hap1	567635	567947	INS	1|0								Simple_repeat	1	Simple_repeat	1	(TGATGG)n	1
KI270750.1	99694	KI270750.1	99728	34	TRUE	scaffold00049_hap1	577543	577544	DEL	1|0														1
KI270750.1	117754	KI270750.1	117755	112	TRUE	scaffold00049_hap1	595574	595686	INS	1|0														1
KI270753.1	15209	KI270753.1	15244	35	TRUE	contig00325_hap1	18574	18575	DEL	1|0														1
KI270753.1	21390	KI270753.1	21391	653	TRUE	contig00325_hap1	24734	25387	INS	1|0														1
KI270757.1	26054	KI270757.1	26566	512	TRUE	contig00169_hap1	93436	93437	DEL	1|0								centr	1	Satellite	1	ALR/Alpha	1	1
KI270757.1	26582	KI270757.1	26583	512	TRUE	contig00169_hap1	92909	93421	INS	1|0								centr	1	Satellite	1	ALR/Alpha	1	1
KI270757.1	27330	KI270757.1	28011	681	TRUE	contig00169_hap1	92160	92161	DEL	1|0								centr	1	Satellite	1	ALR/Alpha	1	1
KI270757.1	32855	KI270757.1	32856	106	TRUE	contig00169_hap1	87214	87320	INS	1|0								centr	1	Satellite	1	ALR/Alpha	1	1
KI270757.1	34586	KI270757.1	34587	143	TRUE	contig00169_hap1	85341	85484	INS	1|0								Alu	0.874126	SINE	0.874126	AluYg6	0.874126	1
KI270757.1	34963	KI270757.1	35303	340	TRUE	contig00169_hap1	84963	84964	DEL	1|0								centr	1	Satellite	1	ALR/Alpha	1	1
KI270757.1	36459	KI270757.1	36460	65	TRUE	contig00169_hap1	83743	83808	INS	1|0								centr	1	Satellite	1	ALR/Alpha	1	1
chr1	789469	chr1	789488	2357	TRUE	scaffold00011_hap1	47111	49449	INS	1|0							1							1
chr1	820879	chr1	820880	245	TRUE	scaffold00011_hap1	80832	81077	INS	1|0							1							1
chr1	822427	chr1	822462	35	TRUE	scaffold00011_hap1	82625	82626	DEL	1|0							1							1
chr1	839457	chr1	839499	42	TRUE	scaffold00011_hap1	99627	99628	DEL	1|0	L1	1	LINE	1	L1M4b	1	1							1
chr1	853474	chr1	853523	49	TRUE	scaffold00011_hap1	113607	113608	DEL	1|0							1							1
chr1	866615	chr1	866616	49	TRUE	scaffold00011_hap1	126704	126753	INS	1|0							1							1
chr1	866851	chr1	866852	97	TRUE	scaffold00011_hap1	126989	127086	INS	1|0							1							1
chr1	876024	chr1	876025	2172	TRUE	scaffold00011_hap1	136271	138443	INS	1|0							1	Simple_repeat	1	Simple_repeat	1	(CCCCACACTC)n	1	1
chr1	876287	chr1	876288	408	TRUE	scaffold00011_hap1	138725	139133	INS	1|0							1	Simple_repeat	1	Simple_repeat	1	(CCCCACACTC)n	1	1
chr1	886224	chr1	886225	30	TRUE	scaffold00011_hap1	149069	149099	INS	1|0	L1	1	LINE	1	L1PA7	1		L1	1	LINE	1	L1PA10	1	1
chr1	904478	chr1	904576	98	TRUE	scaffold00011_hap1	167325	167326	DEL	1|0							1							1
chr1	909077	chr1	909253	176	TRUE	scaffold00011_hap1	171837	171838	DEL	1|0							1							1
chr1	909362	chr1	909498	136	TRUE	scaffold00011_hap1	171946	171947	DEL	1|0							1							1
chr1	933966	chr1	934805	839	TRUE	scaffold00011_hap1	196412	196413	DEL	1|0							1
chr1	936270	chr1	936307	37	TRUE	scaffold00011_hap1	197877	197878	DEL	1|0							1							1
chr1	939436	chr1	939485	49	TRUE	scaffold00011_hap1	201006	201007	DEL	1|0							1
chr1	948711	chr1	948712	41	TRUE	scaffold00011_hap1	210223	210264	INS	1|0														1
chr1	964631	chr1	964744	113	TRUE	scaffold00011_hap1	226191	226192	DEL	1|0							1							1
chr1	964774	chr1	964775	41	TRUE	scaffold00011_hap1	226221	226262	INS	1|0							1							1
chr1	976747	chr1	976748	276	TRUE	scaffold00011_hap1	238228	238504	INS	1|0							1							1
chr1	976903	chr1	976904	60	TRUE	scaffold00011_hap1	238659	238719	INS	1|0							1							1
chr1	977090	chr1	977091	372	TRUE	scaffold00011_hap1	238904	239276	INS	1|0							1							1
chr1	977348	chr1	977349	123	TRUE	scaffold00011_hap1	239533	239656	INS	1|0							1							1
chr1	977572	chr1	977573	30	TRUE	scaffold00011_hap1	239878	239908	INS	1|0							1							1
chr1	988819	chr1	988820	46	TRUE	scaffold00011_hap1	251197	251243	INS	1|0							1							1
chr1	996282	chr1	996283	66	TRUE	scaffold00011_hap1	258672	258738	INS	1|0							1							1
chr1	996728	chr1	996729	152	TRUE	scaffold00011_hap1	259184	259336	INS	1|0							1							1
chr1	998764	chr1	998765	43	TRUE	scaffold00011_hap1	261372	261415	INS	1|0							1							1
chr1	1028708	chr1	1028715	244	TRUE	scaffold00011_hap1	291115	291352	DEL	1|0							1							1
chr1	1028962	chr1	1028963	63	TRUE	scaffold00011_hap1	291363	291426	INS	1|0							1							1
chr1	1028984	chr1	1028985	121	TRUE	scaffold00011_hap1	291448	291569	INS	1|0							1							1
chr1	1029671	chr1	1029672	122	TRUE	scaffold00011_hap1	292276	292398	INS	1|0							1							1
chr1	1030222	chr1	1030223	65	TRUE	scaffold00011_hap1	292937	293002	INS	1|0							1							1
chr1	1030381	chr1	1030382	158	TRUE	scaffold00011_hap1	293161	293319	INS	1|0							1							1
chr1	1030569	chr1	1030570	144	TRUE	scaffold00011_hap1	293507	293651	INS	1|0							1							1
chr1	1030900	chr1	1030935	35	TRUE	scaffold00011_hap1	293978	293979	DEL	1|0							1							1
chr1	1041776	chr1	1041823	47	TRUE	scaffold00011_hap1	304805	304806	DEL	1|0							1							1
chr1	1065077	chr1	1065139	62	TRUE	scaffold00011_hap1	328019	328020	DEL	1|0							1							1
chr1	1068824	chr1	1068825	78	TRUE	scaffold00011_hap1	331699	331777	INS	1|0							1							1
chr1	1078469	chr1	1078470	58	TRUE	scaffold00011_hap1	341410	341468	INS	1|0							1							1
chr1	1078979	chr1	1078980	87	TRUE	scaffold00011_hap1	342000	342087	INS	1|0							1							1
chr1	1079281	chr1	1079282	87	TRUE	scaffold00011_hap1	342384	342471	INS	1|0							1	L1	0.977011	LINE	0.977011	L1M3e	0.977011	1
chr1	1079375	chr1	1079376	175	TRUE	scaffold00011_hap1	342565	342740	INS	1|0							1	L1	0.605714	LINE	0.605714	L1M3e	0.605714	1
chr1	1080715	chr1	1080716	238	TRUE	scaffold00011_hap1	344087	344325	INS	1|0							1							1
chr1	1080855	chr1	1080856	61	TRUE	scaffold00011_hap1	344465	344526	INS	1|0							1							1
chr1	1134771	chr1	1134772	117	TRUE	scaffold00011_hap1	398438	398555	INS	1|0							1							1
chr1	1139216	chr1	1139709	549	TRUE	scaffold00011_hap1	402946	403002	DEL	1|0							1							1
chr1	1139899	chr1	1140082	183	TRUE	scaffold00011_hap1	403136	403137	DEL	1|0							1							1
chr1	1140472	chr1	1140594	122	TRUE	scaffold00011_hap1	403526	403527	DEL	1|0							1							1
chr1	1141363	chr1	1141364	59	TRUE	scaffold00011_hap1	404295	404354	INS	1|0							1							1
chr1	1168009	chr1	1168044	35	TRUE	scaffold00011_hap1	430996	430997	DEL	1|0	Low_complexity	1	Low_complexity	1	G-rich	1	1	Low_complexity	1	Low_complexity	1	G-rich	1	1
chr1	1184689	chr1	1184690	215	TRUE	scaffold00011_hap1	447644	447859	INS	1|0							1							1
chr1	1192629	chr1	1192630	96	TRUE	scaffold00011_hap1	455799	455895	INS	1|0							1							1
chr1	1202248	chr1	1202249	132	TRUE	scaffold00011_hap1	465513	465645	INS	1|0							1	L1	1	LINE	1	L1M3e	1	1
chr1	1202416	chr1	1202417	57	TRUE	scaffold00011_hap1	465832	465889	INS	1|0							1							1
chr1	1202530	chr1	1202531	38	TRUE	scaffold00011_hap1	466003	466041	INS	1|0							1							1
chr1	1240648	chr1	1240649	44	TRUE	scaffold00011_hap1	504161	504205	INS	1|0														1
chr1	1245158	chr1	1245159	434	TRUE	scaffold00011_hap1	508715	509149	INS	1|0							1							1
chr1	1249026	chr1	1249027	66	TRUE	scaffold00011_hap1	513017	513083	INS	1|0							1							1
chr1	1284181	chr1	1284182	209	TRUE	scaffold00011_hap1	548236	548445	INS	1|0							1							1
chr1	1288120	chr1	1288954	753	TRUE	scaffold00011_hap1	552382	552463	DEL	1|0							0.905276
chr1	1289205	chr1	1289395	190	TRUE	scaffold00011_hap1	552706	552707	DEL	1|0							1
chr1	1289556	chr1	1289847	291	TRUE	scaffold00011_hap1	552863	552864	DEL	1|0							1
chr1	1290054	chr1	1290128	74	TRUE	scaffold00011_hap1	553070	553071	DEL	1|0							1
chr1	1315752	chr1	1315794	42	TRUE	scaffold00011_hap1	578724	578725	DEL	1|0	Low_complexity	1	Low_complexity	1	GA-rich	1	1	Low_complexity	1	Low_complexity	1	GA-rich	1	1
chr1	1324172	chr1	1324173	72	TRUE	scaffold00011_hap1	587101	587173	INS	1|0							1							1
chr1	1339884	chr1	1339885	39	TRUE	scaffold00011_hap1	602885	602924	INS	1|0							1							1
chr1	1349974	chr1	1351054	1080	TRUE	scaffold00011_hap1	613016	613017	DEL	1|0							0.996296							1
chr1	1382625	chr1	1382626	1390	TRUE	scaffold00011_hap1	644583	645973	INS	1|0							1							1
chr1	1427468	chr1	1427469	660	TRUE	scaffold00011_hap1	690820	691480	INS	1|0							1							1
chr1	1428000	chr1	1428001	409	TRUE	scaffold00011_hap1	692012	692421	INS	1|0	Simple_repeat	1	Simple_repeat	1	(GGAGG)n	1	1	Low_complexity	1	Low_complexity	1	GA-rich	1	1
chr1	1428120	chr1	1428121	50	TRUE	scaffold00011_hap1	692541	692591	INS	1|0	Simple_repeat	1	Simple_repeat	1	(GGAGG)n	1	1	Low_complexity	1	Low_complexity	1	GA-rich	1	1
chr1	1442855	chr1	1442856	32	TRUE	scaffold00011_hap1	707326	707358	INS	1|0							1							1
chr1	1461705	chr1	1461743	38	TRUE	scaffold00011_hap1	726189	726190	DEL	1|0							1							1
chr1	1469763	chr1	1470201	438	TRUE	scaffold00011_hap1	734199	734200	DEL	1|0	ERV1	0.988584	LTR	0.988584	LTR7B	0.988584		Alu	1	SINE	1	AluSx	1
chr1	1515274	chr1	1515941	667	TRUE	scaffold00011_hap1	740891	740892	DEL	1|0								Alu	1	SINE	1	AluSx1	1
chr1	1516631	chr1	1516632	125	TRUE	scaffold00011_hap1	741581	741706	INS	1|0	Alu	1	SINE	1	AluSx1	1		Alu	1	SINE	1	AluSx1	1
chr1	1518828	chr1	1518829	391	TRUE	scaffold00011_hap1	743905	744296	INS	1|0							1							1
chr1	1565661	chr1	1565662	105	TRUE	scaffold00011_hap1	791053	791158	INS	1|0
chr1	1605526	chr1	1605566	40	TRUE	scaffold00011_hap1	831021	831022	DEL	1|0							1							1
chr1	1651433	chr1	1651481	48	TRUE	scaffold00011_hap1	876855	876856	DEL	1|0							1							1
chr1	1666974	chr1	1667141	167	TRUE	scaffold00011_hap1	892339	892340	DEL	1|0	Alu	0.862275	SINE	0.862275	AluSx	0.862275		Alu	1	SINE	1	AluYk2	1	1
chr1	1717604	chr1	1717655	51	TRUE	scaffold00011_hap1	942756	942757	DEL	1|0							1							1
chr1	1749605	chr1	1749606	50	TRUE	scaffold00011_hap1	974722	974772	INS	1|0	Simple_repeat	1	Simple_repeat	1	(TG)n	1		Simple_repeat	1	Simple_repeat	1	(TG)n	1	1
chr1	1845824	chr1	1845854	30	FALSE	scaffold00011_hap1	1070981	1070982	DEL	1|1	Simple_repeat	1	Simple_repeat	1	(AC)n	1	1	L1	1	LINE	1	L1MB5	1
chr1	1924223	chr1	1924224	103	FALSE	scaffold00011_hap1	1149372	1149475	INS	1|1							1							1
chr1	1929384	chr1	1929385	1056	FALSE	scaffold00011_hap1	1154634	1155690	INS	1|1							1	Low_complexity	1	Low_complexity	1	G-rich	1	0.973485
chr1	1934260	chr1	1934261	102	FALSE	scaffold00011_hap1	1160565	1160667	INS	1|1							1							1
chr1	1934848	chr1	1935446	598	FALSE	scaffold00011_hap1	1161259	1161260	DEL	1|0							1							1
chr1	1937841	chr1	1937872	31	FALSE	scaffold00011_hap1	1163652	1163653	DEL	1|0
chr1	1948934	chr1	1948935	111	FALSE	scaffold00011_hap1	1174719	1174830	INS	1|1	Simple_repeat	1	Simple_repeat	1	(TTCC)n	1	1	Simple_repeat	1	Simple_repeat	1	(TTCC)n	1	1
chr1	1948934	chr1	1948935	109	TRUE	scaffold00011_hap1	1230834	1230943	INS	1|0	Simple_repeat	1	Simple_repeat	1	(TTCC)n	1	1	Simple_repeat	1	Simple_repeat	1	(TTCC)n	1	1
chr1	1949056	chr1	1949057	108	FALSE	scaffold00011_hap1	1174952	1175060	INS	1|1	Simple_repeat	1	Simple_repeat	1	(TTCC)n	1	1	Simple_repeat	1	Simple_repeat	1	(TTCC)n	1	1
chr1	1955080	chr1	1955081	36	FALSE	scaffold00011_hap1	1237102	1237138	INS	1|1							1							1
chr1	1968924	chr1	1968993	69	FALSE	scaffold00011_hap1	1194937	1194938	DEL	1|1							1
chr1	1968924	chr1	1968993	69	FALSE	scaffold00011_hap1	1250990	1250991	DEL	1|1							1
chr1	1978993	chr1	1979167	174	FALSE	scaffold00011_hap1	1204945	1204946	DEL	1|1							1							1
chr1	1979575	chr1	1979865	290	FALSE	scaffold00011_hap1	1205351	1205352	DEL	1|1							1							1
chr1	1980058	chr1	1980275	217	FALSE	scaffold00011_hap1	1205544	1205545	DEL	1|1							1							1
chr1	1981447	chr1	1981448	105	FALSE	scaffold00011_hap1	1206716	1206821	INS	1|1							1							1
chr1	1981554	chr1	1981555	139	FALSE	scaffold00011_hap1	1206928	1207067	INS	1|1							1							1
chr1	1981820	chr1	1981821	70	FALSE	scaffold00011_hap1	1263819	1263889	INS	1|1							1							1
chr1	1982175	chr1	1982176	178	FALSE	scaffold00011_hap1	1207698	1207876	INS	1|1	Simple_repeat	1	Simple_repeat	1	(ACAG)n	1	1							1
chr1	1982210	chr1	1982211	35	FALSE	scaffold00011_hap1	1207911	1207946	INS	1|1							1							1
chr1	1993704	chr1	1993705	292	TRUE	scaffold00011_hap1	1219434	1219726	INS	1|0	Alu	1	SINE	1	AluY	1								1
chr1	1993704	chr1	1993705	147	FALSE	scaffold00011_hap1	1275775	1275922	INS	1|1	Alu	1	SINE	1	AluY	1		Alu	0.945578	SINE	0.945578	FLAM_C	0.945578
chr1	2019215	chr1	2019216	229	FALSE	scaffold00011_hap1	1301405	1301634	INS	1|1								Low_complexity	1	Low_complexity	1	G-rich	1	1
chr1	2106627	chr1	2106628	530	FALSE	scaffold00011_hap1	1389070	1389600	INS	1|0							1							1
chr1	2110021	chr1	2110116	95	FALSE	scaffold00011_hap1	1392995	1392996	DEL	1|0							1
chr1	2121519	chr1	2121520	33	TRUE	scaffold00011_hap1	1404412	1404445	INS	1|0							1							1
chr1	2121667	chr1	2124296	2869	FALSE	scaffold00011_hap1	1404593	1410091	INS	1|1							1							1
chr1	2124327	chr1	2124328	447	TRUE	scaffold00011_hap1	1410122	1410569	INS	1|0							1							1
chr1	2142378	chr1	2142379	41	FALSE	scaffold00011_hap1	1428613	1428654	INS	1|1							1							1
chr1	2147719	chr1	2147720	131	FALSE	scaffold00011_hap1	1433996	1434127	INS	1|1	Simple_repeat	1	Simple_repeat	1	(TCCA)n	1	1	Simple_repeat	1	Simple_repeat	1	(TCCA)n	1	1
chr1	2281043	chr1	2281044	109	FALSE	scaffold00011_hap1	1567439	1567548	INS	1|0							1							1
chr1	2281805	chr1	2281806	201	FALSE	scaffold00011_hap1	1568321	1568522	INS	1|0							1							1
chr1	2281904	chr1	2281905	159	FALSE	scaffold00011_hap1	1568618	1568777	INS	1|0							1							1
chr1	2281961	chr1	2281962	559	FALSE	scaffold00011_hap1	1568830	1569389	INS	1|0							1							1
chr1	2289589	chr1	2289590	41	FALSE	scaffold00011_hap1	1577015	1577056	INS	1|0							1							1
chr1	2325140	chr1	2325141	3811	FALSE	scaffold00011_hap1	1612611	1616422	INS	1|1	Simple_repeat	1	Simple_repeat	1	(TCTT)n	1	1	Simple_repeat	1	Simple_repeat	1	(TTCC)n	1	1
chr1	2393034	chr1	2393035	42	FALSE	scaffold00011_hap1	1684305	1684347	INS	1|1
chr1	2401341	chr1	2401342	253	FALSE	scaffold00011_hap1	1692656	1692909	INS	1|1	Simple_repeat	1	Simple_repeat	1	(CCTCCCT)n	1	1	Simple_repeat	1	Simple_repeat	1	(CCTCCCT)n	1	1
chr1	2440512	chr1	2440513	1148	TRUE	scaffold00011_hap1	1732092	1733240	INS	1|0							1							1
chr1	2450676	chr1	2450677	128	FALSE	scaffold00011_hap1	1743415	1743543	INS	1|0							1							1
chr1	2459427	chr1	2459477	50	FALSE	scaffold00011_hap1	1752292	1752293	DEL	1|0							1							1
chr1	2459587	chr1	2459635	48	FALSE	scaffold00011_hap1	1752402	1752403	DEL	1|0							1							1
chr1	2522791	chr1	2522792	555	FALSE	scaffold00011_hap1	1815568	1816123	INS	1|1							1							1
chr1	2592531	chr1	2592580	49	FALSE	scaffold00011_hap1	1885875	1885876	DEL	1|0							1							1
chr1	2635072	chr1	2635073	55	FALSE	scaffold00011_hap1	1928337	1928392	INS	1|0							1							1
chr1	2652117	chr1	2652118	159	TRUE	scaffold00011_hap1	1945436	1945595	INS	1|0							1							1
chr1	2656143	chr1	2683331	44492	TRUE	scaffold00011_hap1	2053137	2070441	INS	1|0							1							1
chr1	2656187	chr1	2656348	161	TRUE	scaffold00011_hap1	2070485	2070486	DEL	1|0							1							1
chr1	2660696	chr1	2661258	562	TRUE	scaffold00011_hap1	2074822	2074823	DEL	1|0							1							1
chr1	2662828	chr1	2662829	80	TRUE	scaffold00011_hap1	2076382	2076462	INS	1|0							1							1
chr1	2663023	chr1	2663024	481	TRUE	scaffold00011_hap1	2076658	2077139	INS	1|0							1							1
chr1	2663919	chr1	2664039	120	TRUE	scaffold00011_hap1	2078040	2078041	DEL	1|0							1							1
chr1	2667444	chr1	2667445	80	FALSE	scaffold00011_hap1	2081445	2081525	INS	1|1							1							1
chr1	2667639	chr1	2667640	481	FALSE	scaffold00011_hap1	2081721	2082202	INS	1|1							1							1
chr1	2675106	chr1	2675146	40	TRUE	scaffold00011_hap1	2089669	2089670	DEL	1|0							1							1
chr1	2677919	chr1	2677920	1443	TRUE	scaffold00011_hap1	2092442	2093885	INS	1|0							1							1
chr1	2682749	chr1	2682750	201	TRUE	scaffold00011_hap1	2052354	2052555	INS	1|0							1							1
chr1	2688198	chr1	2694178	8013	TRUE	contig00478_hap1	22822	36815	INS	1|0							1							1
chr1	2750145	chr1	2750788	643	TRUE	scaffold00011_hap1	2255424	2255425	DEL	1|0							1							1
chr1	2750874	chr1	2753403	2529	TRUE	scaffold00011_hap1	2255510	2255511	DEL	1|0							1							1
chr1	2762401	chr1	2762402	805	FALSE	scaffold00011_hap1	2264509	2265314	INS	1|1							1							1
chr1	2762522	chr1	2762523	762	FALSE	scaffold00011_hap1	2265435	2266197	INS	1|1							1							1
chr1	2763324	chr1	2763325	565	FALSE	scaffold00011_hap1	2267000	2267565	INS	1|1							1							1
chr1	2763763	chr1	2763764	215	FALSE	scaffold00011_hap1	2268004	2268219	INS	1|1							1							1
chr1	2763995	chr1	2763996	842	FALSE	scaffold00011_hap1	2268436	2269278	INS	1|1							1							1
chr1	2765710	chr1	2765711	159	FALSE	scaffold00011_hap1	2270992	2271151	INS	1|1							1							1
chr1	2767395	chr1	2767396	203	FALSE	scaffold00011_hap1	2272836	2273039	INS	1|1							1							1
chr1	2798195	chr1	2798244	49	FALSE	scaffold00011_hap1	2303855	2303856	DEL	1|0							1							1
chr1	2849464	chr1	2849465	820	FALSE	scaffold00011_hap1	2355085	2355905	INS	1|1							1							1
chr1	2859543	chr1	2859544	926	FALSE	scaffold00011_hap1	2366003	2366929	INS	1|0	Low_complexity	1	Low_complexity	1	GA-rich	1	1	Low_complexity	1	Low_complexity	1	GA-rich	1	1
chr1	2863183	chr1	2863184	48	FALSE	scaffold00011_hap1	2370569	2370617	INS	1|1							1							1
chr1	2877543	chr1	2877544	49	FALSE	scaffold00011_hap1	2384951	2385000	INS	1|1							1							1
chr1	2921589	chr1	2921590	42	FALSE	scaffold00011_hap1	2429013	2429055	INS	1|1							1							1
chr1	2921644	chr1	2921645	42	FALSE	scaffold00011_hap1	2429110	2429152	INS	1|1							1							1
chr1	2949816	chr1	2949817	49	FALSE	scaffold00011_hap1	2457359	2457408	INS	1|1							1							1
chr1	2974675	chr1	2974719	44	FALSE	scaffold00011_hap1	2482251	2482252	DEL	1|0							1							1
chr1	2976585	chr1	2976849	264	FALSE	scaffold00011_hap1	2484117	2484118	DEL	1|1							1							1
chr1	2977436	chr1	2977437	39	FALSE	scaffold00011_hap1	2484704	2484743	INS	1|1							1							1
chr1	2980993	chr1	2980994	75	FALSE	scaffold00011_hap1	2488281	2488356	INS	1|0							1							1
chr1	3016686	chr1	3016687	570	FALSE	scaffold00011_hap1	2524068	2524638	INS	1|1	Low_complexity	1	Low_complexity	1	G-rich	1	1	Low_complexity	1	Low_complexity	1	GA-rich	1	0.987719
chr1	3026038	chr1	3026039	415	FALSE	scaffold00011_hap1	2533990	2534405	INS	1|1	Simple_repeat	1	Simple_repeat	1	(ATG)n	1	1	Simple_repeat	1	Simple_repeat	1	(ATG)n	1	1
chr1	3111466	chr1	3111467	41	FALSE	scaffold00011_hap1	2619840	2619881	INS	1|1								Low_complexity	1	Low_complexity	1	G-rich	1	1
chr1	3176152	chr1	3176153	239	FALSE	scaffold00011_hap1	2684562	2684801	INS	1|1	Simple_repeat	1	Simple_repeat	1	(CCAT)n	1	1	Simple_repeat	0.891213	Simple_repeat	0.891213	(CCAT)n	0.891213	1
chr1	3181244	chr1	3181245	38	FALSE	scaffold00011_hap1	2689881	2689919	INS	1|1							1							1
chr1	3181333	chr1	3181334	630	FALSE	scaffold00011_hap1	2690008	2690638	INS	1|1							1							1
chr1	3181448	chr1	3181449	216	FALSE	scaffold00011_hap1	2690753	2690969	INS	1|1							1							1
chr1	3181526	chr1	3181527	38	FALSE	scaffold00011_hap1	2691045	2691083	INS	1|1							1							1
chr1	3260742	chr1	3260747	857	FALSE	scaffold00011_hap1	2770298	2771150	INS	1|1	Simple_repeat	1	Simple_repeat	1	(TGA)n	1								0.975352
chr1	3326030	chr1	3326089	59	FALSE	scaffold00011_hap1	2836459	2836460	DEL	1|1							1							1
chr1	3345757	chr1	3345823	66	FALSE	scaffold00011_hap1	2856129	2856130	DEL	1|0							0.984848
chr1	3351524	chr1	3351525	643	FALSE	scaffold00011_hap1	2861836	2862479	INS	1|1	Simple_repeat	1	Simple_repeat	1	(TCTC)n	1	1	Simple_repeat	1	Simple_repeat	1	(CCCT)n	1	1
chr1	3379328	chr1	3379426	98	FALSE	scaffold00011_hap1	2890279	2890280	DEL	1|1							1							1
chr1	3403037	chr1	3403038	31	FALSE	scaffold00011_hap1	2913862	2913893	INS	1|0	Simple_repeat	1	Simple_repeat	1	(CCTCC)n	1	1							1
chr1	3408663	chr1	3408664	168	FALSE	scaffold00011_hap1	2919519	2919687	INS	1|0							1							1
chr1	3433482	chr1	3433521	39	FALSE	scaffold00011_hap1	2944527	2944528	DEL	1|0							1							1
chr1	3443225	chr1	3443262	37	FALSE	scaffold00011_hap1	2954232	2954233	DEL	1|1	L1	0.513514	LINE	0.513514	L1MC1	0.513514	1	L1	1	LINE	1	L1MC2	1	1
chr1	3475042	chr1	3475043	660	FALSE	scaffold00011_hap1	2986008	2986668	INS	1|0	MIR	1	SINE	1	MIR3	1	1							1
chr1	3475102	chr1	3475762	660	FALSE	scaffold00011_hap1	2986728	2986729	DEL	1|0							1	MIR	1	SINE	1	MIR3	1	1
chr1	3477303	chr1	3477304	2005	FALSE	scaffold00011_hap1	2988269	2990274	INS	1|1							1							1
chr1	3502089	chr1	3502113	3135	FALSE	scaffold00011_hap1	3015037	3018196	INS	1|0							1
chr1	3578745	chr1	3578746	91	FALSE	scaffold00011_hap1	3094831	3094922	INS	1|1							1							1
chr1	3583342	chr1	3583343	90	FALSE	scaffold00011_hap1	3099518	3099608	INS	1|0							1							1
chr1	3583558	chr1	3583559	522	FALSE	scaffold00011_hap1	3099824	3100346	INS	1|0							1							1
chr1	3583762	chr1	3583763	191	FALSE	scaffold00011_hap1	3100550	3100741	INS	1|1							1							1
chr1	3583885	chr1	3583886	594	FALSE	scaffold00011_hap1	3100864	3101458	INS	1|0							1							1
chr1	3587857	chr1	3587858	357	FALSE	scaffold00011_hap1	3105430	3105787	INS	1|1							1							1
chr1	3591756	chr1	3591822	66	FALSE	scaffold00011_hap1	3109645	3109646	DEL	1|1							1							1
chr1	3640485	chr1	3640522	37	FALSE	scaffold00011_hap1	3158287	3158288	DEL	1|0							1							1
chr1	3643577	chr1	3643730	153	FALSE	scaffold00011_hap1	3161341	3161342	DEL	1|0							1							1
chr1	3658814	chr1	3658850	36	TRUE	scaffold00011_hap1	3176424	3176425	DEL	1|0	ERV1	0.666667	LTR	0.666667	MER34C2	0.666667	1	ERV1	1	LTR	1	MER34C2	1	1
chr1	3693758	chr1	3693759	70	FALSE	scaffold00011_hap1	3211387	3211457	INS	1|0	Simple_repeat	1	Simple_repeat	1	(GCCTCA)n	1	1	Satellite	1	Satellite	1	MSR1	1	1
chr1	3694168	chr1	3694169	34	FALSE	scaffold00011_hap1	3211866	3211900	INS	1|0							1	Satellite	1	Satellite	1	MSR1	1	1
chr1	3694576	chr1	3694577	248	FALSE	scaffold00011_hap1	3212308	3212556	INS	1|0	Satellite	1	Satellite	1	MSR1	1	1							1
chr1	3694751	chr1	3694752	177	FALSE	scaffold00011_hap1	3212733	3212910	INS	1|0	Satellite	1	Satellite	1	MSR1	1	1							1
chr1	3694857	chr1	3694858	283	FALSE	scaffold00011_hap1	3213016	3213299	INS	1|0							1							1
chr1	3697146	chr1	3697182	36	FALSE	scaffold00011_hap1	3215588	3215589	DEL	1|0							0.916667
chr1	3832468	chr1	3832540	72	FALSE	scaffold00011_hap1	3350774	3350775	DEL	1|0							1							1
chr1	3834252	chr1	3834305	53	FALSE	scaffold00011_hap1	3352485	3352486	DEL	1|0							1							1
chr1	3868664	chr1	3868665	310	FALSE	scaffold00011_hap1	3386869	3387179	INS	1|0	Simple_repeat	1	Simple_repeat	1	(CATAC)n	1	1	Simple_repeat	1	Simple_repeat	1	(CATAC)n	1	1
chr1	3929498	chr1	3929502	292	FALSE	scaffold00011_hap1	3447983	3448271	INS	1|1	Simple_repeat	1	Simple_repeat	1	(AC)n	1	1	Simple_repeat	1	Simple_repeat	1	(AC)n	1	1
chr1	3929774	chr1	3930047	273	TRUE	scaffold00011_hap1	3448547	3448548	DEL	1|0	Simple_repeat	1	Simple_repeat	1	(AC)n	1	1	Simple_repeat	1	Simple_repeat	1	(AC)n	1	1
chr1	3986092	chr1	3986134	42	FALSE	scaffold00011_hap1	3504592	3504593	DEL	1|0	Simple_repeat	1	Simple_repeat	1	(AT)n	1	1	Simple_repeat	1	Simple_repeat	1	(AT)n	1
chr1	3999762	chr1	3999880	118	FALSE	scaffold00011_hap1	3518219	3518220	DEL	1|1							1							1
chr1	4016939	chr1	4016940	190	FALSE	scaffold00011_hap1	3535277	3535467	INS	1|1							1							1
chr1	4077580	chr1	4077581	78	FALSE	scaffold00011_hap1	3596098	3596176	INS	1|1							1							1
chr1	4078477	chr1	4078478	58	FALSE	scaffold00011_hap1	3597053	3597111	INS	1|1							1							1
chr1	4099990	chr1	4099991	81	FALSE	scaffold00011_hap1	3618639	3618720	INS	1|1	Simple_repeat	1	Simple_repeat	1	(TA)n	1	1	Simple_repeat	1	Simple_repeat	1	(TA)n	1	1
chr1	4100191	chr1	4100192	39	FALSE	scaffold00011_hap1	3618955	3618994	INS	1|1	Simple_repeat	1	Simple_repeat	1	(TA)n	1	1	Simple_repeat	1	Simple_repeat	1	(TA)n	1	1
chr1	4129833	chr1	4129834	55	FALSE	scaffold00011_hap1	3648642	3648697	INS	1|0							1							1
chr1	4136718	chr1	4136719	336	FALSE	scaffold00011_hap1	3655582	3655918	INS	1|1							1							1
chr1	4144628	chr1	4144629	1009	FALSE	scaffold00011_hap1	3663831	3664840	INS	1|1	Simple_repeat	1	Simple_repeat	1	(TCA)n	1	1	Simple_repeat	1	Simple_repeat	1	(TCA)n	1	1
chr1	4162720	chr1	4162721	296	FALSE	scaffold00011_hap1	3682953	3683249	INS	1|1
chr1	4228400	chr1	4228401	283	FALSE	scaffold00011_hap1	3748930	3749213	INS	1|0	ERV1	1	LTR	1	MER61B	1		ERV1	1	LTR	1	MER61B	1
chr1	4274167	chr1	4274203	36	FALSE	scaffold00011_hap1	3794981	3794982	DEL	1|1	Simple_repeat	0.777778	Simple_repeat	0.777778	(TCTT)n	0.777778	0.777778	Simple_repeat	1	Simple_repeat	1	(TCTT)n	1	1
chr1	4302954	chr1	4302955	45	FALSE	scaffold00011_hap1	3823741	3823786	INS	1|0	Simple_repeat	1	Simple_repeat	1	(TTCCA)n	1	1	Simple_repeat	1	Simple_repeat	1	(TTCTG)n	1	1
chr1	4331926	chr1	4331927	243	FALSE	scaffold00011_hap1	3852706	3852949	INS	1|0							1							1
chr1	4336501	chr1	4336502	618	FALSE	scaffold00011_hap1	3857529	3858147	INS	1|1							1	Simple_repeat	1	Simple_repeat	1	(ATGATG)n	1	0.886731
chr1	4343489	chr1	4343567	78	FALSE	scaffold00011_hap1	3865132	3865133	DEL	1|0							1							1
chr1	4420279	chr1	4420327	48	FALSE	scaffold00011_hap1	3941847	3941848	DEL	1|1	Simple_repeat	1	Simple_repeat	1	(TA)n	1	1	Simple_repeat	1	Simple_repeat	1	(GT)n	1	1
chr1	4508883	chr1	4508884	40	FALSE	scaffold00011_hap1	4030410	4030450	INS	1|1	Simple_repeat	1	Simple_repeat	1	(TCTTT)n	1	1	Simple_repeat	1	Simple_repeat	1	(TCTTT)n	1	1
chr1	4515098	chr1	4515141	43	FALSE	scaffold00011_hap1	4036671	4036672	DEL	1|1							1							1
chr1	4520723	chr1	4520724	48	FALSE	scaffold00011_hap1	4042277	4042325	INS	1|1							1							1
chr1	4539843	chr1	4539844	35	FALSE	scaffold00011_hap1	4061426	4061461	INS	1|1	Simple_repeat	1	Simple_repeat	1	(TTTAG)n	1	1	Simple_repeat	1	Simple_repeat	1	(TTTAG)n	1	1
chr1	4543681	chr1	4543682	146	FALSE	scaffold00011_hap1	4065301	4065447	INS	1|1	Simple_repeat	1	Simple_repeat	1	(TCTA)n	1	1	Simple_repeat	1	Simple_repeat	1	(TCTA)n	1	1
chr1	4632962	chr1	4632963	101	FALSE	scaffold00011_hap1	4154734	4154835	INS	1|0	Simple_repeat	1	Simple_repeat	1	(CACAGCA)n	1	1	Simple_repeat	1	Simple_repeat	1	(CACAGCA)n	1	1
chr1	4649561	chr1	4649607	46	FALSE	scaffold00011_hap1	4171398	4171399	DEL	1|1							1							1
chr1	4666507	chr1	4666539	32	FALSE	scaffold00011_hap1	4188310	4188311	DEL	1|1							1							1
chr1	4740369	chr1	4740370	167	FALSE	scaffold00011_hap1	4262115	4262282	INS	1|1	L1	1	LINE	1	L1MB3	1		Low_complexity	0.718563	Low_complexity	0.718563	G-rich	0.718563	1
chr1	4939476	chr1	4939477	1855	FALSE	scaffold00011_hap1	4461377	4463232	INS	1|1							1							1
chr1	4969196	chr1	4969197	31	FALSE	scaffold00011_hap1	4492932	4492963	INS	1|1	Low_complexity	1	Low_complexity	1	G-rich	1	1	Low_complexity	1	Low_complexity	1	G-rich	1	1
chr1	5075708	chr1	5075709	72	FALSE	scaffold00011_hap1	4599459	4599531	INS	1|1	Simple_repeat	1	Simple_repeat	1	(TA)n	1	1	Simple_repeat	1	Simple_repeat	1	(TA)n	1	1
chr1	5112425	chr1	5112426	517	FALSE	scaffold00011_hap1	4636261	4636778	INS	1|1	Low_complexity	1	Low_complexity	1	G-rich	1	1							1
chr1	5160273	chr1	5160274	579	FALSE	scaffold00011_hap1	4684627	4685206	INS	1|1	Simple_repeat	1	Simple_repeat	1	(ACACAT)n	1	1	Simple_repeat	1	Simple_repeat	1	(ACACAT)n	1	1
chr1	5199085	chr1	5199130	45	FALSE	scaffold00011_hap1	4724017	4724018	DEL	1|0								ERV1	1	LTR	1	LTR78B	1
chr1	5246172	chr1	5246220	48	FALSE	scaffold00011_hap1	4771065	4771066	DEL	1|1	Simple_repeat	1	Simple_repeat	1	(CTCC)n	1	1	Simple_repeat	1	Simple_repeat	1	(CTCC)n	1	1
chr1	5334544	chr1	5334545	210	FALSE	scaffold00011_hap1	4859398	4859608	INS	1|0							1							1
chr1	5387169	chr1	5387170	5183	FALSE	scaffold00011_hap1	4912230	4917413	INS	1|1	Simple_repeat	1	Simple_repeat	1	(TG)n	1	1
chr1	5404901	chr1	5404902	30	FALSE	scaffold00011_hap1	4935162	4935192	INS	1|0							1							1
chr1	5414152	chr1	5414227	75	FALSE	scaffold00011_hap1	4944440	4944441	DEL	1|0							1							1
chr1	5430411	chr1	5430412	35	FALSE	scaffold00011_hap1	4960627	4960662	INS	1|1							1	ERVL-MaLR	0.914286	LTR	0.914286	MLT1H2	0.914286	1
chr1	5701779	chr1	5701780	32	FALSE	scaffold00011_hap1	5232108	5232140	INS	1|0	Simple_repeat	1	Simple_repeat	1	(AAGA)n	1	1	Simple_repeat	1	Simple_repeat	1	(AGAA)n	1	1
chr1	5713523	chr1	5713524	126	FALSE	scaffold00011_hap1	5243892	5244018	INS	1|0							1							1
chr1	5736364	chr1	5736412	48	FALSE	scaffold00011_hap1	5266845	5266846	DEL	1|1	Simple_repeat	1	Simple_repeat	1	(AGAT)n	1	1	Low_complexity	1	Low_complexity	1	A-rich	1	1
chr1	5744111	chr1	5744231	120	FALSE	scaffold00011_hap1	5274544	5274545	DEL	1|1	Simple_repeat	1	Simple_repeat	1	(TCCC)n	1	1	Simple_repeat	1	Simple_repeat	1	(TCCC)n	1	1
chr1	5802854	chr1	5802855	438	FALSE	scaffold00011_hap1	5333131	5333569	INS	1|1							1	Simple_repeat	1	Simple_repeat	1	(CATCAT)n	1	1
chr1	5829844	chr1	5829845	348	FALSE	scaffold00011_hap1	5360586	5360934	INS	1|1	Simple_repeat	1	Simple_repeat	1	(GATGGT)n	1	1	Simple_repeat	1	Simple_repeat	1	(GATGGT)n	1	1
chr1	5832302	chr1	5832303	736	FALSE	scaffold00011_hap1	5363391	5364127	INS	1|1	Simple_repeat	1	Simple_repeat	1	(GCTGGGG)n	1	1	Simple_repeat	1	Simple_repeat	1	(GGCTGGG)n	1	1
chr1	5977904	chr1	5977906	1315	FALSE	scaffold00011_hap1	5509743	5511056	INS	1|1	Low_complexity	1	Low_complexity	1	GA-rich	1	1	Low_complexity	1	Low_complexity	1	GA-rich	1	1
chr1	6004959	chr1	6005077	118	FALSE	scaffold00011_hap1	5538108	5538109	DEL	1|0							1							1
chr1	6005233	chr1	6005313	80	FALSE	scaffold00011_hap1	5538263	5538264	DEL	1|0							1							1
chr1	6005435	chr1	6005436	41	FALSE	scaffold00011_hap1	5538385	5538426	INS	1|0							1							1
chr1	6006039	chr1	6006618	579	FALSE	scaffold00011_hap1	5539028	5539029	DEL	1|0							1
chr1	6012342	chr1	6012413	71	FALSE	scaffold00011_hap1	5544767	5544768	DEL	1|0	Simple_repeat	1	Simple_repeat	1	(GGAGGT)n	1	1	Simple_repeat	1	Simple_repeat	1	(GGAGGT)n	1	1
chr1	6012493	chr1	6012548	55	FALSE	scaffold00011_hap1	5544849	5544850	DEL	1|0	Simple_repeat	1	Simple_repeat	1	(GGAGGT)n	1	1	Simple_repeat	1	Simple_repeat	1	(GGAGGT)n	1	1
chr1	6025840	chr1	6025874	34	FALSE	scaffold00011_hap1	5558139	5558140	DEL	1|1							1							1
chr1	6107372	chr1	6107415	43	FALSE	scaffold00011_hap1	5639635	5639636	DEL	1|1							1							1
chr1	6107542	chr1	6107543	38	FALSE	scaffold00011_hap1	5639762	5639800	INS	1|1							1							1
chr1	6160073	chr1	6160270	197	TRUE	scaffold00011_hap1	5692342	5692343	DEL	1|0							1							1
chr1	6305285	chr1	6305322	37	FALSE	scaffold00011_hap1	5837367	5837368	DEL	1|0	SVA	1	Retroposon	1	SVA_D	1	1	SVA	1	Retroposon	1	SVA_D	1	1
chr1	6715539	chr1	6715540	40	FALSE	scaffold00011_hap1	6247496	6247536	INS	1|1	SVA	1	Retroposon	1	SVA_D	1	1	SVA	1	Retroposon	1	SVA_D	1	1
chr1	6732544	chr1	6740194	7650	FALSE	scaffold00011_hap1	6264552	6264553	DEL	1|0								Alu	1	SINE	1	AluSx	1
chr1	6742557	chr1	6742558	1751	FALSE	scaffold00011_hap1	6266932	6268683	INS	1|0	Simple_repeat	1	Simple_repeat	1	(TATATA)n	1	1	Simple_repeat	1	Simple_repeat	1	(TA)n	1	1
chr1	6984090	chr1	6984091	204	FALSE	scaffold00011_hap1	6512764	6512968	INS	1|1	Simple_repeat	1	Simple_repeat	1	(ATGG)n	1	1	Simple_repeat	1	Simple_repeat	1	(TGGA)n	1	1
chr1	7139249	chr1	7139250	37	FALSE	scaffold00011_hap1	6668120	6668157	INS	1|1	L1	1	LINE	1	L1ME3C	1	1	Simple_repeat	1	Simple_repeat	1	(TATATA)n	1	1
chr1	7335140	chr1	7335141	37	FALSE	scaffold00011_hap1	6864080	6864117	INS	1|0	Simple_repeat	1	Simple_repeat	1	(G)n	1		Simple_repeat	1	Simple_repeat	1	(TG)n	1	1
chr1	7542557	chr1	7542618	61	TRUE	scaffold00011_hap1	7073195	7073196	DEL	1|0	Alu	1	SINE	1	AluSz6	1	1	Alu	1	SINE	1	AluSx	1	1
chr1	7548462	chr1	7548495	33	FALSE	scaffold00011_hap1	7079045	7079046	DEL	1|0							1							1
chr1	7553216	chr1	7553248	32	FALSE	scaffold00011_hap1	7083764	7083765	DEL	1|0	Simple_repeat	1	Simple_repeat	1	(TGAA)n	1	1							1
chr1	7857143	chr1	7857144	32	FALSE	scaffold00011_hap1	7387641	7387673	INS	1|0	Simple_repeat	1	Simple_repeat	1	(GGAA)n	1	1	Simple_repeat	1	Simple_repeat	1	(GGAA)n	1	1
chr1	7863004	chr1	7863058	54	FALSE	scaffold00011_hap1	7393533	7393534	DEL	1|0	Simple_repeat	1	Simple_repeat	1	(TATTG)n	1	1	Simple_repeat	1	Simple_repeat	1	(TATTG)n	1	1
chr1	7864891	chr1	7865113	222	FALSE	scaffold00011_hap1	7395366	7395367	DEL	1|1							1	ERVL-MaLR	1	LTR	1	MLT1B	1	1
chr1	7865436	chr1	7865491	55	FALSE	scaffold00011_hap1	7395691	7395692	DEL	1|1							1							1
chr1	7903090	chr1	7903091	45	FALSE	scaffold00011_hap1	7433294	7433339	INS	1|0							1							1
chr1	8027004	chr1	8027005	162	FALSE	scaffold00011_hap1	7557249	7557411	INS	1|0							1							1
chr1	8157867	chr1	8157904	37	FALSE	scaffold00011_hap1	7688233	7688234	DEL	1|0	Low_complexity	1	Low_complexity	1	GA-rich	1	1	Low_complexity	1	Low_complexity	1	GA-rich	1	1
chr1	8276902	chr1	8276903	718	FALSE	scaffold00011_hap1	7807232	7807950	INS	1|1	Simple_repeat	1	Simple_repeat	1	(AC)n	1	1	Simple_repeat	1	Simple_repeat	1	(AC)n	1	1
chr1	8322296	chr1	8322297	615	FALSE	scaffold00011_hap1	7853329	7853944	INS	1|0	Simple_repeat	1	Simple_repeat	1	(GATG)n	1	1	Simple_repeat	1	Simple_repeat	1	(GATG)n	1	1
chr1	8322331	chr1	8322332	44	FALSE	scaffold00011_hap1	7853979	7854023	INS	1|0	Simple_repeat	1	Simple_repeat	1	(GATG)n	1	1	Simple_repeat	1	Simple_repeat	1	(GATG)n	1	1
chr1	8331445	chr1	8331446	165	FALSE	scaffold00011_hap1	7863136	7863301	INS	1|1							1							1
chr1	8344892	chr1	8344893	330	FALSE	scaffold00011_hap1	7876752	7877082	INS	1|1							1							1
chr1	8386567	chr1	8386568	320	FALSE	scaffold00011_hap1	7918817	7919137	INS	1|0	L1	1	LINE	1	L1M	1		Alu	0.996875	SINE	0.996875	AluY	0.996875
chr1	8401069	chr1	8401070	30	FALSE	scaffold00011_hap1	7933648	7933678	INS	1|0	Simple_repeat	1	Simple_repeat	1	(AT)n	1	1	Simple_repeat	0.966667	Simple_repeat	0.966667	(AT)n	0.966667	0.966667
chr1	8501472	chr1	8501473	42	FALSE	scaffold00011_hap1	8034106	8034148	INS	1|1	SVA	1	Retroposon	1	SVA_E	1	1	SVA	1	Retroposon	1	SVA_E	1	1
chr1	8501711	chr1	8501712	273	FALSE	scaffold00011_hap1	8034387	8034660	INS	1|0	SVA	1	Retroposon	1	SVA_E	1	1	SVA	1	Retroposon	1	SVA_E	1	1
chr1	8502129	chr1	8502130	367	FALSE	scaffold00011_hap1	8035076	8035443	INS	1|0	SVA	1	Retroposon	1	SVA_E	1	1	SVA	1	Retroposon	1	SVA_E	1	1
chr1	8646055	chr1	8646101	46	FALSE	scaffold00011_hap1	8179383	8179384	DEL	1|1							1
chr1	9053384	chr1	9053385	108	FALSE	scaffold00011_hap1	8586715	8586823	INS	1|1	Simple_repeat	1	Simple_repeat	1	(TA)n	1	1	Simple_repeat	1	Simple_repeat	1	(TA)n	1	1
chr1	9116131	chr1	9116132	103	FALSE	scaffold00011_hap1	8649644	8649747	INS	1|0	hAT-Blackjack	1	DNA	1	MER63D	1		hAT-Blackjack	1	DNA	1	MER63C	1
chr1	9116182	chr1	9116183	235	FALSE	scaffold00011_hap1	8649798	8650033	INS	1|1	Simple_repeat	1	Simple_repeat	1	(TA)n	1	1							1
chr1	9123242	chr1	9123374	132	FALSE	scaffold00011_hap1	8657090	8657091	DEL	1|1	L1	0.719697	LINE	0.719697	L1ME4c	0.719697	1	Simple_repeat	1	Simple_repeat	1	(AT)n	1	1
chr1	9123552	chr1	9123553	43	FALSE	scaffold00011_hap1	8657271	8657314	INS	1|1	L1	1	LINE	1	L1ME4c	1	1	Simple_repeat	1	Simple_repeat	1	(AT)n	1	1
chr1	9129265	chr1	9129266	90	FALSE	scaffold00011_hap1	8663026	8663116	INS	1|1							1							1
chr1	9142897	chr1	9142933	36	FALSE	scaffold00011_hap1	8676754	8676755	DEL	1|0	Simple_repeat	1	Simple_repeat	1	(TTCC)n	1	1	Simple_repeat	1	Simple_repeat	1	(TTCC)n	1	1
chr1	9155323	chr1	9155364	41	FALSE	scaffold00011_hap1	8689140	8689141	DEL	1|0							1							1
chr1	9155446	chr1	9155487	41	FALSE	scaffold00011_hap1	8689222	8689223	DEL	1|0							1							1
chr1	9282514	chr1	9282515	263	FALSE	scaffold00011_hap1	8816240	8816503	INS	1|1	Simple_repeat	1	Simple_repeat	1	(CCT)n	1	1							1
chr1	9310073	chr1	9310074	54	FALSE	scaffold00011_hap1	8844056	8844110	INS	1|1							1							1
chr1	9380255	chr1	9380256	36	FALSE	scaffold00011_hap1	8914292	8914328	INS	1|1	Low_complexity	1	Low_complexity	1	GA-rich	1	1	Simple_repeat	1	Simple_repeat	1	(AAG)n	1	1
chr1	9411293	chr1	9411294	1578	FALSE	scaffold00011_hap1	8945365	8946943	INS	1|1							1							1
chr1	9592641	chr1	9592686	45	FALSE	scaffold00011_hap1	9128302	9128303	DEL	1|1
chr1	9623988	chr1	9623989	6480	FALSE	scaffold00011_hap1	9159613	9166093	INS	1|1	Alu	1	SINE	1	AluSx	1
chr1	9810141	chr1	9810142	139	FALSE	scaffold00011_hap1	9352255	9352394	INS	1|1	Low_complexity	1	Low_complexity	1	GA-rich	1	1	Low_complexity	1	Low_complexity	1	G-rich	1	1
chr1	9968551	chr1	9968552	140	FALSE	scaffold00011_hap1	9510794	9510934	INS	1|1	Alu	1	SINE	1	AluY	1		Alu	0.535714	SINE	0.535714	AluSx	0.535714
chr1	10187621	chr1	10187622	632	FALSE	scaffold00011_hap1	9730005	9730637	INS	1|0	Simple_repeat	1	Simple_repeat	1	(TATATAT)n	1	1	Simple_repeat	1	Simple_repeat	1	(AT)n	1	1
chr1	10187694	chr1	10187695	88	FALSE	scaffold00011_hap1	9730710	9730798	INS	1|1	Simple_repeat	1	Simple_repeat	1	(TATATAT)n	1	1	Simple_repeat	1	Simple_repeat	1	(AT)n	1	1
chr1	10188093	chr1	10188094	250	FALSE	scaffold00011_hap1	9731193	9731443	INS	1|1	Simple_repeat	1	Simple_repeat	1	(TATATAT)n	1	1	Simple_repeat	1	Simple_repeat	1	(AT)n	1	1
chr1	10274719	chr1	10274804	85	FALSE	scaffold00011_hap1	9818045	9818046	DEL	1|0							1	L1	1	LINE	1	L1MC5a	1	1
chr1	10422423	chr1	10423722	1299	FALSE	scaffold00011_hap1	9965676	9965677	DEL	1|0								Alu	1	SINE	1	AluJb	1
chr1	10577554	chr1	10577585	31	FALSE	scaffold00011_hap1	10119537	10119538	DEL	1|1	Alu	0.741935	SINE	0.741935	AluY	0.741935	0.741935	Simple_repeat	1	Simple_repeat	1	(TA)n	1	1
chr1	10744344	chr1	10744345	48	FALSE	scaffold00011_hap1	10286325	10286373	INS	1|1							1							1
chr1	10785135	chr1	10785136	52	FALSE	scaffold00011_hap1	10327170	10327222	INS	1|1	Simple_repeat	1	Simple_repeat	1	(CTTC)n	1	1	Simple_repeat	1	Simple_repeat	1	(CTTC)n	1	1
chr1	10817995	chr1	10817996	32	FALSE	scaffold00011_hap1	10360087	10360119	INS	1|1	Simple_repeat	1	Simple_repeat	1	(TTCC)n	1	1	Simple_repeat	1	Simple_repeat	1	(TTTC)n	1	1
chr1	10824653	chr1	10824684	31	FALSE	scaffold00011_hap1	10366772	10366773	DEL	1|1	Low_complexity	1	Low_complexity	1	A-rich	1	0.967742	Low_complexity	1	Low_complexity	1	GA-rich	1
chr1	10894205	chr1	10896071	1866	FALSE	scaffold00011_hap1	10436306	10436307	DEL	1|0
chr1	10971075	chr1	10971076	1899	FALSE	scaffold00011_hap1	10511303	10513202	INS	1|1	Alu	1	SINE	1	AluJr	1
chr1	11041736	chr1	11041737	274	FALSE	scaffold00011_hap1	10583873	10584147	INS	1|1	Simple_repeat	1	Simple_repeat	1	(GGAT)n	1	1	Simple_repeat	0.551095	Simple_repeat	0.551095	(GGAT)n	0.551095	1
chr1	11069244	chr1	11069245	30	FALSE	scaffold00011_hap1	10611629	10611659	INS	1|1	Simple_repeat	1	Simple_repeat	1	(TG)n	1		Simple_repeat	0.6	Simple_repeat	0.6	(GA)n	0.6	0.6
chr1	11338132	chr1	11338133	352	FALSE	scaffold00011_hap1	10880558	10880910	INS	1|0	Simple_repeat	1	Simple_repeat	1	(CTC)n	1	1	Simple_repeat	1	Simple_repeat	1	(CTC)n	1	1
chr1	11373881	chr1	11373882	1248	FALSE	scaffold00011_hap1	10916667	10917915	INS	1|1	Simple_repeat	1	Simple_repeat	1	(TG)n	1	1	Simple_repeat	1	Simple_repeat	1	(TG)n	1	1
chr1	11431724	chr1	11431725	51	FALSE	scaffold00011_hap1	10975750	10975801	INS	1|0	Simple_repeat	1	Simple_repeat	1	(TTTC)n	1	1	Simple_repeat	1	Simple_repeat	1	(TTTC)n	1	1
chr1	11465148	chr1	11465214	66	FALSE	scaffold00011_hap1	11009225	11009226	DEL	1|0	Low_complexity	0.742424	Low_complexity	0.742424	A-rich	0.742424	1	Simple_repeat	1	Simple_repeat	1	(AAAG)n	1	1
chr1	11522629	chr1	11522630	99	FALSE	scaffold00011_hap1	11066664	11066763	INS	1|1							1							1
chr1	11522716	chr1	11522717	1166	FALSE	scaffold00011_hap1	11066850	11068016	INS	1|1							1							1
chr1	11622836	chr1	11623132	296	FALSE	scaffold00011_hap1	11168166	11168167	DEL	1|1
chr1	11641682	chr1	11641683	37	FALSE	scaffold00011_hap1	11186650	11186687	INS	1|1							1							1
chr1	11751724	chr1	11751762	38	FALSE	scaffold00011_hap1	11296739	11296740	DEL	1|0							1							1
chr1	12395996	chr1	12395997	49	FALSE	scaffold00011_hap1	11941041	11941090	INS	1|0	Simple_repeat	1	Simple_repeat	1	(AT)n	1	1	Simple_repeat	1	Simple_repeat	1	(AT)n	1	1
chr1	12565675	chr1	12565676	734	FALSE	scaffold00011_hap1	12110718	12111452	INS	1|0								Alu	0.997275	SINE	0.997275	AluJb	0.997275
chr1	12816074	chr1	12816354	280	TRUE	scaffold00011_hap1	13144303	13144304	DEL	1|0	L1	0.967857	LINE	0.967857	L1HS	0.967857		L1	1	LINE	1	L1P1	1
chr1	12829732	chr1	12829733	235	TRUE	scaffold00011_hap1	13130662	13130897	INS	1|0	Alu	1	SINE	1	AluSx3	1		Alu	0.608511	SINE	0.608511	AluSx	0.608511
chr1	12830668	chr1	12830717	49	TRUE	scaffold00011_hap1	13129726	13129727	DEL	1|0	Alu	0.755102	SINE	0.755102	AluJb	0.755102		Alu	1	SINE	1	AluSx	1
chr1	12838191	chr1	12838469	278	TRUE	scaffold00011_hap1	13122251	13122252	DEL	1|0	Alu	0.946043	SINE	0.946043	AluYa5	0.946043
chr1	12838204	chr1	12838487	283	TRUE	scaffold00011_hap1	12421339	12421340	DEL	1|0	Alu	0.95053	SINE	0.95053	AluYa5	0.95053
chr1	12839295	chr1	12844704	56	FALSE	scaffold00011_hap1	12422148	12427501	DEL	1|0
chr1	12881888	chr1	12881889	321	FALSE	scaffold00011_hap1	12464632	12464953	INS	1|1								Alu	0.953271	SINE	0.953271	AluYa5	0.953271
chr1	13074641	chr1	13318929	244723	TRUE	contig00803_hap1	53758	54193	INS	1|0								Alu	0.678161	SINE	0.678161	AluSx	0.678161
chr1	13077872	chr1	13279714	167025	TRUE	contig00803_hap1	15718	50535	DEL	1|0
chr1	13318555	chr1	13318671	116	TRUE	contig00803_hap1	54428	54429	DEL	1|0
chr1	13349272	chr1	13349312	40	FALSE	scaffold00011_hap1	13189676	13189677	DEL	1|1	L1	1	LINE	1	L1MC4	1	1	Simple_repeat	1	Simple_repeat	1	(AAAG)n	1	1
chr1	13361096	chr1	13361097	319	FALSE	scaffold00011_hap1	13201482	13201801	INS	1|1	ERVK	1	LTR	1	HERVK-int	1		Alu	0.949843	SINE	0.949843	AluY	0.949843
chr1	13362914	chr1	13362915	106	FALSE	scaffold00011_hap1	13203620	13203726	INS	1|0							1							1
chr1	13363251	chr1	13363252	105	FALSE	scaffold00011_hap1	13204063	13204168	INS	1|1							1							1
chr1	13470159	chr1	13470160	662	FALSE	scaffold00011_hap1	13311087	13311749	INS	1|1	Alu	1	SINE	1	AluSx	1
chr1	13481758	chr1	13481788	30	FALSE	scaffold00011_hap1	13323349	13323350	DEL	1|1	Simple_repeat	0.866667	Simple_repeat	0.866667	(CT)n	0.866667	0.866667	Simple_repeat	1	Simple_repeat	1	(TC)n	1	1
chr1	13567919	chr1	13568051	132	FALSE	scaffold00011_hap1	13409478	13409479	DEL	1|0	ERV1	0.818182	LTR	0.818182	HERVIP10FH-int	0.818182	1	ERV1	1	LTR	1	HERVIP10FH-int	1	1
chr1	13605175	chr1	13605235	60	FALSE	scaffold00011_hap1	13446573	13446574	DEL	1|0							1							1
chr1	13658374	chr1	13658375	126	FALSE	scaffold00011_hap1	13499709	13499835	INS	1|0	SVA	1	Retroposon	1	SVA_D	1	1	SVA	1	Retroposon	1	SVA_D	1	1
chr1	14133379	chr1	14133413	34	FALSE	scaffold00011_hap1	13974941	13974942	DEL	1|0	Simple_repeat	1	Simple_repeat	1	(AAAG)n	1	1	Simple_repeat	1	Simple_repeat	1	(AAAG)n	1	1
chr1	14492665	chr1	14492666	409	FALSE	scaffold00011_hap1	14334146	14334555	INS	1|1	Simple_repeat	1	Simple_repeat	1	(CA)n	1	1	Simple_repeat	1	Simple_repeat	1	(CA)n	1	1
chr1	14492711	chr1	14492712	1014	FALSE	scaffold00011_hap1	14334601	14335615	INS	1|1	Simple_repeat	1	Simple_repeat	1	(CA)n	1	1	Simple_repeat	1	Simple_repeat	1	(CA)n	1	1
chr1	14514329	chr1	14514330	184	FALSE	scaffold00011_hap1	14357215	14357399	INS	1|1	Alu	1	SINE	1	AluY	1		Simple_repeat	0.98913	Simple_repeat	0.98913	(AT)n	0.98913	0.98913
chr1	14514501	chr1	14514502	91	FALSE	scaffold00011_hap1	14357567	14357658	INS	1|1	Simple_repeat	1	Simple_repeat	1	(TA)n	1	1	Simple_repeat	1	Simple_repeat	1	(AT)n	1	1
chr1	14652486	chr1	14652487	416	FALSE	scaffold00011_hap1	14495645	14496061	INS	1|0							1							1
chr1	14873111	chr1	14873165	54	FALSE	scaffold00011_hap1	14716651	14716652	DEL	1|0	Simple_repeat	1	Simple_repeat	1	(TGGA)n	1	1	Simple_repeat	1	Simple_repeat	1	(TGGA)n	1	1
chr1	14918692	chr1	14918727	35	FALSE	scaffold00011_hap1	14762201	14762202	DEL	1|1	Simple_repeat	0.571429	Simple_repeat	0.571429	(AT)n	0.571429	0.571429	Alu	1	SINE	1	AluSx	1
chr1	15036278	chr1	15036279	46	FALSE	scaffold00011_hap1	14879802	14879848	INS	1|0	Simple_repeat	1	Simple_repeat	1	(CCCTG)n	1	1							1
chr1	15050028	chr1	15050083	55	FALSE	scaffold00011_hap1	14893608	14893609	DEL	1|1	Simple_repeat	1	Simple_repeat	1	(AGAGT)n	1	1	Simple_repeat	1	Simple_repeat	1	(TAGAG)n	1	1
chr1	15225218	chr1	15225219	262	FALSE	scaffold00011_hap1	15068735	15068997	INS	1|1	Low_complexity	1	Low_complexity	1	GA-rich	1	1	Low_complexity	1	Low_complexity	1	GA-rich	1	1
chr1	15314646	chr1	15314647	296	FALSE	scaffold00011_hap1	15158450	15158746	INS	1|1	Simple_repeat	1	Simple_repeat	1	(GT)n	1	1	Simple_repeat	1	Simple_repeat	1	(GT)n	1	0.5
chr1	15388296	chr1	15388297	176	FALSE	scaffold00011_hap1	15232370	15232546	INS	1|0	Simple_repeat	1	Simple_repeat	1	(CCTC)n	1	1	Simple_repeat	1	Simple_repeat	1	(CCTC)n	1	1
chr1	15825448	chr1	15828932	3484	FALSE	scaffold00011_hap1	15669707	15669708	DEL	1|0								Alu	1	SINE	1	Alu	1
chr1	16050023	chr1	16050024	79	FALSE	scaffold00011_hap1	15890836	15890915	INS	1|1
chr1	16424205	chr1	16424206	135	FALSE	scaffold00011_hap1	16265122	16265257	INS	1|1	Alu	1	SINE	1	AluYc	1		Alu	1	SINE	1	AluY	1
chr1	16619297	chr1	16621243	1814	FALSE	scaffold00011_hap1	16499250	16499382	DEL	1|1
chr1	16701435	chr1	16701436	38	FALSE	scaffold00011_hap1	16953721	16953759	INS	1|1							1							1
chr1	16736078	chr1	16736079	7322	TRUE	scaffold00011_hap1	16988378	16995700	INS	1|0
chr1	16744515	chr1	16744758	243	TRUE	scaffold00011_hap1	17004164	17004165	DEL	1|0	Alu	1	SINE	1	AluSg	1
chr1	16950220	chr1	16950514	294	TRUE	scaffold00011_hap1	17126538	17126539	DEL	1|0	Alu	0.510204	SINE	0.510204	AluSq	0.510204	1	Alu	1	SINE	1	AluSq2	1
chr1	16951884	chr1	16952142	258	TRUE	scaffold00011_hap1	17127911	17127912	DEL	1|0	Alu	1	SINE	1	AluSg	1		Alu	1	SINE	1	Alu	1
chr1	17166218	chr1	17166219	596	FALSE	scaffold00011_hap1	17358881	17359477	INS	1|0							1							1
chr1	17208572	chr1	17208573	74	FALSE	scaffold00011_hap1	17401815	17401889	INS	1|1							1							1
chr1	17235277	chr1	17235278	36	FALSE	scaffold00011_hap1	17428623	17428659	INS	1|1	Low_complexity	1	Low_complexity	1	G-rich	1	1	Low_complexity	1	Low_complexity	1	G-rich	1	1
chr1	17241451	chr1	17241739	288	FALSE	scaffold00011_hap1	17434833	17434834	DEL	1|0							1							1
chr1	17289303	chr1	17289304	2683	FALSE	scaffold00011_hap1	17482398	17485081	INS	1|1	Alu	1	SINE	1	AluY	1
chr1	17292895	chr1	17292896	88	FALSE	scaffold00011_hap1	17488668	17488756	INS	1|1	L1	1	LINE	1	L1ME3D	1	1	Low_complexity	1	Low_complexity	1	G-rich	1	1
chr1	17351951	chr1	17352005	54	FALSE	scaffold00011_hap1	17547812	17547813	DEL	1|0							1							1
chr1	17358269	chr1	17358591	322	FALSE	scaffold00011_hap1	17554078	17554079	DEL	1|0	Alu	0.950311	SINE	0.950311	AluYe5	0.950311	0.962733
chr1	17437673	chr1	17437674	78	FALSE	scaffold00011_hap1	17633166	17633244	INS	1|1
chr1	17689483	chr1	17689484	715	FALSE	scaffold00011_hap1	17884950	17885665	INS	1|0	Simple_repeat	1	Simple_repeat	1	(TCCT)n	1	1	Simple_repeat	1	Simple_repeat	1	(TCCT)n	1	1
chr1	17859665	chr1	17859666	200	FALSE	scaffold00011_hap1	18055832	18056032	INS	1|1	Low_complexity	1	Low_complexity	1	GA-rich	1	1	Low_complexity	0.99	Low_complexity	0.99	G-rich	0.99	1
chr1	17868629	chr1	17868630	66	FALSE	scaffold00011_hap1	18065026	18065092	INS	1|1	L2	1	LINE	1	L2a	1		TcMar-Mariner	1	DNA	1	MADE1	1
chr1	17897586	chr1	17897587	50	FALSE	scaffold00011_hap1	18094056	18094106	INS	1|0	Simple_repeat	1	Simple_repeat	1	(CTTT)n	1	1	Simple_repeat	1	Simple_repeat	1	(CTTT)n	1	1
chr1	18049637	chr1	18049638	4030	FALSE	scaffold00011_hap1	18246135	18250165	INS	1|0	Simple_repeat	1	Simple_repeat	1	(TGATGG)n	1	1	Simple_repeat	0.523573	Simple_repeat	0.523573	(TGGTGG)n	0.523573
chr1	18049763	chr1	18049764	281	FALSE	scaffold00011_hap1	18250318	18250599	INS	1|0	Simple_repeat	1	Simple_repeat	1	(TGATGG)n	1	1							1
chr1	18049901	chr1	18049902	204	FALSE	scaffold00011_hap1	18250737	18250941	INS	1|0	Simple_repeat	1	Simple_repeat	1	(TGATGG)n	1	1							1
chr1	18208376	chr1	18208377	32	FALSE	scaffold00011_hap1	18409397	18409429	INS	1|1	Simple_repeat	1	Simple_repeat	1	(AT)n	1		Simple_repeat	1	Simple_repeat	1	(AT)n	1	1
chr1	18330584	chr1	18330680	96	FALSE	scaffold00011_hap1	18531677	18531678	DEL	1|0							1							1
chr1	18359397	chr1	18359398	41	FALSE	scaffold00011_hap1	18560397	18560438	INS	1|0	Low_complexity	1	Low_complexity	1	GA-rich	1	1	Low_complexity	1	Low_complexity	1	GA-rich	1	1
chr1	18466059	chr1	18466060	59	FALSE	scaffold00011_hap1	18667137	18667196	INS	1|1														1
chr1	18539889	chr1	18539921	32	FALSE	scaffold00011_hap1	18741032	18741033	DEL	1|1	Simple_repeat	1	Simple_repeat	1	(AAGG)n	1	1	Simple_repeat	1	Simple_repeat	1	(AGGA)n	1	1
chr1	18604993	chr1	18605038	45	FALSE	scaffold00011_hap1	18806126	18806127	DEL	1|0							1							1
chr1	18635511	chr1	18635512	32	FALSE	scaffold00011_hap1	18836579	18836611	INS	1|0	Low_complexity	1	Low_complexity	1	GA-rich	1	1	Simple_repeat	1	Simple_repeat	1	(AAGG)n	1	1
chr1	18825275	chr1	18825541	266	FALSE	scaffold00011_hap1	19026342	19026343	DEL	1|1	Simple_repeat	1	Simple_repeat	1	(CATCAC)n	1	1	Simple_repeat	1	Simple_repeat	1	(CAC)n	1	1
chr1	18925853	chr1	18925854	771	FALSE	scaffold00011_hap1	19126659	19127430	INS	1|1	Simple_repeat	1	Simple_repeat	1	(ATGG)n	1	1	Simple_repeat	1	Simple_repeat	1	(ATGG)n	1	1
chr1	19060138	chr1	19060177	39	TRUE	scaffold00011_hap1	19261710	19261711	DEL	1|0							1							1
chr1	19061417	chr1	19061435	3695	FALSE	scaffold00011_hap1	19262985	19266662	INS	1|0	Simple_repeat	1	Simple_repeat	1	(ACC)n	1	1	Simple_repeat	0.966821	Simple_repeat	0.966821	(CCA)n	0.966821	0.966821
chr1	19471865	chr1	19471896	31	FALSE	scaffold00011_hap1	19677095	19677096	DEL	1|1	Alu	0.967742	SINE	0.967742	AluY	0.967742	1	Alu	1	SINE	1	AluY	1
chr1	19642958	chr1	19643100	142	FALSE	scaffold00011_hap1	19848156	19848157	DEL	1|0							1	L2	1	LINE	1	L2b	1	1
chr1	19802922	chr1	19802923	32	FALSE	scaffold00011_hap1	20007939	20007971	INS	1|1	Simple_repeat	1	Simple_repeat	1	(AT)n	1	1	Simple_repeat	1	Simple_repeat	1	(AT)n	1	1
chr1	19932928	chr1	19932929	319	FALSE	scaffold00011_hap1	20137957	20138276	INS	1|1	Simple_repeat	1	Simple_repeat	1	(ATCATC)n	1	1	Simple_repeat	1	Simple_repeat	1	(ATCATC)n	1	1
chr1	20259100	chr1	20259145	45	FALSE	scaffold00011_hap1	20464468	20464469	DEL	1|0
chr1	20382468	chr1	20382469	437	FALSE	scaffold00011_hap1	20587795	20588232	INS	1|1	Simple_repeat	1	Simple_repeat	1	(TGATGA)n	1		Simple_repeat	1	Simple_repeat	1	(TGATGA)n	1	1
chr1	20463539	chr1	20463540	913	FALSE	scaffold00011_hap1	20669314	20670227	INS	1|1	Simple_repeat	1	Simple_repeat	1	(ATC)n	1	1	Simple_repeat	1	Simple_repeat	1	(ACC)n	1	1
chr1	20587112	chr1	20587170	58	FALSE	scaffold00011_hap1	20793799	20793800	DEL	1|1	Low_complexity	0.534483	Low_complexity	0.534483	G-rich	0.534483
chr1	20605522	chr1	20606197	675	FALSE	scaffold00011_hap1	20812148	20812149	DEL	1|1								Alu	1	SINE	1	AluY	1
chr1	20623746	chr1	20623747	1264	FALSE	scaffold00011_hap1	20829711	20830975	INS	1|0	Alu	1	SINE	1	AluSp	1								0.505538
chr1	20626009	chr1	20626081	72	FALSE	scaffold00011_hap1	20833239	20833240	DEL	1|0	Simple_repeat	1	Simple_repeat	1	(GGAA)n	1	1	Simple_repeat	1	Simple_repeat	1	(AGGA)n	1	1
chr1	20841857	chr1	20841858	42	FALSE	scaffold00011_hap1	21049023	21049065	INS	1|0							1							1
chr1	20981555	chr1	20981617	62	FALSE	scaffold00011_hap1	21188726	21188727	DEL	1|0	Simple_repeat	1	Simple_repeat	1	(TATA)n	1	1	L1	1	LINE	1	L1MC4	1	1
chr1	20989056	chr1	20989057	59	FALSE	scaffold00011_hap1	21196163	21196222	INS	1|0	Simple_repeat	1	Simple_repeat	1	(GAGAG)n	1	1	Low_complexity	1	Low_complexity	1	G-rich	1	1
chr1	21180071	chr1	21180072	243	FALSE	scaffold00011_hap1	21387257	21387500	INS	1|1	Simple_repeat	1	Simple_repeat	1	(ATATATA)n	1	1	Simple_repeat	1	Simple_repeat	1	(ATATATA)n	1	1
chr1	21386965	chr1	21386966	264	FALSE	scaffold00011_hap1	21594346	21594610	INS	1|0	Simple_repeat	1	Simple_repeat	1	(CCTCTC)n	1	1	Simple_repeat	1	Simple_repeat	1	(CCTCTC)n	1	1
chr1	21388194	chr1	21388243	49	FALSE	scaffold00011_hap1	21595848	21595849	DEL	1|0	SVA	1	Retroposon	1	SVA_F	1	1	SVA	1	Retroposon	1	SVA_F	1	1
chr1	21388448	chr1	21388526	78	FALSE	scaffold00011_hap1	21596053	21596054	DEL	1|1	SVA	1	Retroposon	1	SVA_F	1	1	SVA	1	Retroposon	1	SVA_F	1	1
chr1	21388575	chr1	21388747	172	FALSE	scaffold00011_hap1	21596101	21596102	DEL	1|1	SVA	0.593023	Retroposon	0.593023	SVA_F	0.593023	1	SVA	1	Retroposon	1	SVA_F	1	1
chr1	21389073	chr1	21389194	121	FALSE	scaffold00011_hap1	21596426	21596427	DEL	1|0	SVA	1	Retroposon	1	SVA_F	1	1	SVA	1	Retroposon	1	SVA_F	1	1
chr1	21418529	chr1	21418530	39	FALSE	scaffold00011_hap1	21625770	21625809	INS	1|1	Simple_repeat	1	Simple_repeat	1	(TATGTA)n	1	1	Simple_repeat	1	Simple_repeat	1	(TATGTA)n	1	1
chr1	21459925	chr1	21460197	272	FALSE	scaffold00011_hap1	21667224	21667225	DEL	1|1
chr1	21461252	chr1	21461316	64	FALSE	scaffold00011_hap1	21668279	21668280	DEL	1|1	L1	1	LINE	1	L1ME3	1		L1	1	LINE	1	L1ME3	1
chr1	21576215	chr1	21576216	43	FALSE	scaffold00011_hap1	21783214	21783257	INS	1|0	Simple_repeat	1	Simple_repeat	1	(GGAT)n	1	1	Simple_repeat	1	Simple_repeat	1	(GGAT)n	1	1
chr1	21818006	chr1	21818141	135	FALSE	scaffold00011_hap1	22024952	22024953	DEL	1|1	Alu	1	SINE	1	AluSz	1	1	Alu	1	SINE	1	AluSx	1
chr1	21981718	chr1	22006357	23162	FALSE	scaffold00011_hap1	22188538	22190015	DEL	1|0
chr1	22007846	chr1	22007847	311	TRUE	scaffold00011_hap1	22191495	22191806	INS	1|0
chr1	22009083	chr1	22009388	305	TRUE	scaffold00011_hap1	22193052	22193053	DEL	1|0	Alu	1	SINE	1	AluY	1
chr1	22578038	chr1	22578039	1283	FALSE	scaffold00011_hap1	22761554	22762837	INS	1|1							1							1
chr1	22599637	chr1	22599734	97	FALSE	scaffold00011_hap1	22784417	22784418	DEL	1|0	Low_complexity	1	Low_complexity	1	GA-rich	1	1	Low_complexity	1	Low_complexity	1	GA-rich	1	1
chr1	22754841	chr1	22754842	608	FALSE	scaffold00011_hap1	22939532	22940140	INS	1|0							1							1
chr1	22754933	chr1	22754934	42	FALSE	scaffold00011_hap1	22940232	22940274	INS	1|1							1							1
chr1	22950447	chr1	22950448	256	FALSE	scaffold00011_hap1	23135721	23135977	INS	1|1	Alu	1	SINE	1	AluJo	1		Alu	0.59375	SINE	0.59375	AluJo	0.59375
chr1	23277272	chr1	23277273	7473	FALSE	scaffold00011_hap1	23462728	23470201	INS	1|1	Alu	1	SINE	1	AluSx	1
chr1	23392390	chr1	23392391	484	FALSE	scaffold00011_hap1	23585346	23585830	INS	1|1	Simple_repeat	1	Simple_repeat	1	(AC)n	1	1	Simple_repeat	1	Simple_repeat	1	(AC)n	1	1
chr1	23392445	chr1	23392446	871	FALSE	scaffold00011_hap1	23585882	23586753	INS	1|1	Simple_repeat	1	Simple_repeat	1	(AC)n	1	1	Simple_repeat	1	Simple_repeat	1	(AC)n	1	1
chr1	23495229	chr1	23495230	64	FALSE	scaffold00011_hap1	23689515	23689579	INS	1|1	MIR	1	SINE	1	MIRb	1								1
chr1	23504414	chr1	23504415	32	FALSE	scaffold00011_hap1	23698782	23698814	INS	1|0	SVA	1	Retroposon	1	SVA_D	1	1	SVA	1	Retroposon	1	SVA_D	1	1
chr1	23703702	chr1	23703743	41	FALSE	scaffold00011_hap1	23898145	23898146	DEL	1|0							1							1
chr1	23710865	chr1	23710866	96	FALSE	scaffold00011_hap1	23905280	23905376	INS	1|1							1							1
chr1	23837488	chr1	23837489	112	FALSE	scaffold00011_hap1	24031982	24032094	INS	1|1	ERV1	1	LTR	1	LTR1A2	1	1	ERV1	0.5	LTR	0.5	LTR1A2	0.5	1
chr1	23884345	chr1	23884346	2151	FALSE	scaffold00011_hap1	24078983	24081134	INS	1|1	Alu	1	SINE	1	AluSz6	1
chr1	23899810	chr1	23899811	211	FALSE	scaffold00011_hap1	24096565	24096776	INS	1|1	Alu	1	SINE	1	AluSz	1	1	Simple_repeat	0.867299	Simple_repeat	0.867299	(AAAG)n	0.867299	1
chr1	23899892	chr1	23899956	64	FALSE	scaffold00011_hap1	24096858	24096859	DEL	1|1	Simple_repeat	1	Simple_repeat	1	(AAAG)n	1	1	Simple_repeat	1	Simple_repeat	1	(AAAG)n	1	1
chr1	23935785	chr1	23935834	49	FALSE	scaffold00011_hap1	24132718	24132719	DEL	1|1	SVA	1	Retroposon	1	SVA_D	1	1	SVA	1	Retroposon	1	SVA_A	1	1
chr1	23993491	chr1	23993863	372	FALSE	scaffold00011_hap1	24190366	24190367	DEL	1|1	SVA	1	Retroposon	1	SVA_F	1	1	SVA	1	Retroposon	1	SVA_F	1	1
chr1	24011012	chr1	24011013	142	FALSE	scaffold00011_hap1	24207523	24207665	INS	1|1	Simple_repeat	1	Simple_repeat	1	(TCTCC)n	1	1	Simple_repeat	1	Simple_repeat	1	(TCTCC)n	1	1
chr1	24162736	chr1	24162778	42	FALSE	scaffold00011_hap1	24359377	24359378	DEL	1|0	Simple_repeat	1	Simple_repeat	1	(TTTC)n	1	1	Simple_repeat	1	Simple_repeat	1	(TTTC)n	1	1
chr1	24212020	chr1	24212080	60	FALSE	scaffold00011_hap1	24408594	24408595	DEL	1|1							1							1
chr1	24212324	chr1	24212325	342	FALSE	scaffold00011_hap1	24408838	24409180	INS	1|0							1							1
chr1	24212450	chr1	24212451	157	FALSE	scaffold00011_hap1	24409306	24409463	INS	1|0							1							1
chr1	24345043	chr1	24345044	132	FALSE	scaffold00011_hap1	24542088	24542220	INS	1|1							1							1
chr1	24345181	chr1	24345182	251	FALSE	scaffold00011_hap1	24542358	24542609	INS	1|0							1							1
chr1	24730348	chr1	24730349	306	FALSE	scaffold00011_hap1	24927763	24928069	INS	1|1	Simple_repeat	1	Simple_repeat	1	(GGGGGA)n	1	1	Low_complexity	1	Low_complexity	1	G-rich	1	1
chr1	24799916	chr1	24800211	295	FALSE	scaffold00011_hap1	24997580	24997581	DEL	1|1	SVA	0.522034	Retroposon	0.522034	SVA_F	0.522034	1	SVA	1	Retroposon	1	SVA_F	1	1
chr1	24832196	chr1	24835018	2822	FALSE	scaffold00011_hap1	25029568	25029569	DEL	1|1	SVA	0.916371	Retroposon	0.916371	SVA_E	0.916371		Simple_repeat	1	Simple_repeat	1	(TTTATTT)n	1
chr1	25044975	chr1	25044976	116	FALSE	scaffold00011_hap1	25239513	25239629	INS	1|1	Low_complexity	1	Low_complexity	1	GA-rich	1	1	Low_complexity	1	Low_complexity	1	GA-rich	1	1
chr1	25054265	chr1	25054266	323	FALSE	scaffold00011_hap1	25248917	25249240	INS	1|1	Simple_repeat	1	Simple_repeat	1	(TCCT)n	1	1	Simple_repeat	1	Simple_repeat	1	(TCCT)n	1	1
chr1	25108872	chr1	25108873	68	FALSE	scaffold00011_hap1	25303847	25303915	INS	1|0	Low_complexity	1	Low_complexity	1	GA-rich	1	1	Low_complexity	1	Low_complexity	1	GA-rich	1	0.529412
chr1	25258881	chr1	25386848	94283	FALSE	scaffold00011_hap1	25453906	25548189	INV	1|0
chr1	25331734	chr1	25331907	173	FALSE	scaffold00011_hap1	25484436	25484437	DEL	1|0	Alu	1	SINE	1	AluY	1	0.965318
chr1	25391161	chr1	25391813	652	TRUE	scaffold00011_hap1	25514879	25514880	DEL	1|0
chr1	25393070	chr1	25393358	288	TRUE	scaffold00011_hap1	25516122	25516123	DEL	1|0	L2	0.715278	LINE	0.715278	L2a	0.715278		hAT-Charlie	1	DNA	1	Charlie20a	1
chr1	25410272	chr1	25410273	104	FALSE	scaffold00011_hap1	25533013	25533117	INS	1|0
chr1	25529499	chr1	25529500	967	FALSE	scaffold00011_hap1	25652332	25653299	INS	1|1	Simple_repeat	1	Simple_repeat	1	(GT)n	1		Simple_repeat	1	Simple_repeat	1	(GT)n	1	0.98242
chr1	25751258	chr1	25751259	58	FALSE	scaffold00011_hap1	25875051	25875109	INS	1|1	Simple_repeat	1	Simple_repeat	1	(TTCC)n	1	1	Simple_repeat	1	Simple_repeat	1	(TTCC)n	1	1
chr1	25768267	chr1	25768268	95	FALSE	scaffold00011_hap1	25892105	25892200	INS	1|1	Simple_repeat	1	Simple_repeat	1	(CA)n	1	1	Simple_repeat	1	Simple_repeat	1	(CA)n	1	1
chr1	25808297	chr1	25808342	45	FALSE	scaffold00011_hap1	25932233	25932234	DEL	1|1	Simple_repeat	1	Simple_repeat	1	(CTGGC)n	1	1	Simple_repeat	1	Simple_repeat	1	(CTGGC)n	1	1
chr1	26163321	chr1	26163647	326	FALSE	scaffold00011_hap1	26287177	26287178	DEL	1|0	Alu	0.953988	SINE	0.953988	AluYa5	0.953988		L2	1	LINE	1	L2b	1
chr1	26206481	chr1	26206482	56	FALSE	scaffold00011_hap1	26330008	26330064	INS	1|1	Simple_repeat	1	Simple_repeat	1	(AAAG)n	1	1	Simple_repeat	1	Simple_repeat	1	(AAAG)n	1	1
chr1	26345014	chr1	26345065	51	FALSE	scaffold00011_hap1	26468595	26468596	DEL	1|1							1							1
chr1	26399719	chr1	26399720	44	FALSE	scaffold00011_hap1	26523276	26523320	INS	1|1	Simple_repeat	1	Simple_repeat	1	(AT)n	1	1	Simple_repeat	1	Simple_repeat	1	(AT)n	1	1
chr1	26399819	chr1	26399820	526	FALSE	scaffold00011_hap1	26523421	26523947	INS	1|1	Simple_repeat	1	Simple_repeat	1	(AT)n	1	1	Simple_repeat	1	Simple_repeat	1	(AT)n	1	1
chr1	26414206	chr1	26414244	38	FALSE	scaffold00011_hap1	26538338	26538339	DEL	1|0
chr1	26488468	chr1	26488504	36	FALSE	scaffold00011_hap1	26612542	26612543	DEL	1|1	Simple_repeat	1	Simple_repeat	1	(TA)n	1	1	Simple_repeat	1	Simple_repeat	1	(AT)n	1	1
chr1	26512370	chr1	26512371	30	FALSE	scaffold00011_hap1	26636399	26636429	INS	1|1	Simple_repeat	1	Simple_repeat	1	(AC)n	1	1	Simple_repeat	1	Simple_repeat	1	(AC)n	1	1
chr1	26596577	chr1	26596624	47	FALSE	scaffold00011_hap1	26720645	26720646	DEL	1|0	SVA	1	Retroposon	1	SVA_D	1	1	SVA	1	Retroposon	1	SVA_D	1	1
chr1	26639323	chr1	26648755	9427	FALSE	scaffold00011_hap1	26763363	26772790	INV	1|1
chr1	26818636	chr1	26818637	98	FALSE	scaffold00011_hap1	26942681	26942779	INS	1|1	SVA	1	Retroposon	1	SVA_F	1	1	SVA	1	Retroposon	1	SVA_F	1	1
chr1	26904040	chr1	26904041	325	FALSE	scaffold00011_hap1	27028176	27028501	INS	1|0	Simple_repeat	1	Simple_repeat	1	(AAAT)n	1	1	Simple_repeat	1	Simple_repeat	1	(AAAT)n	1	1
chr1	27030486	chr1	27030487	720	FALSE	scaffold00011_hap1	27154947	27155667	INS	1|1	Alu	1	SINE	1	AluSq2	1	1
chr1	27086495	chr1	27086496	1170	FALSE	scaffold00011_hap1	27211695	27212865	INS	1|1	Simple_repeat	1	Simple_repeat	1	(CA)n	1	1	Simple_repeat	1	Simple_repeat	1	(CA)n	1	1
chr1	27107220	chr1	27107221	1197	FALSE	scaffold00011_hap1	27233589	27234786	INS	1|1	Simple_repeat	1	Simple_repeat	1	(CA)n	1	1	Simple_repeat	1	Simple_repeat	1	(CA)n	1	1
chr1	27668986	chr1	27669022	36	FALSE	scaffold00011_hap1	27796628	27796629	DEL	1|1							1							1
chr1	27853406	chr1	27853977	571	FALSE	scaffold00011_hap1	27981022	27981023	DEL	1|1	SVA	1	Retroposon	1	SVA_F	1	1	SVA	1	Retroposon	1	SVA_F	1	1
chr1	27878460	chr1	27878461	1381	FALSE	scaffold00011_hap1	28005513	28006894	INS	1|1	Alu	1	SINE	1	AluJo	1
chr1	27905878	chr1	27905879	125	FALSE	scaffold00011_hap1	28034303	28034428	INS	1|1	Alu	1	SINE	1	AluYi6_4d	1
chr1	27916762	chr1	27916763	84	FALSE	scaffold00011_hap1	28045299	28045383	INS	1|1	Simple_repeat	1	Simple_repeat	1	(TCCT)n	1	1	Simple_repeat	1	Simple_repeat	1	(CCT)n	1	1
chr1	27916996	chr1	27917027	31	FALSE	scaffold00011_hap1	28045613	28045614	DEL	1|0	Simple_repeat	1	Simple_repeat	1	(TCCT)n	1	1	Simple_repeat	1	Simple_repeat	1	(CCT)n	1	1
chr1	28410142	chr1	28410143	131	FALSE	scaffold00011_hap1	28538751	28538882	INS	1|0	Alu	1	SINE	1	AluSx3	1		Alu	1	SINE	1	AluSx3	1
chr1	28935438	chr1	28935439	34	FALSE	scaffold00011_hap1	29064156	29064190	INS	1|1	Simple_repeat	1	Simple_repeat	1	(AC)n	1	1	Simple_repeat	1	Simple_repeat	1	(AC)n	1	1
chr1	29100313	chr1	29100314	330	FALSE	scaffold00011_hap1	29229108	29229438	INS	1|1	Alu	1	SINE	1	AluSp	1		Alu	0.942424	SINE	0.942424	AluYg6	0.942424
chr1	29518740	chr1	29518741	52	FALSE	scaffold00011_hap1	29647891	29647943	INS	1|1	Simple_repeat	1	Simple_repeat	1	(CTT)n	1	1	Simple_repeat	1	Simple_repeat	1	(CTT)n	1	1
chr1	29723573	chr1	29723574	180	FALSE	scaffold00011_hap1	29852728	29852908	INS	1|0							1							1
chr1	29723864	chr1	29723865	378	FALSE	scaffold00011_hap1	29853199	29853577	INS	1|1							1							1
chr1	29727240	chr1	29727241	306	FALSE	scaffold00011_hap1	29856953	29857259	INS	1|0							1							1
chr1	29727327	chr1	29727328	84	FALSE	scaffold00011_hap1	29857346	29857430	INS	1|0							1							1
chr1	29771077	chr1	29771078	31	FALSE	scaffold00011_hap1	29901231	29901262	INS	1|0	L1	1	LINE	1	L1ME4a	1	1							1
chr1	29771311	chr1	29771312	522	FALSE	scaffold00011_hap1	29901493	29902015	INS	1|1	Simple_repeat	1	Simple_repeat	1	(ATAC)n	1	1							1
chr1	29771567	chr1	29771568	68	FALSE	scaffold00011_hap1	29902269	29902337	INS	1|0	Simple_repeat	1	Simple_repeat	1	(ATAC)n	1	1							1
chr1	29771713	chr1	29771714	35	FALSE	scaffold00011_hap1	29902489	29902524	INS	1|1	Simple_repeat	1	Simple_repeat	1	(ATAC)n	1	1							1
chr1	29873200	chr1	29873201	374	FALSE	scaffold00011_hap1	30004018	30004392	INS	1|0	L1	1	LINE	1	L1MDb	1		L1	1	LINE	1	L1MDa	1
chr1	30096601	chr1	30096602	163	FALSE	scaffold00011_hap1	30227747	30227910	INS	1|1
chr1	30301389	chr1	30301390	58	FALSE	scaffold00011_hap1	30432712	30432770	INS	1|1	Low_complexity	1	Low_complexity	1	G-rich	1	1	Low_complexity	1	Low_complexity	1	GA-rich	1	1
chr1	30375772	chr1	30375825	53	FALSE	scaffold00011_hap1	30507220	30507221	DEL	1|0							1							1
chr1	30405713	chr1	30405714	1602	FALSE	scaffold00011_hap1	30537083	30538684	INS	1|0
chr1	30488738	chr1	30488739	92	FALSE	scaffold00011_hap1	30621707	30621799	INS	1|1	Simple_repeat	1	Simple_repeat	1	(TGGTGA)n	1	1	Simple_repeat	1	Simple_repeat	1	(TGA)n	1	1
chr1	30488838	chr1	30488839	112	FALSE	scaffold00011_hap1	30621899	30622011	INS	1|1	Simple_repeat	1	Simple_repeat	1	(TGGTGA)n	1	1	Simple_repeat	1	Simple_repeat	1	(TGA)n	1
chr1	30515558	chr1	30515559	147	FALSE	scaffold00011_hap1	30648745	30648892	INS	1|0	L2	1	LINE	1	L2b	1	1	L2	1	LINE	1	L2b	1
chr1	30651739	chr1	30651740	1284	FALSE	scaffold00011_hap1	30785050	30786334	INS	1|1							1							1
chr1	30655544	chr1	30655545	75	FALSE	scaffold00011_hap1	30790186	30790261	INS	1|0							1							1
chr1	30655634	chr1	30655635	1047	FALSE	scaffold00011_hap1	30790360	30791407	INS	1|0							1							1
chr1	30732368	chr1	30732373	2544	FALSE	scaffold00011_hap1	30868143	30870682	INS	1|1	Simple_repeat	1	Simple_repeat	1	(GT)n	1		Simple_repeat	1	Simple_repeat	1	(GT)n	1
chr1	30771803	chr1	30771897	94	FALSE	scaffold00011_hap1	30910120	30910121	DEL	1|1	Alu	0.787234	SINE	0.787234	AluJb	0.787234	1	Alu	1	SINE	1	AluJr	1
chr1	30773159	chr1	30773196	37	FALSE	scaffold00011_hap1	30911382	30911383	DEL	1|0							1							1
chr1	30972260	chr1	30972311	51	FALSE	scaffold00011_hap1	31110655	31110656	DEL	1|1	Simple_repeat	0.823529	Simple_repeat	0.823529	(AGGGG)n	0.823529	0.823529							1
chr1	31080648	chr1	31080684	36	FALSE	scaffold00011_hap1	31218979	31218980	DEL	1|1	Simple_repeat	0.638889	Simple_repeat	0.638889	(TA)n	0.638889	0.638889	Simple_repeat	1	Simple_repeat	1	(TA)n	1	1
chr1	31345547	chr1	31345548	53	FALSE	scaffold00011_hap1	31483964	31484017	INS	1|1	Simple_repeat	1	Simple_repeat	1	(TA)n	1	1	Simple_repeat	1	Simple_repeat	1	(TA)n	1	1
chr1	31431776	chr1	31432227	6755	FALSE	scaffold00011_hap1	31570992	31577296	INS	1|1	Simple_repeat	1	Simple_repeat	1	(GATAGGGTG)n	1	1	Simple_repeat	1	Simple_repeat	1	(GATAGGGTG)n	1	1
chr1	31431858	chr1	31431859	261	TRUE	scaffold00011_hap1	31577378	31577639	INS	1|0	Simple_repeat	1	Simple_repeat	1	(GATAGGGTG)n	1	1	Simple_repeat	1	Simple_repeat	1	(GATAGGGTG)n	1	1
chr1	31431913	chr1	31431914	279	TRUE	scaffold00011_hap1	31570372	31570651	INS	1|0	Simple_repeat	1	Simple_repeat	1	(GATAGGGTG)n	1	1	Simple_repeat	1	Simple_repeat	1	(GATAGGGTG)n	1	1
chr1	31432102	chr1	31432103	45	TRUE	scaffold00011_hap1	31577883	31577928	INS	1|0	Simple_repeat	1	Simple_repeat	1	(GATAGGGTG)n	1	1	Simple_repeat	1	Simple_repeat	1	(GATAGGGTG)n	1	1
chr1	31495019	chr1	31495020	270	FALSE	scaffold00011_hap1	31640824	31641094	INS	1|1	Simple_repeat	1	Simple_repeat	1	(AT)n	1	1	Simple_repeat	1	Simple_repeat	1	(TA)n	1	1
chr1	31495080	chr1	31495081	153	FALSE	scaffold00011_hap1	31641152	31641305	INS	1|1	Simple_repeat	1	Simple_repeat	1	(AT)n	1	1	Simple_repeat	1	Simple_repeat	1	(TA)n	1	1
chr1	31807403	chr1	31807404	281	FALSE	scaffold00011_hap1	31953601	31953882	INS	1|1	L1	1	LINE	1	L1MEd	1	1	Simple_repeat	1	Simple_repeat	1	(GGGGA)n	1	1
chr1	32539740	chr1	32539741	223	FALSE	scaffold00011_hap1	32686190	32686413	INS	1|1
chr1	32581182	chr1	32581187	607	FALSE	scaffold00011_hap1	32727857	32728459	INS	1|1	Simple_repeat	1	Simple_repeat	1	(TA)n	1	1	Simple_repeat	1	Simple_repeat	1	(TATATTA)n	1	1
chr1	32642777	chr1	32642778	1003	FALSE	scaffold00011_hap1	32790060	32791063	INS	1|1	Alu	1	SINE	1	AluSq2	1	1
chr1	33052503	chr1	33052504	101	FALSE	scaffold00011_hap1	33200788	33200889	INS	1|1	SVA	1	Retroposon	1	SVA_F	1	1	SVA	1	Retroposon	1	SVA_F	1	1
chr1	33186817	chr1	33186818	1695	FALSE	scaffold00011_hap1	33335192	33336887	INS	1|1	Alu	1	SINE	1	AluSx1	1
chr1	33864929	chr1	33864930	220	FALSE	scaffold00011_hap1	34015081	34015301	INS	1|1	Low_complexity	1	Low_complexity	1	GA-rich	1	1							1
chr1	33938387	chr1	33938388	35	FALSE	scaffold00011_hap1	34088773	34088808	INS	1|1							1							1
chr1	33989013	chr1	33989051	38	FALSE	scaffold00011_hap1	34139438	34139439	DEL	1|1	Simple_repeat	1	Simple_repeat	1	(AT)n	1	1	L1	1	LINE	1	L1ME1	1
chr1	34080921	chr1	34080922	32	FALSE	scaffold00011_hap1	34231135	34231167	INS	1|0	Simple_repeat	1	Simple_repeat	1	(GAAA)n	1	1	Simple_repeat	1	Simple_repeat	1	(GAAA)n	1	1
chr1	34541466	chr1	34541467	924	FALSE	scaffold00011_hap1	34691740	34692664	INS	1|1								L1	1	LINE	1	L1MB8	1
chr1	34635820	chr1	34646375	10555	FALSE	scaffold00011_hap1	34787002	34787003	DEL	1|1								ERV1	1	LTR	1	HERVH-int	1
chr1	34777717	chr1	34777718	248	FALSE	scaffold00011_hap1	34918349	34918597	INS	1|1							1							1
chr1	34802227	chr1	34802362	135	FALSE	scaffold00011_hap1	34943102	34943103	DEL	1|1	Simple_repeat	1	Simple_repeat	1	(GGTTT)n	1	1	Simple_repeat	1	Simple_repeat	1	(GGTTC)n	1	1
chr1	34906016	chr1	34906017	34	FALSE	scaffold00011_hap1	35046681	35046715	INS	1|1	Simple_repeat	1	Simple_repeat	1	(TA)n	1		Simple_repeat	1	Simple_repeat	1	(TA)n	1	1
chr1	35156760	chr1	35157133	1129	FALSE	scaffold00011_hap1	35297862	35298618	INS	1|1	Alu	0.815013	SINE	0.815013	AluSq2	0.815013
chr1	35161526	chr1	35161847	321	TRUE	scaffold00011_hap1	35303389	35303390	DEL	1|0	Alu	0.535826	SINE	0.535826	AluY	0.535826	1	Alu	1	SINE	1	AluSc8	1
chr1	35260253	chr1	35260254	314	FALSE	scaffold00011_hap1	35401779	35402093	INS	1|0							1							1
chr1	35576928	chr1	35576962	34	FALSE	scaffold00011_hap1	35718720	35718721	DEL	1|1							1							1
chr1	36126530	chr1	36126564	34	FALSE	scaffold00011_hap1	36268226	36268227	DEL	1|0	Simple_repeat	1	Simple_repeat	1	(GT)n	1	1	Simple_repeat	1	Simple_repeat	1	(GT)n	1	1
chr1	36210726	chr1	36210727	100	FALSE	scaffold00011_hap1	36352385	36352485	INS	1|1	Simple_repeat	1	Simple_repeat	1	(TA)n	1	1	Simple_repeat	1	Simple_repeat	1	(TA)n	1	1
chr1	36267649	chr1	36267896	247	FALSE	scaffold00011_hap1	36409381	36409382	DEL	1|1
chr1	36283616	chr1	36283668	52	FALSE	scaffold00011_hap1	36425103	36425104	DEL	1|1							1
chr1	36688488	chr1	36688489	307	FALSE	scaffold00011_hap1	36829992	36830299	INS	1|1							1							1
chr1	36740614	chr1	36740694	80	FALSE	scaffold00011_hap1	36882417	36882418	DEL	1|1							1
chr1	36750194	chr1	36750195	340	FALSE	scaffold00011_hap1	36891918	36892258	INS	1|1								Alu	0.929412	SINE	0.929412	AluYb8	0.929412
chr1	36793822	chr1	36793823	780	FALSE	scaffold00011_hap1	36935885	36936665	INS	1|1	Simple_repeat	1	Simple_repeat	1	(TGGA)n	1	1	Simple_repeat	1	Simple_repeat	1	(ATGG)n	1	1
chr1	36957454	chr1	36957455	282	FALSE	scaffold00011_hap1	37100287	37100569	INS	1|1							1							1
chr1	36958604	chr1	36960147	1543	FALSE	scaffold00011_hap1	37101719	37101720	DEL	1|1							1							1
chr1	37102932	chr1	37102933	126	FALSE	scaffold00011_hap1	37244538	37244664	INS	1|1	Low_complexity	1	Low_complexity	1	GA-rich	1	1	Low_complexity	1	Low_complexity	1	GA-rich	1	1
chr1	37128264	chr1	37128265	186	FALSE	scaffold00011_hap1	37270008	37270194	INS	1|1							1							1
chr1	37168247	chr1	37168248	47	FALSE	scaffold00011_hap1	37310195	37310242	INS	1|0	Simple_repeat	1	Simple_repeat	1	(AT)n	1	1	Simple_repeat	1	Simple_repeat	1	(AT)n	1	1
chr1	37288392	chr1	37288422	30	FALSE	scaffold00011_hap1	37430383	37430384	DEL	1|1							1	L2	1	LINE	1	L2c	1
chr1	37335458	chr1	37335459	64	FALSE	scaffold00011_hap1	37477427	37477491	INS	1|0	Simple_repeat	1	Simple_repeat	1	(AT)n	1	1	Simple_repeat	1	Simple_repeat	1	(AT)n	1	1
chr1	37446180	chr1	37446181	677	FALSE	scaffold00011_hap1	37588225	37588902	INS	1|1							1							1
chr1	37742573	chr1	37742736	163	FALSE	scaffold00011_hap1	37885264	37885265	DEL	1|0	ERVL-MaLR	0.797546	LTR	0.797546	MLT1L	0.797546		ERVL-MaLR	1	LTR	1	MLT1L	1
chr1	37753647	chr1	37753679	32	FALSE	scaffold00011_hap1	37896179	37896180	DEL	1|1							1	Low_complexity	1	Low_complexity	1	G-rich	1	1
chr1	37967099	chr1	37967100	319	FALSE	scaffold00011_hap1	38109614	38109933	INS	1|1	Alu	1	SINE	1	AluSz	1		Alu	0.956113	SINE	0.956113	AluY	0.956113
chr1	38485067	chr1	38485068	75	FALSE	scaffold00011_hap1	38627939	38628014	INS	1|1	Alu	1	SINE	1	FLAM_C	1		Alu	1	SINE	1	AluSg	1
chr1	38945846	chr1	38945847	1963	FALSE	scaffold00011_hap1	39088798	39090761	INS	1|1	Alu	1	SINE	1	AluSp	1
chr1	39021181	chr1	39021182	36	FALSE	scaffold00011_hap1	39166058	39166094	INS	1|1	Simple_repeat	1	Simple_repeat	1	(TCCC)n	1	1	Simple_repeat	1	Simple_repeat	1	(TCCC)n	1	1
chr1	39024902	chr1	39024948	46	FALSE	scaffold00011_hap1	39169819	39169820	DEL	1|0	Simple_repeat	1	Simple_repeat	1	(TA)n	1	1
chr1	39044563	chr1	39044564	220	FALSE	scaffold00011_hap1	39189422	39189642	INS	1|1	Low_complexity	1	Low_complexity	1	GA-rich	1	1	Low_complexity	1	Low_complexity	1	GA-rich	1	1
chr1	39234389	chr1	39234390	453	FALSE	scaffold00011_hap1	39379433	39379886	INS	1|1	SVA	1	Retroposon	1	SVA_D	1	1	SVA	1	Retroposon	1	SVA_D	1	0.754967
chr1	39234647	chr1	39234648	52	FALSE	scaffold00011_hap1	39380145	39380197	INS	1|1	SVA	1	Retroposon	1	SVA_D	1	1	SVA	1	Retroposon	1	SVA_D	1	1
chr1	39234818	chr1	39234858	40	FALSE	scaffold00011_hap1	39380368	39380369	DEL	1|1	SVA	1	Retroposon	1	SVA_D	1	1	SVA	1	Retroposon	1	SVA_D	1	1
chr1	39504452	chr1	39504453	459	FALSE	scaffold00011_hap1	39649964	39650423	INS	1|1	ERVK	1	LTR	1	LTR5B	1		ERVK	0.67756	LTR	0.67756	LTR5B	0.67756	1
chr1	39808273	chr1	39808313	40	FALSE	scaffold00011_hap1	39956073	39956074	DEL	1|0	SVA	1	Retroposon	1	SVA_B	1	1	SVA	1	Retroposon	1	SVA_A	1	1
chr1	40050405	chr1	40050406	113	FALSE	scaffold00011_hap1	40198178	40198291	INS	1|1
chr1	40642776	chr1	40642882	106	FALSE	scaffold00011_hap1	40790753	40790754	DEL	1|1	Alu	1	SINE	1	AluSx1	1		Alu	1	SINE	1	AluSx	1
chr1	40685295	chr1	40685332	37	FALSE	scaffold00011_hap1	40833213	40833214	DEL	1|0	Simple_repeat	1	Simple_repeat	1	(AT)n	1	1	ERVL	1	LTR	1	LTR16B2	1	1
chr1	40890118	chr1	40890119	94	FALSE	scaffold00011_hap1	41038008	41038102	INS	1|0	Simple_repeat	1	Simple_repeat	1	(AT)n	1		Simple_repeat	1	Simple_repeat	1	(AT)n	1	1
chr1	41053119	chr1	41053120	33	FALSE	scaffold00011_hap1	41201121	41201154	INS	1|1	Alu	1	SINE	1	AluSg	1		Alu	1	SINE	1	AluSg	1
chr1	41369871	chr1	41369872	54	FALSE	scaffold00011_hap1	41517908	41517962	INS	1|1
chr1	41382200	chr1	41382201	200	FALSE	scaffold00011_hap1	41530288	41530488	INS	1|1	Low_complexity	1	Low_complexity	1	G-rich	1
chr1	41425249	chr1	41425250	482	FALSE	scaffold00011_hap1	41573548	41574030	INS	1|1	Simple_repeat	1	Simple_repeat	1	(TG)n	1	1
chr1	41426281	chr1	41426282	44	FALSE	scaffold00011_hap1	41575061	41575105	INS	1|1							1							1
chr1	41531284	chr1	41531412	128	FALSE	scaffold00011_hap1	41680140	41680141	DEL	1|0							1							1
chr1	41544953	chr1	41544954	408	FALSE	scaffold00011_hap1	41693708	41694116	INS	1|1							1							1
chr1	41561739	chr1	41561740	32	FALSE	scaffold00011_hap1	41710899	41710931	INS	1|1	Alu	1	SINE	1	AluJb	1		Alu	1	SINE	1	AluSx3	1	1
chr1	41638321	chr1	41638360	39	FALSE	scaffold00011_hap1	41787565	41787566	DEL	1|0	Low_complexity	1	Low_complexity	1	GA-rich	1	1	Simple_repeat	1	Simple_repeat	1	(AGAA)n	1	1
chr1	41824772	chr1	41824806	34	FALSE	scaffold00011_hap1	41974028	41974029	DEL	1|0	Simple_repeat	0.647059	Simple_repeat	0.647059	(AG)n	0.647059	0.647059	Simple_repeat	1	Simple_repeat	1	(TA)n	1	1
chr1	42110186	chr1	42110187	85	FALSE	scaffold00011_hap1	42259441	42259526	INS	1|0	Simple_repeat	1	Simple_repeat	1	(AT)n	1	1	L1	0.611765	LINE	0.611765	L1MC4	0.611765
chr1	42277506	chr1	42277821	315	FALSE	scaffold00011_hap1	42426806	42426807	DEL	1|1	Alu	0.971429	SINE	0.971429	AluYa5	0.971429	0.631746	Alu	1	SINE	1	AluY	1
chr1	42324091	chr1	42324092	94	FALSE	scaffold00011_hap1	42473158	42473252	INS	1|1	Simple_repeat	1	Simple_repeat	1	(TA)n	1	1	Simple_repeat	1	Simple_repeat	1	(TA)n	1	1
chr1	42367140	chr1	42367141	36	FALSE	scaffold00011_hap1	42516285	42516321	INS	1|1	Alu	1	SINE	1	AluY	1		Alu	0.555556	SINE	0.555556	AluY	0.555556
chr1	42535699	chr1	42535700	192	FALSE	scaffold00011_hap1	42684758	42684950	INS	1|0	Simple_repeat	1	Simple_repeat	1	(TA)n	1		Simple_repeat	1	Simple_repeat	1	(TA)n	1	1
chr1	43308457	chr1	43308458	42	FALSE	scaffold00011_hap1	43457684	43457726	INS	1|0							1							1
chr1	43594283	chr1	43594284	153	FALSE	scaffold00011_hap1	43743541	43743694	INS	1|0	L2	1	LINE	1	L2c	1		L2	0.601307	LINE	0.601307	L2b	0.601307
chr1	43904942	chr1	43904943	308	FALSE	scaffold00011_hap1	44054347	44054655	INS	1|0							1							1
chr1	43905559	chr1	43905631	72	FALSE	scaffold00011_hap1	44055272	44055273	DEL	1|1							1							1
chr1	43906145	chr1	43906146	36	FALSE	scaffold00011_hap1	44055786	44055822	INS	1|1							1							1
chr1	44613070	chr1	44613071	76	FALSE	scaffold00011_hap1	44762631	44762707	INS	1|1	CR1	1	LINE	1	L3	1	1							1
chr1	44738054	chr1	44738055	45	FALSE	scaffold00011_hap1	44887711	44887756	INS	1|1	SVA	1	Retroposon	1	SVA_B	1		Simple_repeat	1	Simple_repeat	1	(CCCCTC)n	1	1
chr1	44796248	chr1	44796249	52	FALSE	scaffold00011_hap1	44945970	44946022	INS	1|1	Simple_repeat	1	Simple_repeat	1	(ATATATAAAT)n	1	1	Simple_repeat	1	Simple_repeat	1	(ATATATAAAT)n	1	1
chr1	44816569	chr1	44816570	52	FALSE	scaffold00011_hap1	44966322	44966374	INS	1|0							1	L1	1	LINE	1	L1MC4	1	1
chr1	44876573	chr1	44876574	399	FALSE	scaffold00011_hap1	45026397	45026796	INS	1|0	SVA	1	Retroposon	1	SVA_D	1		SVA	1	Retroposon	1	SVA_D	1	0.739348
chr1	44942383	chr1	44942384	53	FALSE	scaffold00011_hap1	45092595	45092648	INS	1|0	Simple_repeat	1	Simple_repeat	1	(TA)n	1	1	Simple_repeat	1	Simple_repeat	1	(TA)n	1	1
chr1	44951954	chr1	44951955	30	FALSE	scaffold00011_hap1	45102226	45102256	INS	1|0	Alu	1	SINE	1	AluYa5	1	1	Alu	1	SINE	1	AluYa5	1	1
chr1	44972260	chr1	44972290	30	FALSE	scaffold00011_hap1	45122572	45122573	DEL	1|0	Simple_repeat	0.966667	Simple_repeat	0.966667	(AC)n	0.966667	1	Simple_repeat	1	Simple_repeat	1	(AC)n	1	1
chr1	45044790	chr1	45044791	42	FALSE	scaffold00011_hap1	45195099	45195141	INS	1|1	Simple_repeat	1	Simple_repeat	1	(AT)n	1	1	Simple_repeat	1	Simple_repeat	1	(AT)n	1	1
chr1	45330022	chr1	45330023	327	FALSE	scaffold00011_hap1	45480384	45480711	INS	1|1	Alu	1	SINE	1	AluSx1	1		Alu	0.95107	SINE	0.95107	AluYb8	0.95107
chr1	45497643	chr1	45497644	429	FALSE	scaffold00011_hap1	45648350	45648779	INS	1|1	SVA	1	Retroposon	1	SVA_D	1		SVA	0.97669	Retroposon	0.97669	SVA_D	0.97669	1
chr1	45497762	chr1	45497763	224	FALSE	scaffold00011_hap1	45648898	45649122	INS	1|1	SVA	1	Retroposon	1	SVA_D	1	1	SVA	1	Retroposon	1	SVA_D	1	1
chr1	45517815	chr1	45517911	96	FALSE	scaffold00011_hap1	45669175	45669176	DEL	1|1
chr1	45703341	chr1	45703342	2816	TRUE	scaffold00011_hap1	45854637	45857453	INS	1|0	Alu	1	SINE	1	AluJb	1
chr1	45710241	chr1	45710951	1601	FALSE	scaffold00011_hap1	45864359	45866670	INS	1|1							1
chr1	45900435	chr1	45900764	329	FALSE	scaffold00011_hap1	46056171	46056172	DEL	1|1	Alu	0.966565	SINE	0.966565	AluYb8	0.966565		L1	1	LINE	1	L1P4	1
chr1	46242260	chr1	46242261	49	FALSE	scaffold00011_hap1	46397683	46397732	INS	1|0	SVA	1	Retroposon	1	SVA_F	1	1	SVA	1	Retroposon	1	SVA_F	1	1
chr1	46776364	chr1	46776365	171	FALSE	scaffold00011_hap1	46931784	46931955	INS	1|1	Simple_repeat	1	Simple_repeat	1	(TA)n	1	1	Simple_repeat	1	Simple_repeat	1	(TA)n	1	1
chr1	47179107	chr1	47179108	108	FALSE	scaffold00011_hap1	47334701	47334809	INS	1|1	Simple_repeat	1	Simple_repeat	1	(TC)n	1	1	Simple_repeat	1	Simple_repeat	1	(TC)n	1	1
chr1	47184459	chr1	47184460	1012	FALSE	scaffold00011_hap1	47340160	47341172	INS	1|1							1							1
chr1	47591404	chr1	47591437	33	FALSE	scaffold00011_hap1	47748128	47748129	DEL	1|1	Simple_repeat	1	Simple_repeat	1	(GT)n	1	1	Simple_repeat	1	Simple_repeat	1	(GT)n	1	1
chr1	47592608	chr1	47592609	65	FALSE	scaffold00011_hap1	47749293	47749358	INS	1|1
chr1	47743225	chr1	47743226	327	FALSE	scaffold00011_hap1	47899935	47900262	INS	1|1	Simple_repeat	1	Simple_repeat	1	(GGTGGT)n	1	1	Simple_repeat	1	Simple_repeat	1	(TGGTGG)n	1	1
chr1	47743457	chr1	47743458	36	FALSE	scaffold00011_hap1	47900494	47900530	INS	1|0	Simple_repeat	1	Simple_repeat	1	(GGTGGT)n	1	1	Simple_repeat	1	Simple_repeat	1	(TGGTGG)n	1	1
chr1	47990769	chr1	47990811	42	FALSE	scaffold00011_hap1	48147843	48147844	DEL	1|0	Simple_repeat	0.952381	Simple_repeat	0.952381	(TA)n	0.952381	0.952381	Simple_repeat	1	Simple_repeat	1	(TA)n	1
chr1	48192952	chr1	48193080	128	FALSE	scaffold00011_hap1	48349984	48349985	DEL	1|0	SVA	1	Retroposon	1	SVA_F	1	1	SVA	1	Retroposon	1	SVA_F	1	1
chr1	48711716	chr1	48711748	32	FALSE	scaffold00011_hap1	48868648	48868649	DEL	1|1	Simple_repeat	1	Simple_repeat	1	(CCCTCT)n	1	1	Simple_repeat	1	Simple_repeat	1	(CCCTCT)n	1
chr1	48980718	chr1	48980750	32	FALSE	scaffold00011_hap1	49137596	49137597	DEL	1|1	Simple_repeat	1	Simple_repeat	1	(AT)n	1	1	Simple_repeat	1	Simple_repeat	1	(AT)n	1	1
chr1	49237512	chr1	49237554	42	FALSE	scaffold00011_hap1	49394365	49394366	DEL	1|0	Simple_repeat	1	Simple_repeat	1	(TA)n	1	1	L1	1	LINE	1	L1MDa	1
chr1	49947949	chr1	49947985	36	FALSE	scaffold00011_hap1	50104710	50104711	DEL	1|0							0.888889							1
chr1	50369313	chr1	50369314	543	FALSE	scaffold00011_hap1	50526039	50526582	INS	1|1	Simple_repeat	1	Simple_repeat	1	(GAT)n	1	1	Simple_repeat	1	Simple_repeat	1	(GAT)n	1	1
chr1	50381601	chr1	50381602	77	FALSE	scaffold00011_hap1	50538846	50538923	INS	1|0	SVA	1	Retroposon	1	SVA_D	1	1	SVA	1	Retroposon	1	SVA_D	1	1
chr1	50381853	chr1	50381854	51	FALSE	scaffold00011_hap1	50539175	50539226	INS	1|0	SVA	1	Retroposon	1	SVA_D	1	1	SVA	1	Retroposon	1	SVA_D	1	1
chr1	50382013	chr1	50382014	164	FALSE	scaffold00011_hap1	50539386	50539550	INS	1|0	SVA	1	Retroposon	1	SVA_D	1	1	SVA	1	Retroposon	1	SVA_D	1	1
chr1	50564278	chr1	50564279	313	FALSE	scaffold00011_hap1	50721817	50722130	INS	1|0								Alu	0.961661	SINE	0.961661	AluY	0.961661
chr1	50819682	chr1	50819730	48	FALSE	scaffold00011_hap1	50977513	50977514	DEL	1|0	Simple_repeat	1	Simple_repeat	1	(TATA)n	1	1	Simple_repeat	1	Simple_repeat	1	(TA)n	1	1
chr1	51711466	chr1	51711467	358	FALSE	scaffold00011_hap1	51869274	51869632	INS	1|1	SVA	1	Retroposon	1	SVA_F	1	1	SVA	1	Retroposon	1	SVA_F	1	1
chr1	51804533	chr1	51804534	84	FALSE	scaffold00011_hap1	51962694	51962778	INS	1|0							1							1
chr1	51852550	chr1	51852556	657	FALSE	scaffold00011_hap1	52010763	52011414	INS	1|0							1							0.921659
chr1	51906876	chr1	51906877	3252	FALSE	scaffold00011_hap1	52065743	52068995	INS	1|1	Low_complexity	1	Low_complexity	1	GA-rich	1	1	Low_complexity	1	Low_complexity	1	G-rich	1	1
chr1	52776229	chr1	52776230	31	FALSE	scaffold00011_hap1	52938308	52938339	INS	1|1	Alu	1	SINE	1	AluSp	1	1	Simple_repeat	0.903226	Simple_repeat	0.903226	(AT)n	0.903226	0.903226
chr1	52869966	chr1	52869967	99	FALSE	scaffold00011_hap1	53032012	53032111	INS	1|1	SVA	1	Retroposon	1	SVA_D	1	1	SVA	1	Retroposon	1	SVA_D	1	1
chr1	52870168	chr1	52870208	40	FALSE	scaffold00011_hap1	53032313	53032314	DEL	1|1	SVA	1	Retroposon	1	SVA_D	1	1	SVA	1	Retroposon	1	SVA_D	1	1
chr1	53099236	chr1	53099237	61	FALSE	scaffold00011_hap1	53261298	53261359	INS	1|1							1							1
chr1	53283422	chr1	53283423	132	FALSE	scaffold00011_hap1	53445608	53445740	INS	1|1							1							1
chr1	53283749	chr1	53283750	936	FALSE	scaffold00011_hap1	53446067	53447003	INS	1|0							1							1
chr1	53525463	chr1	53525464	452	FALSE	scaffold00011_hap1	53688778	53689230	INS	1|1	Simple_repeat	1	Simple_repeat	1	(GGCTGGGGA)n	1	1							1
chr1	53713134	chr1	53713135	350	FALSE	scaffold00011_hap1	53876885	53877235	INS	1|1	Alu	1	SINE	1	AluJb	1	1							1
chr1	54458793	chr1	54458794	168	FALSE	scaffold00011_hap1	54622849	54623017	INS	1|0	Low_complexity	1	Low_complexity	1	GA-rich	1	1	Low_complexity	1	Low_complexity	1	G-rich	1	1
chr1	54458873	chr1	54458874	169	FALSE	scaffold00011_hap1	54623097	54623266	INS	1|0	Low_complexity	1	Low_complexity	1	GA-rich	1	1	Low_complexity	1	Low_complexity	1	G-rich	1	1
chr1	54561778	chr1	54561779	179	FALSE	scaffold00011_hap1	54726112	54726291	INS	1|0	SVA	1	Retroposon	1	SVA_F	1	1	SVA	1	Retroposon	1	SVA_F	1	1
chr1	54808990	chr1	54808991	111	FALSE	scaffold00011_hap1	54973473	54973584	INS	1|1								L2	1	LINE	1	L2b	1
chr1	54819812	chr1	54819813	36	FALSE	scaffold00011_hap1	54984398	54984434	INS	1|0	Simple_repeat	1	Simple_repeat	1	(CTTT)n	1	1	Simple_repeat	1	Simple_repeat	1	(CTTT)n	1	1
chr1	54821878	chr1	54822196	318	FALSE	scaffold00011_hap1	54986491	54986492	DEL	1|0	Alu	0.974843	SINE	0.974843	AluYa5	0.974843		L1	1	LINE	1	L1M2	1
chr1	54921322	chr1	54921360	38	FALSE	scaffold00011_hap1	55085503	55085504	DEL	1|0	Alu	0.894737	SINE	0.894737	AluY	0.894737		Alu	1	SINE	1	AluYk3	1
chr1	54935381	chr1	54935382	35	FALSE	scaffold00011_hap1	55099534	55099569	INS	1|0	Alu	1	SINE	1	FLAM_C	1	1	Alu	0.628571	SINE	0.628571	FLAM_C	0.628571	1
chr1	55003042	chr1	55003043	674	FALSE	scaffold00011_hap1	55167183	55167857	INS	1|1	Simple_repeat	1	Simple_repeat	1	(TGGTGA)n	1	1	Simple_repeat	1	Simple_repeat	1	(TGGTGA)n	1	1
chr1	55240233	chr1	55240234	1608	FALSE	scaffold00011_hap1	55404944	55406552	INS	1|1	Alu	1	SINE	1	AluY	1
chr1	55361866	chr1	55362045	179	FALSE	scaffold00011_hap1	55528253	55528254	DEL	1|0	L1	0.877095	LINE	0.877095	L1ME3Cz	0.877095	1	Alu	1	SINE	1	FLAM_A	1
chr1	55385702	chr1	55385703	127	FALSE	scaffold00011_hap1	55551908	55552035	INS	1|1	Simple_repeat	1	Simple_repeat	1	(CTCC)n	1	1	Simple_repeat	1	Simple_repeat	1	(CTCC)n	1	1
chr1	55398612	chr1	55398646	34	FALSE	scaffold00011_hap1	55564947	55564948	DEL	1|1	Simple_repeat	1	Simple_repeat	1	(AT)n	1	1	Simple_repeat	1	Simple_repeat	1	(AT)n	1	1
chr1	55420705	chr1	55420745	40	FALSE	scaffold00011_hap1	55587016	55587017	DEL	1|1							1
chr1	55509049	chr1	55509103	54	FALSE	scaffold00011_hap1	55675324	55675325	DEL	1|1							1							1
chr1	55662710	chr1	55662764	54	FALSE	scaffold00011_hap1	55828968	55828969	DEL	1|0							1							1
chr1	55663712	chr1	55663808	96	FALSE	scaffold00011_hap1	55829920	55829921	DEL	1|0							1							1
chr1	55665528	chr1	55665624	96	FALSE	scaffold00011_hap1	55831626	55831627	DEL	1|0	Simple_repeat	1	Simple_repeat	1	(TATACG)n	1	1							1
chr1	55666336	chr1	55666337	774	FALSE	scaffold00011_hap1	55832327	55833101	INS	1|1							1							1
chr1	55666784	chr1	55666785	50	FALSE	scaffold00011_hap1	55833557	55833607	INS	1|0	Simple_repeat	1	Simple_repeat	1	(ATACATGT)n	1	1							1
chr1	55667572	chr1	55667602	30	FALSE	scaffold00011_hap1	55834413	55834414	DEL	1|0							1							1
chr1	55935609	chr1	55935930	321	FALSE	scaffold00011_hap1	56102400	56102401	DEL	1|1	Alu	0.965732	SINE	0.965732	AluYa5	0.965732
chr1	56365434	chr1	56369289	3855	FALSE	scaffold00011_hap1	56531907	56531908	DEL	1|1	L1	0.993515	LINE	0.993515	L1HS	0.993515		L1	1	LINE	1	L1MC4	1
chr1	56399194	chr1	56399226	32	FALSE	scaffold00011_hap1	56561837	56561838	DEL	1|1								ERVL-MaLR	1	LTR	1	MLT1O	1
chr1	56422030	chr1	56422347	317	FALSE	scaffold00011_hap1	56584649	56584650	DEL	1|1	Alu	0.987382	SINE	0.987382	AluYa5	0.987382		L1	1	LINE	1	L1MC3	1
chr1	56471096	chr1	56471136	40	FALSE	scaffold00011_hap1	56633399	56633400	DEL	1|0	Simple_repeat	1	Simple_repeat	1	(GAAA)n	1	1	Low_complexity	1	Low_complexity	1	A-rich	1	1
chr1	56530360	chr1	56530361	315	FALSE	scaffold00011_hap1	56692606	56692921	INS	1|0								L2	0.980952	LINE	0.980952	L2	0.980952	1
chr1	56551311	chr1	56551312	50	FALSE	scaffold00011_hap1	56713893	56713943	INS	1|0	Simple_repeat	1	Simple_repeat	1	(GGTTC)n	1	1	Simple_repeat	1	Simple_repeat	1	(TTGGT)n	1	1
chr1	56557000	chr1	56557001	55	FALSE	scaffold00011_hap1	56719635	56719690	INS	1|1	Low_complexity	1	Low_complexity	1	GA-rich	1	1	Low_complexity	1	Low_complexity	1	GA-rich	1	1
chr1	56776934	chr1	56777273	339	FALSE	scaffold00011_hap1	56939636	56939637	DEL	1|1	Alu	0.920354	SINE	0.920354	AluYa5	0.920354		MIR	1	SINE	1	MIRb	1
chr1	57606185	chr1	57606186	211	FALSE	scaffold00011_hap1	57768569	57768780	INS	1|0								Alu	0.971564	SINE	0.971564	AluY	0.971564
chr1	57739434	chr1	57739435	50	FALSE	scaffold00011_hap1	57902113	57902163	INS	1|1	Simple_repeat	1	Simple_repeat	1	(CTCCC)n	1	1	Simple_repeat	1	Simple_repeat	1	(CTCCC)n	1	1
chr1	57951317	chr1	57951318	38	FALSE	scaffold00011_hap1	58114058	58114096	INS	1|1								Simple_repeat	1	Simple_repeat	1	(AT)n	1	1
chr1	58278237	chr1	58279150	913	FALSE	scaffold00011_hap1	58440961	58440962	DEL	1|1								ERVL-MaLR	1	LTR	1	THE1D	1
chr1	58518272	chr1	58518273	43	FALSE	scaffold00011_hap1	58680028	58680071	INS	1|0	Low_complexity	1	Low_complexity	1	GA-rich	1	1	Simple_repeat	1	Simple_repeat	1	(GGAGAGG)n	1	1
chr1	58648562	chr1	58648600	38	FALSE	scaffold00011_hap1	58810333	58810334	DEL	1|0	Simple_repeat	0.552632	Simple_repeat	0.552632	(GA)n	0.552632	0.578947	Simple_repeat	1	Simple_repeat	1	(AC)n	1	1
chr1	58651322	chr1	58651359	37	FALSE	scaffold00011_hap1	58813060	58813061	DEL	1|1								L2	1	LINE	1	L2b	1
chr1	58729589	chr1	58729590	514	FALSE	scaffold00011_hap1	58891340	58891854	INS	1|1	Simple_repeat	1	Simple_repeat	1	(AT)n	1	1	Simple_repeat	1	Simple_repeat	1	(AT)n	1
chr1	58981108	chr1	58981212	104	FALSE	scaffold00011_hap1	59143353	59143354	DEL	1|1	Simple_repeat	1	Simple_repeat	1	(AAAG)n	1	1	Simple_repeat	1	Simple_repeat	1	(AAAG)n	1	1
chr1	59216646	chr1	59216685	39	FALSE	scaffold00011_hap1	59378777	59378778	DEL	1|0	Simple_repeat	0.923077	Simple_repeat	0.923077	(AAAG)n	0.923077	0.923077
chr1	59296653	chr1	59296654	35	FALSE	scaffold00011_hap1	59458729	59458764	INS	1|0							1							1
chr1	59491041	chr1	59491042	59	FALSE	scaffold00011_hap1	59653139	59653198	INS	1|1	Simple_repeat	1	Simple_repeat	1	(CTTC)n	1	1	Simple_repeat	1	Simple_repeat	1	(TTCC)n	1	1
chr1	59800588	chr1	59800589	31	FALSE	scaffold00011_hap1	59962742	59962773	INS	1|0	Simple_repeat	1	Simple_repeat	1	(TCTC)n	1	1	Simple_repeat	1	Simple_repeat	1	(TCTC)n	1	1
chr1	60065003	chr1	60065004	59	FALSE	scaffold00011_hap1	60227182	60227241	INS	1|0	Simple_repeat	1	Simple_repeat	1	(TA)n	1	1	Simple_repeat	1	Simple_repeat	1	(TA)n	1	1
chr1	60085919	chr1	60085920	88	FALSE	scaffold00011_hap1	60248220	60248308	INS	1|1	Simple_repeat	1	Simple_repeat	1	(TA)n	1	1	Simple_repeat	0.693182	Simple_repeat	0.693182	(TA)n	0.693182	1
chr1	60604039	chr1	60604350	311	FALSE	scaffold00011_hap1	60766413	60766414	DEL	1|0	Alu	0.958199	SINE	0.958199	AluYa5	0.958199		L1	1	LINE	1	L1PA7	1
chr1	61393244	chr1	61393245	1904	FALSE	scaffold00011_hap1	61555242	61557146	INS	1|1	Simple_repeat	1	Simple_repeat	1	(CTCTCT)n	1	1
chr1	61647822	chr1	61653831	210	FALSE	scaffold00011_hap1	61811802	61817601	DEL	1|0								Alu	1	SINE	1	AluSp	1
chr1	61871485	chr1	61871486	44	FALSE	scaffold00011_hap1	62035306	62035350	INS	1|1	Simple_repeat	1	Simple_repeat	1	(TA)n	1	1							1
chr1	61924914	chr1	61925263	349	FALSE	scaffold00011_hap1	62088755	62088756	DEL	1|1	Alu	0.856734	SINE	0.856734	AluYc	0.856734		ERV1	1	LTR	1	LTR37-int	1
chr1	62137609	chr1	62137610	378	FALSE	scaffold00011_hap1	62301213	62301591	INS	1|1							1							1
chr1	62189555	chr1	62189586	31	FALSE	scaffold00011_hap1	62353568	62353569	DEL	1|0	Alu	0.580645	SINE	0.580645	FLAM_C	0.580645	1	Alu	1	SINE	1	AluY	1	1
chr1	62349430	chr1	62349592	162	FALSE	scaffold00011_hap1	62513401	62513402	DEL	1|0	Low_complexity	1	Low_complexity	1	GA-rich	1	1	Low_complexity	1	Low_complexity	1	GA-rich	1	1
chr1	62686148	chr1	62686487	339	FALSE	scaffold00011_hap1	62849913	62849914	DEL	1|1	Alu	0.973451	SINE	0.973451	AluYb8	0.973451
chr1	62788864	chr1	62788865	41	FALSE	scaffold00011_hap1	62952221	62952262	INS	1|0	L1	1	LINE	1	L1MC4	1		L1	1	LINE	1	L1MC4	1
chr1	62996288	chr1	62996289	317	FALSE	scaffold00011_hap1	63159671	63159988	INS	1|0
chr1	63046049	chr1	63046050	44	FALSE	scaffold00011_hap1	63209790	63209834	INS	1|0							1	L1	0.772727	LINE	0.772727	L1MC4	0.772727	1
chr1	63053806	chr1	63053807	71	FALSE	scaffold00011_hap1	63217579	63217650	INS	1|0	L1	1	LINE	1	L1MA8	1	1	Simple_repeat	1	Simple_repeat	1	(TTA)n	1	1
chr1	63186740	chr1	63186772	32	FALSE	scaffold00011_hap1	63350616	63350617	DEL	1|0	Simple_repeat	1	Simple_repeat	1	(AAAG)n	1	1	Simple_repeat	1	Simple_repeat	1	(AAAG)n	1	1
chr1	63239685	chr1	63242475	2790	FALSE	scaffold00011_hap1	63403510	63403511	DEL	1|0	L1	0.688172	LINE	0.688172	L1HS	0.688172
chr1	63400241	chr1	63400283	42	FALSE	scaffold00011_hap1	63561211	63561212	DEL	1|1	Simple_repeat	1	Simple_repeat	1	(AT)n	1	1	Simple_repeat	1	Simple_repeat	1	(AT)n	1	1
chr1	63444578	chr1	63444634	56	FALSE	scaffold00011_hap1	63605456	63605457	DEL	1|0	Simple_repeat	1	Simple_repeat	1	(AT)n	1	1	Simple_repeat	1	Simple_repeat	1	(AT)n	1	1
chr1	63473803	chr1	63473990	187	FALSE	scaffold00011_hap1	63634625	63634626	DEL	1|0	SVA	0.59893	Retroposon	0.59893	SVA_F	0.59893	1	SVA	1	Retroposon	1	SVA_E	1	1
chr1	64201499	chr1	64201500	233	FALSE	scaffold00011_hap1	64362010	64362243	INS	1|0	SVA	1	Retroposon	1	SVA_E	1	1	SVA	1	Retroposon	1	SVA_E	1	1
chr1	64239121	chr1	64239178	57	FALSE	scaffold00011_hap1	64399849	64399850	DEL	1|0	Simple_repeat	1	Simple_repeat	1	(AAG)n	1	1	Simple_repeat	1	Simple_repeat	1	(GAA)n	1	1
chr1	64379020	chr1	64379021	74	FALSE	scaffold00011_hap1	64539687	64539761	INS	1|0	ERVL	1	LTR	1	LTR33A	1		ERVL	1	LTR	1	LTR33A	1	1
chr1	64415464	chr1	64415640	176	FALSE	scaffold00011_hap1	64576189	64576190	DEL	1|1	SVA	1	Retroposon	1	SVA_D	1	1	SVA	1	Retroposon	1	SVA_D	1	1
chr1	64492378	chr1	64492379	322	FALSE	scaffold00011_hap1	64652950	64653272	INS	1|1								Alu	0.968944	SINE	0.968944	AluYb8	0.968944
chr1	64734648	chr1	64734745	97	FALSE	scaffold00011_hap1	64895510	64895511	DEL	1|1	ERVL	1	LTR	1	LTR16B1	1	1	ERVL	1	LTR	1	LTR16B1	1
chr1	64878561	chr1	64878591	30	FALSE	scaffold00011_hap1	65039324	65039325	DEL	1|1	Simple_repeat	1	Simple_repeat	1	(TA)n	1	1	hAT-Charlie	1	DNA	1	MER112	1
chr1	65302244	chr1	65302282	38	FALSE	scaffold00011_hap1	65463041	65463042	DEL	1|0	Simple_repeat	1	Simple_repeat	1	(TA)n	1	1	Simple_repeat	1	Simple_repeat	1	(AT)n	1	1
chr1	65362164	chr1	65362165	31	FALSE	scaffold00011_hap1	65522933	65522964	INS	1|0								MIR	1	SINE	1	MIR	1
chr1	65443939	chr1	65444209	270	FALSE	scaffold00011_hap1	65604751	65604752	DEL	1|1	L1	0.937037	LINE	0.937037	L1HS	0.937037		ERV1	1	LTR	1	LTR49	1
chr1	65662113	chr1	65662168	55	FALSE	scaffold00011_hap1	65822673	65822674	DEL	1|0	Simple_repeat	1	Simple_repeat	1	(TTTC)n	1	1	Simple_repeat	1	Simple_repeat	1	(TTTC)n	1	1
chr1	65691088	chr1	65691128	40	FALSE	scaffold00011_hap1	65851563	65851564	DEL	1|0							1							1
chr1	65798226	chr1	65798559	333	FALSE	scaffold00011_hap1	65958594	65958595	DEL	1|0	Alu	0.957958	SINE	0.957958	AluYb8	0.957958		Alu	1	SINE	1	AluSx	1
chr1	66400521	chr1	66400522	60	FALSE	scaffold00011_hap1	66560561	66560621	INS	1|1	Simple_repeat	1	Simple_repeat	1	(AGG)n	1		Simple_repeat	1	Simple_repeat	1	(AGG)n	1	1
chr1	66660038	chr1	66660039	31	FALSE	scaffold00011_hap1	66820020	66820051	INS	1|1	Simple_repeat	1	Simple_repeat	1	(AAAG)n	1	1	Low_complexity	1	Low_complexity	1	A-rich	1	1
chr1	66660119	chr1	66660150	31	FALSE	scaffold00011_hap1	66820132	66820133	DEL	1|1	Simple_repeat	1	Simple_repeat	1	(AAAG)n	1	1	Low_complexity	1	Low_complexity	1	A-rich	1	1
chr1	66735521	chr1	66735853	332	FALSE	scaffold00011_hap1	66895500	66895501	DEL	1|1	Alu	0.948795	SINE	0.948795	AluYb8	0.948795		L1	1	LINE	1	L1MA8	1
chr1	66836190	chr1	66836222	32	FALSE	scaffold00011_hap1	66995834	66995835	DEL	1|0	Simple_repeat	1	Simple_repeat	1	(AAGA)n	1	1	Simple_repeat	1	Simple_repeat	1	(AAGA)n	1	1
chr1	66845189	chr1	66845220	31	FALSE	scaffold00011_hap1	67004787	67004788	DEL	1|0	Alu	0.83871	SINE	0.83871	AluSx1	0.83871	0.967742	Alu	1	SINE	1	AluSq2	1
chr1	66945267	chr1	66945297	30	FALSE	scaffold00011_hap1	67104812	67104813	DEL	1|1	Simple_repeat	1	Simple_repeat	1	(TA)n	1	1	TcMar-Tigger	1	DNA	1	MER2	1
chr1	67159015	chr1	67159016	56	FALSE	scaffold00011_hap1	67318478	67318534	INS	1|0							1							1
chr1	67228009	chr1	67228043	34	FALSE	scaffold00011_hap1	67387535	67387536	DEL	1|1	Simple_repeat	1	Simple_repeat	1	(TCTT)n	1	1	Simple_repeat	1	Simple_repeat	1	(TCTT)n	1	1
chr1	67542275	chr1	67543133	858	FALSE	scaffold00011_hap1	67701786	67701787	DEL	1|1								Alu	1	SINE	1	AluJb	1
chr1	67710026	chr1	67710090	64	FALSE	scaffold00011_hap1	67868686	67868687	DEL	1|0							1							1
chr1	67900432	chr1	67900433	30	FALSE	scaffold00011_hap1	68059010	68059040	INS	1|1	Simple_repeat	1	Simple_repeat	1	(AT)n	1	1	Simple_repeat	1	Simple_repeat	1	(AT)n	1	1
chr1	67930035	chr1	67930036	30	FALSE	scaffold00011_hap1	68088656	68088686	INS	1|1	Simple_repeat	1	Simple_repeat	1	(AAATA)n	1	1	Simple_repeat	1	Simple_repeat	1	(AAATA)n	1	1
chr1	68765062	chr1	68765063	115	FALSE	scaffold00011_hap1	68923702	68923817	INS	1|0	Simple_repeat	1	Simple_repeat	1	(TA)n	1	1
chr1	69341309	chr1	69341628	319	FALSE	scaffold00011_hap1	69500009	69500010	DEL	1|1	Alu	0.962382	SINE	0.962382	AluYa5	0.962382		ERVL-MaLR	1	LTR	1	THE1B	1
chr1	69409181	chr1	69409182	34	FALSE	scaffold00011_hap1	69567580	69567614	INS	1|1	ERV1	1	LTR	1	MER52A	1		ERV1	0.764706	LTR	0.764706	MER52D	0.764706	1
chr1	69465247	chr1	69465248	37	FALSE	scaffold00011_hap1	69623672	69623709	INS	1|1	L1	1	LINE	1	L1PA10	1		L1	1	LINE	1	L1PA10	1
chr1	69478032	chr1	69478338	306	FALSE	scaffold00011_hap1	69636490	69636491	DEL	1|1	Alu	0.970588	SINE	0.970588	AluYa5	0.970588		L1	1	LINE	1	L1ME3A	1
chr1	69561642	chr1	69561999	357	FALSE	scaffold00011_hap1	69719778	69719779	DEL	1|1	Alu	0.893557	SINE	0.893557	AluYb9	0.893557		Alu	1	SINE	1	AluSx4	1
chr1	69625373	chr1	69625374	333	FALSE	scaffold00011_hap1	69783131	69783464	INS	1|0	L1	1	LINE	1	L1ME3B	1		L1	1	LINE	1	L1MEg	1
chr1	69718102	chr1	69718103	43	FALSE	scaffold00011_hap1	69876246	69876289	INS	1|0	L1	1	LINE	1	L1MC4	1	1	Low_complexity	1	Low_complexity	1	A-rich	1	1
chr1	69916099	chr1	69916100	98	FALSE	scaffold00011_hap1	70074306	70074404	INS	1|0	Simple_repeat	1	Simple_repeat	1	(TA)n	1	1	Simple_repeat	1	Simple_repeat	1	(TA)n	1	1
chr1	69916174	chr1	69916175	951	FALSE	scaffold00011_hap1	70074479	70075430	INS	1|0	Simple_repeat	1	Simple_repeat	1	(TA)n	1	1	Simple_repeat	1	Simple_repeat	1	(TA)n	1	1
chr1	70480506	chr1	70480837	331	FALSE	scaffold00011_hap1	70639744	70639745	DEL	1|1	Alu	0.97281	SINE	0.97281	AluY	0.97281		L1	1	LINE	1	L1MC5	1
chr1	70535214	chr1	70535215	36	FALSE	scaffold00011_hap1	70694152	70694188	INS	1|0	Simple_repeat	1	Simple_repeat	1	(TCTT)n	1	1	Simple_repeat	1	Simple_repeat	1	(TCTT)n	1	1
chr1	70647144	chr1	70647224	80	FALSE	scaffold00011_hap1	70806104	70806105	DEL	1|0	Simple_repeat	1	Simple_repeat	1	(TAGA)n	1	1							1
chr1	70647474	chr1	70647530	56	FALSE	scaffold00011_hap1	70806356	70806357	DEL	1|1	Simple_repeat	1	Simple_repeat	1	(TAGA)n	1	1							1
chr1	71275636	chr1	71275946	310	FALSE	scaffold00011_hap1	71434515	71434516	DEL	1|1	Alu	0.964516	SINE	0.964516	AluYb8	0.964516
chr1	71688419	chr1	71688420	75	FALSE	scaffold00011_hap1	71846831	71846906	INS	1|1	Simple_repeat	1	Simple_repeat	1	(AT)n	1	1	Simple_repeat	1	Simple_repeat	1	(AT)n	1	1
chr1	71793264	chr1	71793265	250	FALSE	scaffold00011_hap1	71951777	71952027	INS	1|1	Alu	1	SINE	1	AluSx4	1		Simple_repeat	0.9	Simple_repeat	0.9	(AT)n	0.9	0.9
chr1	71928131	chr1	71928132	328	FALSE	scaffold00011_hap1	72086883	72087211	INS	1|1	Simple_repeat	1	Simple_repeat	1	(TA)n	1	1							1
chr1	71928429	chr1	71928430	50	FALSE	scaffold00011_hap1	72087509	72087559	INS	1|0	Simple_repeat	1	Simple_repeat	1	(TA)n	1	1	L1	1	LINE	1	L1MC4	1	1
chr1	71983935	chr1	71984347	412	FALSE	scaffold00011_hap1	72143093	72143094	DEL	1|0								Alu	1	SINE	1	FLAM_C	1
chr1	71999650	chr1	71999680	30	FALSE	scaffold00011_hap1	72158397	72158398	DEL	1|0	Simple_repeat	0.966667	Simple_repeat	0.966667	(AT)n	0.966667	0.966667	Simple_repeat	1	Simple_repeat	1	(AT)n	1
chr1	72173337	chr1	72173338	369	FALSE	scaffold00011_hap1	72332067	72332436	INS	1|0	ERVL-MaLR	1	LTR	1	MLT1D	1		ERVL-MaLR	1	LTR	1	MLT1D	1
chr1	72515808	chr1	72515809	142	FALSE	scaffold00011_hap1	72629400	72629542	INS	1|1	Simple_repeat	1	Simple_repeat	1	(TG)n	1	1	L1	0.633803	LINE	0.633803	L1MC4	0.633803	0.971831
chr1	72556898	chr1	72556953	55	FALSE	scaffold00011_hap1	72670630	72670631	DEL	1|1	Simple_repeat	0.636364	Simple_repeat	0.636364	(TA)n	0.636364	0.636364	Alu	1	SINE	1	AluSx	1
chr1	72585138	chr1	72585139	44	FALSE	scaffold00011_hap1	72698813	72698857	INS	1|1	Low_complexity	1	Low_complexity	1	GA-rich	1	1	ERV1	1	LTR	1	HERV17-int	1	1
chr1	73129297	chr1	73130265	8210	FALSE	scaffold00011_hap1	73243970	73251212	INS	1|1	ERVK	1	LTR	1	LTR5_Hs	1		ERVK	0.763877	LTR	0.763877	HERVK-int	0.763877
chr1	73134334	chr1	73134335	30	TRUE	scaffold00011_hap1	73256252	73256282	INS	1|0	L1	1	LINE	1	L1PB1	1		Simple_repeat	1	Simple_repeat	1	(TA)n	1	1
chr1	73183136	chr1	73183137	83	FALSE	scaffold00011_hap1	73305078	73305161	INS	1|1
chr1	73287917	chr1	73288232	315	FALSE	scaffold00011_hap1	73409971	73409972	DEL	1|1	Alu	0.987302	SINE	0.987302	AluYa5	0.987302		L1	1	LINE	1	L1M4	1
chr1	73549542	chr1	73549543	34	FALSE	scaffold00011_hap1	73671180	73671214	INS	1|1	ERVL-MaLR	1	LTR	1	THE1B-int	1		ERVL-MaLR	1	LTR	1	THE1-int	1
chr1	73573094	chr1	73573134	40	FALSE	scaffold00011_hap1	73694766	73694767	DEL	1|1	Simple_repeat	1	Simple_repeat	1	(AT)n	1	1	hAT-Charlie	1	DNA	1	Charlie25	1
chr1	73777586	chr1	73777618	32	FALSE	scaffold00011_hap1	73899242	73899243	DEL	1|1	Alu	0.9375	SINE	0.9375	AluSx3	0.9375	1	Alu	1	SINE	1	AluSx3	1
chr1	73846748	chr1	73846999	251	FALSE	scaffold00011_hap1	73968363	73968364	DEL	1|1
chr1	73939954	chr1	73939955	54	FALSE	scaffold00011_hap1	74061307	74061361	INS	1|1	Simple_repeat	1	Simple_repeat	1	(TA)n	1	1	L1	0.833333	LINE	0.833333	L1MC4	0.833333	1
chr1	73971906	chr1	73971907	106	FALSE	scaffold00011_hap1	74093300	74093406	INS	1|1	Simple_repeat	1	Simple_repeat	1	(AT)n	1	1	Simple_repeat	1	Simple_repeat	1	(AT)n	1	1
chr1	74289484	chr1	74289605	121	FALSE	scaffold00011_hap1	74410932	74410933	DEL	1|1
chr1	74758446	chr1	74758447	266	FALSE	scaffold00011_hap1	74879720	74879986	INS	1|0							1							1
chr1	74989509	chr1	74989510	41	FALSE	scaffold00011_hap1	75111042	75111083	INS	1|1	L1	1	LINE	1	L1PA4	1		L1	1	LINE	1	L1PA4	1
chr1	75105220	chr1	75105256	36	FALSE	scaffold00011_hap1	75226774	75226775	DEL	1|1	Simple_repeat	1	Simple_repeat	1	(AT)n	1	1	Simple_repeat	1	Simple_repeat	1	(ATAT)n	1
chr1	75280137	chr1	75280138	337	FALSE	scaffold00011_hap1	75401680	75402017	INS	1|0							1							1
chr1	75280434	chr1	75280435	343	FALSE	scaffold00011_hap1	75402322	75402665	INS	1|1							1							1
chr1	75546180	chr1	75546510	330	FALSE	scaffold00011_hap1	75668426	75668427	DEL	1|1	Alu	0.966667	SINE	0.966667	AluYb8	0.966667
chr1	75885668	chr1	75885669	349	FALSE	scaffold00011_hap1	76007537	76007886	INS	1|1	Simple_repeat	1	Simple_repeat	1	(TA)n	1	1	Simple_repeat	1	Simple_repeat	1	(TA)n	1	1
chr1	75886182	chr1	75886183	30	FALSE	scaffold00011_hap1	76008402	76008432	INS	1|1	Simple_repeat	1	Simple_repeat	1	(TA)n	1	1	Simple_repeat	1	Simple_repeat	1	(TA)n	1	1
chr1	75886347	chr1	75886348	41	FALSE	scaffold00011_hap1	76008597	76008638	INS	1|1	Simple_repeat	1	Simple_repeat	1	(TA)n	1	1	Simple_repeat	1	Simple_repeat	1	(TA)n	1	1
chr1	75902673	chr1	75902721	48	FALSE	scaffold00011_hap1	76024937	76024938	DEL	1|1	Simple_repeat	1	Simple_repeat	1	(TA)n	1	1	L1	1	LINE	1	L1PA17	1
chr1	75906498	chr1	75906499	409	FALSE	scaffold00011_hap1	76028717	76029126	INS	1|1	Simple_repeat	1	Simple_repeat	1	(AT)n	1	1	Simple_repeat	1	Simple_repeat	1	(AT)n	1	1
chr1	75962669	chr1	75962731	62	FALSE	scaffold00011_hap1	76085327	76085328	DEL	1|1							1							1
chr1	76119806	chr1	76119842	36	FALSE	scaffold00011_hap1	76242379	76242380	DEL	1|1	Simple_repeat	0.611111	Simple_repeat	0.611111	(ATAG)n	0.611111	0.75	MIR	1	SINE	1	MIRb	1
chr1	76277534	chr1	76277590	56	FALSE	scaffold00011_hap1	76400091	76400092	DEL	1|1	Simple_repeat	1	Simple_repeat	1	(TA)n	1	1	Simple_repeat	1	Simple_repeat	1	(TA)n	1	1
chr1	76390946	chr1	76390947	332	FALSE	scaffold00011_hap1	76513482	76513814	INS	1|0	Alu	1	SINE	1	AluYm1	1		Alu	1	SINE	1	AluY	1
chr1	76774377	chr1	76774453	76	FALSE	scaffold00011_hap1	76897208	76897209	DEL	1|0	L2	0.618421	LINE	0.618421	L2a	0.618421		LTR	1	LTR	1	LTR91	1
chr1	76839732	chr1	76839733	102	FALSE	scaffold00011_hap1	76962473	76962575	INS	1|0	Simple_repeat	1	Simple_repeat	1	(AT)n	1	1	Simple_repeat	1	Simple_repeat	1	(AT)n	1	1
chr1	76846260	chr1	76846302	42	FALSE	scaffold00011_hap1	76969103	76969104	DEL	1|1	Simple_repeat	1	Simple_repeat	1	(AT)n	1	1	Simple_repeat	1	Simple_repeat	1	(AT)n	1	1
chr1	77010710	chr1	77010711	330	FALSE	scaffold00011_hap1	77133511	77133841	INS	1|0														1
chr1	77016172	chr1	77016173	76	FALSE	scaffold00011_hap1	77139299	77139375	INS	1|0	Simple_repeat	1	Simple_repeat	1	(CCT)n	1	1							1
chr1	77367747	chr1	77367748	70	FALSE	scaffold00011_hap1	77490970	77491040	INS	1|1	Simple_repeat	1	Simple_repeat	1	(AT)n	1	1							1
chr1	77367814	chr1	77367815	177	FALSE	scaffold00011_hap1	77491105	77491282	INS	1|1	Simple_repeat	1	Simple_repeat	1	(AT)n	1	1							1
chr1	77472787	chr1	77472788	573	FALSE	scaffold00011_hap1	77596258	77596831	INS	1|1	Alu	1	SINE	1	AluJb	1
chr1	77475398	chr1	77475474	76	FALSE	scaffold00011_hap1	77599424	77599425	DEL	1|1	Simple_repeat	1	Simple_repeat	1	(TA)n	1	1	Simple_repeat	1	Simple_repeat	1	(TA)n	1	1
chr1	77887951	chr1	77887952	31	FALSE	scaffold00011_hap1	78011877	78011908	INS	1|0	Simple_repeat	1	Simple_repeat	1	(TTC)n	1	1	Simple_repeat	1	Simple_repeat	1	(TTC)n	1	1
chr1	78061615	chr1	78061731	116	FALSE	scaffold00011_hap1	78185619	78185620	DEL	1|1								Alu	1	SINE	1	AluSg	1
chr1	78282175	chr1	78282237	62	FALSE	scaffold00011_hap1	78406047	78406048	DEL	1|0	L1	0.741935	LINE	0.741935	L1PA2	0.741935		L1	1	LINE	1	L1PA2	1
chr1	78415644	chr1	78415674	30	FALSE	scaffold00011_hap1	78539488	78539489	DEL	1|1							1							1
chr1	78643143	chr1	78643144	139	FALSE	scaffold00011_hap1	78766918	78767057	INS	1|0								Alu	0.877698	SINE	0.877698	AluYb8	0.877698
chr1	78865510	chr1	78865511	330	FALSE	scaffold00011_hap1	78989438	78989768	INS	1|0	L1	1	LINE	1	L1MC3	1		Alu	0.975758	SINE	0.975758	AluYk3	0.975758
chr1	78935823	chr1	78936145	322	FALSE	scaffold00011_hap1	79060060	79060061	DEL	1|0	Alu	0.944099	SINE	0.944099	AluYi6	0.944099
chr1	79027434	chr1	79027435	32	FALSE	scaffold00011_hap1	79151388	79151420	INS	1|0	L2	1	LINE	1	L2a	1		Simple_repeat	0.96875	Simple_repeat	0.96875	(TA)n	0.96875	0.96875
chr1	79116390	chr1	79116391	307	FALSE	scaffold00011_hap1	79240373	79240680	INS	1|0								Alu	1	SINE	1	AluYk4	1
chr1	79184459	chr1	79184460	130	FALSE	scaffold00011_hap1	79308747	79308877	INS	1|0														1
chr1	79372010	chr1	79372011	30	FALSE	scaffold00011_hap1	79496415	79496445	INS	1|0	Simple_repeat	1	Simple_repeat	1	(CCCTT)n	1	1	Simple_repeat	1	Simple_repeat	1	(CCCTT)n	1	1
chr1	79571308	chr1	79571343	35	FALSE	scaffold00011_hap1	79695702	79695703	DEL	1|1							1							1
chr1	79571428	chr1	79571488	60	FALSE	scaffold00011_hap1	79695787	79695788	DEL	1|0							1							1
chr1	79571655	chr1	79571849	194	FALSE	scaffold00011_hap1	79695954	79695955	DEL	1|0							1							1
chr1	79572449	chr1	79572450	34	FALSE	scaffold00011_hap1	79696548	79696582	INS	1|0							1							1
chr1	79648487	chr1	79648804	317	FALSE	scaffold00011_hap1	79772598	79772599	DEL	1|0	Alu	0.971609	SINE	0.971609	AluYa5	0.971609		L2	1	LINE	1	L2a	1
chr1	79756095	chr1	79757343	1248	FALSE	scaffold00011_hap1	79879887	79879888	DEL	1|1	L2	0.997596	LINE	0.997596	L2a	0.997596		Simple_repeat	1	Simple_repeat	1	(TTAT)n	1	1
chr1	79805469	chr1	79805470	140	FALSE	scaffold00011_hap1	79927970	79928110	INS	1|1
chr1	79833411	chr1	79833412	288	FALSE	scaffold00011_hap1	79956051	79956339	INS	1|0	ERV1	1	LTR	1	LTR37B	1		Alu	1	SINE	1	AluY	1
chr1	79883735	chr1	79883736	39	FALSE	scaffold00011_hap1	80006691	80006730	INS	1|1	ERVL-MaLR	1	LTR	1	THE1B-int	1		ERVL-MaLR	1	LTR	1	THE1B-int	1
chr1	79934313	chr1	79934314	32	FALSE	scaffold00011_hap1	80057332	80057364	INS	1|1	Simple_repeat	1	Simple_repeat	1	(TTTC)n	1	1	Simple_repeat	1	Simple_repeat	1	(TTTC)n	1	1
chr1	79947654	chr1	79947655	46	FALSE	scaffold00011_hap1	80070681	80070727	INS	1|0							1							1
chr1	80079571	chr1	80079572	203	FALSE	scaffold00011_hap1	80202583	80202786	INS	1|1	L2	1	LINE	1	L2a	1
chr1	80329361	chr1	80329393	32	FALSE	scaffold00011_hap1	80452642	80452643	DEL	1|0	Simple_repeat	1	Simple_repeat	1	(AT)n	1	1	L1	1	LINE	1	L1MC4	1	1
chr1	80330989	chr1	80331019	30	FALSE	scaffold00011_hap1	80454183	80454184	DEL	1|0							1							1
chr1	80939072	chr1	80945263	6191	FALSE	scaffold00011_hap1	81062340	81062341	DEL	1|1	L1	0.977871	LINE	0.977871	L1HS	0.977871		ERVL-MaLR	1	LTR	1	MSTD	1
chr1	81194671	chr1	81194672	199	FALSE	scaffold00011_hap1	81311689	81311888	INS	1|1								L1	0.879397	LINE	0.879397	L1MD3	0.879397
chr1	81222099	chr1	81222428	329	FALSE	scaffold00011_hap1	81339334	81339335	DEL	1|1	Alu	0.960486	SINE	0.960486	AluYb8	0.960486
chr1	81998939	chr1	81998940	44	FALSE	scaffold00011_hap1	82115847	82115891	INS	1|0	Simple_repeat	1	Simple_repeat	1	(TA)n	1	1							1
chr1	82046231	chr1	82046268	37	FALSE	scaffold00011_hap1	82163184	82163185	DEL	1|1							1	ERVL	1	LTR	1	ERV3-16A3_LTR	1	1
chr1	82256026	chr1	82256027	3121	FALSE	scaffold00011_hap1	82372933	82376054	INS	1|1	L1	1	LINE	1	L1PA2	1
chr1	82415094	chr1	82415095	107	FALSE	scaffold00011_hap1	82535100	82535207	INS	1|0	L2	1	LINE	1	L2a	1		L2	1	LINE	1	L2c	1
chr1	82576961	chr1	82577281	320	FALSE	scaffold00011_hap1	82697020	82697021	DEL	1|1	Alu	0.984375	SINE	0.984375	AluYa5	0.984375
chr1	82660275	chr1	82661886	1611	FALSE	scaffold00011_hap1	82780015	82780016	DEL	1|1	L1	0.934202	LINE	0.934202	L1HS	0.934202
chr1	82666350	chr1	82666351	80	FALSE	scaffold00011_hap1	82784479	82784559	INS	1|1	Alu	1	SINE	1	AluJb	1		Alu	1	SINE	1	AluJb	1
chr1	82741181	chr1	82741215	34	FALSE	scaffold00011_hap1	82859419	82859420	DEL	1|1							1							1
chr1	83013572	chr1	83013637	65	FALSE	scaffold00011_hap1	83131692	83131693	DEL	1|1	Simple_repeat	1	Simple_repeat	1	(AATAG)n	1	1	Simple_repeat	1	Simple_repeat	1	(AATAG)n	1	1
chr1	83109133	chr1	83109134	36	FALSE	scaffold00011_hap1	83227190	83227226	INS	1|0	Simple_repeat	1	Simple_repeat	1	(AT)n	1	1	Simple_repeat	1	Simple_repeat	1	(AT)n	1	1
chr1	83123083	chr1	83123084	129	FALSE	scaffold00011_hap1	83241166	83241295	INS	1|0								Simple_repeat	1	Simple_repeat	1	(TTAA)n	1	0.674419
chr1	83144051	chr1	83144052	1742	FALSE	scaffold00011_hap1	83262265	83264007	INS	1|0	L1	1	LINE	1	L1PA15	1		L1	0.996556	LINE	0.996556	L1HS	0.996556
chr1	83202189	chr1	83202227	38	TRUE	scaffold00011_hap1	83364148	83364149	DEL	1|0
chr1	83205756	chr1	83206070	314	TRUE	scaffold00011_hap1	83367677	83367678	DEL	1|0	Alu	0.968153	SINE	0.968153	AluYa5	0.968153
chr1	83215653	chr1	83215654	87	FALSE	scaffold00011_hap1	83377249	83377336	INS	1|1														1
chr1	83235823	chr1	83235824	172	FALSE	scaffold00011_hap1	83397544	83397716	INS	1|0								MIR	0.563953	SINE	0.563953	MIR	0.563953
chr1	83242545	chr1	83242860	315	TRUE	scaffold00011_hap1	83404438	83404439	DEL	1|0	Alu	0.965079	SINE	0.965079	AluYb8	0.965079		ERVL-MaLR	1	LTR	1	MLT1O	1
chr1	83287806	chr1	83287913	107	TRUE	scaffold00011_hap1	83449352	83449353	DEL	1|0							1
chr1	83892270	chr1	83892328	58	FALSE	scaffold00011_hap1	84053554	84053555	DEL	1|0							1							1
chr1	83892742	chr1	83892743	96	FALSE	scaffold00011_hap1	84054014	84054110	INS	1|0							1							1
chr1	84027517	chr1	84027518	39	FALSE	scaffold00011_hap1	84188905	84188944	INS	1|1							1							1
chr1	84052242	chr1	84058946	6704	FALSE	scaffold00011_hap1	84213665	84213666	DEL	1|1	L1	0.897524	LINE	0.897524	L1HS	0.897524
chr1	84421095	chr1	84421096	51	FALSE	scaffold00011_hap1	84575771	84575822	INS	1|0	Alu	1	SINE	1	AluJb	1	1	Alu	1	SINE	1	AluJb	1	1
chr1	84421147	chr1	84421180	33	FALSE	scaffold00011_hap1	84575874	84575875	DEL	1|0	CR1	1	LINE	1	L3	1	1	CR1	1	LINE	1	L3	1	1
chr1	84447591	chr1	84447592	316	FALSE	scaffold00011_hap1	84602281	84602597	INS	1|0	L1	1	LINE	1	L1PA7	1		L1	1	LINE	1	L1PA7	1
chr1	84756772	chr1	84756773	244	FALSE	scaffold00011_hap1	84911713	84911957	INS	1|0	Low_complexity	1	Low_complexity	1	GA-rich	1	1							1
chr1	85064696	chr1	85064827	131	FALSE	scaffold00011_hap1	85219828	85219829	DEL	1|0	Alu	0.580153	SINE	0.580153	AluSx1	0.580153		Alu	1	SINE	1	AluSx1	1
chr1	85133534	chr1	85133535	366	FALSE	scaffold00011_hap1	85288521	85288887	INS	1|0	L1	1	LINE	1	L1M5	1		Alu	0.863388	SINE	0.863388	AluYb8	0.863388
chr1	85154441	chr1	85154442	514	FALSE	scaffold00011_hap1	85309809	85310323	INS	1|1	Alu	1	SINE	1	AluSx3	1		Alu	0.661479	SINE	0.661479	AluYk2	0.661479
chr1	85282937	chr1	85283267	330	FALSE	scaffold00011_hap1	85438798	85438799	DEL	1|0	Alu	0.963636	SINE	0.963636	AluYb8	0.963636		MIR	1	SINE	1	MIR	1
chr1	85440801	chr1	85440875	74	FALSE	scaffold00011_hap1	85596316	85596317	DEL	1|0
chr1	85996493	chr1	85996494	42	FALSE	scaffold00011_hap1	86151901	86151943	INS	1|1	Alu	1	SINE	1	AluSx1	1		Alu	1	SINE	1	AluSx	1
chr1	85997055	chr1	85997056	38	FALSE	scaffold00011_hap1	86152505	86152543	INS	1|1	Simple_repeat	1	Simple_repeat	1	(TA)n	1	1	Simple_repeat	0.578947	Simple_repeat	0.578947	(TA)n	0.578947	0.578947
chr1	86097505	chr1	86097539	34	FALSE	scaffold00011_hap1	86252967	86252968	DEL	1|1	Simple_repeat	1	Simple_repeat	1	(TCT)n	1	1	Simple_repeat	1	Simple_repeat	1	(TCC)n	1	1
chr1	86216562	chr1	86216563	224	FALSE	scaffold00011_hap1	86371951	86372175	INS	1|1	SVA	1	Retroposon	1	SVA_F	1	1	SVA	1	Retroposon	1	SVA_F	1	1
chr1	86216681	chr1	86216682	50	FALSE	scaffold00011_hap1	86372294	86372344	INS	1|1	SVA	1	Retroposon	1	SVA_F	1	1	SVA	1	Retroposon	1	SVA_F	1	1
chr1	86275297	chr1	86276014	717	FALSE	scaffold00011_hap1	86430939	86430940	DEL	1|1	L1	0.987448	LINE	0.987448	L1HS	0.987448		L1	1	LINE	1	L1M1	1
chr1	86797318	chr1	86797319	254	FALSE	scaffold00011_hap1	86952131	86952385	INS	1|0	Simple_repeat	1	Simple_repeat	1	(TATATTA)n	1	1	Simple_repeat	1	Simple_repeat	1	(ATATAAT)n	1	1
chr1	86797378	chr1	86797379	341	FALSE	scaffold00011_hap1	86952450	86952791	INS	1|0	Simple_repeat	1	Simple_repeat	1	(TATATTA)n	1	1	Simple_repeat	1	Simple_repeat	1	(ATATAAT)n	1	1
chr1	86797705	chr1	86797736	31	FALSE	scaffold00011_hap1	86953108	86953109	DEL	1|0	Simple_repeat	1	Simple_repeat	1	(TATATTA)n	1	1	Simple_repeat	1	Simple_repeat	1	(ATATAAT)n	1	1
chr1	86985455	chr1	86985511	56	FALSE	scaffold00011_hap1	87140869	87140870	DEL	1|1	Simple_repeat	1	Simple_repeat	1	(ATATATACAC)n	1	1	Simple_repeat	1	Simple_repeat	1	(ATATATACAC)n	1	1
chr1	87037197	chr1	87037198	72	FALSE	scaffold00011_hap1	87192532	87192604	INS	1|1														1
chr1	87046752	chr1	87046753	2111	FALSE	scaffold00011_hap1	87202155	87204266	INS	1|1	Alu	1	SINE	1	AluSx1	1
chr1	87425251	chr1	87425252	33	FALSE	scaffold00011_hap1	87582777	87582810	INS	1|0
chr1	87768687	chr1	87768688	36	FALSE	scaffold00011_hap1	87926229	87926265	INS	1|0	Simple_repeat	1	Simple_repeat	1	(TA)n	1	1	L1	1	LINE	1	L1ME3E	1
chr1	88314417	chr1	88314418	38	FALSE	scaffold00011_hap1	88471959	88471997	INS	1|1								L2	1	LINE	1	L2	1
chr1	88395034	chr1	88395035	95	FALSE	scaffold00011_hap1	88552610	88552705	INS	1|1
chr1	88457679	chr1	88457680	189	FALSE	scaffold00011_hap1	88615334	88615523	INS	1|1	Simple_repeat	1	Simple_repeat	1	(AC)n	1	1	Simple_repeat	1	Simple_repeat	1	(AC)n	1	1
chr1	89354533	chr1	89354657	124	FALSE	scaffold00011_hap1	89512289	89512290	DEL	1|1	ERV1	1	LTR	1	MER50B	1	1	ERV1	1	LTR	1	MER50B	1
chr1	90075864	chr1	90075865	195	FALSE	scaffold00011_hap1	90233459	90233654	INS	1|0	Simple_repeat	1	Simple_repeat	1	(AT)n	1	1	Simple_repeat	1	Simple_repeat	1	(AT)n	1	1
chr1	90183784	chr1	90183785	155	FALSE	scaffold00011_hap1	90341593	90341748	INS	1|0							1							1
chr1	90311039	chr1	90311040	52	FALSE	scaffold00011_hap1	90469012	90469064	INS	1|1	Simple_repeat	1	Simple_repeat	1	(CTTC)n	1	1	Simple_repeat	1	Simple_repeat	1	(CTTC)n	1	1
chr1	90378738	chr1	90378739	60	FALSE	scaffold00011_hap1	90536834	90536894	INS	1|0							1							1
chr1	90378910	chr1	90378911	66	FALSE	scaffold00011_hap1	90537083	90537149	INS	1|1							1							1
chr1	90379123	chr1	90379124	232	FALSE	scaffold00011_hap1	90537370	90537602	INS	1|1							1							1
chr1	90392793	chr1	90392837	44	FALSE	scaffold00011_hap1	90551268	90551269	DEL	1|1	Simple_repeat	0.954545	Simple_repeat	0.954545	(TCTC)n	0.954545	0.954545	Simple_repeat	1	Simple_repeat	1	(TC)n	1	1
chr1	90817980	chr1	90817981	34	FALSE	scaffold00011_hap1	90976418	90976452	INS	1|1	Simple_repeat	1	Simple_repeat	1	(AT)n	1	1	Simple_repeat	1	Simple_repeat	1	(AT)n	1	1
chr1	90826107	chr1	90826108	34	FALSE	scaffold00011_hap1	90984583	90984617	INS	1|1	ERVL	1	LTR	1	MLT2B2	1		ERVL	1	LTR	1	MLT2B1	1	1
chr1	90826243	chr1	90826293	50	FALSE	scaffold00011_hap1	90984753	90984754	DEL	1|0	Simple_repeat	1	Simple_repeat	1	(ATACAC)n	1	1	ERVL	1	LTR	1	MLT2B1	1	1
chr1	90867278	chr1	90867279	30	FALSE	scaffold00011_hap1	91025764	91025794	INS	1|1	Simple_repeat	1	Simple_repeat	1	(TA)n	1		Simple_repeat	1	Simple_repeat	1	(TA)n	1	1
chr1	90891782	chr1	90891783	49	FALSE	scaffold00011_hap1	91050295	91050344	INS	1|1	SVA	1	Retroposon	1	SVA_D	1		SVA	1	Retroposon	1	SVA_D	1	1
chr1	90950292	chr1	90950293	95	FALSE	scaffold00011_hap1	91108857	91108952	INS	1|1	Simple_repeat	1	Simple_repeat	1	(GGAGG)n	1		Simple_repeat	1	Simple_repeat	1	(GGAGG)n	1	1
chr1	91159214	chr1	91159497	283	FALSE	scaffold00011_hap1	91317857	91317858	DEL	1|1	Alu	0.943463	SINE	0.943463	AluYa5	0.943463		ERVL-MaLR	1	LTR	1	MLT1D	1
chr1	91168589	chr1	91168590	56	FALSE	scaffold00011_hap1	91326921	91326977	INS	1|0							1	L1	1	LINE	1	L1MC4	1	1
chr1	91169307	chr1	91169345	38	FALSE	scaffold00011_hap1	91327680	91327681	DEL	1|0	Simple_repeat	1	Simple_repeat	1	(TATATG)n	1	1	L1	1	LINE	1	L1MC4	1	1
chr1	91169445	chr1	91169483	38	FALSE	scaffold00011_hap1	91327784	91327785	DEL	1|1	Simple_repeat	1	Simple_repeat	1	(TATATG)n	1	1	L1	1	LINE	1	L1MC4	1	1
chr1	91216471	chr1	91216472	314	FALSE	scaffold00011_hap1	91374739	91375053	INS	1|0	L1	1	LINE	1	L1PA2	1		L1	1	LINE	1	L1PA2	1
chr1	91459294	chr1	91459295	66	FALSE	scaffold00011_hap1	91617874	91617940	INS	1|0	Simple_repeat	1	Simple_repeat	1	(ATATAAT)n	1	1	Simple_repeat	1	Simple_repeat	1	(TATTATA)n	1	1
chr1	91668766	chr1	91669342	576	FALSE	scaffold00011_hap1	91827390	91827391	DEL	1|1							1	ERV1	1	LTR	1	Harlequin-int	1	1
chr1	91840380	chr1	91840420	40	FALSE	scaffold00011_hap1	91998429	91998430	DEL	1|0	hAT-Charlie	0.65	DNA	0.65	Charlie1a	0.65	1	hAT-Charlie	1	DNA	1	Charlie1a	1	1
chr1	91927288	chr1	91927289	36	FALSE	scaffold00011_hap1	92085346	92085382	INS	1|0	Simple_repeat	1	Simple_repeat	1	(CA)n	1	1	Simple_repeat	0.527778	Simple_repeat	0.527778	(CA)n	0.527778	0.888889
chr1	91938892	chr1	91938893	35	FALSE	scaffold00011_hap1	92097001	92097036	INS	1|0	Alu	1	SINE	1	AluSp	1	1	Simple_repeat	1	Simple_repeat	1	(TAAAA)n	1	1
chr1	92213447	chr1	92213448	62	FALSE	scaffold00011_hap1	92371553	92371615	INS	1|0	L2	1	LINE	1	L2a	1		L2	1	LINE	1	L2a	1	1
chr1	92513510	chr1	92513540	30	FALSE	scaffold00011_hap1	92671622	92671623	DEL	1|0	Simple_repeat	1	Simple_repeat	1	(AT)n	1	1	Simple_repeat	1	Simple_repeat	1	(AT)n	1	1
chr1	92701962	chr1	92701963	326	FALSE	scaffold00011_hap1	92860043	92860369	INS	1|1								Alu	0.966258	SINE	0.966258	AluYa5	0.966258
chr1	92796716	chr1	92796839	55	FALSE	scaffold00011_hap1	92955131	92955199	DEL	1|1								L2	0.647059	LINE	0.647059	L2a	0.647059
chr1	92821236	chr1	92821237	36	FALSE	scaffold00011_hap1	92979606	92979642	INS	1|0	Simple_repeat	1	Simple_repeat	1	(TA)n	1	1	L1	1	LINE	1	L1MC4	1	1
chr1	92821313	chr1	92821367	54	FALSE	scaffold00011_hap1	92979715	92979716	DEL	1|0	Simple_repeat	1	Simple_repeat	1	(AT)n	1	1	L1	1	LINE	1	L1MC4	1	1
chr1	92821452	chr1	92821492	40	FALSE	scaffold00011_hap1	92979826	92979827	DEL	1|0	Simple_repeat	1	Simple_repeat	1	(AT)n	1	1	L1	1	LINE	1	L1MC4	1	1
chr1	92846848	chr1	92846849	68	FALSE	scaffold00011_hap1	93005187	93005255	INS	1|0	Simple_repeat	1	Simple_repeat	1	(AT)n	1	1	L1	0.852941	LINE	0.852941	L1MC4	0.852941	1
chr1	92940995	chr1	92941028	33	FALSE	scaffold00011_hap1	93099414	93099415	DEL	1|1	L1	1	LINE	1	L1MD	1		hAT-Charlie	1	DNA	1	Charlie2b	1
chr1	93032655	chr1	93032656	323	FALSE	scaffold00011_hap1	93191061	93191384	INS	1|1								Alu	1	SINE	1	AluYa5	1
chr1	93053222	chr1	93053223	48	FALSE	scaffold00011_hap1	93211965	93212013	INS	1|1	Simple_repeat	1	Simple_repeat	1	(T)n	1		Simple_repeat	0.875	Simple_repeat	0.875	(TTTG)n	0.875	1
chr1	93344857	chr1	93344858	125	FALSE	scaffold00011_hap1	93503646	93503771	INS	1|1	Simple_repeat	1	Simple_repeat	1	(AT)n	1	1	Simple_repeat	1	Simple_repeat	1	(AT)n	1	1
chr1	93822816	chr1	93825700	2884	FALSE	scaffold00011_hap1	93981743	93981744	DEL	1|0
chr1	93876138	chr1	93876139	2519	FALSE	scaffold00011_hap1	94032160	94034679	INS	1|1
chr1	94384465	chr1	94384514	49	FALSE	scaffold00011_hap1	94542993	94542994	DEL	1|0	MIR	1	SINE	1	MIRb	1		MIR	1	SINE	1	MIRb	1
chr1	94477681	chr1	94477763	82	FALSE	scaffold00011_hap1	94636128	94636129	DEL	1|1
chr1	94689707	chr1	94689747	40	FALSE	scaffold00011_hap1	94848064	94848065	DEL	1|0	Simple_repeat	1	Simple_repeat	1	(AAAG)n	1	1
chr1	95045938	chr1	95045939	58	FALSE	scaffold00011_hap1	95204192	95204250	INS	1|0							1							1
chr1	95224954	chr1	95225273	319	FALSE	scaffold00011_hap1	95383247	95383248	DEL	1|0	Alu	0.956113	SINE	0.956113	AluYa5	0.956113		Low_complexity	1	Low_complexity	1	A-rich	1
chr1	95249936	chr1	95249974	38	FALSE	scaffold00011_hap1	95407927	95407928	DEL	1|0							1							1
chr1	95806220	chr1	95806221	35	FALSE	scaffold00011_hap1	95964166	95964201	INS	1|0	Simple_repeat	1	Simple_repeat	1	(CCTT)n	1	1	Simple_repeat	1	Simple_repeat	1	(TCCT)n	1	1
chr1	96017524	chr1	96017608	84	FALSE	scaffold00011_hap1	96175479	96175480	DEL	1|1	Simple_repeat	1	Simple_repeat	1	(ATAT)n	1	1	L1	1	LINE	1	L1MC4	1	1
chr1	96153152	chr1	96153153	68	FALSE	scaffold00011_hap1	96311020	96311088	INS	1|0	ERV1	1	LTR	1	LTR12	1	1	ERV1	1	LTR	1	LTR12D	1	1
chr1	96265690	chr1	96265691	250	FALSE	scaffold00011_hap1	96423621	96423871	INS	1|0	Simple_repeat	1	Simple_repeat	1	(TA)n	1	1							1
chr1	96403162	chr1	96403233	71	FALSE	scaffold00011_hap1	96561355	96561356	DEL	1|0	Simple_repeat	0.732394	Simple_repeat	0.732394	(GAAA)n	0.732394	1	Alu	1	SINE	1	AluSx1	1
chr1	96524323	chr1	96524360	37	FALSE	scaffold00011_hap1	96682438	96682439	DEL	1|0	Simple_repeat	1	Simple_repeat	1	(AGTG)n	1	1							1
chr1	97130751	chr1	97130845	94	FALSE	scaffold00011_hap1	97288816	97288817	DEL	1|1	Simple_repeat	1	Simple_repeat	1	(TTCC)n	1	1	Simple_repeat	1	Simple_repeat	1	(TTCC)n	1	1
chr1	97323345	chr1	97323346	30	FALSE	scaffold00011_hap1	97481271	97481301	INS	1|1	Simple_repeat	1	Simple_repeat	1	(TA)n	1	1	L1	1	LINE	1	L1MC4	1	1
chr1	98046177	chr1	98046178	105	FALSE	scaffold00011_hap1	98204075	98204180	INS	1|0	Simple_repeat	1	Simple_repeat	1	(GCTGCC)n	1	1	ERVL-MaLR	0.866667	LTR	0.866667	MLT1N2	0.866667	1
chr1	98139738	chr1	98139739	355	FALSE	scaffold00011_hap1	98297717	98298072	INS	1|0
chr1	99112048	chr1	99112049	131	FALSE	scaffold00011_hap1	99270380	99270511	INS	1|1	Simple_repeat	1	Simple_repeat	1	(TA)n	1	1	Simple_repeat	1	Simple_repeat	1	(TA)n	1	1
chr1	99499582	chr1	99499583	64	FALSE	scaffold00011_hap1	99658036	99658100	INS	1|0
chr1	99666307	chr1	99666403	96	FALSE	scaffold00011_hap1	99824786	99824787	DEL	1|0							1
chr1	99823649	chr1	99823650	43	FALSE	scaffold00011_hap1	99982015	99982058	INS	1|0	SVA	1	Retroposon	1	SVA_D	1	1	SVA	1	Retroposon	1	SVA_A	1	1
chr1	99826984	chr1	99826985	44	FALSE	scaffold00011_hap1	99985414	99985458	INS	1|0	Simple_repeat	1	Simple_repeat	1	(GAAA)n	1	1	Low_complexity	1	Low_complexity	1	GA-rich	1	1
chr1	99857787	chr1	99857788	30	FALSE	scaffold00011_hap1	100016224	100016254	INS	1|1	SVA	1	Retroposon	1	SVA_C	1	1	Low_complexity	0.566667	Low_complexity	0.566667	G-rich	0.566667	1
chr1	99890346	chr1	99890347	226	FALSE	scaffold00011_hap1	100048795	100049021	INS	1|0
chr1	100528659	chr1	100528660	334	FALSE	scaffold00011_hap1	100687275	100687609	INS	1|1								Alu	0.946108	SINE	0.946108	AluYb9	0.946108
chr1	100817826	chr1	100817891	65	FALSE	scaffold00011_hap1	100976806	100976807	DEL	1|0	Simple_repeat	0.815385	Simple_repeat	0.815385	(AT)n	0.815385	1							1
chr1	100819213	chr1	100819214	514	FALSE	scaffold00011_hap1	100978126	100978640	INS	1|0								L1	1	LINE	1	L1MEc	1
chr1	101253202	chr1	101253276	74	FALSE	scaffold00011_hap1	101412648	101412649	DEL	1|1	Simple_repeat	1	Simple_repeat	1	(TA)n	1	1	Simple_repeat	1	Simple_repeat	1	(TA)n	1	1
chr1	101253572	chr1	101253573	664	FALSE	scaffold00011_hap1	101412946	101413610	INS	1|1	Simple_repeat	1	Simple_repeat	1	(TA)n	1	1	Simple_repeat	1	Simple_repeat	1	(TA)n	1	1
chr1	101253797	chr1	101253851	54	FALSE	scaffold00011_hap1	101413835	101413836	DEL	1|1	Simple_repeat	1	Simple_repeat	1	(TA)n	1	1	Simple_repeat	1	Simple_repeat	1	(TA)n	1	1
chr1	101258573	chr1	101258649	76	FALSE	scaffold00011_hap1	101418553	101418554	DEL	1|1	Simple_repeat	0.921053	Simple_repeat	0.921053	(TCTT)n	0.921053	0.921053	Gypsy	1	LTR	1	LTR81B	1
chr1	101304496	chr1	101304497	318	FALSE	scaffold00011_hap1	101464391	101464709	INS	1|1								Alu	0.95283	SINE	0.95283	AluY	0.95283
chr1	101350820	chr1	101350821	66	FALSE	scaffold00011_hap1	101511025	101511091	INS	1|0	Simple_repeat	1	Simple_repeat	1	(AT)n	1	1	Simple_repeat	1	Simple_repeat	1	(AT)n	1	1
chr1	101441707	chr1	101441743	36	FALSE	scaffold00011_hap1	101601987	101601988	DEL	1|1	Simple_repeat	1	Simple_repeat	1	(CTTT)n	1	1	Simple_repeat	1	Simple_repeat	1	(CTTT)n	1	1
chr1	101513424	chr1	101513425	2986	FALSE	scaffold00011_hap1	101673673	101676659	INS	1|1								L1	0.574012	LINE	0.574012	L1HS	0.574012
chr1	101552697	chr1	101552784	87	TRUE	scaffold00011_hap1	101715921	101715922	DEL	1|0							1							1
chr1	101553954	chr1	101553955	100	TRUE	scaffold00011_hap1	101717121	101717221	INS	1|0							1							1
chr1	101657946	chr1	101658034	88	FALSE	scaffold00011_hap1	101821236	101821237	DEL	1|1	Simple_repeat	1	Simple_repeat	1	(TTC)n	1	1	Alu	1	SINE	1	AluSx	1
chr1	102045514	chr1	102045515	42	FALSE	scaffold00011_hap1	102208704	102208746	INS	1|0	Simple_repeat	1	Simple_repeat	1	(AT)n	1	1	Simple_repeat	1	Simple_repeat	1	(AT)n	1	1
chr1	102047085	chr1	102047086	67	FALSE	scaffold00011_hap1	102210321	102210388	INS	1|1	ERV1	1	LTR	1	MER50-int	1		ERV1	1	LTR	1	MER50-int	1
chr1	102093582	chr1	102093583	82	FALSE	scaffold00011_hap1	102256878	102256960	INS	1|0	Simple_repeat	1	Simple_repeat	1	(AT)n	1	1	Simple_repeat	1	Simple_repeat	1	(TA)n	1	1
chr1	102093660	chr1	102093661	110	FALSE	scaffold00011_hap1	102257037	102257147	INS	1|0	Simple_repeat	1	Simple_repeat	1	(AT)n	1	1	Simple_repeat	1	Simple_repeat	1	(TA)n	1	1
chr1	102411226	chr1	102411256	30	FALSE	scaffold00011_hap1	102574804	102574805	DEL	1|1	Simple_repeat	1	Simple_repeat	1	(AAG)n	1	1	Simple_repeat	1	Simple_repeat	1	(AAG)n	1	1
chr1	102582122	chr1	102582452	330	FALSE	scaffold00011_hap1	102745623	102745624	DEL	1|1	Alu	0.942424	SINE	0.942424	AluY	0.942424
chr1	102630509	chr1	102630828	319	FALSE	scaffold00011_hap1	102793689	102793690	DEL	1|1	Alu	0.965517	SINE	0.965517	AluYa5	0.965517
chr1	102645433	chr1	102645500	67	FALSE	scaffold00011_hap1	102808285	102808286	DEL	1|1							1
chr1	103173111	chr1	103173112	74	FALSE	scaffold00011_hap1	103335975	103336049	INS	1|1	Simple_repeat	1	Simple_repeat	1	(AT)n	1	1	Simple_repeat	1	Simple_repeat	1	(AT)n	1	1
chr1	103173184	chr1	103173185	106	FALSE	scaffold00011_hap1	103336122	103336228	INS	1|1	Simple_repeat	1	Simple_repeat	1	(AT)n	1	1	Simple_repeat	1	Simple_repeat	1	(AT)n	1	1
chr1	103182197	chr1	103182231	34	FALSE	scaffold00011_hap1	103345217	103345218	DEL	1|0							1							1
chr1	103182560	chr1	103182561	59	FALSE	scaffold00011_hap1	103345546	103345605	INS	1|1							1							1
chr1	103253208	chr1	103253209	309	FALSE	scaffold00011_hap1	103416334	103416643	INS	1|0
chr1	103272220	chr1	103272221	108	FALSE	scaffold00011_hap1	103435662	103435770	INS	1|1								ERVL	1	LTR	1	HERVL-int	1
chr1	103350760	chr1	103350761	77	FALSE	scaffold00011_hap1	103514263	103514340	INS	1|1	Simple_repeat	1	Simple_repeat	1	(AT)n	1	1							1
chr1	103363521	chr1	103363554	33	FALSE	scaffold00011_hap1	103527153	103527154	DEL	1|1	Simple_repeat	1	Simple_repeat	1	(TA)n	1	1	Simple_repeat	1	Simple_repeat	1	(AT)n	1	1
chr1	103364651	chr1	103364698	47	FALSE	scaffold00011_hap1	103528246	103528247	DEL	1|1	Simple_repeat	1	Simple_repeat	1	(TA)n	1	1	Simple_repeat	1	Simple_repeat	1	(AT)n	1	1
chr1	103365317	chr1	103365348	31	FALSE	scaffold00011_hap1	103528866	103528867	DEL	1|1	Simple_repeat	1	Simple_repeat	1	(TA)n	1	1	Simple_repeat	1	Simple_repeat	1	(AT)n	1	1
chr1	103405427	chr1	103405428	239	FALSE	scaffold00011_hap1	103568964	103569203	INS	1|1	ERVL-MaLR	1	LTR	1	MLT1H1	1
chr1	103684065	chr1	103684066	36	TRUE	scaffold00011_hap1	104129642	104129678	INS	1|0	ERV1	1	LTR	1	LTR25-int	1		ERV1	1	LTR	1	LTR25-int	1	1
chr1	103938231	chr1	103938232	5279	FALSE	scaffold00011_hap1	104305790	104311069	INS	1|1	ERVL-MaLR	1	LTR	1	MSTA	1
chr1	104562275	chr1	104562276	160	FALSE	scaffold00011_hap1	104935110	104935270	INS	1|0	Simple_repeat	1	Simple_repeat	1	(AT)n	1	1	Simple_repeat	0.9875	Simple_repeat	0.9875	(TA)n	0.9875	0.9875
chr1	104619750	chr1	104619751	38	FALSE	scaffold00011_hap1	104992700	104992738	INS	1|0	Alu	1	SINE	1	AluJb	1		Simple_repeat	1	Simple_repeat	1	(AT)n	1	1
chr1	104688481	chr1	104688482	136	FALSE	scaffold00011_hap1	105061409	105061545	INS	1|1	MIR	1	SINE	1	MIR	1		Alu	0.955882	SINE	0.955882	AluYc	0.955882
chr1	104885687	chr1	104886017	330	FALSE	scaffold00011_hap1	105258713	105258714	DEL	1|1	Alu	0.981818	SINE	0.981818	AluYa5	0.981818		L1	1	LINE	1	L1PA16	1
chr1	104966294	chr1	104966295	71	FALSE	scaffold00011_hap1	105338966	105339037	INS	1|1	Simple_repeat	1	Simple_repeat	1	(CTTC)n	1	1	Simple_repeat	1	Simple_repeat	1	(TCCT)n	1	1
chr1	104966560	chr1	104966561	45	FALSE	scaffold00011_hap1	105339301	105339346	INS	1|1	Simple_repeat	1	Simple_repeat	1	(CTTCC)n	1	1	Simple_repeat	1	Simple_repeat	1	(CTTCCCTTCC)n	1	1
chr1	105075326	chr1	105075327	188	FALSE	scaffold00011_hap1	105448107	105448295	INS	1|0	Simple_repeat	1	Simple_repeat	1	(ATAT)n	1	1							1
chr1	105085951	chr1	105085952	62	FALSE	scaffold00011_hap1	105458920	105458982	INS	1|0														1
chr1	105324148	chr1	105324422	274	FALSE	scaffold00011_hap1	105697234	105697235	DEL	1|1	Alu	0.959854	SINE	0.959854	AluYb9	0.959854		L1	1	LINE	1	L1MA2	1
chr1	105571333	chr1	105571334	2260	FALSE	scaffold00011_hap1	105944045	105946305	INS	1|1
chr1	105769140	chr1	105769251	111	FALSE	scaffold00011_hap1	106143991	106143992	DEL	1|1							1							1
chr1	105788297	chr1	105788298	202	FALSE	scaffold00011_hap1	106163045	106163247	INS	1|1	Alu	1	SINE	1	AluSz	1		Alu	0.985149	SINE	0.985149	AluY	0.985149
chr1	105943304	chr1	105943305	122	FALSE	scaffold00011_hap1	106318225	106318347	INS	1|0
chr1	105961394	chr1	105961395	509	FALSE	scaffold00011_hap1	106336436	106336945	INS	1|1	Simple_repeat	1	Simple_repeat	1	(TA)n	1	1	Simple_repeat	1	Simple_repeat	1	(TA)n	1	1
chr1	105963307	chr1	105963308	679	FALSE	scaffold00011_hap1	106338861	106339540	INS	1|1	Simple_repeat	1	Simple_repeat	1	(AT)n	1	1							1
chr1	106426990	chr1	106427151	161	FALSE	scaffold00011_hap1	106803220	106803221	DEL	1|0	Simple_repeat	0.832298	Simple_repeat	0.832298	(TATATATACG)n	0.832298	1	Simple_repeat	1	Simple_repeat	1	(AT)n	1
chr1	106431087	chr1	106431088	88	FALSE	scaffold00011_hap1	106807158	106807246	INS	1|0							1							1
chr1	106431422	chr1	106431423	93	FALSE	scaffold00011_hap1	106807581	106807674	INS	1|0							1							1
chr1	106477791	chr1	106477898	107	FALSE	scaffold00011_hap1	106854040	106854041	DEL	1|0	L1	1	LINE	1	L1PB2	1		L1	1	LINE	1	L1PB2	1
chr1	106683557	chr1	106683558	34	FALSE	scaffold00011_hap1	107059719	107059753	INS	1|1	Simple_repeat	1	Simple_repeat	1	(AT)n	1	1	Simple_repeat	0.588235	Simple_repeat	0.588235	(AT)n	0.588235	0.617647
chr1	106860882	chr1	106860883	32	FALSE	scaffold00011_hap1	107237047	107237079	INS	1|1	Low_complexity	1	Low_complexity	1	GA-rich	1	1	Low_complexity	1	Low_complexity	1	GA-rich	1	1
chr1	106861183	chr1	106861223	40	FALSE	scaffold00011_hap1	107237380	107237381	DEL	1|1	Simple_repeat	0.875	Simple_repeat	0.875	(GAAG)n	0.875	0.875	Simple_repeat	1	Simple_repeat	1	(GGAG)n	1	1
chr1	106927312	chr1	106927313	36	FALSE	scaffold00011_hap1	107303483	107303519	INS	1|1	Simple_repeat	1	Simple_repeat	1	(AAGG)n	1	1	Simple_repeat	1	Simple_repeat	1	(AAGG)n	1	1
chr1	107019932	chr1	107019968	36	FALSE	scaffold00011_hap1	107396161	107396162	DEL	1|0	Simple_repeat	1	Simple_repeat	1	(TA)n	1	1
chr1	107181550	chr1	107181551	34	FALSE	scaffold00011_hap1	107557732	107557766	INS	1|1
chr1	107555333	chr1	107555334	51	FALSE	scaffold00011_hap1	107931534	107931585	INS	1|0	hAT-Charlie	1	DNA	1	Charlie16a	1		hAT-Charlie	1	DNA	1	Charlie16a	1
chr1	107599844	chr1	107599845	311	FALSE	scaffold00011_hap1	107976088	107976399	INS	1|0								Alu	0.96463	SINE	0.96463	AluYb8	0.96463
chr1	107753513	chr1	107753514	30	FALSE	scaffold00011_hap1	108130034	108130064	INS	1|0	Simple_repeat	1	Simple_repeat	1	(TATA)n	1	1	Simple_repeat	0.866667	Simple_repeat	0.866667	(AT)n	0.866667	1
chr1	108023450	chr1	108023451	56	FALSE	scaffold00011_hap1	108400039	108400095	INS	1|0							1							1
chr1	108024930	chr1	108024931	264	FALSE	scaffold00011_hap1	108401578	108401842	INS	1|0	Alu	1	SINE	1	AluSq10	1		Alu	1	SINE	1	AluSq10	1
chr1	108523178	chr1	108523230	52	FALSE	scaffold00011_hap1	108900589	108900590	DEL	1|0	Simple_repeat	1	Simple_repeat	1	(AT)n	1	1	Simple_repeat	1	Simple_repeat	1	(AT)n	1	1
chr1	108523826	chr1	108523864	38	FALSE	scaffold00011_hap1	108901185	108901186	DEL	1|0	Simple_repeat	1	Simple_repeat	1	(AT)n	1	1	Simple_repeat	1	Simple_repeat	1	(AT)n	1	1
chr1	108666577	chr1	108666578	52	FALSE	scaffold00011_hap1	109043880	109043932	INS	1|1								Simple_repeat	0.961538	Simple_repeat	0.961538	(TAATA)n	0.961538
chr1	108675987	chr1	108675988	160	FALSE	scaffold00011_hap1	109053336	109053496	INS	1|1	SVA	1	Retroposon	1	SVA_F	1	1	SVA	1	Retroposon	1	SVA_D	1	1
chr1	108689608	chr1	108689609	68	FALSE	scaffold00011_hap1	109067116	109067184	INS	1|1	L1	1	LINE	1	L1ME1	1		Simple_repeat	0.852941	Simple_repeat	0.852941	(TA)n	0.852941	0.852941
chr1	108771655	chr1	108771656	49	FALSE	scaffold00011_hap1	109149296	109149345	INS	1|0							1							1
chr1	108771824	chr1	108771825	116	FALSE	scaffold00011_hap1	109149506	109149622	INS	1|0							1							1
chr1	108908728	chr1	108908729	34	FALSE	scaffold00011_hap1	109286626	109286660	INS	1|0	Simple_repeat	1	Simple_repeat	1	(CA)n	1		Simple_repeat	1	Simple_repeat	1	(AC)n	1	1
chr1	108917609	chr1	108917647	38	FALSE	scaffold00011_hap1	109295533	109295534	DEL	1|0	Simple_repeat	0.947368	Simple_repeat	0.947368	(AT)n	0.947368	0.947368
chr1	109055097	chr1	109055428	331	FALSE	scaffold00011_hap1	109433016	109433017	DEL	1|1	Alu	0.969789	SINE	0.969789	AluYe5	0.969789	0.924471	Alu	1	SINE	1	AluSp	1	1
chr1	109071957	chr1	109072117	160	FALSE	scaffold00011_hap1	109449533	109449534	DEL	1|1	Simple_repeat	1	Simple_repeat	1	(AT)n	1	1
chr1	109148256	chr1	109148295	39	FALSE	scaffold00011_hap1	109525663	109525664	DEL	1|1	Alu	1	SINE	1	AluSx1	1		Alu	1	SINE	1	AluSx	1
chr1	109511239	chr1	109511274	35	FALSE	scaffold00011_hap1	109888562	109888563	DEL	1|0	Simple_repeat	0.542857	Simple_repeat	0.542857	(AAAG)n	0.542857	0.542857	Simple_repeat	1	Simple_repeat	1	(AAAG)n	1	1
chr1	109644599	chr1	109648826	482	FALSE	scaffold00011_hap1	110021844	110025589	DEL	1|0
chr1	109654091	chr1	109654190	99	TRUE	scaffold00011_hap1	110030834	110030835	DEL	1|0	Simple_repeat	1	Simple_repeat	1	(AGAA)n	1	1
chr1	109670103	chr1	109670104	45	FALSE	scaffold00011_hap1	110046734	110046779	INS	1|1	ERV1	1	LTR	1	LTR12_	1		ERV1	1	LTR	1	LTR12D	1	0.733333
chr1	109725063	chr1	109725064	110	FALSE	scaffold00011_hap1	110101736	110101846	INS	1|0	Simple_repeat	1	Simple_repeat	1	(GGAAG)n	1	1							1
chr1	110120541	chr1	110120542	5140	FALSE	scaffold00011_hap1	110497343	110502483	INS	1|1	Simple_repeat	1	Simple_repeat	1	(CACCAC)n	1	1	Simple_repeat	0.87821	Simple_repeat	0.87821	(CACCAC)n	0.87821	1
chr1	110310153	chr1	110310154	80	FALSE	scaffold00011_hap1	110692127	110692207	INS	1|1								L2	0.65	LINE	0.65	L2c	0.65
chr1	110387819	chr1	110387820	37	FALSE	scaffold00011_hap1	110769930	110769967	INS	1|1	RTE-BovB	1	LINE	1	MamRTE1	1
chr1	110458039	chr1	110458072	33	FALSE	scaffold00011_hap1	110840177	110840178	DEL	1|1	Alu	1	SINE	1	AluYa5	1	1
chr1	110504898	chr1	110504930	32	FALSE	scaffold00011_hap1	110887038	110887039	DEL	1|0	Alu	1	SINE	1	AluSx3	1	1	Alu	1	SINE	1	AluY	1
chr1	110569627	chr1	110569687	60	FALSE	scaffold00011_hap1	110951716	110951717	DEL	1|0							1							1
chr1	110773783	chr1	110773881	98	FALSE	scaffold00011_hap1	111155828	111155829	DEL	1|0	Simple_repeat	1	Simple_repeat	1	(AG)n	1	1	Simple_repeat	1	Simple_repeat	1	(AG)n	1	1
chr1	111067677	chr1	111067709	32	FALSE	scaffold00011_hap1	111449685	111449686	DEL	1|0	Simple_repeat	1	Simple_repeat	1	(TTCC)n	1	1							1
chr1	111245805	chr1	111245840	35	FALSE	scaffold00011_hap1	111627806	111627807	DEL	1|1	Simple_repeat	1	Simple_repeat	1	(TCCTC)n	1	1
chr1	111259975	chr1	111259976	985	FALSE	scaffold00011_hap1	111641941	111642926	INS	1|0	ERVL-MaLR	1	LTR	1	MLT1A1	1		ERVL-MaLR	1	LTR	1	MLT1A1	1
chr1	111353565	chr1	111353566	1911	FALSE	scaffold00011_hap1	111736488	111738399	INS	1|0
chr1	111414892	chr1	111414961	69	FALSE	scaffold00011_hap1	111799703	111799704	DEL	1|0							1
chr1	111544741	chr1	111544742	204	FALSE	scaffold00011_hap1	111929460	111929664	INS	1|0							1							1
chr1	111607694	chr1	111607870	176	FALSE	scaffold00011_hap1	111992605	111992606	DEL	1|1	SVA	1	Retroposon	1	SVA_D	1	1	SVA	1	Retroposon	1	SVA_D	1	1
chr1	112104740	chr1	112104741	32	FALSE	scaffold00011_hap1	112489466	112489498	INS	1|1	Simple_repeat	1	Simple_repeat	1	(TATAT)n	1	1	Simple_repeat	1	Simple_repeat	1	(ATATT)n	1	1
chr1	112146944	chr1	112146945	44	FALSE	scaffold00011_hap1	112531702	112531746	INS	1|1	Simple_repeat	1	Simple_repeat	1	(CTTC)n	1	1	Simple_repeat	1	Simple_repeat	1	(CTTC)n	1	1
chr1	112149168	chr1	112162081	12913	FALSE	scaffold00011_hap1	112533981	112533982	DEL	1|1								ERVL-MaLR	1	LTR	1	THE1D-int	1
chr1	112292465	chr1	112295043	2578	FALSE	scaffold00011_hap1	112664370	112664371	DEL	1|1	SVA	0.573313	Retroposon	0.573313	SVA_E	0.573313		L1	1	LINE	1	L1PA5	1
chr1	112449372	chr1	112449373	316	FALSE	scaffold00011_hap1	112818680	112818996	INS	1|0								Alu	0.958861	SINE	0.958861	AluYa5	0.958861
chr1	112774088	chr1	112774137	49	FALSE	scaffold00011_hap1	113143726	113143727	DEL	1|0	SVA	1	Retroposon	1	SVA_F	1	1	SVA	1	Retroposon	1	SVA_F	1	1
chr1	113022577	chr1	113022615	38	FALSE	scaffold00011_hap1	113392162	113392163	DEL	1|0	Simple_repeat	0.921053	Simple_repeat	0.921053	(TA)n	0.921053	0.921053	Simple_repeat	1	Simple_repeat	1	(TA)n	1	1
chr1	113069433	chr1	113069482	49	FALSE	scaffold00011_hap1	113438938	113438939	DEL	1|1	SVA	1	Retroposon	1	SVA_F	1	1	SVA	1	Retroposon	1	SVA_F	1	1
chr1	113070051	chr1	113070101	50	FALSE	scaffold00011_hap1	113439505	113439506	DEL	1|1	SVA	1	Retroposon	1	SVA_F	1	1	SVA	1	Retroposon	1	SVA_F	1	1
chr1	113070317	chr1	113070318	48	FALSE	scaffold00011_hap1	113439720	113439768	INS	1|1	SVA	1	Retroposon	1	SVA_F	1	1	SVA	1	Retroposon	1	SVA_F	1	1
chr1	113416162	chr1	113416163	131	FALSE	scaffold00011_hap1	113785623	113785754	INS	1|1							1	Simple_repeat	1	Simple_repeat	1	(ATTA)n	1	1
chr1	113416210	chr1	113416211	66	FALSE	scaffold00011_hap1	113785802	113785868	INS	1|1							1	Simple_repeat	1	Simple_repeat	1	(ATTA)n	1	1
chr1	113416469	chr1	113416470	201	FALSE	scaffold00011_hap1	113786139	113786340	INS	1|1							1	Simple_repeat	1	Simple_repeat	1	(ATTA)n	1	1
chr1	113641071	chr1	113641108	37	FALSE	scaffold00011_hap1	114010934	114010935	DEL	1|1	Simple_repeat	1	Simple_repeat	1	(AT)n	1	1	Simple_repeat	1	Simple_repeat	1	(AT)n	1	1
chr1	114111729	chr1	114111730	52	FALSE	scaffold00011_hap1	114481567	114481619	INS	1|0
chr1	114149220	chr1	114149221	38	FALSE	scaffold00011_hap1	114519081	114519119	INS	1|1	Simple_repeat	1	Simple_repeat	1	(TG)n	1		Simple_repeat	1	Simple_repeat	1	(TG)n	1	1
chr1	114479827	chr1	114479828	48	FALSE	scaffold00011_hap1	114849749	114849797	INS	1|0	SVA	1	Retroposon	1	SVA_C	1	1	SVA	1	Retroposon	1	SVA_C	1	1
chr1	114500898	chr1	114501210	312	FALSE	scaffold00011_hap1	114870862	114870863	DEL	1|0	Alu	0.967949	SINE	0.967949	AluYa5	0.967949		ERVL-MaLR	1	LTR	1	MLT1F	1
chr1	114658773	chr1	114658774	317	FALSE	scaffold00011_hap1	115028393	115028710	INS	1|0
chr1	115254267	chr1	115254551	284	FALSE	scaffold00011_hap1	115624189	115624190	DEL	1|0	Alu	0.954225	SINE	0.954225	AluYa5	0.954225		L1	1	LINE	1	L1ME3D	1
chr1	115560086	chr1	115560124	38	FALSE	scaffold00011_hap1	115929717	115929718	DEL	1|1
chr1	115568534	chr1	115568581	47	FALSE	scaffold00011_hap1	115938132	115938133	DEL	1|1	L1	1	LINE	1	L1MA4A	1	1	L1	1	LINE	1	L1MA4A	1
chr1	115686862	chr1	115690219	3357	FALSE	scaffold00011_hap1	116056362	116056363	DEL	1|0
chr1	115761473	chr1	115761474	198	FALSE	scaffold00011_hap1	116127629	116127827	INS	1|0	Simple_repeat	1	Simple_repeat	1	(AAG)n	1	1	Simple_repeat	0.520202	Simple_repeat	0.520202	(GGGAAG)n	0.520202	1
chr1	115808586	chr1	115808625	39	FALSE	scaffold00011_hap1	116174924	116174925	DEL	1|0	Simple_repeat	1	Simple_repeat	1	(TTCT)n	1	1	Simple_repeat	1	Simple_repeat	1	(TTCT)n	1	1
chr1	116100759	chr1	116100793	34	FALSE	scaffold00011_hap1	116467032	116467033	DEL	1|0	Simple_repeat	1	Simple_repeat	1	(TA)n	1	1	Simple_repeat	1	Simple_repeat	1	(TA)n	1	1
chr1	116152683	chr1	116152684	77	FALSE	scaffold00011_hap1	116518917	116518994	INS	1|1	Low_complexity	1	Low_complexity	1	A-rich	1		Simple_repeat	1	Simple_repeat	1	(GGGGA)n	1	1
chr1	116305909	chr1	116305910	50	FALSE	scaffold00011_hap1	116672201	116672251	INS	1|1	Simple_repeat	1	Simple_repeat	1	(TA)n	1		Simple_repeat	1	Simple_repeat	1	(TA)n	1	1
chr1	116437010	chr1	116437011	2177	FALSE	scaffold00011_hap1	116803362	116805539	INS	1|1	Simple_repeat	1	Simple_repeat	1	(AT)n	1	1							1
chr1	117029139	chr1	117029213	74	FALSE	scaffold00011_hap1	117397733	117397734	DEL	1|0	Simple_repeat	1	Simple_repeat	1	(AGAA)n	1	1	Simple_repeat	1	Simple_repeat	1	(AGAA)n	1	1
chr1	117259468	chr1	117259469	54	FALSE	scaffold00011_hap1	117627996	117628050	INS	1|1	ERVL-MaLR	1	LTR	1	THE1C-int	1		ERVL-MaLR	1	LTR	1	THE1C-int	1
chr1	117430025	chr1	117430026	176	FALSE	scaffold00011_hap1	117798605	117798781	INS	1|1	SVA	1	Retroposon	1	SVA_F	1	1	SVA	1	Retroposon	1	SVA_D	1	1
chr1	117548414	chr1	117548636	222	FALSE	scaffold00011_hap1	117917171	117917172	DEL	1|1	Alu	0.932432	SINE	0.932432	AluYa5	0.932432		L1	1	LINE	1	L1MEg	1
chr1	118318850	chr1	118318851	751	FALSE	scaffold00011_hap1	118687442	118688193	INS	1|1	Simple_repeat	1	Simple_repeat	1	(AT)n	1	1	Simple_repeat	1	Simple_repeat	1	(AT)n	1	1
chr1	118319187	chr1	118319188	128	FALSE	scaffold00011_hap1	118688529	118688657	INS	1|1	Simple_repeat	1	Simple_repeat	1	(AT)n	1	1	Simple_repeat	1	Simple_repeat	1	(AT)n	1	1
chr1	118387355	chr1	118387356	223	FALSE	scaffold00011_hap1	118756803	118757026	INS	1|0	Simple_repeat	1	Simple_repeat	1	(ATATAT)n	1	1							1
chr1	118389107	chr1	118389108	2666	FALSE	scaffold00011_hap1	118758768	118761434	INS	1|1
chr1	118401435	chr1	118401483	48	FALSE	scaffold00011_hap1	118773767	118773768	DEL	1|0	Simple_repeat	1	Simple_repeat	1	(TA)n	1	1	Simple_repeat	1	Simple_repeat	1	(TA)n	1	1
chr1	118834676	chr1	118834711	35	FALSE	scaffold00011_hap1	119206823	119206824	DEL	1|0	L1	1	LINE	1	L1PA3	1		L1	1	LINE	1	L1PA3	1
chr1	119389137	chr1	119389138	84	FALSE	scaffold00011_hap1	119761314	119761398	INS	1|1	Simple_repeat	1	Simple_repeat	1	(AT)n	1	1	Simple_repeat	1	Simple_repeat	1	(AT)n	1	1
chr1	119421419	chr1	119421465	46	FALSE	scaffold00011_hap1	119793669	119793670	DEL	1|1	Simple_repeat	1	Simple_repeat	1	(TA)n	1	1	Simple_repeat	1	Simple_repeat	1	(TA)n	1	1
chr1	119569939	chr1	119569940	40	FALSE	scaffold00011_hap1	119942117	119942157	INS	1|1	Simple_repeat	1	Simple_repeat	1	(AAGA)n	1	1	Simple_repeat	1	Simple_repeat	1	(AAGA)n	1	1
chr1	120076642	chr1	120076643	1023	FALSE	scaffold00011_hap1	120448820	120449843	INS	1|1	Simple_repeat	1	Simple_repeat	1	(A)n	1
chr1	120106613	chr1	120106643	30	TRUE	scaffold00011_hap1	120479803	120479804	DEL	1|0	Simple_repeat	1	Simple_repeat	1	(TA)n	1	1	MIR	1	SINE	1	MIR	1
chr1	120170936	chr1	120171016	80	TRUE	scaffold00011_hap1	120544103	120544104	DEL	1|0							0.7125
chr1	120245849	chr1	120245850	323	TRUE	scaffold00011_hap1	120618940	120619263	INS	1|0								Alu	0.956656	SINE	0.956656	AluYb8	0.956656
chr1	121616702	chr1	121616703	536	TRUE	scaffold00050_hap1	21713	22249	INS	1|0	centr	1	Satellite	1	ALR/Alpha	1	1							1
chr1	121618702	chr1	121619238	536	TRUE	scaffold00050_hap1	19712	19713	DEL	1|0	centr	0.708955	Satellite	0.708955	ALR/Alpha	0.708955	1	centr	1	Satellite	1	ALR/Alpha	1	1
chr1	121619349	chr1	121619381	32	TRUE	scaffold00050_hap1	19601	19602	DEL	1|0	centr	1	Satellite	1	ALR/Alpha	1	1							1
chr1	121621253	chr1	121621350	97	TRUE	scaffold00050_hap1	17713	17714	DEL	1|0	centr	1	Satellite	1	ALR/Alpha	1	1	centr	1	Satellite	1	ALR/Alpha	1	1
chr1	121744838	chr1	121745178	340	TRUE	contig00118_hap1	121594	121595	DEL	1|0	centr	1	Satellite	1	ALR/Alpha	1	1	centr	1	Satellite	1	ALR/Alpha	1	1
chr1	122262272	chr1	122262407	135	TRUE	scaffold00050_hap1	3808	3809	DEL	1|0	centr	1	Satellite	1	ALR/Alpha	1	1	centr	1	Satellite	1	ALR/Alpha	1	1
chr1	122269833	chr1	122269834	219	TRUE	scaffold00050_hap1	11282	11501	INS	1|0	centr	1	Satellite	1	ALR/Alpha	1	1	centr	1	Satellite	1	ALR/Alpha	1	1
chr1	124996134	chr1	124996305	171	TRUE	contig00798_hap1	18180	18181	DEL	1|0	centr	1	Satellite	1	ALR/Alpha	1	1	centr	1	Satellite	1	ALR/Alpha	1	1
chr1	125013225	chr1	125013226	223	TRUE	contig00798_hap1	35102	35325	INS	1|0	L1	1	LINE	1	L1PA3	1		L1	1	LINE	1	L1PA3	1
chr1	125017382	chr1	125017383	69	TRUE	contig00798_hap1	39480	39549	INS	1|0	L1	1	LINE	1	L1PA3	1		L1	1	LINE	1	L1PA3	1
chr1	125025272	chr1	125025725	454	TRUE	contig00798_hap1	47438	47439	DEL	1|0	centr	1	Satellite	1	ALR/Alpha	1	1	centr	1	Satellite	1	ALR/Alpha	1	1
chr1	125026047	chr1	125026048	169	TRUE	contig00798_hap1	47760	47929	INS	1|0	centr	1	Satellite	1	ALR/Alpha	1	1	centr	1	Satellite	1	ALR/Alpha	1	1
chr1	125086680	chr1	125086681	624	TRUE	contig00798_hap1	108562	109186	INS	1|0							1
chr1	125103210	chr1	125103211	85	TRUE	contig00798_hap1	125673	125758	INS	1|0	ERVL	1	LTR	1	MER54A	1		ERVL	0.588235	LTR	0.588235	MER54A	0.588235
chr1	125167953	chr1	125167954	465	TRUE	contig00798_hap1	190780	191245	INS	1|0	Simple_repeat	1	Simple_repeat	1	(GATTC)n	1	1	Simple_repeat	1	Simple_repeat	1	(GATTC)n	1	1
chr1	125170561	chr1	125170562	372	TRUE	contig00798_hap1	193853	194225	INS	1|0							1	Simple_repeat	1	Simple_repeat	1	(GATTC)n	1	1
chr1	125182811	chr1	125183136	325	TRUE	contig00699_hap1	130753	130754	DEL	1|0							1							1
chr1	125184237	chr1	125184238	78	TRUE	contig00699_hap1	129564	129642	INS	1|0							1							1
chr1	143260903	chr1	143260955	52	TRUE	contig00030_hap1	39947	39948	DEL	1|0							1							1
chr1	143263709	chr1	143263758	49	TRUE	contig00030_hap1	37201	37202	DEL	1|0							1							1
chr1	143274160	chr1	143274161	2290	TRUE	contig00030_hap1	24577	26867	INS	1|0							1							1
chr1	143534164	chr1	143534578	65	TRUE	scaffold00050_hap1	889697	890046	DEL	1|0	Low_complexity	0.876812	Low_complexity	0.876812	GA-rich	0.876812		Simple_repeat	0.888252	Simple_repeat	0.888252	(TTCT)n	0.888252
chr1	143734836	chr1	143735128	292	TRUE	scaffold00050_hap1	689533	689534	DEL	1|0	Alu	0.965753	SINE	0.965753	AluSp	0.965753		L1	1	LINE	1	L1ME3G	1
chr1	143751806	chr1	143753603	1797	TRUE	scaffold00050_hap1	672860	672861	DEL	1|0	L1	0.964942	LINE	0.964942	L1PA3	0.964942		L1	1	LINE	1	L1MEc	1
chr1	143800212	chr1	143800280	68	TRUE	scaffold00050_hap1	626322	626323	DEL	1|0							1
chr1	143840916	chr1	143840917	40	TRUE	scaffold00050_hap1	585689	585729	INS	1|0	Simple_repeat	1	Simple_repeat	1	(TA)n	1		L1	1	LINE	1	L1MC4	1	1
chr1	143893114	chr1	143893115	86	TRUE	scaffold00050_hap1	533416	533502	INS	1|0	Alu	1	SINE	1	AluJb	1
chr1	143916784	chr1	143917101	317	TRUE	scaffold00050_hap1	509749	509750	DEL	1|0	Alu	0.958991	SINE	0.958991	AluYa5	0.958991		TcMar-Tigger	1	DNA	1	Tigger4	1
chr1	143923267	chr1	143923590	323	TRUE	scaffold00050_hap1	503585	503586	DEL	1|0	Alu	0.956656	SINE	0.956656	AluYb9	0.956656		hAT-Charlie	1	DNA	1	Charlie21a	1
chr1	144078213	chr1	144078295	82	TRUE	contig00154_hap1	11829	11830	DEL	1|0							1
chr1	144361785	chr1	144361786	40	TRUE	contig00693_hap1	17199	17239	INS	1|0	Simple_repeat	1	Simple_repeat	1	(TA)n	1	1	Simple_repeat	0.7	Simple_repeat	0.7	(TA)n	0.7	0.7
chr1	144813543	chr1	144813544	132	TRUE	contig00217_hap1	49417	49549	INS	1|0	telo	1	Satellite	1	TAR1	1	1	telo	0.628788	Satellite	0.628788	TAR1	0.628788	1
chr1	144813649	chr1	144813650	165	TRUE	contig00217_hap1	49654	49819	INS	1|0	telo	1	Satellite	1	TAR1	1	1	telo	0.624242	Satellite	0.624242	TAR1	0.624242	1
chr1	144814101	chr1	144814102	59	TRUE	contig00217_hap1	50313	50372	INS	1|0	telo	1	Satellite	1	TAR1	1	1	telo	1	Satellite	1	TAR1	1	1
chr1	144825959	chr1	144825960	529	TRUE	contig00217_hap1	62220	62749	INS	1|0	Simple_repeat	1	Simple_repeat	1	(GATGA)n	1	1	Low_complexity	1	Low_complexity	1	A-rich	1	1
chr1	144827392	chr1	144827393	2238	TRUE	contig00217_hap1	64182	66420	INS	1|0	L1	1	LINE	1	HAL1b	1	1	Low_complexity	1	Low_complexity	1	A-rich	1	1
chr1	144827513	chr1	144827813	300	TRUE	contig00499_hap1	10520	10521	DEL	1|0	L1	0.653333	LINE	0.653333	L1MEd	0.653333	1	Simple_repeat	1	Simple_repeat	1	(TCATT)n	1	1
chr1	144827865	chr1	144827866	448	TRUE	contig00217_hap1	66918	67366	INS	1|0	L1	1	LINE	1	L1MEd	1	1	Low_complexity	1	Low_complexity	1	A-rich	1	1
chr1	145160905	chr1	145160973	68	FALSE	scaffold00018_hap1	133352263	133352264	DEL	1|1							1
chr1	145312572	chr1	148548910	3236623	TRUE	scaffold00011_hap1	178071000	178071285	DEL	1|0														1
chr1	145327327	chr1	145327384	57	TRUE	scaffold00011_hap1	178056480	178056481	DEL	1|0							1							1
chr1	145411770	chr1	145411771	1562	TRUE	scaffold00018_hap1	133632161	133633723	INS	1|0	L1	1	LINE	1	L1ME2	1
chr1	145525724	chr1	145525813	89	TRUE	scaffold00018_hap1	133746802	133746803	DEL	1|0	Simple_repeat	1	Simple_repeat	1	(TATA)n	1	0.786517	L1	1	LINE	1	L1MB1	1	1
chr1	145576032	chr1	145576033	30	FALSE	scaffold00018_hap1	133835892	133835922	INS	1|0	Simple_repeat	1	Simple_repeat	1	(AC)n	1	1	Simple_repeat	1	Simple_repeat	1	(AC)n	1	1
chr1	145766799	chr1	145766800	38	TRUE	scaffold00018_hap1	134026696	134026734	INS	1|0	SVA	1	Retroposon	1	SVA_D	1	1	SVA	1	Retroposon	1	SVA_D	1	1
chr1	146428261	chr1	146428574	313	TRUE	scaffold00011_hap1	120902914	120902915	DEL	1|0	Alu	0.948882	SINE	0.948882	AluYe5	0.948882		L1	1	LINE	1	L1M7	1
chr1	146591245	chr1	146591246	77	FALSE	scaffold00019_hap1	24552880	24552957	INS	1|0														1
chr1	146813263	chr1	146813565	302	TRUE	scaffold00019_hap1	24832455	24832456	DEL	1|0	Alu	0.970199	SINE	0.970199	AluY	0.970199		TcMar-Tigger	1	DNA	1	MER8	1
chr1	146944970	chr1	146945010	40	TRUE	scaffold00019_hap1	24963799	24963800	DEL	1|0	Simple_repeat	1	Simple_repeat	1	(TTCC)n	1	1	Simple_repeat	1	Simple_repeat	1	(TTCC)n	1	1
chr1	147059346	chr1	147059378	32	FALSE	scaffold00019_hap1	25699705	25699706	DEL	1|1	Simple_repeat	1	Simple_repeat	1	(GAAA)n	1	1	Simple_repeat	1	Simple_repeat	1	(GAAA)n	1	1
chr1	147061213	chr1	147061257	44	FALSE	scaffold00019_hap1	25701540	25701541	DEL	1|0	Simple_repeat	1	Simple_repeat	1	(CTCCCT)n	1	1	Simple_repeat	1	Simple_repeat	1	(CCTCTC)n	1	1
chr1	147091938	chr1	147091939	413	FALSE	scaffold00019_hap1	25732258	25732671	INS	1|0	Alu	1	SINE	1	AluJo	1	1
chr1	147148011	chr1	147148012	32	FALSE	scaffold00019_hap1	25788756	25788788	INS	1|1	Simple_repeat	1	Simple_repeat	1	(TA)n	1	1	ERVL	0.71875	LTR	0.71875	MLT2A1	0.71875
chr1	147233373	chr1	147233374	49	FALSE	scaffold00019_hap1	25874130	25874179	INS	1|1	SVA	1	Retroposon	1	SVA_D	1	1	SVA	1	Retroposon	1	SVA_D	1	1
chr1	147488594	chr1	147488595	104	FALSE	scaffold00019_hap1	26129515	26129619	INS	1|0	MIR	1	SINE	1	MIR	1		MIR	0.990385	SINE	0.990385	MIRb	0.990385	1
chr1	147489693	chr1	147489694	72	FALSE	scaffold00019_hap1	26130718	26130790	INS	1|0	hAT-Charlie	1	DNA	1	Charlie29a	1		hAT-Charlie	1	DNA	1	Charlie29b	1	1
chr1	147541070	chr1	147541121	51	FALSE	scaffold00019_hap1	26182186	26182187	DEL	1|0	Simple_repeat	1	Simple_repeat	1	(GA)n	1	1	Simple_repeat	1	Simple_repeat	1	(GA)n	1	1
chr1	147652889	chr1	147652890	307	FALSE	scaffold00019_hap1	26294014	26294321	INS	1|0	Alu	1	SINE	1	AluY	1		Alu	0.771987	SINE	0.771987	AluY	0.771987	1
chr1	147920513	chr1	147920514	99	FALSE	scaffold00019_hap1	26562019	26562118	INS	1|0							1							1
chr1	147949447	chr1	147949448	118	FALSE	scaffold00019_hap1	26591047	26591165	INS	1|1	SVA	1	Retroposon	1	SVA_D	1	1	SVA	1	Retroposon	1	SVA_D	1	1
chr1	148085766	chr1	148085806	40	TRUE	scaffold00019_hap1	26727440	26727441	DEL	1|0	Simple_repeat	0.9	Simple_repeat	0.9	(AT)n	0.9	0.9	Simple_repeat	1	Simple_repeat	1	(AC)n	1	1
[truncated: 40,341 more rows]

## Sheet: SV calls hybrid assembly
start_chr	break_start	end_chr	break_end	type	size
contig00323	5334	contig00323	5373	DEL	38
contig00323	5825	contig00323	6784	DEL	958
[truncated: 16,287 more rows]

## Sheet: SRA submission - PacBio
bioproject_accession	biosample_accession	library_ID	title	library_strategy	library_source	library_selection	library_layout	platform	instrument_model	design_description	filetype	filename	filename2	filename3	filename4	assembly
[truncated: 382 more rows]

[truncated: 2 more sheets: SRA submission - linked reads, SRA submission - sorted chrom]
